# Supplementary material
Source: PubMed Central journal article supplement (PMC3789846)
Supplement: NIHMS487582-supplement-Table_1.pdf [file NIHMS487582-supplement-Table_1.pdf]

|            |           |                                                                                          |        |        |        |   |         |            |            |            |            |           |           |           |           |        |      |      |      |      |      |      |      |     |      |      |      |     |     |      |     |      |
|------------|-----------|------------------------------------------------------------------------------------------|--------|--------|--------|---|---------|------------|------------|------------|------------|-----------|-----------|-----------|-----------|--------|------|------|------|------|------|------|------|-----|------|------|------|-----|-----|------|-----|------|
| P00000293  | SART3     | isoform 1 of Squamous cell carcinoma antigen recognized by T-cells 3                     | 99.4%  | 1.5    | 1      | 1 | 1       | 4          | 762.808    | 708.490    | 684.855    | 869.643   | 59.663    | 72.043    | 43.971    | 40.087 | 17.5 | 22.7 | 14.4 | 10.3 | -1.1 | 0.6  | -1.1 | 0.3 | 1.1  | 0.2  | -1.0 | 0.8 | 1.2 | 0.09 | 1.3 | 0.01 |
| P000719254 | SART3     | SART3 protein                                                                            | 99.4%  | 1.5    | 1      | 1 | 1       | 4          | 762.808    | 708.490    | 684.855    | 869.643   | 59.663    | 72.043    | 43.971    | 40.087 | 17.5 | 22.7 | 14.4 | 10.3 | -1.1 | 0.6  | -1.1 | 0.3 | 1.1  | 0.2  | -1.0 | 0.8 | 1.2 | 0.09 | 1.3 | 0.01 |
| P000719261 | SART3     | cDNA FL151777, highly similar to Squamous cell carcinoma antigen recognized by T-cells 3 | 99.4%  | 2.0    | 1      | 1 | 1       | 4          | 762.808    | 708.490    | 684.855    | 869.643   | 59.663    | 72.043    | 43.971    | 40.087 | 17.5 | 22.7 | 14.4 | 10.3 | -1.1 | 0.6  | -1.1 | 0.3 | 1.1  | 0.2  | -1.0 | 0.8 | 1.2 | 0.09 | 1.3 | 0.01 |
| P010714243 | SART3     | 60 kDa protein                                                                           | 99.4%  | 2.7    | 1      | 1 | 1       | 4          | 762.808    | 708.490    | 684.855    | 869.643   | 59.663    | 72.043    | 43.971    | 40.087 | 17.5 | 22.7 | 14.4 | 10.3 | -1.1 | 0.6  | -1.1 | 0.3 | 1.1  | 0.2  | -1.0 | 0.8 | 1.2 | 0.09 | 1.3 | 0.01 |
| P00006034  | CRP2      | Cytosine-rich protein 2                                                                  | 100.0% |        |        |   |         |            |            |            |            |           |           |           |           |        |      |      |      |      |      |      |      |     |      |      |      |     |     |      |     |      |
|            |           | ASSVYIFFDGNTCPK                                                                          | 2      | 100.0% | 3      | 1 | 3       | 3,301.609  | 3,805.506  | 3,604.186  | 4,320.110  | 337.700   | 292.953   | 420.136   | 200.752   | 22.9   | 17.2 | 26.1 | 10.4 | 1.2  | 0.3  | 1.1  | 0.6  | 1.3 | 0.03 | -1.1 | 0.7  | 1.1 | 0.2 | 1.2  | 0.2 | 0.2  |
|            |           | GVNNGAGSYTKPKAEQPGVPTGPPVPAK                                                             | 3      | 100.0% | 2      |   |         |            |            |            |            |           |           |           |           |        |      |      |      |      |      |      |      |     |      |      |      |     |     |      |     |      |
| P00006053  | PF2N2     | Profilin subunit 2                                                                       | 100.0% | 2      | 100.0% | 2 | 1       | 31,108.480 | 28,315.550 | 30,092.160 | 31,985.020 | 2,067.189 | 1,126.389 | 1,102.922 | 1,614.759 | 14.8   | 8.9  | 8.2  | 11.3 | -1.1 | 0.3  | -1.0 | 0.7  | 1.0 | 0.7  | 1.1  | 0.3  | 1.1 | 0.1 | 0.1  | 1.1 | 0.4  |
|            |           | GVASVAGVAGFNR                                                                            | 2      | 100.0% | 1      |   |         |            |            |            |            |           |           |           |           |        |      |      |      |      |      |      |      |     |      |      |      |     |     |      |     |      |
|            |           | IKETLQGLQAK                                                                              | 2      | 85.1%  | 1      | 9 | 602.734 | 656.531    | 539.433    | 733.972    | 86.145     | 56.084    | 67.400    | 65.719    | 32.0      | 19.1   | 27.9 | 20.0 | 1.1  | 0.6  | -1.1 | 0.6  | 1.2  | 0.3 | -1.2 | 0.2  | 1.1  | 0.4 | 1.4 | 0.07 |     |      |
| P000413671 | BCLAF1    | isoform 1 of Bcl-2-associated transcription factor 1                                     | 94.6%  | 1.4    | 1      | 1 | 1       | 9          | 602.734    | 656.531    | 539.433    | 733.972   | 86.145    | 56.084    | 67.400    | 65.719 | 32.0 | 19.1 | 27.9 | 20.0 | 1.1  | 0.6  | -1.1 | 0.6 | 1.2  | 0.3  | -1.2 | 0.2 | 1.1 | 0.4  | 1.4 | 0.07 |
| P000413672 | BCLAF1    | isoform 2 of Bcl-2-associated transcription factor 1                                     | 94.6%  | 1.4    | 1      | 1 | 1       | 9          | 602.734    | 656.531    | 539.433    | 733.972   | 86.145    | 56.084    | 67.400    | 65.719 | 32.0 | 19.1 | 27.9 | 20.0 | 1.1  | 0.6  | -1.1 | 0.6 | 1.2  | 0.3  | -1.2 | 0.2 | 1.1 | 0.4  | 1.4 | 0.07 |
| P000979824 | BCLAF1    | Uncharacterized protein                                                                  | 94.6%  | 1.5    | 1      | 1 | 1       | 9          | 602.734    | 656.531    | 539.433    | 733.972   | 86.145    | 56.084    | 67.400    | 65.719 | 32.0 | 19.1 | 27.9 | 20.0 | 1.1  | 0.6  | -1.1 | 0.6 | 1.2  | 0.3  | -1.2 | 0.2 | 1.1 | 0.4  | 1.4 | 0.07 |
| P000979758 | BCLAF1    | Uncharacterized protein                                                                  | 94.6%  | 1.5    | 1      | 1 | 1       | 9          | 602.734    | 656.531    | 539.433    | 733.972   | 86.145    | 56.084    | 67.400    | 65.719 | 32.0 | 19.1 | 27.9 | 20.0 | 1.1  | 0.6  | -1.1 | 0.6 | 1.2  | 0.3  | -1.2 | 0.2 | 1.1 | 0.4  | 1.4 | 0.07 |
| P000979390 | BCLAF1    | Uncharacterized protein                                                                  | 94.6%  | 1.7    | 1      | 1 | 1       | 9          | 602.734    | 656.531    | 539.433    | 733.972   | 86.145    | 56.084    | 67.400    | 65.719 | 32.0 | 19.1 | 27.9 | 20.0 | 1.1  | 0.6  | -1.1 | 0.6 | 1.2  | 0.3  | -1.2 | 0.2 | 1.1 | 0.4  | 1.4 | 0.07 |
| P000884441 | BCLAF1    | Uncharacterized protein                                                                  | 94.6%  | 1.5    | 1      | 1 | 1       | 9          | 602.734    | 656.531    | 539.433    | 733.972   | 86.145    | 56.084    | 67.400    | 65.719 | 32.0 | 19.1 | 27.9 | 20.0 | 1.1  | 0.6  | -1.1 | 0.6 | 1.2  | 0.3  | -1.2 | 0.2 | 1.1 | 0.4  | 1.4 | 0.07 |
| P000886854 | LOC737605 | bcl-2-associated transcription factor 1-like isoform 2, partial                          | 94.6%  | 1.5    | 1      | 1 | 1       | 9          | 602.734    | 656.531    | 539.433    | 733.972   | 86.145    | 56.084    | 67.400    | 65.719 | 32.0 | 19.1 | 27.9 | 20.0 | 1.1  | 0.6  | -1.1 | 0.6 | 1.2  | 0.3  | -1.2 | 0.2 | 1.1 | 0.4  | 1.4 | 0.07 |
| P000886854 | LOC737605 | bcl-2-associated transcription factor 1-like, partial                                    | 94.6%  | 1.5    | 1      | 1 | 1       | 9          | 602.734    | 656.531    | 539.433    | 733.972   | 86.145    | 56.084    | 67.400    | 65.719 | 32.0 | 19.1 | 27.9 | 20.0 | 1.1  | 0.6  | -1.1 | 0.6 | 1.2  | 0.3  | -1.2 | 0.2 | 1.1 | 0.4  | 1.4 | 0.07 |
| P000006178 | BCLAF1    | isoform 1 of Bcl-2-associated transcription factor 1                                     | 94.6%  | 1.4    | 1      | 1 | 1       | 9          | 602.734    | 656.531    | 539.433    | 733.972   | 86.145    | 56.084    | 67.400    | 65.719 | 32.0 | 19.1 | 27.9 | 20.0 | 1.1  | 0.6  | -1.1 | 0.6 | 1.2  | 0.3  | -1.2 | 0.2 | 1.1 | 0.4  | 1.4 | 0.07 |
| P000006182 | BCLAF1    | isoform 2 of Bcl-2-associated transcription factor 1                                     | 94.6%  | 1.4    | 1      | 1 | 1       | 9          | 602.734    | 656.531    | 539.433    | 733.972   | 86.145    | 56.084    | 67.400    | 65.719 | 32.0 | 19.1 | 27.9 | 20.0 | 1.1  | 0.6  | -1.1 | 0.6 | 1.2  | 0.3  | -1.2 | 0.2 | 1.1 | 0.4  | 1.4 | 0.07 |
| P000006184 | BCLAF1    | isoform 3 of Bcl-2-associated transcription factor 1                                     | 94.6%  | 1.4    | 1      | 1 | 1       | 9          | 602.734    | 656.531    | 539.433    | 733.972   | 86.145    | 56.084    | 67.400    | 65.719 | 32.0 | 19.1 | 27.9 | 20.0 | 1.1  | 0.6  | -1.1 | 0.6 | 1.2  | 0.3  | -1.2 | 0.2 | 1.1 | 0.4  | 1.4 | 0.07 |
| P000979390 | BCLAF1    | Uncharacterized protein                                                                  | 94.6%  | 1.5    | 1      | 1 | 1       | 9          | 602.734    | 656.531    | 539.433    | 733.972   | 86.145    | 56.084    | 67.400    | 65.719 | 32.0 | 19.1 | 27.9 | 20.0 | 1.1  | 0.6  | -1.1 | 0.6 | 1.2  | 0.3  | -1.2 | 0.2 | 1.1 | 0.4  | 1.4 | 0.07 |
| P000979390 | BCLAF1    | Uncharacterized protein                                                                  | 94.6%  | 1.5    | 1      | 1 | 1       | 9          | 602.734    | 656.531    | 539.433    | 733.972   | 86.145    | 56.084    | 67.400    | 65.719 | 32.0 | 19.1 | 27.9 | 20.0 | 1.1  | 0.6  | -1.1 | 0.6 | 1.2  | 0.3  | -1.2 | 0.2 | 1.1 | 0.4  | 1.4 | 0.07 |
| P000979390 | BCLAF1    | Uncharacterized protein                                                                  | 94.6%  | 1.5    | 1      | 1 | 1       | 9          | 602.734    | 656.531    | 539.433    | 733.972   | 86.145    | 56.084    | 67.400    | 65.719 | 32.0 | 19.1 | 27.9 | 20.0 | 1.1  | 0.6  | -1.1 | 0.6 | 1.2  | 0.3  | -1.2 | 0.2 | 1.1 | 0.4  | 1.4 | 0.07 |
| P000979390 | BCLAF1    | Uncharacterized protein                                                                  | 94.6%  | 1.5    | 1      | 1 | 1       | 9          | 602.734    | 656.531    | 539.433    | 733.972   | 86.145    | 56.084    | 67.400    | 65.719 | 32.0 | 19.1 | 27.9 | 20.0 | 1.1  | 0.6  | -1.1 | 0.6 | 1.2  | 0.3  | -1.2 | 0.2 | 1.1 | 0.4  | 1.4 | 0.07 |
| P000979390 | BCLAF1    | Uncharacterized protein                                                                  | 94.6%  | 1.5    | 1      | 1 | 1       | 9          | 602.734    | 656.531    | 539.433    | 733.972   | 86.145    | 56.084    | 67.400    | 65.719 | 32.0 | 19.1 | 27.9 | 20.0 | 1.1  | 0.6  | -1.1 | 0.6 | 1.2  | 0.3  | -1.2 | 0.2 | 1.1 | 0.4  | 1.4 | 0.07 |
| P000979390 | BCLAF1    | Uncharacterized protein                                                                  | 94.6%  | 1.5    | 1      | 1 | 1       | 9          | 602.734    | 656.531    | 539.433    | 733.972   | 86.145    | 56.084    | 67.400    | 65.719 | 32.0 | 19.1 | 27.9 | 20.0 | 1.1  | 0.6  | -1.1 | 0.6 | 1.2  | 0.3  | -1.2 | 0.2 | 1.1 | 0.4  | 1.4 | 0.07 |
| P000979390 | BCLAF1    | Uncharacterized protein                                                                  | 94.6%  | 1.5    | 1      | 1 | 1       | 9          | 602.734    | 656.531    | 539.433    | 733.972   | 86.145    | 56.084    | 67.400    | 65.719 | 32.0 | 19.1 | 27.9 | 20.0 | 1.1  | 0.6  | -1.1 | 0.6 | 1.2  | 0.3  | -1.2 | 0.2 | 1.1 | 0.4  | 1.4 | 0.07 |
| P000979390 | BCLAF1    | Uncharacterized protein                                                                  | 94.6%  | 1.5    | 1      | 1 | 1       | 9          | 602.734    | 656.531    | 539.433    | 733.972   | 86.145    | 56.084    | 67.400    | 65.719 | 32.0 | 19.1 | 27.9 | 20.0 | 1.1  | 0.6  | -1.1 | 0.6 | 1.2  | 0.3  | -1.2 | 0.2 | 1.1 | 0.4  | 1.4 | 0.07 |
| P000979390 | BCLAF1    | Uncharacterized protein                                                                  | 94.6%  | 1.5    | 1      | 1 | 1       | 9          | 602.734    | 656.531    | 539.433    | 733.972   | 86.145    | 56.084    | 67.400    | 65.719 | 32.0 | 19.1 | 27.9 | 20.0 | 1.1  | 0.6  | -1.1 | 0.6 | 1.2  | 0.3  | -1.2 | 0.2 | 1.1 | 0.4  | 1.4 | 0.07 |
| P000979390 | BCLAF1    | Uncharacterized protein                                                                  | 94.6%  | 1.5    | 1      | 1 | 1       | 9          | 602.734    | 656.531    | 539.433    | 733.972   | 86.145    | 56.084    | 67.400    | 65.719 | 32.0 | 19.1 | 27.9 | 20.0 | 1.1  | 0.6  | -1.1 | 0.6 | 1.2  | 0.3  | -1.2 | 0.2 | 1.1 | 0.4  | 1.4 | 0.07 |
| P000979390 | BCLAF1    | Uncharacterized protein                                                                  | 94.6%  | 1.5    | 1      | 1 | 1       | 9          | 602.734    | 656.531    | 539.433    | 733.972   | 86.145    | 56.084    | 67.400    | 65.719 | 32.0 | 19.1 | 27.9 | 20.0 | 1.1  | 0.6  | -1.1 | 0.6 | 1.2  | 0.3  | -1.2 | 0.2 | 1.1 | 0.4  | 1.4 | 0.07 |
| P000979390 | BCLAF1    | Uncharacterized protein                                                                  | 94.6%  | 1.5    | 1      | 1 | 1       | 9          | 602.734    | 656.531    | 539.433    | 733.972   | 86.145    | 56.084    | 67.400    | 65.719 | 32.0 | 19.1 | 27.9 | 20.0 | 1.1  | 0.6  | -1.1 | 0.6 | 1.2  | 0.3  | -1.2 | 0.2 | 1.1 | 0.4  | 1.4 | 0.07 |
| P000979390 | BCLAF1    | Uncharacterized protein                                                                  | 94.6%  | 1.5    | 1      | 1 | 1       | 9          | 602.734    | 656.531    | 539.433    | 733.972   | 86.145    | 56.084    | 67.400    | 65.719 | 32.0 | 19.1 | 27.9 | 20.0 | 1.1  | 0.6  | -1.1 | 0.6 | 1.2  | 0.3  | -1.2 | 0.2 | 1.1 | 0.4  | 1.4 | 0.07 |
| P000979390 | BCLAF1    | Uncharacterized protein                                                                  | 94.6%  | 1.5    | 1      | 1 | 1       | 9          | 602.734    | 656.531    | 539.433    | 733.972   | 86.145    | 56.084    | 67.400    | 65.719 | 32.0 | 19.1 | 27.9 | 20.0 | 1.1  | 0.6  | -1.1 | 0.6 | 1.2  | 0.3  | -1.2 | 0.2 | 1.1 | 0.4  | 1.4 | 0.07 |
| P000979390 | BCLAF1    | Uncharacterized protein                                                                  | 94.6%  | 1.5    | 1      | 1 | 1       | 9          | 602.734    | 656.531    | 539.433    | 733.972   | 86.145    | 56.084    | 67.400    | 65.719 | 32.0 | 19.1 | 27.9 | 20.0 | 1.1  | 0.6  | -1.1 | 0.6 | 1.2  | 0.3  | -1.2 | 0.2 | 1.1 | 0.4  | 1.4 | 0.07 |
| P000979390 | BCLAF1    | Uncharacterized protein                                                                  | 94.6%  | 1.5    | 1      | 1 | 1       | 9          | 602.734    | 656.531    | 539.433    | 733.972   | 86.145    | 56.084    | 67.400    | 65.719 | 32.0 | 19.1 | 27.9 | 20.0 | 1.1  | 0.6  | -1.1 | 0.6 | 1.2  | 0.3  | -1.2 | 0.2 | 1.1 | 0.4  | 1.4 | 0.07 |
| P000979390 | BCLAF1    | Uncharacterized protein                                                                  | 94.6%  | 1.5    | 1      | 1 | 1       | 9          | 602.734    | 656.531    | 539.433    | 733.972   | 86.145    | 56.084    | 67.400    | 65.71  |      |      |      |      |      |      |      |     |      |      |      |     |     |      |     |      |

|            |         |                                                                            |        |      |   |   |   |   |            |            |            |            |           |         |           |         |         |      |      |      |      |      |      |      |     |      |      |      |     |     |     |      |      |     |
|------------|---------|----------------------------------------------------------------------------|--------|------|---|---|---|---|------------|------------|------------|------------|-----------|---------|-----------|---------|---------|------|------|------|------|------|------|------|-----|------|------|------|-----|-----|-----|------|------|-----|
| P00006719  | RD21    | Double-strand break repair protein rad21 homolog                           | 96.9%  | 21   | 1 | 1 | 1 | 1 | 1          | 2,400.00   | 3,005.10   | 2,346.11   | 3,095.10  | 480,539 | 436,216   | 210,538 | 170,413 | 44.8 | 32.5 | 20.1 | 12.3 | 1.3  | 0.4  | -1.0 | 0.9 | 1.3  | 0.2  | -1.3 | 0.2 | 1.0 | 0.9 | 1.3  | 0.02 |     |
| P00006722  | SRNRN40 | dNA FL1.56525, highly similar to WD repeat protein 67                      | 92.9%  | 3    | 1 | 1 | 1 | 1 | 3          | 1,840.827  | 1,782.230  | 1,733.053  | 2,030.203 | 116,125 | 192,466   | 78,009  | 126,996 | 14.1 | 24.2 | 10.1 | 14.0 | -1.0 | 0.8  | -1.1 | 0.5 | 1.1  | 0.3  | -1.0 | 0.8 | 1.1 | 0.3 | 1.2  | 0.08 |     |
| P00006643  | SRNRN40 | WD repeat domain 57 (US snRNP specific), isoform CRA_b                     | 92.9%  | 3    | 1 | 1 | 1 | 1 | 3          | 1,840.827  | 1,782.230  | 1,733.053  | 2,030.203 | 116,125 | 192,466   | 78,009  | 126,996 | 14.1 | 24.2 | 10.1 | 14.0 | -1.0 | 0.8  | -1.1 | 0.5 | 1.1  | 0.3  | -1.0 | 0.8 | 1.1 | 0.3 | 1.2  | 0.08 |     |
| P00006689  | SRNRN40 | US small nuclear ribonucleoprotein 40 kDa protein                          | 92.9%  | 3    | 1 | 1 | 1 | 1 | 3          | 1,840.827  | 1,782.230  | 1,733.053  | 2,030.203 | 116,125 | 192,466   | 78,009  | 126,996 | 14.1 | 24.2 | 10.1 | 14.0 | -1.0 | 0.8  | -1.1 | 0.5 | 1.1  | 0.3  | -1.0 | 0.8 | 1.1 | 0.3 | 1.2  | 0.08 |     |
| P00006723  | DDX23   | Probable ATP-dependent RNA helicase DDX23                                  | 98.1%  | 1    | 1 | 1 | 1 | 2 | 5,395.230  | 5,588.730  | 5,130.365  | 6,297.600  | 403,457   | 271,531 | 388,046   | 364,483 | 16.7    | 10.9 | 16.9 | 12.9 | 1.0  | 0.7  | -1.1 | 0.6  | 1.2 | 0.1  | -1.1 | 0.4  | 1.1 | 0.2 | 1.2 | 0.06 |      |     |
| P00006725  | DDX23   | dNA FL1.46571, highly similar to Probable ATP-dependent RNA helicase DDX23 | 98.1%  | 1    | 1 | 1 | 1 | 2 | 5,395.230  | 5,588.730  | 5,130.365  | 6,297.600  | 403,457   | 271,531 | 388,046   | 364,483 | 16.7    | 10.9 | 16.9 | 12.9 | 1.0  | 0.7  | -1.1 | 0.6  | 1.2 | 0.1  | -1.1 | 0.4  | 1.1 | 0.2 | 1.2 | 0.06 |      |     |
| P00006754  | DCAF7   | DOB1- and CUL4-associated factor 7                                         | 98.9%  | 3    | 1 | 1 | 1 | 3 | 2,140.273  | 2,335.567  | 2,057.733  | 2,423.687  | 231,055   | 65,564  | 216,543   | 156,861 | 24.1    | 6.3  | 23.5 | 14.5 | 1.1  | 0.5  | -1.0 | 0.8  | 1.1 | 0.3  | -1.1 | 0.3  | 1.0 | 0.6 | 1.2 | 0.2  |      |     |
| P00006832  | DCAF7   | dNA FL1.54214, highly similar to WD repeat protein 68                      | 98.9%  | 3    | 1 | 1 | 1 | 3 | 2,140.273  | 2,335.567  | 2,057.733  | 2,423.687  | 231,055   | 65,564  | 216,543   | 156,861 | 24.1    | 6.3  | 23.5 | 14.5 | 1.1  | 0.5  | -1.0 | 0.8  | 1.1 | 0.3  | -1.1 | 0.3  | 1.0 | 0.6 | 1.2 | 0.2  |      |     |
| P00010594  | DCAF7   | Uncharacterized protein                                                    | 98.9%  | 3    | 1 | 1 | 1 | 3 | 2,140.273  | 2,335.567  | 2,057.733  | 2,423.687  | 231,055   | 65,564  | 216,543   | 156,861 | 24.1    | 6.3  | 23.5 | 14.5 | 1.1  | 0.5  | -1.0 | 0.8  | 1.1 | 0.3  | -1.1 | 0.3  | 1.0 | 0.6 | 1.2 | 0.2  |      |     |
| P00006854  | RASL2   | Ras GTPase-activating protein nGAP                                         | 94.4%  | 0.7  | 1 | 1 | 1 | 2 | 3,425.440  | 3,676.766  | 4,117.080  | 4,138.360  | 253,485   | 296,073 | 449,602   | 245,885 | 16.8    | 18.0 | 24.4 | 13.3 | 1.1  | 0.5  | 1.2  | 0.2  | 1.2 | 0.08 | 1.1  | 0.4  | 1.1 | 0.3 | 1.0 | 1.0  | 1    |     |
| P00006861  | RASL2   | cis GTPase-activating protein nGAP isoform 2                               | 94.4%  | 0.7  | 1 | 1 | 1 | 2 | 3,425.440  | 3,676.766  | 4,117.080  | 4,138.360  | 253,485   | 296,073 | 449,602   | 245,885 | 16.8    | 18.0 | 24.4 | 13.3 | 1.1  | 0.5  | 1.2  | 0.2  | 1.2 | 0.08 | 1.1  | 0.4  | 1.1 | 0.3 | 1.0 | 1.0  | 1    |     |
| P00006866  | SEC22B  | Vesicle-trafficking protein SEC22B                                         | 100.0% | 2    | 1 | 3 | 3 | 1 | 22,378.070 | 23,121.350 | 21,403.120 | 24,840.870 | 1,364,903 | 888,509 | 1,716,696 | 687,083 | 13.6    | 8.6  | 17.8 | 6.2  | 1.0  | 0.7  | -1.0 | 0.7  | 1.1 | 0.1  | -1.1 | 0.4  | 1.1 | 0.2 | 1.2 | 0.1  | 2.1  | 0.1 |
| P00006867  | SEC22B  | Uncharacterized protein                                                    | 100.0% | 2    | 1 | 3 | 3 | 1 | 22,378.070 | 23,121.350 | 21,403.120 | 24,840.870 | 1,364,903 | 888,509 | 1,716,696 | 687,083 | 13.6    | 8.6  | 17.8 | 6.2  | 1.0  | 0.7  | -1.0 | 0.7  | 1.1 | 0.1  | -1.1 | 0.4  | 1.1 | 0.2 | 1.2 | 0.1  | 2.1  | 0.1 |
| P00006868  | SEC22B  | Uncharacterized protein                                                    | 100.0% | 2    | 1 | 3 | 3 | 1 | 22,378.070 | 23,121.350 | 21,403.120 | 24,840.870 | 1,364,903 | 888,509 | 1,716,696 | 687,083 | 13.6    | 8.6  | 17.8 | 6.2  | 1.0  | 0.7  | -1.0 | 0.7  | 1.1 | 0.1  | -1.1 | 0.4  | 1.1 | 0.2 | 1.2 | 0.1  | 2.1  | 0.1 |
| P00006869  | SEC22B  | Uncharacterized protein                                                    | 100.0% | 2    | 1 | 3 | 3 | 1 | 22,378.070 | 23,121.350 | 21,403.120 | 24,840.870 | 1,364,903 | 888,509 | 1,716,696 | 687,083 | 13.6    | 8.6  | 17.8 | 6.2  | 1.0  | 0.7  | -1.0 | 0.7  | 1.1 | 0.1  | -1.1 | 0.4  | 1.1 | 0.2 | 1.2 | 0.1  | 2.1  | 0.1 |
| P00006870  | C12orf6 | Probable fructose-2,6-bisphosphatase TIGAR                                 | 99.4%  | 1    | 1 | 1 | 1 | 1 | 1,705.380  | 1,780.970  | 1,519.832  | 1,875.470  | 77,517    | 226,307 | 124,252   | 120,583 | 10.2    | 28.3 | 18.3 | 14.4 | 1.0  | 0.8  | -1.1 | 0.2  | 1.1 | 0.3  | -1.2 | 0.3  | 1.1 | 0.7 | 1.2 | 0.07 |      |     |
| P00006871  | C12orf6 | Uncharacterized protein                                                    | 99.4%  | 1    | 1 | 1 | 1 | 1 | 1,705.380  | 1,780.970  | 1,519.832  | 1,875.470  | 77,517    | 226,307 | 124,252   | 120,583 | 10.2    | 28.3 | 18.3 | 14.4 | 1.0  | 0.8  | -1.1 | 0.2  | 1.1 | 0.3  | -1.2 | 0.3  | 1.1 | 0.7 | 1.2 | 0.07 |      |     |
| P00006872  | C12orf6 | Uncharacterized protein                                                    | 99.4%  | 1    | 1 | 1 | 1 | 1 | 1,705.380  | 1,780.970  | 1,519.832  | 1,875.470  | 77,517    | 226,307 | 124,252   | 120,583 | 10.2    | 28.3 | 18.3 | 14.4 | 1.0  | 0.8  | -1.1 | 0.2  | 1.1 | 0.3  | -1.2 | 0.3  | 1.1 | 0.7 | 1.2 | 0.07 |      |     |
| P00006873  | LUC7L2  | dNA FL1.95988, highly similar to RNA-binding protein Luc7-like 2           | 100.0% | 11.4 | 4 | 5 | 3 | 1 | 1,777.646  | 1,835.187  | 1,710.596  | 1,986.550  | 123,976   | 80,151  | 152,650   | 89,579  | 15.6    | 9.8  | 20.0 | 10.1 | 1.0  | 0.7  | -1.0 | 0.7  | 1.1 | 0.2  | -1.1 | 0.5  | 1.1 | 0.2 | 1.2 | 0.2  |      |     |
| P00006874  | LUC7L2  | dNA FL1.95994, highly similar to RNA-binding protein Luc7-like 2           | 100.0% | 11.4 | 4 | 5 | 3 | 1 | 1,777.646  | 1,835.187  | 1,710.596  | 1,986.550  | 123,976   | 80,151  | 152,650   | 89,579  | 15.6    | 9.8  | 20.0 | 10.1 | 1.0  | 0.7  | -1.0 | 0.7  | 1.1 | 0.2  | -1.1 | 0.5  | 1.1 | 0.2 | 1.2 | 0.2  |      |     |
| P001008748 | LUC7L2  | isoform 2 of Putative RNA-binding protein Luc7-like 2                      | 100.0% | 13.3 | 4 | 4 | 5 | 3 | 1,777.646  | 1,835.187  | 1,710.596  | 1,986.550  | 123,976   | 80,151  | 152,650   | 89,579  | 15.6    | 9.8  | 20.0 | 10.1 | 1.0  | 0.7  | -1.0 | 0.7  | 1.1 | 0.2  | -1.1 | 0.5  | 1.1 | 0.2 | 1.2 | 0.2  |      |     |
| P00006875  | LUC7L2  | Uncharacterized protein                                                    | 100.0% | 13.3 | 4 | 4 | 5 | 3 | 1,777.646  | 1,835.187  | 1,710.596  | 1,986.550  | 123,976   | 80,151  | 152,650   | 89,579  | 15.6    | 9.8  | 20.0 | 10.1 | 1.0  | 0.7  | -1.0 | 0.7  | 1.1 | 0.2  | -1.1 | 0.5  | 1.1 | 0.2 | 1.2 | 0.2  |      |     |
| P00006876  | LUC7L2  | Uncharacterized protein                                                    | 100.0% | 13.3 | 4 | 4 | 5 | 3 | 1,777.646  | 1,835.187  | 1,710.596  | 1,986.550  | 123,976   | 80,151  | 152,650   | 89,579  | 15.6    | 9.8  | 20.0 | 10.1 | 1.0  | 0.7  | -1.0 | 0.7  | 1.1 | 0.2  | -1.1 | 0.5  | 1.1 | 0.2 | 1.2 | 0.2  |      |     |
| P00006877  | LUC7L2  | Uncharacterized protein                                                    | 100.0% | 13.3 | 4 | 4 | 5 | 3 | 1,777.646  | 1,835.187  | 1,710.596  | 1,986.550  | 123,976   | 80,151  | 152,650   | 89,579  | 15.6    | 9.8  | 20.0 | 10.1 | 1.0  | 0.7  | -1.0 | 0.7  | 1.1 | 0.2  | -1.1 | 0.5  | 1.1 | 0.2 | 1.2 | 0.2  |      |     |
| P00006878  | LUC7L2  | Uncharacterized protein                                                    | 100.0% | 13.3 | 4 | 4 | 5 | 3 | 1,777.646  | 1,835.187  | 1,710.596  | 1,986.550  | 123,976   | 80,151  | 152,650   | 89,579  | 15.6    | 9.8  | 20.0 | 10.1 | 1.0  | 0.7  | -1.0 | 0.7  | 1.1 | 0.2  | -1.1 | 0.5  | 1.1 | 0.2 | 1.2 | 0.2  |      |     |
| P00006879  | LUC7L2  | Uncharacterized protein                                                    | 100.0% | 13.3 | 4 | 4 | 5 | 3 | 1,777.646  | 1,835.187  | 1,710.596  | 1,986.550  | 123,976   | 80,151  | 152,650   | 89,579  | 15.6    | 9.8  | 20.0 | 10.1 | 1.0  | 0.7  | -1.0 | 0.7  | 1.1 | 0.2  | -1.1 | 0.5  | 1.1 | 0.2 | 1.2 | 0.2  |      |     |
| P00006880  | LUC7L2  | Uncharacterized protein                                                    | 100.0% | 13.3 | 4 | 4 | 5 | 3 | 1,777.646  | 1,835.187  | 1,710.596  | 1,986.550  | 123,976   | 80,151  | 152,650   | 89,579  | 15.6    | 9.8  | 20.0 | 10.1 | 1.0  | 0.7  | -1.0 | 0.7  | 1.1 | 0.2  | -1.1 | 0.5  | 1.1 | 0.2 | 1.2 | 0.2  |      |     |
| P00006881  | LUC7L2  | Uncharacterized protein                                                    | 100.0% | 13.3 | 4 | 4 | 5 | 3 | 1,777.646  | 1,835.187  | 1,710.596  | 1,986.550  | 123,976   | 80,151  | 152,650   | 89,579  | 15.6    | 9.8  | 20.0 | 10.1 | 1.0  | 0.7  | -1.0 | 0.7  | 1.1 | 0.2  | -1.1 | 0.5  | 1.1 | 0.2 | 1.2 | 0.2  |      |     |
| P00006882  | LUC7L2  | Uncharacterized protein                                                    | 100.0% | 13.3 | 4 | 4 | 5 | 3 | 1,777.646  | 1,835.187  | 1,710.596  | 1,986.550  | 123,976   | 80,151  | 152,650   | 89,579  | 15.6    | 9.8  | 20.0 | 10.1 | 1.0  | 0.7  | -1.0 | 0.7  | 1.1 | 0.2  | -1.1 | 0.5  | 1.1 | 0.2 | 1.2 | 0.2  |      |     |
| P00006883  | LUC7L2  | Uncharacterized protein                                                    | 100.0% | 13.3 | 4 | 4 | 5 | 3 | 1,777.646  | 1,835.187  | 1,710.596  | 1,986.550  | 123,976   | 80,151  | 152,650   | 89,579  | 15.6    | 9.8  | 20.0 | 10.1 | 1.0  | 0.7  | -1.0 | 0.7  | 1.1 | 0.2  | -1.1 | 0.5  | 1.1 | 0.2 | 1.2 | 0.2  |      |     |
| P00006884  | LUC7L2  | Uncharacterized protein                                                    | 100.0% | 13.3 | 4 | 4 | 5 | 3 | 1,777.646  | 1,835.187  | 1,710.596  | 1,986.550  | 123,976   | 80,151  | 152,650   | 89,579  | 15.6    | 9.8  | 20.0 | 10.1 | 1.0  | 0.7  | -1.0 | 0.7  | 1.1 | 0.2  | -1.1 | 0.5  | 1.1 | 0.2 | 1.2 | 0.2  |      |     |
| P00006885  | LUC7L2  | Uncharacterized protein                                                    | 100.0% | 13.3 | 4 | 4 | 5 | 3 | 1,777.646  | 1,835.187  | 1,710.596  | 1,986.550  | 123,976   | 80,151  | 152,650   | 89,579  | 15.6    | 9.8  | 20.0 | 10.1 | 1.0  | 0.7  | -1.0 | 0.7  | 1.1 | 0.2  | -1.1 | 0.5  | 1.1 | 0.2 | 1.2 | 0.2  |      |     |
| P00006886  | LUC7L2  | Uncharacterized protein                                                    | 100.0% | 13.3 | 4 | 4 | 5 | 3 | 1,777.646  | 1,835.187  | 1,710.596  | 1,986.550  | 123,976   | 80,151  | 152,650   | 89,579  | 15.6    | 9.8  | 20.0 | 10.1 | 1.0  | 0.7  | -1.0 | 0.7  | 1.1 | 0.2  | -1.1 | 0.5  | 1.1 | 0.2 | 1.2 | 0.2  |      |     |
| P00006887  | LUC7L2  | Uncharacterized protein                                                    | 100.0% | 13.3 | 4 | 4 | 5 | 3 | 1,777.646  | 1,835.187  | 1,710.596  | 1,986.550  | 123,976   | 80,151  | 152,650   | 89,579  | 15.6    | 9.8  | 20.0 | 10.1 | 1.0  | 0.7  | -1.0 | 0.7  | 1.1 | 0.2  | -1.1 | 0.5  | 1.1 | 0.2 | 1.2 | 0.2  |      |     |
| P00006888  | LUC7L2  | Uncharacterized protein                                                    | 100.0% | 13.3 | 4 | 4 | 5 | 3 | 1,777.646  | 1,835.187  | 1,710.596  | 1,986.550  | 123,976   | 80,151  | 152,650   | 89,579  | 15.6    | 9.8  | 20.0 | 10.1 | 1.0  | 0.7  |      |      |     |      |      |      |     |     |     |      |      |     |

|           |          |                                                                                |        |                            |   |        |    |            |            |            |            |             |           |           |           |           |      |      |      |      |      |      |      |     |      |      |      |      |      |      |      |      |  |  |  |  |  |
|-----------|----------|--------------------------------------------------------------------------------|--------|----------------------------|---|--------|----|------------|------------|------------|------------|-------------|-----------|-----------|-----------|-----------|------|------|------|------|------|------|------|-----|------|------|------|------|------|------|------|------|--|--|--|--|--|
| P00073991 | IP08     | Importin-8 isoform 2                                                           | 100.0% | 1.2                        | 1 | 1      | 1  | 3          | 1,497,658  | 1,538,456  | 1,419,380  | 1,489,190   | 118,356   | 52,790    | 69,455    | 40,980    | 17.7 | 7.7  | 10.9 | 6.2  | 1.0  | 0.8  | -1.1 | 0.6 | -1.0 | 0.9  | -1.1 | 0.2  | -1.0 | 0.5  | 1.0  | 0.4  |  |  |  |  |  |
| P01011377 | IP08     | 59 kDa protein                                                                 | 100.0% | 2.0                        | 1 | 1      | 1  | 3          | 1,497,658  | 1,538,456  | 1,419,380  | 1,489,190   | 118,356   | 52,790    | 69,455    | 40,980    | 17.7 | 7.7  | 10.9 | 6.2  | 1.0  | 0.8  | -1.1 | 0.6 | -1.0 | 0.9  | -1.1 | 0.2  | -1.0 | 0.5  | 1.0  | 0.4  |  |  |  |  |  |
| P00007402 | IP07     | Importin-7                                                                     | 100.0% | 12.2                       | 9 | 11     | 11 | 1          | 33,129,136 | 34,319,820 | 33,675,168 | 36,624,653  | 2,743,662 | 859,979   | 1,594,882 | 796,584   | 18.5 | 5.6  | 10.6 | 4.7  | 1.0  | 0.7  | 1.0  | 0.9 | 1.1  | 0.3  | -1.0 | 0.7  | 1.1  | 0.08 | 1.1  | 0.1  |  |  |  |  |  |
|           |          |                                                                                |        | AFAVGVQVLLK                | 2 | 100.0% | 1  |            |            |            |            |             |           |           |           |           |      |      |      |      |      |      |      |     |      |      |      |      |      |      |      |      |  |  |  |  |  |
|           |          |                                                                                |        | DAQAHMIGSKEILK             | 2 | 81.4%  | 1  |            |            |            |            |             |           |           |           |           |      |      |      |      |      |      |      |     |      |      |      |      |      |      |      |      |  |  |  |  |  |
|           |          |                                                                                |        | DAQAHMIGSKEILK             | 3 | 100.0% | 1  |            |            |            |            |             |           |           |           |           |      |      |      |      |      |      |      |     |      |      |      |      |      |      |      |      |  |  |  |  |  |
|           |          |                                                                                |        | LFERYSGPAAVSK              | 2 | 90.2%  | 1  |            |            |            |            |             |           |           |           |           |      |      |      |      |      |      |      |     |      |      |      |      |      |      |      |      |  |  |  |  |  |
|           |          |                                                                                |        | LLLEVLQCK                  | 2 | 99.9%  | 1  |            |            |            |            |             |           |           |           |           |      |      |      |      |      |      |      |     |      |      |      |      |      |      |      |      |  |  |  |  |  |
|           |          |                                                                                |        | SLQQA LAQDR                | 2 | 99.5%  | 1  |            |            |            |            |             |           |           |           |           |      |      |      |      |      |      |      |     |      |      |      |      |      |      |      |      |  |  |  |  |  |
|           |          |                                                                                |        | SPLVAMQHFPLPLK             | 2 | 89.0%  | 1  |            |            |            |            |             |           |           |           |           |      |      |      |      |      |      |      |     |      |      |      |      |      |      |      |      |  |  |  |  |  |
|           |          |                                                                                |        | SPLVAMQHFPLPLK             | 3 | 88.4%  | 1  |            |            |            |            |             |           |           |           |           |      |      |      |      |      |      |      |     |      |      |      |      |      |      |      |      |  |  |  |  |  |
|           |          |                                                                                |        | YMGFCYQLTERNADPR           | 2 | 82.1%  | 1  |            |            |            |            |             |           |           |           |           |      |      |      |      |      |      |      |     |      |      |      |      |      |      |      |      |  |  |  |  |  |
|           |          |                                                                                |        | VEAMALGLSNDEK              | 2 | 89.3%  | 1  |            |            |            |            |             |           |           |           |           |      |      |      |      |      |      |      |     |      |      |      |      |      |      |      |      |  |  |  |  |  |
|           |          |                                                                                |        | VLTVGSDGSAAMK              | 2 | 85.6%  | 1  |            |            |            |            |             |           |           |           |           |      |      |      |      |      |      |      |     |      |      |      |      |      |      |      |      |  |  |  |  |  |
| P00007423 | ANP32B   | isoform 1 of Acidic leucine-rich nuclear phosphoprotein 32 family member B     | 100.0% | 11.6                       | 2 | 3      | 4  | 2          | 4,054,730  | 3,218,222  | 3,994,975  | 3,997,505   | 247,632   | 200,707   | 292,695   | 270,717   | 13.7 | 14.0 | 16.4 | 15.1 | -1.3 | 0.03 | -1.0 | 0.9 | -1.0 | 0.9  | 1.2  | 0.06 | 1.2  | 0.05 | 1.0  | 1    |  |  |  |  |  |
| P00075924 | ANP32B   | isoform 2 of Acidic leucine-rich nuclear phosphoprotein 32 family member B     | 100.0% | 14.9                       | 2 | 3      | 4  | 2          | 4,054,730  | 3,218,222  | 3,994,975  | 3,997,505   | 247,632   | 200,707   | 292,695   | 270,717   | 13.7 | 14.0 | 16.4 | 15.1 | -1.3 | 0.03 | -1.0 | 0.9 | -1.0 | 0.9  | 1.2  | 0.06 | 1.2  | 0.05 | 1.0  | 1    |  |  |  |  |  |
|           |          |                                                                                |        | LNRLNLSLSSK                | 2 | 100.0% | 1  |            |            |            |            |             |           |           |           |           |      |      |      |      |      |      |      |     |      |      |      |      |      |      |      |      |  |  |  |  |  |
|           |          |                                                                                |        | SLDLNCEVYTNNDYR            | 2 | 100.0% | 2  |            |            |            |            |             |           |           |           |           |      |      |      |      |      |      |      |     |      |      |      |      |      |      |      |      |  |  |  |  |  |
|           |          |                                                                                |        | SLDLNCEVYTNNDYR            | 3 | 100.0% | 1  |            |            |            |            |             |           |           |           |           |      |      |      |      |      |      |      |     |      |      |      |      |      |      |      |      |  |  |  |  |  |
| P00007428 | ARL6P5   | PRK1 family protein 3                                                          | 100.0% | 16.0                       | 2 | 2      | 2  | 2          | 4,351,757  | 4,271,081  | 4,176,193  | 5,158,738   | 455,540   | 303,503   | 320,737   | 308,337   | 23.4 | 15.9 | 17.2 | 13.4 | -1.0 | 0.9  | -1.0 | 0.8 | 1.2  | 0.2  | -1.0 | 0.8  | 1.2  | 0.07 | 1.2  | 0.06 |  |  |  |  |  |
| P00090699 | ARL6P5   | Uncharacterized protein                                                        | 100.0% | 18.1                       | 2 | 2      | 2  | 2          | 4,351,757  | 4,271,081  | 4,176,193  | 5,158,738   | 455,540   | 303,503   | 320,737   | 308,337   | 23.4 | 15.9 | 17.2 | 13.4 | -1.0 | 0.9  | -1.0 | 0.8 | 1.2  | 0.2  | -1.0 | 0.8  | 1.2  | 0.07 | 1.2  | 0.06 |  |  |  |  |  |
|           |          |                                                                                |        | AWDQFFPGSDR                | 2 | 99.9%  | 1  |            |            |            |            |             |           |           |           |           |      |      |      |      |      |      |      |     |      |      |      |      |      |      |      |      |  |  |  |  |  |
|           |          |                                                                                |        | TRMSEVLANEQEGEGRK          | 2 | 100.0% | 1  |            |            |            |            |             |           |           |           |           |      |      |      |      |      |      |      |     |      |      |      |      |      |      |      |      |  |  |  |  |  |
| P00007427 | AGR2     | AGR2                                                                           | 100.0% | 47.2                       | 9 | 14     | 26 | 2          | 99,646,896 | 91,150,880 | 94,589,700 | 112,862,392 | 8,658,123 | 3,825,908 | 7,842,096 | 6,337,779 | 19.4 | 9.4  | 18.5 | 12.6 | -1.1 | 0.4  | -1.1 | 0.7 | 1.1  | 0.3  | 1.0  | 0.7  | 1.2  | 0.02 | 1.2  | 0.1  |  |  |  |  |  |
| P00042032 | AGR2     | Anterior gradient protein 2 homolog                                            | 100.0% | 52.6                       | 9 | 14     | 26 | 2          | 99,646,896 | 91,150,880 | 94,589,700 | 112,862,392 | 8,658,123 | 3,825,908 | 7,842,096 | 6,337,779 | 19.4 | 9.4  | 18.5 | 12.6 | -1.1 | 0.4  | -1.1 | 0.7 | 1.1  | 0.3  | 1.0  | 0.7  | 1.2  | 0.02 | 1.2  | 0.1  |  |  |  |  |  |
|           |          |                                                                                |        | GWGDDWVYQTEALYK            | 2 | 100.0% | 4  |            |            |            |            |             |           |           |           |           |      |      |      |      |      |      |      |     |      |      |      |      |      |      |      |      |  |  |  |  |  |
|           |          |                                                                                |        | GWGDDWVYQTEALYK            | 3 | 100.0% | 2  |            |            |            |            |             |           |           |           |           |      |      |      |      |      |      |      |     |      |      |      |      |      |      |      |      |  |  |  |  |  |
|           |          |                                                                                |        | HLSPDQGYVPR                | 2 | 100.0% | 1  |            |            |            |            |             |           |           |           |           |      |      |      |      |      |      |      |     |      |      |      |      |      |      |      |      |  |  |  |  |  |
|           |          |                                                                                |        | IMFVDSLYR                  | 1 | 84.6%  | 1  |            |            |            |            |             |           |           |           |           |      |      |      |      |      |      |      |     |      |      |      |      |      |      |      |      |  |  |  |  |  |
|           |          |                                                                                |        | IMFVDSLYR                  | 2 | 100.0% | 2  |            |            |            |            |             |           |           |           |           |      |      |      |      |      |      |      |     |      |      |      |      |      |      |      |      |  |  |  |  |  |
|           |          |                                                                                |        | LAQFVLLNLYVETDK            | 2 | 100.0% | 2  |            |            |            |            |             |           |           |           |           |      |      |      |      |      |      |      |     |      |      |      |      |      |      |      |      |  |  |  |  |  |
|           |          |                                                                                |        | LAQFVLLNLYVETDK            | 3 | 100.0% | 2  |            |            |            |            |             |           |           |           |           |      |      |      |      |      |      |      |     |      |      |      |      |      |      |      |      |  |  |  |  |  |
|           |          |                                                                                |        | LAQFVLLNLYVETDKSLSPDQGYVPR | 3 | 100.0% | 2  |            |            |            |            |             |           |           |           |           |      |      |      |      |      |      |      |     |      |      |      |      |      |      |      |      |  |  |  |  |  |
|           |          |                                                                                |        | LPQTLR                     | 1 | 99.2%  | 1  |            |            |            |            |             |           |           |           |           |      |      |      |      |      |      |      |     |      |      |      |      |      |      |      |      |  |  |  |  |  |
|           |          |                                                                                |        | LPQTLR                     | 2 | 91.6%  | 1  |            |            |            |            |             |           |           |           |           |      |      |      |      |      |      |      |     |      |      |      |      |      |      |      |      |  |  |  |  |  |
|           |          |                                                                                |        | LYAVEPADTALLDNMK           | 3 | 100.0% | 2  |            |            |            |            |             |           |           |           |           |      |      |      |      |      |      |      |     |      |      |      |      |      |      |      |      |  |  |  |  |  |
|           |          |                                                                                |        | LYAVEPADTALLDNMK           | 2 | 100.0% | 2  |            |            |            |            |             |           |           |           |           |      |      |      |      |      |      |      |     |      |      |      |      |      |      |      |      |  |  |  |  |  |
|           |          |                                                                                |        | LYAVEPADTALLDNMK           | 3 | 100.0% | 2  |            |            |            |            |             |           |           |           |           |      |      |      |      |      |      |      |     |      |      |      |      |      |      |      |      |  |  |  |  |  |
| P00007611 | ATP5O    | ATP synthase subunit O, mitochondrial                                          | 100.0% | 23.5                       | 4 | 5      | 5  | 1          | 22,322,048 | 22,565,445 | 22,412,415 | 25,819,129  | 1,644,380 | 477,942   | 1,691,920 | 939,749   | 16.5 | 4.7  | 16.5 | 8.1  | 1.0  | 0.9  | 1.0  | 1   | 1.2  | 0.1  | -1.0 | 0.9  | 1.1  | 0.01 | 1.2  | 0.1  |  |  |  |  |  |
|           |          |                                                                                |        | FSPLTINLNLLENGR            | 2 | 100.0% | 1  |            |            |            |            |             |           |           |           |           |      |      |      |      |      |      |      |     |      |      |      |      |      |      |      |      |  |  |  |  |  |
|           |          |                                                                                |        | FSPLTINLNLLENGR            | 3 | 99.9%  | 1  |            |            |            |            |             |           |           |           |           |      |      |      |      |      |      |      |     |      |      |      |      |      |      |      |      |  |  |  |  |  |
|           |          |                                                                                |        | SPLSDQGVK                  | 2 | 95.3%  | 1  |            |            |            |            |             |           |           |           |           |      |      |      |      |      |      |      |     |      |      |      |      |      |      |      |      |  |  |  |  |  |
|           |          |                                                                                |        | TPSGLCGAAVYK               | 2 | 100.0% | 1  |            |            |            |            |             |           |           |           |           |      |      |      |      |      |      |      |     |      |      |      |      |      |      |      |      |  |  |  |  |  |
|           |          |                                                                                |        | VAASVLPYVYK                | 2 | 97.7%  | 1  |            |            |            |            |             |           |           |           |           |      |      |      |      |      |      |      |     |      |      |      |      |      |      |      |      |  |  |  |  |  |
| P00007673 | CHCHD2   | Coiled-coil-helix-coiled-coil-helix domain-containing protein 2, mitochondrial | 100.0% | 3.1                        | 3 | 3      | 1  | 20,199,179 | 21,217,316 | 19,958,078 | 23,380,539 | 1,122,253   | 1,011,253 | 1,070,515 | 1,273,483 | 12.4      | 10.7 | 12.2 | 12.2 | 1.1  | 0.6  | -1.0 | 0.7  | 1.2 | 0.1  | -1.1 | 0.3  | 1.1  | 0.2  | 1.2  | 0.05 |      |  |  |  |  |  |
|           |          |                                                                                |        | AARPPAVIADPAAAPPSAVSSAAAPR | 3 | 100.0% | 1  |            |            |            |            |             |           |           |           |           |      |      |      |      |      |      |      |     |      |      |      |      |      |      |      |      |  |  |  |  |  |
|           |          |                                                                                |        | LOEGFNEVLK                 | 2 | 81.2%  | 1  |            |            |            |            |             |           |           |           |           |      |      |      |      |      |      |      |     |      |      |      |      |      |      |      |      |  |  |  |  |  |
| P00007678 | HSD17B12 | Estradiol 17-beta-dehydrogenase 12                                             | 93.9%  | 4.9                        | 1 | 1      | 1  | 1,355,470  | 1,552,055  | 1,611,000  | 1,608,460  | 137,044     | 285,602   | 212,802   | 166,533   | 22.6      | 41.2 | 29.4 | 23.2 | 1.1  | 0.6  | 1.2  | 0.3  | 1.2 | 0.3  | 1.0  | 0.9  | 1.0  | 0.9  | -1.0 | 1    |      |  |  |  |  |  |
|           |          |                                                                                |        | TFVDFSSQMEHYR              | 2 | 93.9%  | 1  |            |            |            |            |             |           |           |           |           |      |      |      |      |      |      |      |     |      |      |      |      |      |      |      |      |  |  |  |  |  |
| P00007686 | ATP5V1A  | V-type proton ATPase catalytic subunit A                                       | 100.0% | 6.8                        | 4 | 4      | 5  | 2          | 3,994,975  | 4,456,217  | 4,512,711  | 4,507,140   | 230,714   | 192,184   | 386,698   | 192,734   | 12.9 | 9.6  | 19.2 | 6.6  | 1.1  | 0.2  | 1.1  | 0.3 | 1.1  | 0.08 | 1.0  | 0.9  |      |      |      |      |  |  |  |  |  |





| Accession | Gene         | Protein                                                                            | Function            | 100%   | 95%    | 90% | 85% | 80% | 75%        | 70%        | 65%        | 60%        | 55%        | 50%       | 45%       | 40%       | 35%       | 30%  | 25%  | 20%  | 15%  | 10%  | 5%   | 0%   |      |      |      |      |      |      |      |       |     |  |  |  |
|-----------|--------------|------------------------------------------------------------------------------------|---------------------|--------|--------|-----|-----|-----|------------|------------|------------|------------|------------|-----------|-----------|-----------|-----------|------|------|------|------|------|------|------|------|------|------|------|------|------|------|-------|-----|--|--|--|
| P00000    |              |                                                                                    | NATVEQMTMAAEK       | 2      | 100.0% | 2   |     |     |            |            |            |            |            |           |           |           |           |      |      |      |      |      |      |      |      |      |      |      |      |      |      |       |     |  |  |  |
| P00000    |              |                                                                                    | QWLEGR              | 2      | 95.3%  | 1   |     |     |            |            |            |            |            |           |           |           |           |      |      |      |      |      |      |      |      |      |      |      |      |      |      |       |     |  |  |  |
| P0000896  | ALDH1B1      | isomom Long of Delta-1-pyrone-5-carboxylate synthase                               |                     | 100.0% | 10     | 10  | 12  | 2   | 64,304,648 | 66,987,972 | 68,484,189 | 70,304,542 | 6,071,546  | 2,884,111 | 5,488,216 | 2,948,763 | 21.1      | 9.6  | 18.0 | 8.6  | 1.0  | 0.7  | 1.1  | 0.6  | 1.2  | 0.1  | 1.0  | 0.8  | 1.1  | 0.05 | 1.1  | 0.2   |     |  |  |  |
| P00018547 | ALDH1B1      | isomom Short of Delta-1-pyrone-5-carboxylate synthase                              |                     | 100.0% | 15.3   | 10  | 10  | 12  | 2          | 64,304,648 | 66,987,972 | 68,484,189 | 70,304,542 | 6,071,546 | 2,884,111 | 5,488,216 | 2,948,763 | 21.1 | 9.6  | 18.0 | 8.6  | 1.0  | 0.7  | 1.1  | 0.6  | 1.2  | 0.1  | 1.0  | 0.8  | 1.1  | 0.05 | 1.1   | 0.2 |  |  |  |
|           |              |                                                                                    | FASVLTFSPEVK        | 2      | 100.0% | 2   |     |     |            |            |            |            |            |           |           |           |           |      |      |      |      |      |      |      |      |      |      |      |      |      |      |       |     |  |  |  |
|           |              |                                                                                    | QKQKALGK            | 2      | 99.3%  | 1   |     |     |            |            |            |            |            |           |           |           |           |      |      |      |      |      |      |      |      |      |      |      |      |      |      |       |     |  |  |  |
|           |              |                                                                                    | ILKLLYQALSRIVK      | 3      | 95.3%  | 1   |     |     |            |            |            |            |            |           |           |           |           |      |      |      |      |      |      |      |      |      |      |      |      |      |      |       |     |  |  |  |
|           |              |                                                                                    | LASIVEGVLVNGDGR     | 2      | 100.0% | 1   |     |     |            |            |            |            |            |           |           |           |           |      |      |      |      |      |      |      |      |      |      |      |      |      |      |       |     |  |  |  |
|           |              |                                                                                    | MDLQPR              | 2      | 99.9%  | 1   |     |     |            |            |            |            |            |           |           |           |           |      |      |      |      |      |      |      |      |      |      |      |      |      |      |       |     |  |  |  |
|           |              |                                                                                    | MILTPEPR            | 2      | 98.3%  | 1   |     |     |            |            |            |            |            |           |           |           |           |      |      |      |      |      |      |      |      |      |      |      |      |      |      |       |     |  |  |  |
|           |              |                                                                                    | NLNGTLLHLLR         | 2      | 88.0%  | 1   |     |     |            |            |            |            |            |           |           |           |           |      |      |      |      |      |      |      |      |      |      |      |      |      |      |       |     |  |  |  |
|           |              |                                                                                    | QAKASSGGDGR         | 2      | 100.0% | 2   |     |     |            |            |            |            |            |           |           |           |           |      |      |      |      |      |      |      |      |      |      |      |      |      |      |       |     |  |  |  |
|           |              |                                                                                    | YLFQDIDMLR          | 2      | 100.0% | 2   |     |     |            |            |            |            |            |           |           |           |           |      |      |      |      |      |      |      |      |      |      |      |      |      |      |       |     |  |  |  |
|           |              |                                                                                    | VSGHWTDVEGK         | 2      | 100.0% | 1   |     |     |            |            |            |            |            |           |           |           |           |      |      |      |      |      |      |      |      |      |      |      |      |      |      |       |     |  |  |  |
| P0000899  | DR1          | Protein DR1                                                                        |                     | 99.2%  | 2      | 2   | 2   | 1   | 3,016,755  | 2,863,788  | 3,351,199  | 3,847,538  | 290,621    | 203,703   | 433,264   | 229,842   | 21.8      | 10.9 | 28.9 | 13.4 | -1.1 | 0.7  | 1.1  | 0.5  | 1.3  | 0.6  | 1.2  | 0.3  | 1.3  | 0.01 | 1.1  | 0.3   |     |  |  |  |
|           |              |                                                                                    | LENLGFPEELLR        | 2      | 97.6%  | 1   |     |     |            |            |            |            |            |           |           |           |           |      |      |      |      |      |      |      |      |      |      |      |      |      |      |       |     |  |  |  |
|           |              |                                                                                    | TSPEHWKALSGFYSSEVSK | 3      | 97.7%  | 1   |     |     |            |            |            |            |            |           |           |           |           |      |      |      |      |      |      |      |      |      |      |      |      |      |      |       |     |  |  |  |
| P0000804  | LOC102914605 | 3-hydroxyacyl-CoA dehydrogenase 3-like isoform 1                                   |                     | 97.9%  | 1      | 1   | 1   | 3   | 614,059    | 601,989    | 783,293    | 568,767    | 79,577     | 62,497    | 56,435    | 23,904    | 29.0      | 23.2 | 16.8 | 9.4  | -1.0 | 0.9  | 1.3  | 0.1  | -1.1 | 0.6  | 1.3  | 0.06 | -1.1 | 0.6  | -1.4 | 0.007 |     |  |  |  |
| P0000899  | PTPLAD1      | 3-hydroxyacyl-CoA dehydrogenase 3                                                  |                     | 97.9%  | 5.8    | 1   | 1   | 3   | 614,059    | 601,989    | 783,293    | 568,767    | 79,577     | 62,497    | 56,435    | 23,904    | 29.0      | 23.2 | 16.8 | 9.4  | -1.0 | 0.9  | 1.3  | 0.1  | -1.1 | 0.6  | 1.3  | 0.06 | -1.1 | 0.6  | -1.4 | 0.007 |     |  |  |  |
| P0007433  | PTPLAD1      | cDNA FLJ54138, highly similar to Homo sapiens butyrate-induced transcribed 1 (HSP) |                     | 97.9%  | 6.8    | 1   | 1   | 3   | 614,059    | 601,989    | 783,293    | 568,767    | 79,577     | 62,497    | 56,435    | 23,904    | 29.0      | 23.2 | 16.8 | 9.4  | -1.0 | 0.9  | 1.3  | 0.1  | -1.1 | 0.6  | 1.3  | 0.06 | -1.1 | 0.6  | -1.4 | 0.007 |     |  |  |  |
|           |              |                                                                                    | VELSDVQVSRHSTVNLHFK | 3      | 97.9%  | 1   |     |     |            |            |            |            |            |           |           |           |           |      |      |      |      |      |      |      |      |      |      |      |      |      |      |       |     |  |  |  |
| P00009010 | TRMT12       | RNA methyltransferase 12 homolog                                                   |                     | 100.0% | 21.6   | 2   | 2   | 2   | 4,390,335  | 4,189,888  | 4,337,430  | 4,999,547  | 349,590    | 215,083   | 250,041   | 196,433   | 17.8      | 11.5 | 13.2 | 8.7  | -1.0 | 0.6  | -1.0 | 0.9  | 1.1  | 0.2  | 1.0  | 0.7  | 1.2  | 0.02 | 1.2  | 0.07  |     |  |  |  |
| P0101481  | TRMT12       | 12 kDa protein                                                                     |                     | 100.0% | 25.5   | 2   | 2   | 2   | 4,390,335  | 4,189,888  | 4,337,430  | 4,999,547  | 349,590    | 215,083   | 250,041   | 196,433   | 17.8      | 11.5 | 13.2 | 8.7  | -1.0 | 0.6  | -1.0 | 0.9  | 1.1  | 0.2  | 1.0  | 0.7  | 1.2  | 0.02 | 1.2  | 0.07  |     |  |  |  |
|           |              |                                                                                    | ICPVENRIVR          | 2      | 100.0% | 1   |     |     |            |            |            |            |            |           |           |           |           |      |      |      |      |      |      |      |      |      |      |      |      |      |      |       |     |  |  |  |
|           |              |                                                                                    | VEVSAFLAALDNLK      | 2      | 99.9%  | 1   |     |     |            |            |            |            |            |           |           |           |           |      |      |      |      |      |      |      |      |      |      |      |      |      |      |       |     |  |  |  |
| P00009032 | LAMP2        | isomom LAMP-2A of Lysosome-associated membrane glycoprotein 2                      |                     | 98.7%  | 2.0    | 1   | 1   | 5   | 726,508    | 691,798    | 641,842    | 847,614    | 51,988     | 51,987    | 86,524    | 39,784    | 16.0      | 16.8 | 30.1 | 10.5 | -1.1 | 0.6  | -1.1 | 0.4  | 1.2  | 0.1  | -1.1 | 0.6  | 1.2  | 0.04 | 1.3  | 0.06  |     |  |  |  |
| P00021817 | LAMP2        | lysosome-associated membrane glycoprotein 2 isoform C (precursor)                  |                     | 98.7%  | 2.0    | 1   | 1   | 5   | 726,508    | 691,798    | 641,842    | 847,614    | 51,988     | 51,987    | 86,524    | 39,784    | 16.0      | 16.8 | 30.1 | 10.5 | -1.1 | 0.6  | -1.1 | 0.4  | 1.2  | 0.1  | -1.1 | 0.6  | 1.2  | 0.04 | 1.3  | 0.06  |     |  |  |  |
| P00073827 | LAMP2        | isomom LAMP-2B of Lysosome-associated membrane glycoprotein 2                      |                     | 98.7%  | 2.0    | 1   | 1   | 5   | 726,508    | 691,798    | 641,842    | 847,614    | 51,988     | 51,987    | 86,524    | 39,784    | 16.0      | 16.8 | 30.1 | 10.5 | -1.1 | 0.6  | -1.1 | 0.4  | 1.2  | 0.1  | -1.1 | 0.6  | 1.2  | 0.04 | 1.3  | 0.06  |     |  |  |  |
| P00092244 | LAMP2        | cDNA FLJ52540, highly similar to Lysosome-associated membrane glycoprotein 2       |                     | 98.7%  | 2.7    | 1   | 1   | 5   | 726,508    | 691,798    | 641,842    | 847,614    | 51,988     | 51,987    | 86,524    | 39,784    | 16.0      | 16.8 | 30.1 | 10.5 | -1.1 | 0.6  | -1.1 | 0.4  | 1.2  | 0.1  | -1.1 | 0.6  | 1.2  | 0.04 | 1.3  | 0.06  |     |  |  |  |
| P00060988 | LAMP2        | cDNA FLJ58760, highly similar to Homo sapiens lysosome-associated membrane 2       |                     | 98.7%  | 2.7    | 1   | 1   | 5   | 726,508    | 691,798    | 641,842    | 847,614    | 51,988     | 51,987    | 86,524    | 39,784    | 16.0      | 16.8 | 30.1 | 10.5 | -1.1 | 0.6  | -1.1 | 0.4  | 1.2  | 0.1  | -1.1 | 0.6  | 1.2  | 0.04 | 1.3  | 0.06  |     |  |  |  |
| P00009032 | SSB          | Lupus La protein                                                                   |                     | 100.0% | 25.7   | 2   | 11  | 15  | 2          | 23,225,051 | 23,227,449 | 23,927,414 | 25,424,820 | 2,009,002 | 1,688,718 | 2,013,607 | 704,370   | 19.3 | 16.1 | 18.8 | 6.2  | -1.0 | 1.0  | 0.8  | 1.1  | 0.3  | 1.0  | 0.8  | 1.1  | 0.3  | 1.1  | 0.5   |     |  |  |  |
| P00018602 | SSB          | Uncharacterized protein                                                            |                     | 100.0% | 29.1   | 9   | 11  | 15  | 2          | 23,225,051 | 23,227,449 | 23,927,414 | 25,424,820 | 2,009,002 | 1,688,718 | 2,013,607 | 704,370   | 19.3 | 16.1 | 18.8 | 6.2  | -1.0 | 1.0  | 0.8  | 1.1  | 0.3  | 1.0  | 0.8  | 1.1  | 0.3  | 1.1  | 0.5   |     |  |  |  |
|           |              |                                                                                    | EOKLDEGVWPLEMIK     | 2      | 98.9%  | 1   |     |     |            |            |            |            |            |           |           |           |           |      |      |      |      |      |      |      |      |      |      |      |      |      |      |       |     |  |  |  |
|           |              |                                                                                    | EOKLDEGVWPLEMIK     | 3      | 99.4%  | 1   |     |     |            |            |            |            |            |           |           |           |           |      |      |      |      |      |      |      |      |      |      |      |      |      |      |       |     |  |  |  |
|           |              |                                                                                    | GVKQDNR             | 2      | 98.2%  | 1   |     |     |            |            |            |            |            |           |           |           |           |      |      |      |      |      |      |      |      |      |      |      |      |      |      |       |     |  |  |  |
|           |              |                                                                                    | GSFVVFDSIESAK       | 2      | 100.0% | 2   |     |     |            |            |            |            |            |           |           |           |           |      |      |      |      |      |      |      |      |      |      |      |      |      |      |       |     |  |  |  |
|           |              |                                                                                    | ICHQIEVYFGDNLPR     | 2      | 100.0% | 1   |     |     |            |            |            |            |            |           |           |           |           |      |      |      |      |      |      |      |      |      |      |      |      |      |      |       |     |  |  |  |
|           |              |                                                                                    | ICHQIEVYFGDNLPR     | 3      | 99.6%  | 1   |     |     |            |            |            |            |            |           |           |           |           |      |      |      |      |      |      |      |      |      |      |      |      |      |      |       |     |  |  |  |
|           |              |                                                                                    | IEDQQLSNAK          | 2      | 100.0% | 2   |     |     |            |            |            |            |            |           |           |           |           |      |      |      |      |      |      |      |      |      |      |      |      |      |      |       |     |  |  |  |
|           |              |                                                                                    | LDKGVWVLEMIK        | 2      | 100.0% | 2   |     |     |            |            |            |            |            |           |           |           |           |      |      |      |      |      |      |      |      |      |      |      |      |      |      |       |     |  |  |  |
|           |              |                                                                                    | LTTPQVIVLEAK        | 2      | 100.0% | 2   |     |     |            |            |            |            |            |           |           |           |           |      |      |      |      |      |      |      |      |      |      |      |      |      |      |       |     |  |  |  |
|           |              |                                                                                    | SPSKPLPEVDEKVNQVK   | 3      | 100.0% | 1   |     |     |            |            |            |            |            |           |           |           |           |      |      |      |      |      |      |      |      |      |      |      |      |      |      |       |     |  |  |  |
|           |              |                                                                                    | WDRVQ               | 2      | 93.0%  | 1   |     |     |            |            |            |            |            |           |           |           |           |      |      |      |      |      |      |      |      |      |      |      |      |      |      |       |     |  |  |  |
| P00009054 | BMP1         | isomom BMP-1-3 of Bone morphogenetic protein 1                                     |                     | 91.6%  | 1.6    | 1   | 1   | 1   | 8          | 626,865    | 622,574    | 731,611    | 797,943    | 55,589    | 50,333    | 54,135    | 45,841    | 15.0 | 13.7 | 16.6 | 12.9 | -1.0 | 1    | -1.3 | 0.3  | -1.0 | 0.7  | -1.1 | 0.3  | -1.0 | 0.7  | 1.1   | 0.4 |  |  |  |
| P00014021 | BMP1         | isomom BMP-1-4 of Bone morphogenetic protein 1                                     |                     | 91.6%  | 0.8    | 1   | 1   | 1   | 8          | 626,865    | 622,574    | 731,611    | 797,943    | 55,589    | 50,333    | 54,135    | 45,841    | 15.0 | 13.7 | 16.6 | 12.9 | -1.0 | 1    | -1.1 | 0.3  | -1.0 | 0.7  | -1.1 | 0.3  | -1.0 | 0.7  | 1.1   | 0.4 |  |  |  |
| P00018043 | BMP1         | isomom BMP-1-5 of Bone morphogenetic protein 1                                     |                     | 91.6%  | 2.0    | 1   | 1   | 1   | 8          | 626,865    | 622,574    | 731,611    | 797,943    | 55,589    | 50,333    | 54,135    | 45,841    | 15.0 | 13.7 | 16.6 | 12.9 | -1.0 | 1    | -1.1 | 0.3  | -1.0 | 0.7  | -1.1 | 0.3  | -1.0 | 0.7  | 1.1   | 0.4 |  |  |  |
| P00018044 | BMP1         | isomom BMP-1-6 of Bone morphogenetic protein 1                                     | </                  |        |        |     |     |     |            |            |            |            |            |           |           |           |           |      |      |      |      |      |      |      |      |      |      |      |      |      |      |       |     |  |  |  |







|            |       |                                              |        |       |    |      |    |            |            |            |            |            |            |           |           |           |         |      |      |      |      |      |      |      |     |      |      |     |     |     |      |      |  |  |  |
|------------|-------|----------------------------------------------|--------|-------|----|------|----|------------|------------|------------|------------|------------|------------|-----------|-----------|-----------|---------|------|------|------|------|------|------|------|-----|------|------|-----|-----|-----|------|------|--|--|--|
| P00010120  | CTBP2 | isoform 1 of C-terminal-binding protein 2    | 100.0% | 4.6   | 2  | 2    | 2  | 1,835,628  | 2,004,162  | 1,787,046  | 2,184,570  | 182,948    | 94,457     | 138,737   | 126,350   | 22.3      | 10.5    | 17.4 | 12.9 | 1.1  | 0.4  | -1.0 | 0.8  | 1.2  | 0.2 | -1.1 | 0.2  | 1.1 | 0.3 | 1.2 | 0.07 |      |  |  |  |
| P00047508  | CTBP2 | C-terminal binding protein 2                 | 100.0% | 4.6   | 2  | 2    | 2  | 1,835,628  | 2,004,162  | 1,787,046  | 2,184,570  | 182,948    | 94,457     | 138,737   | 126,350   | 22.3      | 10.5    | 17.4 | 12.9 | 1.1  | 0.4  | -1.0 | 0.8  | 1.2  | 0.2 | -1.1 | 0.2  | 1.1 | 0.3 | 1.2 | 0.07 |      |  |  |  |
|            |       | IGSYGVNIVK                                   |        | 2     | 2  | 2    | 2  |            |            |            |            |            |            |           |           |           |         |      |      |      |      |      |      |      |     |      |      |     |     |     |      |      |  |  |  |
|            |       | PLVALLDR                                     |        | 2     | 2  | 2    | 2  |            |            |            |            |            |            |           |           |           |         |      |      |      |      |      |      |      |     |      |      |     |     |     |      |      |  |  |  |
| P00010136  | CTBP2 | isoform 2 of C-terminal-binding protein 2    | 100.0% | 99.9% | 1  | 1    | 1  | 10,449,898 | 10,507,512 | 10,006,156 | 11,232,990 | 692,484    | 1,036,937  | 516,422   | 729,485   | 14.8      | 22.1    | 11.9 | 14.5 | 1.0  | 1    | -1.0 | 0.6  | 1.1  | 0.5 | -1.1 | 0.7  | 1.1 | 0.6 | 1.1 | 0.2  |      |  |  |  |
|            |       | IGSYGVNIVK                                   |        | 3     | 3  | 3    | 3  |            |            |            |            |            |            |           |           |           |         |      |      |      |      |      |      |      |     |      |      |     |     |     |      |      |  |  |  |
|            |       | PLVALLDR                                     |        | 2     | 2  | 2    | 2  |            |            |            |            |            |            |           |           |           |         |      |      |      |      |      |      |      |     |      |      |     |     |     |      |      |  |  |  |
|            |       | TVLPELAFR                                    |        | 2     | 2  | 2    | 2  |            |            |            |            |            |            |           |           |           |         |      |      |      |      |      |      |      |     |      |      |     |     |     |      |      |  |  |  |
| P00010141  | PCLE3 | DNA polymerase epsilon subunit 3             | 99.5%  | 12.2  | 1  | 1    | 1  | 2,966,793  | 3,001,595  | 3,119,144  | 3,262,127  | 252,136    | 141,176    | 175,817   | 153,710   | 19.0      | 10.5    | 12.6 | 10.5 | 1.0  | 0.9  | 1.1  | 0.6  | 1.1  | 0.3 | 1.0  | 0.6  | 1.1 | 0.2 | 1.0 | 0.6  |      |  |  |  |
|            |       | TLNLSADVLSAMEEMEFQR                          |        | 2     | 2  | 2    | 2  |            |            |            |            |            |            |           |           |           |         |      |      |      |      |      |      |      |     |      |      |     |     |     |      |      |  |  |  |
|            |       | TLNLSADVLSAMEEMEFQR                          |        | 3     | 3  | 3    | 3  |            |            |            |            |            |            |           |           |           |         |      |      |      |      |      |      |      |     |      |      |     |     |     |      |      |  |  |  |
| P00010153  | RPL23 | 60S ribosomal protein L23                    | 100.0% | 34.3  | 4  | 4    | 4  | 6          | 2          | 9,919,883  | 9,985,967  | 9,909,024  | 11,548,918 | 673,658   | 348,527   | 725,601   | 560,131 | 15.2 | 7.8  | 16.4 | 10.9 | 1.0  | 0.9  | -1.0 | 1.1 | 0.2  | 0.9  | 1.2 | 0.5 | 1.2 | 0.1  |      |  |  |  |
| P000795408 | RPL23 | 15.0S ribosomal protein L23                  | 100.0% | 34.3  | 4  | 4    | 4  | 6          | 2          | 9,919,883  | 9,985,967  | 9,909,024  | 11,548,918 | 673,658   | 348,527   | 725,601   | 560,131 | 15.2 | 7.8  | 16.4 | 10.9 | 1.0  | 0.9  | -1.0 | 1.1 | 0.2  | 0.9  | 1.2 | 0.5 | 1.2 | 0.1  |      |  |  |  |
|            |       | GSATRNPK                                     |        | 2     | 2  | 2    | 2  |            |            |            |            |            |            |           |           |           |         |      |      |      |      |      |      |      |     |      |      |     |     |     |      |      |  |  |  |
|            |       | ISLGLPVAVNCADNTGAK                           |        | 2     | 2  | 2    | 2  |            |            |            |            |            |            |           |           |           |         |      |      |      |      |      |      |      |     |      |      |     |     |     |      |      |  |  |  |
|            |       | LNRLPAMVGSQMMAMTVK                           |        | 2     | 2  | 2    | 2  |            |            |            |            |            |            |           |           |           |         |      |      |      |      |      |      |      |     |      |      |     |     |     |      |      |  |  |  |
| P00010154  | GDI1  | Rab GDP dissociation inhibitor alpha         | 100.0% | 30.2  | 11 | 14   | 19 | 1          | 32,326,308 | 34,758,928 | 32,925,237 | 37,642,004 | 3,044,359  | 1,311,541 | 2,693,220 | 1,069,782 | 21.1    | 8.4  | 18.3 | 8.4  | 1.1  | 0.5  | 1.0  | 0.9  | 1.2 | 0.2  | -1.1 | 0.6 | 1.1 | 0.1 | 1.1  | 0.1  |  |  |  |
|            |       | FLDGGDVFDTGHMALYR                            |        | 2     | 2  | 2    | 2  |            |            |            |            |            |            |           |           |           |         |      |      |      |      |      |      |      |     |      |      |     |     |     |      |      |  |  |  |
|            |       | FELGGDVFDTGHMALYR                            |        | 3     | 3  | 3    | 3  |            |            |            |            |            |            |           |           |           |         |      |      |      |      |      |      |      |     |      |      |     |     |     |      |      |  |  |  |
|            |       | FLMANGSLVK                                   |        | 2     | 2  | 2    | 2  |            |            |            |            |            |            |           |           |           |         |      |      |      |      |      |      |      |     |      |      |     |     |     |      |      |  |  |  |
|            |       | FLVYVFNDENRK                                 |        | 2     | 2  | 2    | 2  |            |            |            |            |            |            |           |           |           |         |      |      |      |      |      |      |      |     |      |      |     |     |     |      |      |  |  |  |
|            |       | FLLLEGPESAKR                                 |        | 2     | 2  | 2    | 2  |            |            |            |            |            |            |           |           |           |         |      |      |      |      |      |      |      |     |      |      |     |     |     |      |      |  |  |  |
|            |       | KFLDGGDVFDTGHMALYR                           |        | 3     | 3  | 3    | 3  |            |            |            |            |            |            |           |           |           |         |      |      |      |      |      |      |      |     |      |      |     |     |     |      |      |  |  |  |
|            |       | KQNDVFGAEG                                   |        | 2     | 2  | 2    | 2  |            |            |            |            |            |            |           |           |           |         |      |      |      |      |      |      |      |     |      |      |     |     |     |      |      |  |  |  |
|            |       | LYVESLAR                                     |        | 2     | 2  | 2    | 2  |            |            |            |            |            |            |           |           |           |         |      |      |      |      |      |      |      |     |      |      |     |     |     |      |      |  |  |  |
|            |       | MLLYTEVTR                                    |        | 2     | 2  | 2    | 2  |            |            |            |            |            |            |           |           |           |         |      |      |      |      |      |      |      |     |      |      |     |     |     |      |      |  |  |  |
|            |       | QLDQPSYPRK                                   |        | 2     | 2  | 2    | 2  |            |            |            |            |            |            |           |           |           |         |      |      |      |      |      |      |      |     |      |      |     |     |     |      |      |  |  |  |
|            |       | SPYLYLYVGLGELPGQFAR                          |        | 2     | 2  | 2    | 2  |            |            |            |            |            |            |           |           |           |         |      |      |      |      |      |      |      |     |      |      |     |     |     |      |      |  |  |  |
|            |       | SPYLYLYVGLGELPGQFAR                          |        | 3     | 3  | 3    | 3  |            |            |            |            |            |            |           |           |           |         |      |      |      |      |      |      |      |     |      |      |     |     |     |      |      |  |  |  |
|            |       | VPSTETALSNLMGMEFK                            |        | 2     | 2  | 2    | 2  |            |            |            |            |            |            |           |           |           |         |      |      |      |      |      |      |      |     |      |      |     |     |     |      |      |  |  |  |
|            |       | VPTETALSNLMGMEFK                             |        | 3     | 3  | 3    | 3  |            |            |            |            |            |            |           |           |           |         |      |      |      |      |      |      |      |     |      |      |     |     |     |      |      |  |  |  |
| P00010157  | MAT2A | S-adenosylmethionine synthase isoform type-2 | 100.0% | 13.9  | 4  | 4    | 4  | 1          | 16,798,595 | 19,124,966 | 16,230,010 | 21,637,075 | 2,227,819  | 1,500,931 | 2,238,794 | 1,264,021 | 29.7    | 17.6 | 30.8 | 13.1 | 1.1  | 0.4  | -1.0 | 0.9  | 1.3 | 0.1  | -1.2 | 0.3 | 1.1 | 0.2 | 1.3  | 0.07 |  |  |  |
|            |       | IVYVGGQSDMLGTR                               |        | 2     | 2  | 2    | 2  |            |            |            |            |            |            |           |           |           |         |      |      |      |      |      |      |      |     |      |      |     |     |     |      |      |  |  |  |
|            |       | IVYVGGQSDMLGTR                               |        | 3     | 3  | 3    | 3  |            |            |            |            |            |            |           |           |           |         |      |      |      |      |      |      |      |     |      |      |     |     |     |      |      |  |  |  |
|            |       | IVYVGGQSDMLGTR                               |        | 4     | 4  | 4    | 4  |            |            |            |            |            |            |           |           |           |         |      |      |      |      |      |      |      |     |      |      |     |     |     |      |      |  |  |  |
|            |       | IVYVGGQSDMLGTR                               |        | 5     | 5  | 5    | 5  |            |            |            |            |            |            |           |           |           |         |      |      |      |      |      |      |      |     |      |      |     |     |     |      |      |  |  |  |
|            |       | IVYVGGQSDMLGTR                               |        | 6     | 6  | 6    | 6  |            |            |            |            |            |            |           |           |           |         |      |      |      |      |      |      |      |     |      |      |     |     |     |      |      |  |  |  |
|            |       | IVYVGGQSDMLGTR                               |        | 7     | 7  | 7    | 7  |            |            |            |            |            |            |           |           |           |         |      |      |      |      |      |      |      |     |      |      |     |     |     |      |      |  |  |  |
|            |       | IVYVGGQSDMLGTR                               |        | 8     | 8  | 8    | 8  |            |            |            |            |            |            |           |           |           |         |      |      |      |      |      |      |      |     |      |      |     |     |     |      |      |  |  |  |
|            |       | IVYVGGQSDMLGTR                               |        | 9     | 9  | 9    | 9  |            |            |            |            |            |            |           |           |           |         |      |      |      |      |      |      |      |     |      |      |     |     |     |      |      |  |  |  |
|            |       | IVYVGGQSDMLGTR                               |        | 10    | 10 | 10   | 10 |            |            |            |            |            |            |           |           |           |         |      |      |      |      |      |      |      |     |      |      |     |     |     |      |      |  |  |  |
|            |       | IVYVGGQSDMLGTR                               |        | 11    | 11 | 11   | 11 |            |            |            |            |            |            |           |           |           |         |      |      |      |      |      |      |      |     |      |      |     |     |     |      |      |  |  |  |
|            |       | IVYVGGQSDMLGTR                               |        | 12    | 12 | 12   | 12 |            |            |            |            |            |            |           |           |           |         |      |      |      |      |      |      |      |     |      |      |     |     |     |      |      |  |  |  |
|            |       | IVYVGGQSDMLGTR                               |        | 13    | 13 | 13   | 13 |            |            |            |            |            |            |           |           |           |         |      |      |      |      |      |      |      |     |      |      |     |     |     |      |      |  |  |  |
|            |       | IVYVGGQSDMLGTR                               |        | 14    | 14 | 14   | 14 |            |            |            |            |            |            |           |           |           |         |      |      |      |      |      |      |      |     |      |      |     |     |     |      |      |  |  |  |
|            |       | IVYVGGQSDMLGTR                               |        | 15    | 15 | 15   | 15 |            |            |            |            |            |            |           |           |           |         |      |      |      |      |      |      |      |     |      |      |     |     |     |      |      |  |  |  |
|            |       | IVYVGGQSDMLGTR                               |        | 16    | 16 | 16   | 16 |            |            |            |            |            |            |           |           |           |         |      |      |      |      |      |      |      |     |      |      |     |     |     |      |      |  |  |  |
|            |       | IVYVGGQSDMLGTR                               |        | 17    | 17 | 17   | 17 |            |            |            |            |            |            |           |           |           |         |      |      |      |      |      |      |      |     |      |      |     |     |     |      |      |  |  |  |
|            |       | IVYVGGQSDMLGTR                               |        | 18    | 18 | 18   | 18 |            |            |            |            |            |            |           |           |           |         |      |      |      |      |      |      |      |     |      |      |     |     |     |      |      |  |  |  |
|            |       | IVYVGGQSDMLGTR                               |        | 19    | 19 | 19   | 19 |            |            |            |            |            |            |           |           |           |         |      |      |      |      |      |      |      |     |      |      |     |     |     |      |      |  |  |  |
|            |       | IVYVGGQSDMLGTR                               |        | 20    | 20 | 20   | 20 |            |            |            |            |            |            |           |           |           |         |      |      |      |      |      |      |      |     |      |      |     |     |     |      |      |  |  |  |
|            |       | IVYVGGQSDMLGTR                               |        | 21    | 21 | 21   | 21 |            |            |            |            |            |            |           |           |           |         |      |      |      |      |      |      |      |     |      |      |     |     |     |      |      |  |  |  |
|            |       | IVYVGGQSDMLGTR                               |        | 22    | 22 | 22   | 22 |            |            |            |            |            |            |           |           |           |         |      |      |      |      |      |      |      |     |      |      |     |     |     |      |      |  |  |  |
|            |       | IVYVGGQSDMLGTR                               |        | 23    | 23 | 23   | 23 |            |            |            |            |            |            |           |           |           |         |      |      |      |      |      |      |      |     |      |      |     |     |     |      |      |  |  |  |
|            |       | IVYVGGQSDMLGTR                               |        | 24    | 24 | 24   | 24 |            |            |            |            |            |            |           |           |           |         |      |      |      |      |      |      |      |     |      |      |     |     |     |      |      |  |  |  |
|            |       | IVYVGGQSDMLGTR                               |        | 25    | 25 | 25</ |    |            |            |            |            |            |            |           |           |           |         |      |      |      |      |      |      |      |     |      |      |     |     |     |      |      |  |  |  |





|           |        |                                                                                 |        |        |        |        |    |    |            |            |            |            |            |           |           |           |         |      |      |      |      |      |      |     |     |      |      |      |     |      |      |      |      |  |  |
|-----------|--------|---------------------------------------------------------------------------------|--------|--------|--------|--------|----|----|------------|------------|------------|------------|------------|-----------|-----------|-----------|---------|------|------|------|------|------|------|-----|-----|------|------|------|-----|------|------|------|------|--|--|
| P0001134  | HSPA7  | Putative heat shock 70 kDa protein 7                                            | 100.0% | 3      | 100.0% | 1      | 1  | 1  | 703.447    | 721.692    | 682.965    | 850.490    | 47.476     | 40.076    | 66.087    | 26.161    | 15.1    | 12.4 | 21.6 | 7.4  | 1.0  | 0.8  | -1.0 | 0.8 | 1.2 | 0.03 | -1.1 | 0.6  | 1.2 | 0.03 | 1.2  | 0.05 |      |  |  |
| P0001177  | EIF3F2 | EIF3F2                                                                          | 100.0% | 3      | 100.0% | 1      | 1  | 1  | 729.728    | 824.112    | 763.558    | 880.752    | 51.375     | 75.853    | 59.899    | 47.087    | 15.7    | 20.6 | 17.5 | 12.0 | 1.1  | 0.3  | 1.0  | 0.7 | 1.2 | 0.06 | -1.1 | 0.5  | 1.1 | 0.5  | 1.2  | 0.2  |      |  |  |
| P0001206  | PHGDH  | D-3-phosphoglycerate dehydrogenase                                              | 100.0% | 11     | 100.0% | 2      | 2  | 1  | 38,663.481 | 41,653.022 | 39,772.436 | 45,318.414 | 2,523.492  | 1,599.963 | 2,220.753 | 2,752.326 | 14.8    | 8.6  | 12.5 | 13.6 | 1.1  | 0.3  | 1.0  | 0.7 | 1.2 | 0.1  | -1.0 | 0.5  | 1.1 | 0.3  | 1.1  | 0.2  |      |  |  |
|           |        | AGVGVYVDLAEATR                                                                  | 2      | 100.0% | 2      | 100.0% | 1  | 1  |            |            |            |            |            |           |           |           |         |      |      |      |      |      |      |     |     |      |      |      |     |      |      |      |      |  |  |
|           |        | ALVERHVSCHPLGASTK                                                               | 3      | 100.0% | 1      | 100.0% | 1  | 1  |            |            |            |            |            |           |           |           |         |      |      |      |      |      |      |     |     |      |      |      |     |      |      |      |      |  |  |
|           |        | CGEAAVQVYVMYK                                                                   | 2      | 100.0% | 1      | 100.0% | 1  | 1  |            |            |            |            |            |           |           |           |         |      |      |      |      |      |      |     |     |      |      |      |     |      |      |      |      |  |  |
|           |        | DLPLLR                                                                          | 2      | 99.9%  | 1      | 100.0% | 1  | 1  |            |            |            |            |            |           |           |           |         |      |      |      |      |      |      |     |     |      |      |      |     |      |      |      |      |  |  |
|           |        | GSVDEGALLR                                                                      | 2      | 99.9%  | 1      | 100.0% | 1  | 1  |            |            |            |            |            |           |           |           |         |      |      |      |      |      |      |     |     |      |      |      |     |      |      |      |      |  |  |
|           |        | LGQGGLOVYK                                                                      | 2      | 100.0% | 2      | 100.0% | 2  | 2  |            |            |            |            |            |           |           |           |         |      |      |      |      |      |      |     |     |      |      |      |     |      |      |      |      |  |  |
|           |        | KLDGGLOVYK                                                                      | 2      | 99.6%  | 1      | 100.0% | 1  | 1  |            |            |            |            |            |           |           |           |         |      |      |      |      |      |      |     |     |      |      |      |     |      |      |      |      |  |  |
|           |        | NAGNLSFPAVYGLK                                                                  | 2      | 100.0% | 2      | 100.0% | 2  | 2  |            |            |            |            |            |           |           |           |         |      |      |      |      |      |      |     |     |      |      |      |     |      |      |      |      |  |  |
|           |        | TQTSQPAALPTMIGLAEAGVR                                                           | 2      | 100.0% | 2      | 100.0% | 2  | 2  |            |            |            |            |            |           |           |           |         |      |      |      |      |      |      |     |     |      |      |      |     |      |      |      |      |  |  |
|           |        | TQTSQPALPTMIGLAEAGVR                                                            | 3      | 100.0% | 1      | 100.0% | 1  | 1  |            |            |            |            |            |           |           |           |         |      |      |      |      |      |      |     |     |      |      |      |     |      |      |      |      |  |  |
|           |        | VLSDSLPCR                                                                       | 2      | 97.2%  | 1      | 100.0% | 1  | 1  |            |            |            |            |            |           |           |           |         |      |      |      |      |      |      |     |     |      |      |      |     |      |      |      |      |  |  |
|           |        | VYDVAHAAEK                                                                      | 2      | 91.2%  | 1      | 100.0% | 1  | 1  |            |            |            |            |            |           |           |           |         |      |      |      |      |      |      |     |     |      |      |      |     |      |      |      |      |  |  |
| P0001201  | ME2    | NAD-dependent malic enzyme, mitochondrial                                       | 99.4%  | 1      | 100.0% | 1      | 1  | 2  | 2,148.380  | 2,497.656  | 2,180.355  | 2,823.080  | 251.149    | 171.211   | 169.367   | 217.603   | 26.1    | 15.3 | 17.4 | 17.2 | 1.2  | 0.3  | 1.0  | 0.9 | 1.3 | 0.08 | -1.1 | 0.2  | 1.1 | 0.3  | 1.3  | 0.05 |      |  |  |
| P0004367  | ME2    | NAD-dependent malic enzyme, mitochondrial isoform 2 precursor                   | 99.4%  | 3      | 100.0% | 1      | 1  | 2  | 2,148.380  | 2,497.656  | 2,180.355  | 2,823.080  | 251.149    | 171.211   | 169.367   | 217.603   | 26.1    | 15.3 | 17.4 | 17.2 | 1.2  | 0.3  | 1.0  | 0.9 | 1.3 | 0.08 | -1.1 | 0.2  | 1.1 | 0.3  | 1.3  | 0.05 |      |  |  |
|           |        | ILGLSDYDYGKPGVYK                                                                | 2      | 99.4%  | 1      | 100.0% | 1  | 1  |            |            |            |            |            |           |           |           |         |      |      |      |      |      |      |     |     |      |      |      |     |      |      |      |      |  |  |
| P0001223  | CTSD   | Cathepsin D                                                                     | 100.0% | 32     | 100.0% | 9      | 11 | 16 | 51,872.505 | 58,471.209 | 51,665.085 | 63,843.432 | 4,495.419  | 4,020.474 | 3,240.390 | 4,162.896 | 18.0    | 15.4 | 14.0 | 14.6 | 1.0  | 0.7  | -1.3 | 0.5 | 1.1 | 0.2  | -1.1 | 0.2  | 1.1 | 0.4  | 1.2  | 0.05 |      |  |  |
|           |        | ARGAVPLOGEYVIMPEK                                                               | 2      | 100.0% | 2      | 100.0% | 2  | 2  |            |            |            |            |            |           |           |           |         |      |      |      |      |      |      |     |     |      |      |      |     |      |      |      |      |  |  |
|           |        | AGAVAVLDQSEYIMPEK                                                               | 3      | 100.0% | 1      | 100.0% | 1  | 1  |            |            |            |            |            |           |           |           |         |      |      |      |      |      |      |     |     |      |      |      |     |      |      |      |      |  |  |
|           |        | AYWQVHLDVAVASGLYK                                                               | 3      | 98.7%  | 1      | 100.0% | 1  | 1  |            |            |            |            |            |           |           |           |         |      |      |      |      |      |      |     |     |      |      |      |     |      |      |      |      |  |  |
|           |        | EPDMPQGGELMLGGTDSK                                                              | 2      | 100.0% | 2      | 100.0% | 2  | 2  |            |            |            |            |            |           |           |           |         |      |      |      |      |      |      |     |     |      |      |      |     |      |      |      |      |  |  |
|           |        | EGCEAVDTGTEMLVQVDEVR                                                            | 2      | 100.0% | 1      | 100.0% | 1  | 1  |            |            |            |            |            |           |           |           |         |      |      |      |      |      |      |     |     |      |      |      |     |      |      |      |      |  |  |
|           |        | FDGILGMAYPR                                                                     | 2      | 100.0% | 2      | 100.0% | 2  | 2  |            |            |            |            |            |           |           |           |         |      |      |      |      |      |      |     |     |      |      |      |     |      |      |      |      |  |  |
|           |        | ISWNNLPVFDNLMQOK                                                                | 2      | 100.0% | 2      | 100.0% | 2  | 2  |            |            |            |            |            |           |           |           |         |      |      |      |      |      |      |     |     |      |      |      |     |      |      |      |      |  |  |
|           |        | ISWNNLPVFDNLMQOK                                                                | 3      | 100.0% | 2      | 100.0% | 2  | 2  |            |            |            |            |            |           |           |           |         |      |      |      |      |      |      |     |     |      |      |      |     |      |      |      |      |  |  |
|           |        | LLDIAQWIKK                                                                      | 3      | 99.4%  | 1      | 100.0% | 1  | 1  |            |            |            |            |            |           |           |           |         |      |      |      |      |      |      |     |     |      |      |      |     |      |      |      |      |  |  |
|           |        | QVYGEATK                                                                        | 2      | 95.4%  | 1      | 100.0% | 1  | 1  |            |            |            |            |            |           |           |           |         |      |      |      |      |      |      |     |     |      |      |      |     |      |      |      |      |  |  |
|           |        | VQGFLEAK                                                                        | 2      | 98.5%  | 1      | 100.0% | 1  | 1  |            |            |            |            |            |           |           |           |         |      |      |      |      |      |      |     |     |      |      |      |     |      |      |      |      |  |  |
| P0001250  | UCHL3  | Ubiquitin carboxyl-terminal hydrolase isozyme L3                                | 100.0% | 30     | 100.0% | 5      | 6  | 8  | 1          | 21,928.485 | 20,797.588 | 22,027.332 | 25,842.475 | 2,152.408 | 846.544   | 1,652.055 | 958.601 | 22.0 | 9.1  | 16.8 | 8.3  | -1.1 | 0.6  | 1.0 | 1   | 1.2  | 0.1  | 1.1  | 0.5 | 1.2  | 0.04 | 1.2  | 0.08 |  |  |
|           |        | FLEESVSMFEER                                                                    | 2      | 100.0% | 2      | 100.0% | 2  | 2  |            |            |            |            |            |           |           |           |         |      |      |      |      |      |      |     |     |      |      |      |     |      |      |      |      |  |  |
|           |        | MHESSTSLIK                                                                      | 3      | 98.6%  | 1      | 100.0% | 1  | 1  |            |            |            |            |            |           |           |           |         |      |      |      |      |      |      |     |     |      |      |      |     |      |      |      |      |  |  |
|           |        | VHETSNEGQTEAPSIDEK                                                              | 3      | 84.9%  | 1      | 100.0% | 1  | 1  |            |            |            |            |            |           |           |           |         |      |      |      |      |      |      |     |     |      |      |      |     |      |      |      |      |  |  |
|           |        | WLPLEANVEVNFNFK                                                                 | 2      | 100.0% | 2      | 100.0% | 2  | 2  |            |            |            |            |            |           |           |           |         |      |      |      |      |      |      |     |     |      |      |      |     |      |      |      |      |  |  |
|           |        | WLGLEANSTYNGFLK                                                                 | 3      | 98.6%  | 1      | 100.0% | 1  | 1  |            |            |            |            |            |           |           |           |         |      |      |      |      |      |      |     |     |      |      |      |     |      |      |      |      |  |  |
|           |        | YLENVDAK                                                                        | 2      | 100.0% | 1      | 100.0% | 1  | 1  |            |            |            |            |            |           |           |           |         |      |      |      |      |      |      |     |     |      |      |      |     |      |      |      |      |  |  |
| P0001253  | RPS3   | 40S ribosomal protein S3                                                        | 100.0% | 42     | 100.0% | 8      | 9  | 11 | 1          | 10,898.805 | 11,985.820 | 10,995.798 | 12,352.110 | 1,257.408 | 682.592   | 1,052.468 | 592.456 | 25.8 | 12.7 | 21.4 | 10.7 | 1.1  | 0.5  | 1.0 | 1   | 1.1  | 0.3  | -1.1 | 0.5 | 1.0  | 0.7  | 1.1  | 0.3  |  |  |
|           |        | ALNDELTR                                                                        | 2      | 97.6%  | 1      | 100.0% | 1  | 1  |            |            |            |            |            |           |           |           |         |      |      |      |      |      |      |     |     |      |      |      |     |      |      |      |      |  |  |
|           |        | ELAEDYGSVEVR                                                                    | 2      | 100.0% | 2      | 100.0% | 2  | 2  |            |            |            |            |            |           |           |           |         |      |      |      |      |      |      |     |     |      |      |      |     |      |      |      |      |  |  |
|           |        | FGPFGSSVLYAK                                                                    | 2      | 100.0% | 2      | 100.0% | 2  | 2  |            |            |            |            |            |           |           |           |         |      |      |      |      |      |      |     |     |      |      |      |     |      |      |      |      |  |  |
|           |        | FVGLMPLGSSVYVDTAVR                                                              | 3      | 100.0% | 1      | 100.0% | 1  | 1  |            |            |            |            |            |           |           |           |         |      |      |      |      |      |      |     |     |      |      |      |     |      |      |      |      |  |  |
|           |        | GCEVVYSGK                                                                       | 2      | 99.8%  | 1      | 100.0% | 1  | 1  |            |            |            |            |            |           |           |           |         |      |      |      |      |      |      |     |     |      |      |      |     |      |      |      |      |  |  |
|           |        | GGPPEPPAMPQPPPTA                                                                | 2      | 100.0% | 2      | 100.0% | 2  | 2  |            |            |            |            |            |           |           |           |         |      |      |      |      |      |      |     |     |      |      |      |     |      |      |      |      |  |  |
|           |        | GLCAQAESEK                                                                      | 2      | 100.0% | 1      | 100.0% | 1  | 1  |            |            |            |            |            |           |           |           |         |      |      |      |      |      |      |     |     |      |      |      |     |      |      |      |      |  |  |
|           |        | KFVADGFK                                                                        | 2      | 96.7%  | 1      | 100.0% | 1  | 1  |            |            |            |            |            |           |           |           |         |      |      |      |      |      |      |     |     |      |      |      |     |      |      |      |      |  |  |
| P0001288  | RALY   | dRNA FL17422, highly similar to Homo sapiens RNA binding protein, autoantigenic | 100.0% | 18     | 100.0% | 3      | 4  | 2  | 2,470.140  | 2,472.514  | 2,355.848  | 3,069.082  | 215.706    | 136.980   | 221.504   | 106.054   | 19.9    | 12.4 | 21.0 | 7.7  | 1.0  | 1    | -1.0 | 0.7 | 1.2 | 0.04 | -1.0 | 0.7  | 1.2 | 0.09 | 1.3  | 0.02 |      |  |  |
| P00021604 | RALY   | isoform 1 of RNA-binding protein Raly                                           | 100.0% | 18     | 100.0% | 3      | 4  | 2  | 2,470.140  | 2,472.514  | 2,355.848  | 3,069.082  | 215.706    | 136.980   | 221.504   | 106.054   | 19.9    | 12.4 | 21.0 | 7.7  | 1.0  | 1    | -1.0 | 0.7 | 1.2 | 0.04 | -1.0 | 0.7  | 1.2 | 0.09 | 1.3  | 0.02 |      |  |  |
|           |        | GYAFVQVSNR                                                                      | 2      | 99.9%  | 1      | 100.0% | 1  | 1  |            |            |            |            |            |           |           |           |         |      |      |      |      |      |      |     |     |      |      |      |     |      |      |      |      |  |  |
|           |        | KSQVETFSK                                                                       | 2      | 99.9%  | 1      | 100.0% | 1  | 1  |            |            |            |            |            |           |           |           |         |      |      |      |      |      |      |     |     |      |      |      |     |      |      |      |      |  |  |
|           |        | LEQVAQEK                                                                        | 2      | 98.9%  | 1      | 100.0% | 1  | 1  |            |            |            |            |            |           |           |           |         |      |      |      |      |      |      |     |     |      |      |      |     |      |      |      |      |  |  |
| P0001274  | HRRPDL | isoform 1 of Heterogeneous nuclear ribonucleoprotein D-like                     | 100.0% | 10     | 100.0% | 5      | 5  | 6  | 3          | 5,143.181  | 5,354.968  | 5,054.502  | 6,107.587  | 548.880   |           |           |         |      |      |      |      |      |      |     |     |      |      |      |     |      |      |      |      |  |  |













|             |           |                                                                      |        |      |       |   |   |    |            |            |            |            |           |         |           |         |      |      |      |      |      |     |      |      |      |      |      |      |      |      |      |      |
|-------------|-----------|----------------------------------------------------------------------|--------|------|-------|---|---|----|------------|------------|------------|------------|-----------|---------|-----------|---------|------|------|------|------|------|-----|------|------|------|------|------|------|------|------|------|------|
| P00385161   | MUC1C     | Mucin short variant SV10                                             | 99.3%  | 7.4  | 1     | 1 | 1 | 14 | 562.152    | 524.783    | 542.540    | 568.159    | 53.564    | 24.761  | 38.678    | 42.667  | 21.3 | 10.6 | 15.9 | 16.8 | -1.1 | 0.5 | -1.0 | 0.8  | 1.0  | 0.9  | 1.0  | 0.7  | 1.1  | 0.4  | 1.0  | 0.7  |
| P00507569   | MUC1C     | mucin-1 isoform 2 precursor                                          | 99.3%  | 4.2  | 1     | 1 | 1 | 14 | 562.152    | 524.783    | 542.540    | 568.159    | 53.564    | 24.761  | 38.678    | 42.667  | 21.3 | 10.6 | 15.9 | 16.8 | -1.1 | 0.5 | -1.0 | 0.8  | 1.0  | 0.9  | 1.0  | 0.7  | 1.1  | 0.4  | 1.0  | 0.7  |
| P00507673   | MUC1C     | isoform 1 of Mucin 1                                                 | 99.3%  | 4.0  | 1     | 1 | 1 | 14 | 562.152    | 524.783    | 542.540    | 568.159    | 53.564    | 24.761  | 38.678    | 42.667  | 21.3 | 10.6 | 15.9 | 16.8 | -1.1 | 0.5 | -1.0 | 0.8  | 1.0  | 0.9  | 1.0  | 0.7  | 1.1  | 0.4  | 1.0  | 0.7  |
| P00385252   | MUC1C     | mucin-1 isoform 1 precursor                                          | 99.3%  | 2.3  | 1     | 1 | 1 | 14 | 562.152    | 524.783    | 542.540    | 568.159    | 53.564    | 24.761  | 38.678    | 42.667  | 21.3 | 10.6 | 15.9 | 16.8 | -1.1 | 0.5 | -1.0 | 0.8  | 1.0  | 0.9  | 1.0  | 0.7  | 1.1  | 0.4  | 1.0  | 0.7  |
| P00507629   | MUC1C     | mucin-1 isoform 11 precursor                                         | 99.3%  | 3.9  | 1     | 1 | 1 | 14 | 562.152    | 524.783    | 542.540    | 568.159    | 53.564    | 24.761  | 38.678    | 42.667  | 21.3 | 10.6 | 15.9 | 16.8 | -1.1 | 0.5 | -1.0 | 0.8  | 1.0  | 0.9  | 1.0  | 0.7  | 1.1  | 0.4  | 1.0  | 0.7  |
| P005075473  | MUC1C     | mucin-1 isoform 10 precursor                                         | 99.3%  | 2.0  | 1     | 1 | 1 | 14 | 562.152    | 524.783    | 542.540    | 568.159    | 53.564    | 24.761  | 38.678    | 42.667  | 21.3 | 10.6 | 15.9 | 16.8 | -1.1 | 0.5 | -1.0 | 0.8  | 1.0  | 0.9  | 1.0  | 0.7  | 1.1  | 0.4  | 1.0  | 0.7  |
| P005076291  | MUC1C     | mucin-1 isoform 12 precursor                                         | 99.3%  | 2.0  | 1     | 1 | 1 | 14 | 562.152    | 524.783    | 542.540    | 568.159    | 53.564    | 24.761  | 38.678    | 42.667  | 21.3 | 10.6 | 15.9 | 16.8 | -1.1 | 0.5 | -1.0 | 0.8  | 1.0  | 0.9  | 1.0  | 0.7  | 1.1  | 0.4  | 1.0  | 0.7  |
| P005076202  | MUC1C     | mucin-1 isoform 11 precursor                                         | 99.3%  | 5.6  | 1     | 1 | 1 | 14 | 562.152    | 524.783    | 542.540    | 568.159    | 53.564    | 24.761  | 38.678    | 42.667  | 21.3 | 10.6 | 15.9 | 16.8 | -1.1 | 0.5 | -1.0 | 0.8  | 1.0  | 0.9  | 1.0  | 0.7  | 1.1  | 0.4  | 1.0  | 0.7  |
| P005073974  | LAMB1     | Laminin subunit beta-1                                               | 99.6%  | 1.1  | 1     | 1 | 1 | 2  | 170.361    | 197.059    | 278.966    | 233.371    | 19.279    | 28.629  | 41.858    | 8.611   | 25.3 | 32.5 | 33.6 | 9.2  | 1.2  | 0.5 | 1.6  | 0.05 | 1.4  | 0.02 | 1.4  | 0.1  | 1.2  | 0.3  | -1.2 | 0.3  |
| P005083454  | LAMB1     | 200 kDa protein                                                      | 99.6%  | 1.1  | 1     | 1 | 1 | 2  | 170.361    | 197.059    | 278.966    | 233.371    | 19.279    | 28.629  | 41.858    | 8.611   | 25.3 | 32.5 | 33.6 | 9.2  | 1.2  | 0.5 | 1.6  | 0.05 | 1.4  | 0.02 | 1.4  | 0.1  | 1.2  | 0.3  | -1.2 | 0.3  |
| P005093008  | -         | cDNA FLJ57891, highly similar to Tropomyosin beta chain              | 99.3%  | 7.0  | 1     | 1 | 1 | 3  | 366.525    | 311.653    | 313.742    | 366.575    | 59.163    | 24.099  | 31.126    | 23.145  | 36.1 | 17.3 | 22.2 | 14.1 | -1.2 | 0.4 | -1.2 | 0.5  | 1.0  | 1    | 1.0  | 1    | 1.2  | 0.1  | 1.2  | 0.2  |
| P005013991  | TPM2      | isoform 1 of Tropomyosin beta chain                                  | 99.3%  | 3.9  | 1     | 1 | 1 | 3  | 366.525    | 311.653    | 313.742    | 366.575    | 59.163    | 24.099  | 31.126    | 23.145  | 36.1 | 17.3 | 22.2 | 14.1 | -1.2 | 0.4 | -1.2 | 0.5  | 1.0  | 1    | 1.0  | 1    | 1.2  | 0.1  | 1.2  | 0.2  |
| P005013989  | TPM2      | Tropomyosin 2                                                        | 99.3%  | 7.4  | 1     | 1 | 1 | 3  | 366.525    | 311.653    | 313.742    | 366.575    | 59.163    | 24.099  | 31.126    | 23.145  | 36.1 | 17.3 | 22.2 | 14.1 | -1.2 | 0.4 | -1.2 | 0.5  | 1.0  | 1    | 1.0  | 1    | 1.2  | 0.1  | 1.2  | 0.2  |
| P005047576  | LOC728057 | Similar to Mitochondrial import receptor subunit TOM40 homolog       | 99.1%  | 1.97 | 1     | 1 | 1 | 2  | 1,645.430  | 1,757.140  | 1,556.280  | 1,817.025  | 171.923   | 203.110 | 117.693   | 128.827 | 23.4 | 29.9 | 16.8 | 15.9 | 1.1  | 0.7 | -1.1 | 0.7  | 1.1  | 0.4  | -1.1 | 0.4  | 1.0  | 0.8  | 1.2  | 0.2  |
| P005014605  | TOM40     | isoform 1 of Mitochondrial import receptor subunit TOM40 homolog     | 99.1%  | 4.2  | 1     | 1 | 1 | 2  | 1,645.430  | 1,757.140  | 1,556.280  | 1,817.025  | 171.923   | 203.110 | 117.693   | 128.827 | 23.4 | 29.9 | 16.8 | 15.9 | 1.1  | 0.7 | -1.1 | 0.7  | 1.1  | 0.4  | -1.1 | 0.4  | 1.0  | 0.8  | 1.2  | 0.2  |
| P0050014988 | PAK4      | isoform 1 of Serine/threonine-protein kinase PAK 4                   | 99.5%  | 3.1  | 1     | 1 | 1 | 3  | 101.684    | 84.411     | 116.176    | 107.123    | 16.528    | 10.267  | 16.698    | 8.072   | 36.4 | 24.3 | 32.1 | 16.9 | -1.1 | 0.7 | 1.1  | 0.6  | 1.1  | 0.8  | 1.2  | 0.3  | 1.1  | 0.4  | -1.1 | 0.6  |
| P005017874  | PAK4      | isoform 2 of Serine/threonine-protein kinase PAK 4                   | 99.5%  | 3.1  | 1     | 1 | 1 | 3  | 101.684    | 84.411     | 116.176    | 107.123    | 16.528    | 10.267  | 16.698    | 8.072   | 36.4 | 24.3 | 32.1 | 16.9 | -1.1 | 0.7 | 1.1  | 0.6  | 1.1  | 0.8  | 1.2  | 0.3  | 1.1  | 0.4  | -1.1 | 0.6  |
| P005034231  | PAK4      | isoform 3 of Serine/threonine-protein kinase PAK 4                   | 99.5%  | 3.6  | 1     | 1 | 1 | 3  | 101.684    | 84.411     | 116.176    | 107.123    | 16.528    | 10.267  | 16.698    | 8.072   | 36.4 | 24.3 | 32.1 | 16.9 | -1.1 | 0.7 | 1.1  | 0.6  | 1.1  | 0.8  | 1.2  | 0.3  | 1.1  | 0.4  | -1.1 | 0.6  |
| P005021453  | PSM6      | 26S proteasome non-ATPase regulatory subunit 6                       | 100.0% | 2    | 99.9% | 1 | 1 | 3  | 2,542.930  | 2,834.053  | 2,568.927  | 2,546.649  | 232.006   | 91.316  | 234.434   | 61.964  | 20.4 | 7.2  | 20.4 | 4.7  | 1.1  | 0.3 | 1.0  | 0.9  | 1.2  | 0.2  | -1.1 | 0.3  | 1.0  | 0.3  | 1.1  | 0.2  |
| P005075338  | PSM6      | Uncharacterized protein                                              | 100.0% | 7.9  | 3     | 3 | 3 | 3  | 2,542.930  | 2,834.053  | 2,568.927  | 2,546.649  | 232.006   | 91.316  | 234.434   | 61.964  | 20.4 | 7.2  | 20.4 | 4.7  | 1.1  | 0.3 | 1.0  | 0.9  | 1.2  | 0.2  | -1.1 | 0.3  | 1.0  | 0.3  | 1.1  | 0.2  |
| P005014177  | SEP2      | isoform 1 of Septin-2                                                | 100.0% | 27.7 | 7     | 7 | 8 | 3  | 5,512.602  | 5,585.513  | 5,278.139  | 6,140.298  | 648.364   | 370.919 | 435.328   | 173.068 | 26.3 | 14.9 | 18.4 | 6.3  | 1.0  | 0.9 | -1.0 | 0.8  | 1.1  | 0.4  | -1.1 | 0.6  | 1.1  | 0.2  | 1.2  | 0.1  |
| P005017803  | SEP2      | isoform 2 of Septin-2                                                | 100.0% | 25.3 | 7     | 7 | 7 | 3  | 5,512.602  | 5,585.513  | 5,278.139  | 6,140.298  | 648.364   | 370.919 | 435.328   | 173.068 | 26.3 | 14.9 | 18.4 | 6.3  | 1.0  | 0.9 | -1.0 | 0.8  | 1.1  | 0.4  | -1.1 | 0.6  | 1.1  | 0.2  | 1.2  | 0.1  |
| P005084340  | SEP2      | Uncharacterized protein                                              | 100.0% | 31.2 | 7     | 7 | 8 | 3  | 5,512.602  | 5,585.513  | 5,278.139  | 6,140.298  | 648.364   | 370.919 | 435.328   | 173.068 | 26.3 | 14.9 | 18.4 | 6.3  | 1.0  | 0.9 | -1.0 | 0.8  | 1.1  | 0.4  | -1.1 | 0.6  | 1.1  | 0.2  | 1.2  | 0.1  |
| P005014197  | CDV3      | isoform 1 of Protein CDV3 homolog                                    | 100.0% | 2.7  | 3     | 3 | 3 | 2  | 2,443.319  | 2,732.359  | 2,472.230  | 2,813.361  | 274.474   | 140.706 | 279.070   | 166.051 | 25.1 | 11.5 | 25.2 | 13.2 | 1.1  | 0.4 | 1.0  | 0.9  | 1.2  | 0.3  | -1.1 | 0.4  | 1.0  | 0.7  | 1.1  | 0.3  |
| P005079302  | CDV3      | CDV3 homolog (Mouse), isoform CRA_a                                  | 100.0% | 26.7 | 3     | 3 | 3 | 2  | 2,443.319  | 2,732.359  | 2,472.230  | 2,813.361  | 274.474   | 140.706 | 279.070   | 166.051 | 25.1 | 11.5 | 25.2 | 13.2 | 1.1  | 0.4 | 1.0  | 0.9  | 1.2  | 0.3  | -1.1 | 0.4  | 1.0  | 0.7  | 1.1  | 0.3  |
| P005014198  | EXOSC7    | Exosome complex component RRP42                                      | 91.0%  | 51   | 1     | 1 | 1 | 1  | 4,211.920  | 4,018.180  | 3,920.370  | 4,103.320  | 356.204   | 340.315 | 250.492   | 126.524 | 18.9 | 18.9 | 14.3 | 6.9  | -1.0 | 0.7 | -1.1 | 0.5  | -1.0 | 0.8  | -1.0 | 0.8  | 1.0  | 0.8  | 1.0  | 0.5  |
| P005014233  | CTBP1     | Complement component 1 Q subcomponent binding protein, mitochondrial | 100.0% | 22.0 | 4     | 4 | 5 | 1  | 23,803.613 | 25,259.752 | 21,070.933 | 26,541.482 | 2,876.562 | 633.775 | 2,052.258 | 621.770 | 27.0 | 7.4  | 21.8 | 5.2  | 1.1  | 0.6 | -1.1 | 0.5  | 1.1  | 0.4  | -1.2 | 0.1  | 1.1  | 0.2  | 1.3  | 0.05 |
| P005014238  | SLC39A14  | isoform 1 of Zinc transporter ZIP14                                  | 99.4%  | 4.1  | 1     | 1 | 1 | 3  | 2,441.950  | 2,831.190  | 2,837.353  | 3,291.850  | 359.807   | 114.150 | 296.625   | 166.591 | 33.0 | 9.0  | 23.3 | 11.5 | 1.2  | 0.4 | 1.2  | 0.4  | 1.3  | 0.06 | 1.0  | 1    | 1.2  | 0.05 | 1.2  | 0.2  |
| P0050303452 | SLC39A14  | isoform 2 of Zinc transporter ZIP14                                  | 99.4%  | 4.2  | 1     | 1 | 1 | 3  | 2,441.950  | 2,831.190  | 2,837.353  | 3,291.850  | 359.807   | 114.150 | 296.625   | 166.591 | 33.0 | 9.0  | 23.3 | 11.5 | 1.2  | 0.4 | 1.2  | 0.4  | 1.3  | 0.06 | 1.0  | 1    | 1.2  | 0.05 | 1.2  | 0.2  |
| P00507319   | SLC39A14  | isoform 3 of Zinc transporter ZIP14                                  | 99.4%  | 4.1  | 1     | 1 | 1 | 3  | 2,441.950  | 2,831.190  | 2,837.353  | 3,291.850  | 359.807   | 114.150 | 296.625   | 166.591 | 33.0 | 9.0  | 23.3 | 11.5 | 1.2  | 0.4 | 1.2  | 0.4  | 1.3  | 0.06 | 1.0  | 1    | 1.2  | 0.05 | 1.2  | 0.2  |
| P005014238  | KARS      | isoform Cytosolic of Lysyl-tRNA synthetase                           | 100.0% | 9.4  | 5     | 5 | 6 | 2  | 14,835.388 | 14,578.432 | 14,355.441 | 15,958.675 | 1,162.179 | 566.071 | 833.124   | 429.651 | 17.5 | 8.7  | 13.0 | 6.0  | -1.0 | 0.8 | -1.0 | 0.7  | 1.1  | 0.4  | -1.0 | 0.8  | 1.1  | 0.09 | 1.1  | 0.1  |
| P005030792  | KARS      | isoform Mitochondrial of Lysyl-tRNA synthetase                       | 100.0% | 6.0  | 2     | 2 | 2 | 2  | 14,835.388 | 14,578.432 | 14,355.441 | 15,958.675 | 1,162.179 | 566.071 | 833.124   | 429.651 | 17.5 | 8.7  | 13.0 | 6.0  | -1.0 | 0.8 | -1.0 | 0.7  | 1.1  | 0.4  | -1.0 | 0.8  | 1.1  | 0.09 | 1.1  | 0.1  |
| P005014282  | EIF4H     | isoform Long of Eukaryotic translation initiation factor 4H          | 100.0% | 20.2 | 2     | 2 | 2 | 1  | 6,783.450  | 7,261.016  | 4,662.025  | 7,128.075  | 884.979   | 639.421 | 685.629   | 709.271 | 29.2 | 18.7 | 32.9 | 22.3 | 1.1  | 0.7 | -1.9 | 0.09 | 1.1  | 0.8  | -1.6 | 0.02 | -1.0 | 0.9  | 1.5  | 0.04 |
| P00501436   | YST3A3    | GDP-L-fucose synthase                                                | 100.0% | 7.0  | 1     | 1 | 1 | 1  | 2,651.580  | 2,757.783  | 3,489.300  | 3,093.083  | 167.468   | 197.601 | 419.532   | 341.929 | 14.1 | 15.5 | 26.9 | 24.7 | 1.0  | 0.7 | 1.3  | 0.1  | 1.2  | 0.3  | 1.3  | 0.2  | 1.1  | 0.4  | -1.1 | 0.5  |
| P005014048  | HUWE1B    | TPP1-like protein                                                    | 100.0% | 1.1  | 2     | 2 | 3 | 3  | 322.877    | 313.570    | 296.810    | 339.843    | 35.916    | 23.689  | 26.751    | 23.453  | 24.9 | 16.9 | 20.2 | 15.4 | -1.0 | 0.8 | -1.1 | 0.6  | 1.1  | 0.7  | -1.1 | 0.7  | 1.1  | 0.5  | 1.1  | 0.3  |
| P005014042  | FLJ1182   | cDNA FLJ20030.t1, clone: AD80U2156                                   | 100.0% | 1.1  | 1     | 1 | 2 | 3  | 322.877    | 313.570    |            |            |           |         |           |         |      |      |      |      |      |     |      |      |      |      |      |      |      |      |      |      |

















|           |        |                                                                                      |        |                             |    |        |    |   |            |            |            |            |           |           |           |         |      |      |      |      |      |      |      |      |     |      |      |       |     |      |      |      |  |
|-----------|--------|--------------------------------------------------------------------------------------|--------|-----------------------------|----|--------|----|---|------------|------------|------------|------------|-----------|-----------|-----------|---------|------|------|------|------|------|------|------|------|-----|------|------|-------|-----|------|------|------|--|
| P00019274 | UBXN6  | isoform 1 of UBX domain-containing protein 6                                         | 95.9%  | 3.9                         | 1  | 1      | 1  | 1 | 2,418,820  | 2,490,570  | 2,628,880  | 3,166,270  | 174,452   | 244,606   | 356,826   | 241,144 | 16.1 | 22.0 | 30.4 | 17.0 | 1.0  | 0.8  | 1.1  | 0.6  | 1.3 | 0.04 | 1.1  | 0.8   | 1.3 | 0.08 | 1.2  | 0.2  |  |
|           |        |                                                                                      |        | GGPTNADMAAALAL              | 2  | 95.9%  | 1  | 1 |            |            |            |            |           |           |           |         |      |      |      |      |      |      |      |      |     |      |      |       |     |      |      |      |  |
| P00019326 | DYNLL1 | Dynein light chain 1, cytoplasmic                                                    | 99.6%  |                             |    |        |    |   | 797,141    | 1,641,215  | 857,711    | 1,132,856  | 80,171    | 97,424    | 81,908    | 80,853  | 22.5 | 20.9 | 21.4 | 16.0 | 1.3  | 0.09 | 1.1  | 0.6  | 1.4 | 0.02 | -1.2 | 0.2   | 1.1 | 0.5  | 1.3  | 0.04 |  |
|           |        |                                                                                      |        | NAAMSEAEQSVVLCATQALEK       | 2  | 99.6%  | 1  | 1 |            |            |            |            |           |           |           |         |      |      |      |      |      |      |      |      |     |      |      |       |     |      |      |      |  |
| P00019352 | TSC2D1 | isoform 2 of TSC2 domain family protein 1                                            | 99.5%  | 8.3                         | 1  | 1      | 2  | 3 | 3,018,433  | 3,122,520  | 2,717,190  | 3,621,713  | 276,477   | 246,584   | 306,507   | 186,715 | 20.4 | 17.7 | 25.2 | 11.5 | 1.0  | 0.8  | -1.1 | 0.5  | 1.2 | 0.1  | -1.1 | 0.3   | 1.2 | 0.1  | 1.3  | 0.04 |  |
|           |        |                                                                                      |        | NSQLEGENLLK                 | 2  | 99.5%  | 2  | 3 |            |            |            |            |           |           |           |         |      |      |      |      |      |      |      |      |     |      |      |       |     |      |      |      |  |
| P00019356 | KRT19  | Keratin, type I cytoskeletal 9                                                       | 100.0% |                             |    |        |    |   | 29,823,822 | 31,756,488 | 30,815,937 | 34,556,086 | 2,342,262 | 1,204,862 | 1,553,013 | 945,750 | 17.8 | 8.5  | 11.3 | 6.1  | 1.1  | 0.5  | 1.0  | 0.7  | 1.2 | 0.1  | -1.0 | 0.6   | 1.1 | 0.1  | 1.1  | 0.07 |  |
|           |        |                                                                                      |        | DIENQYETQGTHERVSSSGQVSSAK   | 10 | 100.0% | 10 | 1 |            |            |            |            |           |           |           |         |      |      |      |      |      |      |      |      |     |      |      |       |     |      |      |      |  |
|           |        |                                                                                      |        | FEMEQNLKRGVADNGLRVDLNLMTKEK | 3  | 88.6%  | 1  | 1 |            |            |            |            |           |           |           |         |      |      |      |      |      |      |      |      |     |      |      |       |     |      |      |      |  |
|           |        |                                                                                      |        | GGSGGSGVGGGGGGGGGGGGGGSSGR  | 2  | 89.9%  | 2  | 1 |            |            |            |            |           |           |           |         |      |      |      |      |      |      |      |      |     |      |      |       |     |      |      |      |  |
|           |        |                                                                                      |        | HOVQEELEQSLSK               | 2  | 100.0% | 1  | 1 |            |            |            |            |           |           |           |         |      |      |      |      |      |      |      |      |     |      |      |       |     |      |      |      |  |
|           |        |                                                                                      |        | QGVADINGSLR                 | 2  | 99.9%  | 1  | 1 |            |            |            |            |           |           |           |         |      |      |      |      |      |      |      |      |     |      |      |       |     |      |      |      |  |
|           |        |                                                                                      |        | SGGSGGSGGGGGSSGR            | 2  | 100.0% | 1  | 1 |            |            |            |            |           |           |           |         |      |      |      |      |      |      |      |      |     |      |      |       |     |      |      |      |  |
|           |        |                                                                                      |        | STMOELNSR                   | 2  | 99.7%  | 1  | 1 |            |            |            |            |           |           |           |         |      |      |      |      |      |      |      |      |     |      |      |       |     |      |      |      |  |
|           |        |                                                                                      |        | TLLDINTR                    | 2  | 99.9%  | 1  | 1 |            |            |            |            |           |           |           |         |      |      |      |      |      |      |      |      |     |      |      |       |     |      |      |      |  |
|           |        |                                                                                      |        | TKAMNRDVEYQLEK              | 3  | 99.7%  | 1  | 1 |            |            |            |            |           |           |           |         |      |      |      |      |      |      |      |      |     |      |      |       |     |      |      |      |  |
|           |        |                                                                                      |        | VDQALEENLLENK               | 2  | 99.5%  | 1  | 1 |            |            |            |            |           |           |           |         |      |      |      |      |      |      |      |      |     |      |      |       |     |      |      |      |  |
| P00019376 | SEPT11 | isoform 2 of Septin-11                                                               | 100.0% | 18.2                        | 5  | 5      | 4  | 4 | 10,212,164 | 11,540,597 | 10,316,110 | 12,277,852 | 794,565   | 452,432   | 694,560   | 373,479 | 17.4 | 8.8  | 15.1 | 6.8  | 1.1  | 0.2  | 1.0  | 0.9  | 1.2 | 0.05 | -1.1 | 0.2   | 1.1 | 0.2  | 1.2  | 0.04 |  |
|           |        |                                                                                      |        | 18.7                        | 5  | 5      | 4  | 4 | 10,212,164 | 11,540,597 | 10,316,110 | 12,277,852 | 794,565   | 452,432   | 694,560   | 373,479 | 17.4 | 8.8  | 15.1 | 6.8  | 1.1  | 0.2  | 1.0  | 0.9  | 1.2 | 0.05 | -1.1 | 0.2   | 1.1 | 0.2  | 1.2  | 0.04 |  |
| P00019393 | SEPT11 | Uncharacterized protein                                                              | 100.0% | 18.8                        | 5  | 5      | 4  | 4 | 10,212,164 | 11,540,597 | 10,316,110 | 12,277,852 | 794,565   | 452,432   | 694,560   | 373,479 | 17.4 | 8.8  | 15.1 | 6.8  | 1.1  | 0.2  | 1.0  | 0.9  | 1.2 | 0.05 | -1.1 | 0.2   | 1.1 | 0.2  | 1.2  | 0.04 |  |
| P00067716 | SEPT11 | Uncharacterized protein                                                              | 100.0% | 18.5                        | 5  | 5      | 4  | 4 | 10,212,164 | 11,540,597 | 10,316,110 | 12,277,852 | 794,565   | 452,432   | 694,560   | 373,479 | 17.4 | 8.8  | 15.1 | 6.8  | 1.1  | 0.2  | 1.0  | 0.9  | 1.2 | 0.05 | -1.1 | 0.2   | 1.1 | 0.2  | 1.2  | 0.04 |  |
|           |        |                                                                                      |        | AAKGLDQGGSSGADQTK           | 3  | 100.0% | 1  | 1 |            |            |            |            |           |           |           |         |      |      |      |      |      |      |      |      |     |      |      |       |     |      |      |      |  |
|           |        |                                                                                      |        | EEEEENFNK                   | 2  | 99.6%  | 1  | 1 |            |            |            |            |           |           |           |         |      |      |      |      |      |      |      |      |     |      |      |       |     |      |      |      |  |
|           |        |                                                                                      |        | NLSLSGHVGFSLPQGLVNLK        | 3  | 98.1%  | 1  | 1 |            |            |            |            |           |           |           |         |      |      |      |      |      |      |      |      |     |      |      |       |     |      |      |      |  |
|           |        |                                                                                      |        | RNFVLEGEK                   | 3  | 95.2%  | 1  | 1 |            |            |            |            |           |           |           |         |      |      |      |      |      |      |      |      |     |      |      |       |     |      |      |      |  |
|           |        |                                                                                      |        | VNPIAKADITAKNELIK           | 2  | 85.5%  | 1  | 1 |            |            |            |            |           |           |           |         |      |      |      |      |      |      |      |      |     |      |      |       |     |      |      |      |  |
| P00019383 | GALK1  | cDNA FLJ35684, highly similar to Galactokinase                                       | 100.0% | 19.4                        | 5  | 5      | 3  | 3 | 8,146,524  | 8,595,907  | 8,017,143  | 9,033,120  | 770,557   | 357,979   | 693,268   | 279,854 | 21.2 | 9.3  | 19.3 | 6.9  | 1.1  | 0.8  | -1.0 | 0.9  | 1.1 | 0.3  | -1.1 | 0.5   | 1.1 | 0.4  | 1.1  | 0.2  |  |
| P00147223 | GALK1  | Uncharacterized protein                                                              | 100.0% | 19.4                        | 5  | 5      | 3  | 3 | 8,146,524  | 8,595,907  | 8,017,143  | 9,033,120  | 770,557   | 357,979   | 693,268   | 279,854 | 21.2 | 9.3  | 19.3 | 6.9  | 1.1  | 0.8  | -1.0 | 0.9  | 1.1 | 0.3  | -1.1 | 0.5   | 1.1 | 0.4  | 1.1  | 0.2  |  |
| P00340263 | GALK1  | Galactokinase                                                                        | 100.0% | 20.9                        | 5  | 5      | 3  | 3 | 8,146,524  | 8,595,907  | 8,017,143  | 9,033,120  | 770,557   | 357,979   | 693,268   | 279,854 | 21.2 | 9.3  | 19.3 | 6.9  | 1.1  | 0.8  | -1.0 | 0.9  | 1.1 | 0.3  | -1.1 | 0.5   | 1.1 | 0.4  | 1.1  | 0.2  |  |
|           |        |                                                                                      |        | AFREFEGAFELVLSAPGR          | 3  | 99.9%  | 1  | 1 |            |            |            |            |           |           |           |         |      |      |      |      |      |      |      |      |     |      |      |       |     |      |      |      |  |
|           |        |                                                                                      |        | AKVQQAQMSFSAQAGCMMQFSLMSQK  | 3  | 85.4%  | 1  | 1 |            |            |            |            |           |           |           |         |      |      |      |      |      |      |      |      |     |      |      |       |     |      |      |      |  |
|           |        |                                                                                      |        | EVQLEELAR                   | 2  | 100.0% | 1  | 1 |            |            |            |            |           |           |           |         |      |      |      |      |      |      |      |      |     |      |      |       |     |      |      |      |  |
|           |        |                                                                                      |        | HSLSSEYPR                   | 2  | 92.2%  | 1  | 1 |            |            |            |            |           |           |           |         |      |      |      |      |      |      |      |      |     |      |      |       |     |      |      |      |  |
|           |        |                                                                                      |        | QKQMLLAKR                   | 2  | 98.6%  | 1  | 1 |            |            |            |            |           |           |           |         |      |      |      |      |      |      |      |      |     |      |      |       |     |      |      |      |  |
| P00019386 | SSR4   | Translocin-associated protein subunit delta                                          | 100.0% | 6.4                         | 1  | 1      | 1  | 5 | 1,637,560  | 1,460,302  | 2,027,658  | 1,669,634  | 93,652    | 90,016    | 124,446   | 87,425  | 12.8 | 13.8 | 13.7 | 11.7 | -1.1 | 0.2  | 1.2  | 0.4  | 1.0 | 0.8  | 1.4  | 0.006 | 1.1 | 0.1  | -1.2 | 0.05 |  |
|           |        |                                                                                      |        | 9.2                         | 1  | 1      | 1  | 5 | 1,637,560  | 1,460,302  | 2,027,658  | 1,669,634  | 93,652    | 90,016    | 124,446   | 87,425  | 12.8 | 13.8 | 13.7 | 11.7 | -1.1 | 0.2  | 1.2  | 0.4  | 1.0 | 0.8  | 1.4  | 0.006 | 1.1 | 0.1  | -1.2 | 0.05 |  |
| P00049608 | SSR4   | Uncharacterized protein                                                              | 100.0% | 14                          | 1  | 1      | 1  | 5 | 1,637,560  | 1,460,302  | 2,027,658  | 1,669,634  | 93,652    | 90,016    | 124,446   | 87,425  | 12.8 | 13.8 | 13.7 | 11.7 | -1.1 | 0.2  | 1.2  | 0.4  | 1.0 | 0.8  | 1.4  | 0.006 | 1.1 | 0.1  | -1.2 | 0.05 |  |
| P01008877 | SSR4   | translocin-associated protein subunit delta isoform 3 precursor                      | 100.0% | 6.1                         | 1  | 1      | 1  | 5 | 1,637,560  | 1,460,302  | 2,027,658  | 1,669,634  | 93,652    | 90,016    | 124,446   | 87,425  | 12.8 | 13.8 | 13.7 | 11.7 | -1.1 | 0.2  | 1.2  | 0.4  | 1.0 | 0.8  | 1.4  | 0.006 | 1.1 | 0.1  | -1.2 | 0.05 |  |
| P01009057 | SSR4   | translocin-associated protein subunit delta isoform 1 precursor                      | 100.0% | 6.1                         | 1  | 1      | 1  | 5 | 1,637,560  | 1,460,302  | 2,027,658  | 1,669,634  | 93,652    | 90,016    | 124,446   | 87,425  | 12.8 | 13.8 | 13.7 | 11.7 | -1.1 | 0.2  | 1.2  | 0.4  | 1.0 | 0.8  | 1.4  | 0.006 | 1.1 | 0.1  | -1.2 | 0.05 |  |
|           |        |                                                                                      |        | FFDQVYSYLR                  | 2  | 100.0% | 1  | 1 |            |            |            |            |           |           |           |         |      |      |      |      |      |      |      |      |     |      |      |       |     |      |      |      |  |
| P00019407 | NSDHL  | Sterol-4-alpha-carboxylate 3-dehydrogenase, decarboxylating                          | 99.5%  | 5.1                         | 1  | 1      | 1  | 2 | 1,216,215  | 1,354,340  | 1,505,890  | 1,403,380  | 100,118   | 93,802    | 54,973    | 49,390  | 18.4 | 15.5 | 8.2  | 7.9  | 1.1  | 0.3  | 1.2  | 0.03 | 1.2 | 0.1  | 1.1  | 0.2   | 1.0 | 0.7  | -1.1 | 0.2  |  |
| P00046262 | NSDHL  | Uncharacterized protein                                                              | 99.5%  | 5.1                         | 1  | 1      | 1  | 2 | 1,216,215  | 1,354,340  | 1,505,890  | 1,403,380  | 100,118   | 93,802    | 54,973    | 49,390  | 18.4 | 15.5 | 8.2  | 7.9  | 1.1  | 0.3  | 1.2  | 0.03 | 1.2 | 0.1  | 1.1  | 0.2   | 1.0 | 0.7  | -1.1 | 0.2  |  |
|           |        |                                                                                      |        | GYAVNVDQGGDFPNQVPR          | 2  | 99.2%  | 1  | 1 |            |            |            |            |           |           |           |         |      |      |      |      |      |      |      |      |     |      |      |       |     |      |      |      |  |
| P00029796 | -      | cDNA FLJ13982, clone Y73AA100711, highly similar to 60 kDa SS-A/Ro ribonucleoprotein | 92.3%  | 2.3                         | 1  | 1      | 1  | 5 | 3,085,300  | 2,933,280  | 3,121,780  | 3,493,800  | 236,821   | 190,903   | 268,469   | 131,345 | 17.2 | 14.6 | 19.2 | 8.4  | -1.1 | 0.6  | 1.0  | 0.9  | 1.1 | 0.2  | 1.1  | 0.6   | 1.2 | 0.4  | 1.1  | 0.2  |  |
| P00019450 | TROVE2 | isoform Long of 60 kDa SS-A/Ro ribonucleoprotein                                     | 92.3%  | 2.4                         | 1  | 1      | 1  | 5 | 3,085,300  | 2,933,280  | 3,121,780  | 3,493,800  | 236,821   | 190,903   | 268,469   | 131,345 | 17.2 | 14.6 | 19.2 | 8.4  | -1.1 | 0.6  | 1.0  | 0.9  | 1.1 | 0.2  | 1.1  | 0.6   | 1.2 | 0.4  | 1.1  | 0.2  |  |
| P00042416 | TROVE2 | 60 kDa SS-A/Ro ribonucleoprotein isoform 4                                           | 92.3%  | 2.4                         | 1  | 1      | 1  | 5 | 3,085,300  | 2,933,280  | 3,121,780  | 3,493,800  | 236,821   | 190,903   | 268,469   | 131,345 | 17.2 | 14.6 | 19.2 | 8.4  | -1.1 | 0.6  | 1.0  | 0.9  | 1.1 | 0.2  | 1.1  | 0.6   | 1.2 | 0.4  | 1.1  | 0.2  |  |
| P00046322 | TROVE2 | 60 kDa SS-A/Ro ribonucleoprotein isoform 3</                                         |        |                             |    |        |    |   |            |            |            |            |           |           |           |         |      |      |      |      |      |      |      |      |     |      |      |       |     |      |      |      |  |





















|            |        |                                                                      |        |      |        |   |   |   |            |            |            |            |           |           |           |           |      |      |      |      |      |     |      |     |     |      |      |      |     |      |      |       |     |  |  |
|------------|--------|----------------------------------------------------------------------|--------|------|--------|---|---|---|------------|------------|------------|------------|-----------|-----------|-----------|-----------|------|------|------|------|------|-----|------|-----|-----|------|------|------|-----|------|------|-------|-----|--|--|
| P0002564   | VDAC2  | isoform 1 of Voltage-dependent anion-selective channel protein 2     | 100.0% | 24.9 | 6      | 6 | 8 | 5 | 7,381,040  | 7,442,197  | 6,995,972  | 8,339,088  | 601,286   | 352,947   | 587,670   | 217,527   | 18.2 | 10.6 | 18.8 | 5.8  | 1.0  | 0.9 | -1.1 | 0.7 | 1.1 | 0.2  | -1.1 | 0.5  | 1.1 | 0.06 | 1.2  | 0.08  |     |  |  |
| P00017420  | VDAC2  | isoform 2 of Voltage-dependent anion-selective channel protein 2     | 100.0% | 27.3 | 6      | 6 | 8 | 5 | 7,381,040  | 7,442,197  | 6,995,972  | 8,339,088  | 601,286   | 352,947   | 587,670   | 217,527   | 18.2 | 10.6 | 18.8 | 5.8  | 1.0  | 0.9 | -1.1 | 0.7 | 1.1 | 0.2  | -1.1 | 0.5  | 1.1 | 0.06 | 1.2  | 0.08  |     |  |  |
|            |        | LTFTFTTFTGK                                                          |        | 2    | 100.0% | 1 |   |   |            |            |            |            |           |           |           |           |      |      |      |      |      |     |      |     |     |      |      |      |     |      |      |       |     |  |  |
|            |        | LTSLAVDQK                                                            |        | 2    | 100.0% | 1 |   |   |            |            |            |            |           |           |           |           |      |      |      |      |      |     |      |     |     |      |      |      |     |      |      |       |     |  |  |
|            |        | NFAVAVYR                                                             |        | 2    | 99.2%  | 1 |   |   |            |            |            |            |           |           |           |           |      |      |      |      |      |     |      |     |     |      |      |      |     |      |      |       |     |  |  |
|            |        | TGQFLQYKWNQKFEFGSSGYSK                                               |        | 3    | 100.0% | 2 |   |   |            |            |            |            |           |           |           |           |      |      |      |      |      |     |      |     |     |      |      |      |     |      |      |       |     |  |  |
|            |        | WCKYGLTFLK                                                           |        | 2    | 99.3%  | 1 |   |   |            |            |            |            |           |           |           |           |      |      |      |      |      |     |      |     |     |      |      |      |     |      |      |       |     |  |  |
|            |        | YLDPTASIAK                                                           |        | 2    | 100.0% | 2 |   |   |            |            |            |            |           |           |           |           |      |      |      |      |      |     |      |     |     |      |      |      |     |      |      |       |     |  |  |
| P00024151  | FKBP3  | Peptidyl-prolyl cis-trans isomerase FKBP3                            | 100.0% | 11.0 | 5      | 6 | 1 |   | 43,847,190 | 50,109,650 | 44,286,810 | 54,791,830 | 4,909,084 | 2,561,521 | 3,085,715 | 1,030,475 | 25.0 | 11.4 | 15.6 | 4.2  | 1.1  | 0.3 | 1.0  | 0.9 | 1.2 | 0.9  | -1.1 | 0.2  | 1.1 | 0.1  | 1.2  | 0.02  |     |  |  |
|            |        | ARLEELPEAVYGGK                                                       |        | 3    | 87.7%  | 1 |   |   |            |            |            |            |           |           |           |           |      |      |      |      |      |     |      |     |     |      |      |      |     |      |      |       |     |  |  |
|            |        | AVTVEQER                                                             |        | 2    | 98.5%  | 1 |   |   |            |            |            |            |           |           |           |           |      |      |      |      |      |     |      |     |     |      |      |      |     |      |      |       |     |  |  |
|            |        | DAUKATYNNHETK                                                        |        | 3    | 87.3%  | 1 |   |   |            |            |            |            |           |           |           |           |      |      |      |      |      |     |      |     |     |      |      |      |     |      |      |       |     |  |  |
|            |        | GWDEALLTNSK                                                          |        | 2    | 100.0% | 2 |   |   |            |            |            |            |           |           |           |           |      |      |      |      |      |     |      |     |     |      |      |      |     |      |      |       |     |  |  |
|            |        | LEPEFVAYGK                                                           |        | 2    | 85.5%  | 1 |   |   |            |            |            |            |           |           |           |           |      |      |      |      |      |     |      |     |     |      |      |      |     |      |      |       |     |  |  |
| P00024161  | POLR3A | Similar to DNA-directed RNA polymerase                               | 99.7%  | 1    | 2      | 2 | 2 |   | 9,216,545  | 9,339,780  | 9,177,380  | 9,946,580  | 1,443,807 | 814,839   | 741,699   | 401,211   | 35.0 | 19.5 | 18.1 | 9.0  | 1.0  | 0.9 | -1.0 | 1   | 1   | 1    | 0.6  | -1.0 | 0.9 | 1.1  | 0.5  | 1.1   | 0.4 |  |  |
| P001015730 | POLR3A | DNA-directed RNA polymerase                                          | 99.7%  | 17   | 2      | 2 | 2 |   | 9,216,545  | 9,339,780  | 9,177,380  | 9,946,580  | 1,443,807 | 814,839   | 741,699   | 401,211   | 35.0 | 19.5 | 18.1 | 9.0  | 1.0  | 0.9 | -1.0 | 1   | 1   | 1    | 0.6  | -1.0 | 0.9 | 1.1  | 0.5  | 1.1   | 0.4 |  |  |
|            |        | RHWLLLSDLMTYK                                                        |        | 2    | 97.8%  | 1 |   |   |            |            |            |            |           |           |           |           |      |      |      |      |      |     |      |     |     |      |      |      |     |      |      |       |     |  |  |
|            |        | TVSSPQNA                                                             |        | 2    | 86.6%  | 1 |   |   |            |            |            |            |           |           |           |           |      |      |      |      |      |     |      |     |     |      |      |      |     |      |      |       |     |  |  |
| P00024173  | PSM7   | isoform 1 of Proteasome subunit alpha-type 7                         | 100.0% | 24.2 | 4      | 4 | 5 | 1 | 12,017,843 | 13,136,687 | 11,107,330 | 13,596,760 | 1,189,002 | 436,188   | 775,105   | 654,218   | 21.8 | 7.4  | 15.6 | 10.8 | 1.1  | 0.4 | -1.1 | 0.5 | 1.1 | 0.3  | -1.2 | 0.05 | 1.0 | 0.6  | 1.2  | 0.04  |     |  |  |
|            |        | GRDDVGLVEK                                                           |        | 2    | 99.7%  | 1 |   |   |            |            |            |            |           |           |           |           |      |      |      |      |      |     |      |     |     |      |      |      |     |      |      |       |     |  |  |
|            |        | ICALDQVQAFKALADAR                                                    |        | 2    | 97.8%  | 1 |   |   |            |            |            |            |           |           |           |           |      |      |      |      |      |     |      |     |     |      |      |      |     |      |      |       |     |  |  |
|            |        | LIVEDQVTVVYR                                                         |        | 2    | 100.0% | 1 |   |   |            |            |            |            |           |           |           |           |      |      |      |      |      |     |      |     |     |      |      |      |     |      |      |       |     |  |  |
|            |        | NYTDEATDGLTK                                                         |        | 2    | 100.0% | 2 |   |   |            |            |            |            |           |           |           |           |      |      |      |      |      |     |      |     |     |      |      |      |     |      |      |       |     |  |  |
| P00024252  | GPRKW  | G patch domain and KQW motifs-containing protein                     | 100.0% | 6    | 2      | 2 | 2 |   | 6,601,976  | 5,847,551  | 6,607,103  | 7,442,075  | 787,314   | 675,750   | 427,097   | 271,390   | 26.7 | 25.8 | 14.5 | 8.2  | -1.1 | 0.5 | 1.0  | 1   | 1   | 1    | 0.4  | 1.1  | 0.4 | 1.3  | 0.06 | 1.1   | 0.1 |  |  |
|            |        | GDGPAK                                                               |        | 1    | 95.9%  | 1 |   |   |            |            |            |            |           |           |           |           |      |      |      |      |      |     |      |     |     |      |      |      |     |      |      |       |     |  |  |
|            |        | QPPARPPGSDTGDALADQVSSVAK                                             |        | 3    | 85.3%  | 1 |   |   |            |            |            |            |           |           |           |           |      |      |      |      |      |     |      |     |     |      |      |      |     |      |      |       |     |  |  |
| P00024266  | MGST3  | Micromosomal glutathione S-transferase 3                             | 99.8%  | 1    | 1      | 1 | 3 |   | 1,151,963  | 1,190,363  | 1,083,913  | 1,292,343  | 113,132   | 96,289    | 117,867   | 43,426    | 22.0 | 18.1 | 24.3 | 7.5  | 1.0  | 0.8 | -1.1 | 0.7 | 1.1 | 0.3  | -1.1 | 0.5  | 1.1 | 0.4  | 1.2  | 0.2   |     |  |  |
| P000308172 | MGST3  | Micromosomal glutathione S-transferase 3                             | 99.8%  | 1    | 1      | 1 | 3 |   | 1,151,963  | 1,190,363  | 1,083,913  | 1,292,343  | 113,132   | 96,289    | 117,867   | 43,426    | 22.0 | 18.1 | 24.3 | 7.5  | 1.0  | 0.8 | -1.1 | 0.7 | 1.1 | 0.3  | -1.1 | 0.5  | 1.1 | 0.4  | 1.2  | 0.2   |     |  |  |
| P000470444 | MGST3  | Micromosomal glutathione S-transferase 3                             | 99.8%  | 10.1 | 1      | 1 | 3 |   | 1,151,963  | 1,190,363  | 1,083,913  | 1,292,343  | 113,132   | 96,289    | 117,867   | 43,426    | 22.0 | 18.1 | 24.3 | 7.5  | 1.0  | 0.8 | -1.1 | 0.7 | 1.1 | 0.3  | -1.1 | 0.5  | 1.1 | 0.4  | 1.2  | 0.2   |     |  |  |
|            |        | ISAGQAVAVYR                                                          |        | 2    | 99.6%  | 1 |   |   |            |            |            |            |           |           |           |           |      |      |      |      |      |     |      |     |     |      |      |      |     |      |      |       |     |  |  |
| P00024283  | HSP62  | Basement membrane-specific heparan sulfate proteoglycan core protein | 100.0% | 0.7  | 2      | 2 | 2 | 1 | 6,223,203  | 6,812,840  | 7,238,867  | 7,517,110  | 404,512   | 412,602   | 286,402   | 343,986   | 14.5 | 13.5 | 8.2  | 10.2 | 1.1  | 0.3 | 1.2  | 0.7 | 1.2 | 0.4  | 1.1  | 0.4  | 1.1 | 0.2  | 1.0  | 0.5   |     |  |  |
|            |        | AMDFNGLYR                                                            |        | 2    | 99.7%  | 1 |   |   |            |            |            |            |           |           |           |           |      |      |      |      |      |     |      |     |     |      |      |      |     |      |      |       |     |  |  |
|            |        | FLVRSKQVLPQGLNSK                                                     |        | 3    | 81.2%  | 1 |   |   |            |            |            |            |           |           |           |           |      |      |      |      |      |     |      |     |     |      |      |      |     |      |      |       |     |  |  |
| P00024307  | EFNB1  | Ephrin-B1                                                            | 96.7%  | 5.2  | 1      | 1 | 1 | 2 | 4,265,430  | 4,142,775  | 3,971,305  | 4,786,385  | 379,819   | 203,648   | 314,921   | 341,551   | 19.8 | 11.0 | 17.7 | 16.0 | -1.0 | 0.8 | -1.1 | 0.6 | 1.1 | 0.3  | -1.0 | 0.7  | 1.2 | 0.1  | 1.2  | 0.1   |     |  |  |
| P00076218  | EFNB1  | Conserved hypothetical protein                                       | 96.7%  | 25.0 | 1      | 1 | 1 | 2 | 4,265,430  | 4,142,775  | 3,971,305  | 4,786,385  | 379,819   | 203,648   | 314,921   | 341,551   | 19.8 | 11.0 | 17.7 | 16.0 | -1.0 | 0.8 | -1.1 | 0.6 | 1.1 | 0.3  | -1.0 | 0.7  | 1.2 | 0.1  | 1.2  | 0.1   |     |  |  |
|            |        | GSSTATERDQDLR                                                        |        | 2    | 98.7%  | 1 |   |   |            |            |            |            |           |           |           |           |      |      |      |      |      |     |      |     |     |      |      |      |     |      |      |       |     |  |  |
| P00024320  | RBM3   | Putative RNA-binding protein 3                                       | 100.0% | 47.8 | 4      | 4 | 4 | 1 | 32,680,877 | 34,796,480 | 32,021,120 | 40,202,620 | 1,892,089 | 774,029   | 1,573,597 | 1,403,143 | 13.0 | 5.0  | 11.0 | 7.8  | 1.1  | 0.3 | -1.0 | 0.8 | 1.2 | 0.01 | -1.1 | 0.2  | 1.2 | 0.01 | 1.3  | 0.006 |     |  |  |
|            |        | AMNGESLDR                                                            |        | 2    | 98.8%  | 1 |   |   |            |            |            |            |           |           |           |           |      |      |      |      |      |     |      |     |     |      |      |      |     |      |      |       |     |  |  |
|            |        | GFQFTTINRSVAMR                                                       |        | 3    | 99.4%  | 1 |   |   |            |            |            |            |           |           |           |           |      |      |      |      |      |     |      |     |     |      |      |      |     |      |      |       |     |  |  |
|            |        | LPVGLNFTDGALEDHFFSSPGIPSEVVVK                                        |        | 3    | 100.0% | 1 |   |   |            |            |            |            |           |           |           |           |      |      |      |      |      |     |      |     |     |      |      |      |     |      |      |       |     |  |  |
|            |        | YYDSRGGVYGYGVR                                                       |        | 3    | 99.0%  | 1 |   |   |            |            |            |            |           |           |           |           |      |      |      |      |      |     |      |     |     |      |      |      |     |      |      |       |     |  |  |
| P00024364  | TNP01  | isoform 1 of Transcription-1                                         | 100.0% | 6    | 6      | 7 | 7 | 3 | 14,070,977 | 14,985,752 | 15,260,412 | 16,849,815 | 1,604,821 | 492,856   | 1,419,968 | 1,129,656 | 25.5 | 7.4  | 20.8 | 15.0 | 1.1  | 0.6 | 1.1  | 0.6 | 1.2 | 0.2  | 1.0  | 0.9  | 1.1 | 0.2  | 1.1  | 0.4   |     |  |  |
| P00043876  | TNP01  | isoform 2 of Transcription-1                                         | 100.0% | 7.6  | 6      | 6 | 7 | 3 | 14,070,977 | 14,985,752 | 15,260,412 | 16,849,815 | 1,604,821 | 492,856   | 1,419,968 | 1,129,656 | 25.5 | 7.4  | 20.8 | 15.0 | 1.1  | 0.6 | 1.1  | 0.6 | 1.2 | 0.2  | 1.0  | 0.9  | 1.1 | 0.2  | 1.1  | 0.4   |     |  |  |
| P00090817  | TNP01  | isoform 3 of Transcription-1                                         | 100.0% | 7.6  | 6      | 6 | 7 | 3 | 14,070,977 | 14,985,752 | 15,260,412 | 16,849,815 | 1,604,821 | 492,856   | 1,419,968 | 1,129,656 | 25.5 | 7.4  | 20.8 | 15.0 | 1.1  | 0.6 | 1.1  | 0.6 | 1.2 | 0.2  | 1.0  | 0.9  | 1.1 | 0.2  | 1.1  | 0.4   |     |  |  |
|            |        | ALVIVLEIYR                                                           |        | 2    | 84.3%  | 1 |   |   |            |            |            |            |           |           |           |           |      |      |      |      |      |     |      |     |     |      |      |      |     |      |      |       |     |  |  |
|            |        | FSDFPLPK                                                             |        | 2    | 99.9%  | 1 |   |   |            |            |            |            |           |           |           |           |      |      |      |      |      |     |      |     |     |      |      |      |     |      |      |       |     |  |  |
|            |        | LHGFNKLQDGNWR                                                        |        | 3    | 84.2%  | 1 |   |   |            |            |            |            |           |           |           |           |      |      |      |      |      |     |      |     |     |      |      |      |     |      |      |       |     |  |  |
|            |        | QSSALGLDGLK                                                          |        | 2    | 99.9%  | 1 |   |   |            |            |            |            |           |           |           |           |      |      |      |      |      |     |      |     |     |      |      |      |     |      |      |       |     |  |  |
|            |        | TLENTAIGRR                                                           |        | 2    | 100.0% | 2 |   |   |            |            |            |            |           |           |           |           |      |      |      |      |      |     |      |     |     |      |      |      |     |      |      |       |     |  |  |





















|            |       |                                                                            |        |                             |   |        |    |           |           |           |            |            |         |         |         |         |      |      |      |      |      |      |      |      |      |       |      |      |      |      |      |     |     |     |     |     |  |
|------------|-------|----------------------------------------------------------------------------|--------|-----------------------------|---|--------|----|-----------|-----------|-----------|------------|------------|---------|---------|---------|---------|------|------|------|------|------|------|------|------|------|-------|------|------|------|------|------|-----|-----|-----|-----|-----|--|
| P00003201  | GMDS  | GDP-mannose 4.6 dehydroxylase                                              | 99.9%  | 9.1                         | 2 | 3      | 3  | 1         | 3,833,779 | 3,791,785 | 3,782,921  | 4,507,045  | 142,134 | 224,739 | 386,597 | 127,957 | 8.3  | 13.3 | 22.8 | 6.3  | -1.0 | 0.9  | -1.0 | 0.9  | 1.2  | 0.005 | -1.0 | 0.1  | 1.2  | 0.02 | 1.2  | 0.1 | 0.1 | 0.1 |     |     |  |
|            |       |                                                                            |        | ISGFALFYAVDVGIVGTR          | 2 | 99.6%  | 1  |           |           |           |            |            |         |         |         |         |      |      |      |      |      |      |      |      |      |       |      |      |      |      |      |     |     |     |     |     |  |
|            |       |                                                                            |        | VSOCAEITAVDVGIVGTR          | 3 | 99.5%  | 1  |           |           |           |            |            |         |         |         |         |      |      |      |      |      |      |      |      |      |       |      |      |      |      |      |     |     |     |     |     |  |
|            |       |                                                                            |        | VSOAEREITVFYR               | 3 | 97.2%  | 3  |           |           |           |            |            |         |         |         |         |      |      |      |      |      |      |      |      |      |       |      |      |      |      |      |     |     |     |     |     |  |
| P000218834 | NMT1  | isoform Short of Glycylproline N-tetradecanoyltransferase 1                | 100.0% | 3.4                         | 1 | 1      | 1  | 7         | 199,458   | 212,231   | 242,724    | 220,939    | 12,430  | 24,814  | 19,141  | 7,640   | 13.9 | 26.1 | 17.6 | 7.7  | 1.1  | 0.7  | 1.2  | 0.09 | 1.1  | 0.2   | 1.1  | 0.4  | 1.0  | 0.8  | -1.1 | 0.3 |     |     |     |     |  |
| P000218663 | NMT1  | isoform Long of Glycylproline N-tetradecanoyltransferase 1                 | 100.0% | 2.8                         | 1 | 1      | 1  | 7         | 199,458   | 212,231   | 242,724    | 220,939    | 12,430  | 24,814  | 19,141  | 7,640   | 13.9 | 26.1 | 17.6 | 7.7  | 1.1  | 0.7  | 1.2  | 0.09 | 1.1  | 0.2   | 1.1  | 0.4  | 1.0  | 0.8  | -1.1 | 0.3 |     |     |     |     |  |
| P000218622 | NMT2  | Glycylproline N-tetradecanoyltransferase 2                                 | 100.0% | 2.8                         | 1 | 1      | 1  | 7         | 199,458   | 212,231   | 242,724    | 220,939    | 12,430  | 24,814  | 19,141  | 7,640   | 13.9 | 26.1 | 17.6 | 7.7  | 1.1  | 0.7  | 1.2  | 0.09 | 1.1  | 0.2   | 1.1  | 0.4  | 1.0  | 0.8  | -1.1 | 0.3 |     |     |     |     |  |
| P000476269 | NMT2  | Glycylproline N-tetradecanoyltransferase 1                                 | 100.0% | 18.7                        | 1 | 1      | 1  | 7         | 199,458   | 212,231   | 242,724    | 220,939    | 12,430  | 24,814  | 19,141  | 7,640   | 13.9 | 26.1 | 17.6 | 7.7  | 1.1  | 0.7  | 1.2  | 0.09 | 1.1  | 0.2   | 1.1  | 0.4  | 1.0  | 0.8  | -1.1 | 0.3 |     |     |     |     |  |
| P000185824 | NMT2  | Uncharacterized protein                                                    | 100.0% | 18.7                        | 1 | 1      | 1  | 7         | 199,458   | 212,231   | 242,724    | 220,939    | 12,430  | 24,814  | 19,141  | 7,640   | 13.9 | 26.1 | 17.6 | 7.7  | 1.1  | 0.7  | 1.2  | 0.09 | 1.1  | 0.2   | 1.1  | 0.4  | 1.0  | 0.8  | -1.1 | 0.3 |     |     |     |     |  |
| P01010722  | NMT2  | Glycylproline N-tetradecanoyltransferase 2                                 | 100.0% | 2.9                         | 1 | 1      | 1  | 7         | 199,458   | 212,231   | 242,724    | 220,939    | 12,430  | 24,814  | 19,141  | 7,640   | 13.9 | 26.1 | 17.6 | 7.7  | 1.1  | 0.7  | 1.2  | 0.09 | 1.1  | 0.2   | 1.1  | 0.4  | 1.0  | 0.8  | -1.1 | 0.3 |     |     |     |     |  |
| P000115837 | NMT2  | Glycylproline N-tetradecanoyltransferase 1                                 | 100.0% | 4.5                         | 1 | 1      | 1  | 7         | 199,458   | 212,231   | 242,724    | 220,939    | 12,430  | 24,814  | 19,141  | 7,640   | 13.9 | 26.1 | 17.6 | 7.7  | 1.1  | 0.7  | 1.2  | 0.09 | 1.1  | 0.2   | 1.1  | 0.4  | 1.0  | 0.8  | -1.1 | 0.3 |     |     |     |     |  |
|            |       |                                                                            |        | GFVDFVDMLEMK                | 2 | 100.0% | 1  |           |           |           |            |            |         |         |         |         |      |      |      |      |      |      |      |      |      |       |      |      |      |      |      |     |     |     |     |     |  |
| P000002229 | GALE  | Uncharacterized protein                                                    | 100.0% | 22.5                        | 6 | 8      | 1  | 6,870,419 | 7,450,052 | 7,053,961 | 8,334,200  | 474,947    | 302,799 | 297,611 | 289,796 | 15.5    | 9.0  | 9.4  | 7.8  | 1.1  | 0.3  | 1.0  | 0.8  | 1.2  | 0.03 | -1.1  | 0.3  | 1.1  | 0.08 | 1.2  | 0.02 |     |     |     |     |     |  |
|            |       |                                                                            |        | DYHIVDLAK                   | 2 | 93.1%  | 1  |           |           |           |            |            |         |         |         |         |      |      |      |      |      |      |      |      |      |       |      |      |      |      |      |     |     |     |     |     |  |
|            |       |                                                                            |        | DYHIVDLAK                   | 3 | 99.7%  | 1  |           |           |           |            |            |         |         |         |         |      |      |      |      |      |      |      |      |      |       |      |      |      |      |      |     |     |     |     |     |  |
|            |       |                                                                            |        | EALNIFGNDYDFEDSTGRVHVHVDLAK | 2 | 100.0% | 1  |           |           |           |            |            |         |         |         |         |      |      |      |      |      |      |      |      |      |       |      |      |      |      |      |     |     |     |     |     |  |
|            |       |                                                                            |        | FRESKMI                     | 2 | 99.9%  | 1  |           |           |           |            |            |         |         |         |         |      |      |      |      |      |      |      |      |      |       |      |      |      |      |      |     |     |     |     |     |  |
|            |       |                                                                            |        | MCELDLR                     | 2 | 99.9%  | 1  |           |           |           |            |            |         |         |         |         |      |      |      |      |      |      |      |      |      |       |      |      |      |      |      |     |     |     |     |     |  |
|            |       |                                                                            |        | VNLTGTLLEMK                 | 2 | 100.0% | 2  |           |           |           |            |            |         |         |         |         |      |      |      |      |      |      |      |      |      |       |      |      |      |      |      |     |     |     |     |     |  |
| P000002043 | PSME3 | isoform 1 of Proteasome activator complex subunit 3                        | 100.0% | 4.1                         | 1 | 1      | 1  | 4         | 771,290   | 934,748   | 787,295    | 1,044,078  | 101,197 | 74,465  | 59,301  | 82,733  | 29.3 | 17.8 | 16.8 | 17.7 | 1.2  | 0.2  | 1.0  | 0.9  | 1.4  | 0.07  | -1.2 | 0.2  | 1.1  | 0.4  | 1.3  | 0.4 |     |     |     |     |  |
| P000219443 | PSME3 | isoform 2 of Proteasome activator complex subunit 3                        | 100.0% | 4.1                         | 1 | 1      | 1  | 4         | 771,290   | 934,748   | 787,295    | 1,044,078  | 101,197 | 74,465  | 59,301  | 82,733  | 29.3 | 17.8 | 16.8 | 17.7 | 1.2  | 0.2  | 1.0  | 0.9  | 1.4  | 0.07  | -1.2 | 0.2  | 1.1  | 0.4  | 1.3  | 0.4 |     |     |     |     |  |
| P000795743 | PSME3 | 15 kDa protein                                                             | 100.0% | 8.9                         | 1 | 1      | 1  | 4         | 771,290   | 934,748   | 787,295    | 1,044,078  | 101,197 | 74,465  | 59,301  | 82,733  | 29.3 | 17.8 | 16.8 | 17.7 | 1.2  | 0.2  | 1.0  | 0.9  | 1.4  | 0.07  | -1.2 | 0.2  | 1.1  | 0.4  | 1.3  | 0.4 |     |     |     |     |  |
| P000701908 | PSME3 | cDNA FLJ35265, highly similar to Proteasome activator co                   | 100.0% | 6.7                         | 1 | 1      | 1  | 4         | 771,290   | 934,748   | 787,295    | 1,044,078  | 101,197 | 74,465  | 59,301  | 82,733  | 29.3 | 17.8 | 16.8 | 17.7 | 1.2  | 0.2  | 1.0  | 0.9  | 1.4  | 0.07  | -1.2 | 0.2  | 1.1  | 0.4  | 1.3  | 0.4 |     |     |     |     |  |
|            |       |                                                                            |        | SNQDLVLEK                   | 2 | 99.5%  | 1  |           |           |           |            |            |         |         |         |         |      |      |      |      |      |      |      |      |      |       |      |      |      |      |      |     |     |     |     |     |  |
|            |       |                                                                            |        | IFONLNGSDVNLVK              | 5 | 5      | 7  | 1         | 9,300,982 | 9,396,298 | 11,644,142 | 10,343,275 | 543,605 | 452,287 | 554,628 | 581,433 | 29.3 | 10.8 | 10.7 | 11.9 | -1.1 | 0.5  | 1.2  | 0.06 | 1.1  | 0.2   | 1.2  | 0.02 | 1.1  | 0.7  | 1.1  | 0.1 | 0.1 | 0.1 | 0.1 | 0.1 |  |
|            |       |                                                                            |        | LVGPLEASPEAR                | 2 | 100.0% | 1  |           |           |           |            |            |         |         |         |         |      |      |      |      |      |      |      |      |      |       |      |      |      |      |      |     |     |     |     |     |  |
|            |       |                                                                            |        | LWNSFVGLSPREYR              | 2 | 100.0% | 2  |           |           |           |            |            |         |         |         |         |      |      |      |      |      |      |      |      |      |       |      |      |      |      |      |     |     |     |     |     |  |
|            |       |                                                                            |        | GVQVTEGKQLLR                | 2 | 100.0% | 1  |           |           |           |            |            |         |         |         |         |      |      |      |      |      |      |      |      |      |       |      |      |      |      |      |     |     |     |     |     |  |
|            |       |                                                                            |        | SEDYVELDR                   | 2 | 100.0% | 2  |           |           |           |            |            |         |         |         |         |      |      |      |      |      |      |      |      |      |       |      |      |      |      |      |     |     |     |     |     |  |
| P000002073 | TRAP1 | Heart shock protein 75 kDa, mitochondrial                                  | 99.8%  | 3.8                         | 2 | 2      | 2  | 2         | 4,742,825 | 5,006,605 | 4,835,145  | 5,203,380  | 377,255 | 176,166 | 328,711 | 139,373 | 17.8 | 7.8  | 16.2 | 6.0  | 1.1  | 0.5  | 1.0  | 0.9  | 1.1  | 0.3   | -1.0 | 0.7  | 1.0  | 0.4  | 1.1  | 0.3 |     |     |     |     |  |
| P000062602 | TRAP1 | cDNA FLJ35069, highly similar to heart shock protein 75 kDa, mitochondrial | 99.8%  | 4.2                         | 2 | 2      | 2  | 2         | 4,742,825 | 5,006,605 | 4,835,145  | 5,203,380  | 377,255 | 176,166 | 328,711 | 139,373 | 17.8 | 7.8  | 16.2 | 6.0  | 1.1  | 0.5  | 1.0  | 0.9  | 1.1  | 0.3   | -1.0 | 0.7  | 1.0  | 0.4  | 1.1  | 0.3 |     |     |     |     |  |
|            |       |                                                                            |        | ARLDNGLAASASK               | 2 | 98.7%  | 1  |           |           |           |            |            |         |         |         |         |      |      |      |      |      |      |      |      |      |       |      |      |      |      |      |     |     |     |     |     |  |
|            |       |                                                                            |        | ELNSASDLK                   | 2 | 98.5%  | 1  |           |           |           |            |            |         |         |         |         |      |      |      |      |      |      |      |      |      |       |      |      |      |      |      |     |     |     |     |     |  |
| P000000298 | E1F42 | Eukaryotic translation initiation factor 4A, isoform 2                     | 100.0% | 1                           | 1 | 1      | 1  | 4,287,453 | 5,114,150 | 4,500,325 | 5,881,875  | 968,376    | 827,310 | 500,815 | 593,171 | 50.4    | 34.8 | 29.8 | 22.6 | 1.2  | 0.4  | 1.0  | 0.2  | -1.1 | 0.4  | 1.1   | 0.6  | 1.1  | 0.6  | 1.1  | 0.1  | 0.1 |     |     |     |     |  |
|            |       |                                                                            |        | LQAEAPHVVGTRP               | 3 | 99.9%  | 1  |           |           |           |            |            |         |         |         |         |      |      |      |      |      |      |      |      |      |       |      |      |      |      |      |     |     |     |     |     |  |
|            |       |                                                                            |        | ITDLSGDMATAK                | 2 | 100.0% | 2  |           |           |           |            |            |         |         |         |         |      |      |      |      |      |      |      |      |      |       |      |      |      |      |      |     |     |     |     |     |  |
|            |       |                                                                            |        | QAVMEMMSQK                  | 2 | 99.7%  | 1  |           |           |           |            |            |         |         |         |         |      |      |      |      |      |      |      |      |      |       |      |      |      |      |      |     |     |     |     |     |  |
| P000003029 | DDX6  | Probable ATP-dependent RNA helicase DDX6                                   | 100.0% | 7.3                         | 2 | 2      | 2  | 2         | 2,813,320 | 3,278,875 | 2,893,330  | 3,708,915  | 220,073 | 320,258 | 236,692 | 288,143 | 18.8 | 21.8 | 18.6 | 17.4 | 1.3  | 0.1  | 1.1  | 0.5  | 1.4  | 0.02  | -1.1 | 0.3  | 1.1  | 0.3  | 1.3  | 0.5 |     |     |     |     |  |
| P000015261 | DDX6  | DDX6 protein                                                               | 100.0% | 18.7                        | 2 | 2      | 2  | 2         | 2,813,320 | 3,278,875 | 2,893,330  | 3,708,915  | 220,073 | 320,258 | 236,692 | 288,143 | 18.8 | 21.8 | 18.6 | 17.4 | 1.3  | 0.1  | 1.1  | 0.5  | 1.4  | 0.02  | -1.1 | 0.3  | 1.1  | 0.3  | 1.3  | 0.5 |     |     |     |     |  |
|            |       |                                                                            |        | GVPKVPTGGPQGGTQDQGMNLG      | 3 | 99.6%  | 1  |           |           |           |            |            |         |         |         |         |      |      |      |      |      |      |      |      |      |       |      |      |      |      |      |     |     |     |     |     |  |
|            |       |                                                                            |        | SGAYLPLLR                   | 2 | 99.1%  | 1  |           |           |           |            |            |         |         |         |         |      |      |      |      |      |      |      |      |      |       |      |      |      |      |      |     |     |     |     |     |  |
| P000003031 | DLG1  | isoform 1 of Disks large homolog 1                                         | 93.3%  | 1                           | 1 | 1      | 12 | 634,649   | 662,979   | 582,281   | 747,578    | 64,337     | 53,936  | 61,299  | 64,302  | 22.7    | 18.2 | 23.5 | 19.2 | 1.0  | 0.7  | -1.1 | 0.6  | 1.2  | 0.2  | -1.1  | 0.4  | 1.1  | 0.3  | 1.3  | 0.1  | 0.1 |     |     |     |     |  |
| P000218729 | DLG1  | isoform 2 of Disks large homolog 1                                         | 93.3%  | 1.3                         | 1 | 1      | 1  | 12        | 634,649   | 662,979   | 582,281    | 747,578    | 64,337  | 53,936  | 61,299  | 64,302  | 22.7 | 18.2 | 23.5 | 19.2 | 1.0  | 0.7  | -1.1 | 0.6  | 1.2  | 0.2   | -1.1 | 0.4  | 1.1  | 0.3  | 1.3  | 0.1 | 0.1 |     |     |     |  |
| P000552213 | DLG1  | isoform 3 of Disks large homolog 1                                         | 93.3%  | 1.4                         | 1 | 1      | 1  | 12        | 634,649   | 662,979   | 582,281    | 747,578    | 64,337  | 53,936  | 61,299  |         |      |      |      |      |      |      |      |      |      |       |      |      |      |      |      |     |     |     |     |     |  |



|            |          |                                                                       |        |      |    |    |    |            |            |            |            |           |           |           |           |         |      |      |      |      |      |      |      |     |      |      |      |     |      |      |       |       |
|------------|----------|-----------------------------------------------------------------------|--------|------|----|----|----|------------|------------|------------|------------|-----------|-----------|-----------|-----------|---------|------|------|------|------|------|------|------|-----|------|------|------|-----|------|------|-------|-------|
| P00031107  | HSD2     | isoform 2 of Hydroxysteroid dehydrogenase-like protein 2              | 99.6%  | 5.2  | 1  | 1  | 1  | 1          | 2,963,645  | 2,747,620  | 3,284,945  | 3,192,515 | 112,179   | 133,993   | 253,400   | 200,893 | 8.5  | 10.9 | 17.3 | 14.1 | -1.1 | 0.3  | 1.1  | 0.3 | 1.1  | 0.3  | 1.2  | 0.1 | 1.2  | 0.1  | -1.0  | 0.8   |
| P00031131  | C20orf9  | isoform 1 of Adipocyte plasma membrane-associated protein             | 99.9%  | 2.9  | 1  | 1  | 1  | 3          | 1,335,740  | 1,126,653  | 1,157,300  | 1,171,897 | 164,469   | 55,239    | 100,664   | 46,819  | 24.2 | 11.0 | 19.5 | 8.9  | -1.2 | 0.2  | -1.2 | 0.3 | -1.1 | 0.3  | 1.0  | 0.8 | 1.0  | 0.5  | 1.0   | 0.9   |
| P000791304 | C20orf9  | Chromosome 20 open reading frame 3                                    | 99.9%  | 2.9  | 1  | 1  | 1  | 3          | 1,335,740  | 1,126,653  | 1,157,300  | 1,171,897 | 144,469   | 55,239    | 100,664   | 46,819  | 24.2 | 11.0 | 19.5 | 8.9  | -1.2 | 0.2  | -1.2 | 0.3 | -1.1 | 0.3  | 1.0  | 0.8 | 1.0  | 0.5  | 1.0   | 0.9   |
| P000929530 | C20orf9  | isoform 2 of Adipocyte plasma membrane-associated protein             | 99.9%  | 4.2  | 1  | 1  | 1  | 3          | 1,335,740  | 1,126,653  | 1,157,300  | 1,171,897 | 144,469   | 55,239    | 100,664   | 46,819  | 24.2 | 11.0 | 19.5 | 8.9  | -1.2 | 0.2  | -1.2 | 0.3 | -1.1 | 0.3  | 1.0  | 0.8 | 1.0  | 0.5  | 1.0   | 0.9   |
| P000311169 | RAB2A    | Ras-related protein Rab-2A                                            | 100.0% | 32.1 | 2  | 5  | 1  | 6,501,595  | 6,379,691  | 6,772,372  | 7,039,605  | 435,851   | 239,152   | 489,159   | 389,820   | 15.0    | 8.4  | 16.4 | 12.4 | -1.0 | 0.8  | 1.0  | 0.8  | 1.1 | 0.4  | 1.0  | 0.6  | 1.1 | 0.2  | 1.1  | 0.6   |       |
| P000312442 | SEC16A   | isoform 5 of Protein transport protein Sec16A                         | 100.0% | 1.1  | 2  | 2  | 5  | 2,993,740  | 3,519,962  | 2,907,086  | 3,907,834  | 419,060   | 327,309   | 148,323   | 175,776   | 31.3    | 20.8 | 11.4 | 10.1 | 1.2  | 0.4  | -1.0 | 0.9  | 1.3 | 0.68 | -1.2 | 0.1  | 1.1 | 0.3  | 1.3  | 0.002 |       |
| P001064647 | SEC16A   | isoform 3 of Protein transport protein Sec16A                         | 100.0% | 1.1  | 2  | 2  | 5  | 2,993,740  | 3,519,962  | 2,907,086  | 3,907,834  | 419,060   | 327,309   | 148,323   | 175,776   | 31.3    | 20.8 | 11.4 | 10.1 | 1.2  | 0.4  | -1.0 | 0.9  | 1.3 | 0.68 | -1.2 | 0.1  | 1.1 | 0.3  | 1.3  | 0.002 |       |
| P002192914 | SEC16A   | isoform 2 of Protein transport protein Sec16A                         | 100.0% | 1.1  | 2  | 2  | 5  | 2,993,740  | 3,519,962  | 2,907,086  | 3,907,834  | 419,060   | 327,309   | 148,323   | 175,776   | 31.3    | 20.8 | 11.4 | 10.1 | 1.2  | 0.4  | -1.0 | 0.9  | 1.3 | 0.68 | -1.2 | 0.1  | 1.1 | 0.3  | 1.3  | 0.002 |       |
| P00041384  | SEC16A   | protein transport protein Sec16A                                      | 100.0% | 1.1  | 2  | 2  | 5  | 2,993,740  | 3,519,962  | 2,907,086  | 3,907,834  | 419,060   | 327,309   | 148,323   | 175,776   | 31.3    | 20.8 | 11.4 | 10.1 | 1.2  | 0.4  | -1.0 | 0.9  | 1.3 | 0.68 | -1.2 | 0.1  | 1.1 | 0.3  | 1.3  | 0.002 |       |
| P000896438 | SEC16A   | isoform 4 of Protein transport protein Sec16A                         | 100.0% | 1.1  | 2  | 2  | 5  | 2,993,740  | 3,519,962  | 2,907,086  | 3,907,834  | 419,060   | 327,309   | 148,323   | 175,776   | 31.3    | 20.8 | 11.4 | 10.1 | 1.2  | 0.4  | -1.0 | 0.9  | 1.3 | 0.68 | -1.2 | 0.1  | 1.1 | 0.3  | 1.3  | 0.002 |       |
| P00031370  | TUBB2B   | Tubulin beta-2B chain                                                 | 100.0% | 41.8 | 9  | 11 | 16 | 35,615,661 | 34,158,852 | 36,245,437 | 41,018,723 | 3,626,870 | 1,576,262 | 3,147,255 | 1,608,418 | 24.0    | 10.3 | 19.4 | 8.8  | -1.0 | 0.7  | 1.0  | 0.9  | 1.2 | 0.2  | 1.1  | 0.6  | 1.2 | 0.02 | 1.1  | 0.2   |       |
| P00031420  | UGDH     | UDP-glucose 6-dehydrogenase                                           | 100.0% | 48.0 | 16 | 18 | 21 | 44,072,260 | 45,043,466 | 45,007,427 | 50,097,221 | 2,639,204 | 1,344,633 | 2,798,245 | 1,291,057 | 13.4    | 6.7  | 13.9 | 5.8  | 1.0  | 0.8  | 1.0  | 0.8  | 1.1 | 0.07 | -1.0 | 1    | 1.1 | 0.03 | 1.1  | 0.1   | 0.1   |
| P00031461  | GD2      | cDNA FL_802299, highly similar to Rab GDP dissociation inhibitor beta | 100.0% | 55.2 | 27 | 27 | 37 | 50,628,630 | 54,206,300 | 50,761,648 | 61,506,155 | 6,676,444 | 3,056,863 | 4,606,549 | 1,602,792 | 29.5    | 12.8 | 20.3 | 5.8  | 1.1  | 0.6  | 1.0  | 1    | 1.2 | 0.2  | -1.1 | 0.6  | 1.1 | 0.07 | 1.2  | 0.08  |       |
| P000949148 | GD2      | Rab GDP dissociation inhibitor beta                                   | 100.0% | 55.7 | 27 | 27 | 37 | 50,628,630 | 54,206,300 | 50,761,648 | 61,506,155 | 6,676,444 | 3,056,863 | 4,606,549 | 1,602,792 | 29.5    | 12.8 | 20.3 | 5.8  | 1.1  | 0.6  | 1.0  | 1    | 1.2 | 0.2  | -1.1 | 0.6  | 1.1 | 0.07 | 1.2  | 0.08  |       |
| P00031517  | MCMB     | DNA replication licensing factor MCM8                                 | 99.1%  | 3.1  | 3  | 3  | 3  | 14,709,485 | 14,780,238 | 15,053,880 | 16,362,520 | 856,420   | 930,223   | 1,042,089 | 683,790   | 13.0    | 14.1 | 15.5 | 9.5  | 1.0  | 1    | 1.0  | 0.8  | 1.1 | 0.2  | 1.0  | 0.8  | 1.1 | 0.2  | 1.1  | 0.3   |       |
| P00031522  | HADHA    | Trifunctional enzyme subunit alpha, mitochondrial                     | 100.0% | 28.4 | 16 | 17 | 18 | 68,808,814 | 70,065,672 | 66,756,663 | 75,463,362 | 6,846,897 | 2,910,025 | 4,310,957 | 2,526,041 | 22.3    | 9.3  | 14.4 | 7.5  | 1.0  | 0.9  | -1.0 | 0.8  | 1.1 | 0.4  | -1.0 | 0.5  | 1.1 | 0.2  | 1.1  | 0.1   | 0.1   |
| P00031549  | ITPR2    | isoform Long of Inositol 1,4,5-trisphosphate receptor type 2          | 94.7%  | 1.3  | 1  | 1  | 1  | 6,962,660  | 7,194,270  | 6,672,960  | 7,907,590  | 772,392   | 262,528   | 460,939   | 400,252   | 24.8    | 8.2  | 15.5 | 11.3 | 1.0  | 0.8  | -1.0 | 0.8  | 1.1 | 0.3  | -1.1 | 0.4  | 1.1 | 0.2  | 1.2  | 0.08  |       |
| P00031556  | UZAF2    | isoform 1 of splicing factor UZAF 68 kDa subunit                      | 100.0% | 24.1 | 8  | 9  | 11 | 22,422,809 | 26,336,989 | 29,641,831 | 28,716,600 | 1,800,651 | 1,203,360 | 1,386,962 | 1,735,686 | 15.8    | 16.2 | 10.5 | 13.5 | 1.0  | 0.7  | 1.2  | 0.1  | 1.1 | 0.2  | -1.1 | 0.4  | 1.1 | 0.3  | -1.0 | 0.7   |       |
| P000320039 | UZAF2    | isoform 2 of Splicing factor UZAF 68 kDa subunit                      | 100.0% | 24.6 | 8  | 9  | 11 | 22,422,809 | 26,336,989 | 29,641,831 | 28,716,600 | 1,800,651 | 1,203,360 | 1,386,962 | 1,735,686 | 15.8    | 16.2 | 10.5 | 13.5 | 1.0  | 0.7  | 1.2  | 0.1  | 1.1 | 0.2  | -1.1 | 0.4  | 1.1 | 0.3  | -1.0 | 0.7   |       |
| P000315529 | C19orf43 | Uncharacterized protein C19orf43                                      | 92.9%  | 6.8  | 1  | 1  | 1  | 15,678,500 | 15,423,300 | 14,306,300 | 18,000,800 | 1,599,086 | 1,047,162 | 1,038,237 | 677,895   | 22.8    | 15.2 | 16.2 | 8.4  | -1.0 | 0.9  | -1.1 | 0.5  | 1.1 | 0.2  | -1.1 | 0.5  | 1.2 | 0.07 | 1.3  | 0.02  |       |
| P00031560  | CTH      | isoform 2 of Cystathionine gamma-lyase                                | 99.9%  | 4.9  | 1  | 1  | 3  | 210,299    | 255,588    | 250,325    | 256,374    | 27,986    | 35,663    | 45,936    | 31,899    | 29.8    | 31.2 | 41.0 | 27.8 | 1.2  | 0.3  | 1.2  | 0.5  | 1.2 | 0.3  | -1.0 | 0.9  | 1.0 | 1    | 1.0  | 0.8   |       |
| P00095812  | CTH      | cystathionine gamma-lyase isoform 3                                   | 99.9%  | 5.4  | 1  | 1  | 3  | 210,299    | 255,588    | 250,325    | 256,374    | 27,986    | 35,663    | 45,936    | 31,899    | 29.8    | 31.2 | 41.0 | 27.8 | 1.2  | 0.3  | 1.2  | 0.5  | 1.2 | 0.3  | -1.0 | 0.9  | 1.0 | 1    | 1.0  | 0.8   |       |
| P00031564  | GGCT     | isoform 1 of Gamma-glutamylcyclotransferase                           | 100.0% | 11   | 4  | 4  | 4  | 6,803,953  | 7,333,498  | 6,716,153  | 8,311,240  | 938,449   | 377,963   | 528,455   | 250,664   | 30.8    | 11.5 | 17.8 | 6.7  | 1.1  | 0.8  | -1.0 | 0.9  | 1.2 | 0.2  | -1.1 | 0.4  | 1.1 | 0.06 | 1.2  | 0.03  |       |
| P00031574  | NTPCR    | Cancer-related nucleoside-triphosphatase                              | 98.8%  | 6.3  | 1  | 1  | 1  | 2          | 1,974,895  | 2,145,420  | 2,138,680  | 2,006,030 | 187,688   | 187,804   | 116,446   | 181,593 | 21.3 | 11.2 | 12.2 | 18.0 | 1.1  | 0.5  | 1.1  | 0.5 | 1.0  | 0.9  | -1.0 | 1   | -1.1 | 0.5  | -1.1  | 0.5   |
| P00031583  | USO1     | isoform 2 of General vesicular transport factor p115                  | 100.0% | 20.3 | 14 | 14 | 14 | 23,188,172 | 26,016,810 | 22,627,995 | 27,841,979 | 2,210,588 | 1,083,115 | 1,425,343 | 854,929   | 21.3    | 9.7  | 14.1 | 6.9  | 1.1  | 0.5  | -1.0 | 0.8  | 1.0 | 0.1  | -1.1 | 0.2  | 1.1 | 0.1  | 1.2  | 0.02  |       |
| P00041161  | USO1     | isoform 1 of General vesicular transport factor p115                  | 100.0% | 21.5 | 14 | 14 | 14 | 23,188,172 | 26,016,810 | 22,627,995 | 27,841,979 | 2,210,588 | 1,083,115 | 1,425,343 | 854,929   | 21.3    | 9.7  | 14.1 | 6.9  | 1.1  | 0.5  | -1.0 | 0.8  | 1.0 | 0.1  | -1.1 | 0.2  | 1.1 | 0.1  | 1.2  | 0.02  |       |
| P00031608  | SPATASL1 | isoform 1 of Spermatogenesis-associated protein 5-like protein 1      | 93.7%  | 10.1 | 1  | 1  | 1  | 2          | 1,762,025  | 1,826,815  | 1,631,320  | 2,223,605 | 142,602   | 139,687   | 122,752   | 93,963  | 18.1 | 17.1 | 16.8 | 9.5  | 1.0  | 0.8  | -1.1 | 0.5 | 1.3  | 0.03 | -1.1 | 0.3 | 1.2  | 0.05 | 1.4   | 0.005 |
| P01012737  | SPATASL1 | Protein                                                               | 93.7%  | 10.1 | 1  | 1  | 1  | 2          | 1,762,025  | 1,826,815  | 1,631,320  | 2,223,605 | 142,602   | 139,687   | 122,752   | 93,963  | 18.1 | 17.1 | 16.8 | 9.5  | 1.0  | 0.8  | -1.1 | 0.5 | 1.3  | 0.03 | -1.1 | 0.3 | 1.2  | 0.05 | 1.4   | 0.005 |





|            |           |                                                                                 |        |      |        |   |         |           |            |            |            |            |           |         |           |         |      |      |      |      |      |     |      |      |      |      |      |     |     |      |     |      |      |  |  |
|------------|-----------|---------------------------------------------------------------------------------|--------|------|--------|---|---------|-----------|------------|------------|------------|------------|-----------|---------|-----------|---------|------|------|------|------|------|-----|------|------|------|------|------|-----|-----|------|-----|------|------|--|--|
| P00219031  | H2AFX     | Histone H2a x                                                                   | 100.0% | 32.2 | 5      | 7 | 12      | 2         | 17,339,182 | 18,190,289 | 18,135,744 | 21,521,502 | 1,556,739 | 694,505 | 1,426,255 | 871,651 | 20.1 | 8.5  | 17.6 | 9.1  | 1.0  | 0.6 | 1.0  | 0.7  | 1.2  | 0.05 | -1.0 | 1   | 1.2 | 0.02 | 1.2 | 0.08 |      |  |  |
| P00045109  | HIST1H2AA | Histone H2A type 1-A                                                            | 100.0% | 35.1 | 5      | 7 | 12      | 2         | 17,339,182 | 18,190,289 | 18,135,744 | 21,521,502 | 1,556,739 | 694,505 | 1,426,255 | 871,651 | 20.1 | 8.5  | 17.6 | 9.1  | 1.0  | 0.6 | 1.0  | 0.7  | 1.2  | 0.05 | -1.0 | 1   | 1.2 | 0.02 | 1.2 | 0.08 |      |  |  |
|            |           | ADGPPRGR                                                                        |        | 2    | 100.0% | 2 |         |           |            |            |            |            |           |         |           |         |      |      |      |      |      |     |      |      |      |      |      |     |     |      |     |      |      |  |  |
|            |           | FLOLQR                                                                          |        | 2    | 100.0% | 2 |         |           |            |            |            |            |           |         |           |         |      |      |      |      |      |     |      |      |      |      |      |     |     |      |     |      |      |  |  |
|            |           | LLGGVTRAGGGLPRDQAVLLPK                                                          |        | 2    | 100.0% | 2 |         |           |            |            |            |            |           |         |           |         |      |      |      |      |      |     |      |      |      |      |      |     |     |      |     |      |      |  |  |
|            |           | LLGGVTRAGGGLPRDQAVLLPK                                                          |        | 3    | 100.0% | 1 |         |           |            |            |            |            |           |         |           |         |      |      |      |      |      |     |      |      |      |      |      |     |     |      |     |      |      |  |  |
|            |           | NDELKALQSGVTRAGGGLPRDQAVLLPK                                                    |        | 3    | 100.0% | 1 |         |           |            |            |            |            |           |         |           |         |      |      |      |      |      |     |      |      |      |      |      |     |     |      |     |      |      |  |  |
|            |           | VTRAGGGLPRDQAVLLPK                                                              |        | 2    | 100.0% | 2 |         |           |            |            |            |            |           |         |           |         |      |      |      |      |      |     |      |      |      |      |      |     |     |      |     |      |      |  |  |
| P00045369  | CIC       | Protein capsua homolog                                                          | 99.7%  | 2.1  | 1      | 1 | 1       | 1         | 0,040,300  | 9,522,430  | 9,144,260  | 11,880,290 | 2,162,821 | 903,341 | 1,469,056 | 762,966 | 53.5 | 21.2 | 35.9 | 14.4 | 1.1  | 0.8 | 1.0  | 1    | 1.3  | 0.3  | -1.0 | 0.8 | 1.2 | 0.08 | 1.3 | 0.1  |      |  |  |
| P00045398  | CALU      | isoform 2 of Calumenin                                                          | 100.0% | 21   | 5      | 5 | 5       | 2         | 8,019,624  | 7,908,332  | 7,768,817  | 8,902,779  | 568,718   | 302,284 | 403,663   | 225,118 | 15.8 | 8.6  | 11.6 | 5.7  | -1.0 | 0.9 | -1.0 | 0.7  | 1.1  | 0.2  | -1.0 | 0.8 | 1.1 | 0.03 | 1.1 | 0.04 |      |  |  |
| P00092478  | CALU      | calumenin isoform d precursor                                                   | 100.0% | 26.0 | 5      | 5 | 5       | 2         | 8,019,624  | 7,908,332  | 7,768,817  | 8,902,779  | 568,718   | 302,284 | 403,663   | 225,118 | 15.8 | 8.6  | 11.6 | 5.7  | -1.0 | 0.9 | -1.0 | 0.7  | 1.1  | 0.2  | -1.0 | 0.8 | 1.1 | 0.03 | 1.1 | 0.04 |      |  |  |
|            |           | EENYDKYLVYVYSGQITDFGEALVR                                                       |        | 3    | 100.0% | 1 |         |           |            |            |            |            |           |         |           |         |      |      |      |      |      |     |      |      |      |      |      |     |     |      |     |      |      |  |  |
|            |           | HLVYVSSQWGR                                                                     |        | 3    | 100.0% | 1 |         |           |            |            |            |            |           |         |           |         |      |      |      |      |      |     |      |      |      |      |      |     |     |      |     |      |      |  |  |
|            |           | LGVMVQKADKDGVTVEGELK                                                            |        | 3    | 99.9%  | 1 |         |           |            |            |            |            |           |         |           |         |      |      |      |      |      |     |      |      |      |      |      |     |     |      |     |      |      |  |  |
|            |           | MADKQSDLAIK                                                                     |        | 2    | 98.1%  | 1 |         |           |            |            |            |            |           |         |           |         |      |      |      |      |      |     |      |      |      |      |      |     |     |      |     |      |      |  |  |
|            |           | TFDQKTFRESKER                                                                   |        | 3    | 99.6%  | 1 |         |           |            |            |            |            |           |         |           |         |      |      |      |      |      |     |      |      |      |      |      |     |     |      |     |      |      |  |  |
| P00045663  | C1orf31   | isoform 1 of Uncharacterized protein C1orf31                                    | 91.7%  | 15.4 | 1      | 1 | 4       | 1,624,273 | 1,760,980  | 1,662,475  | 1,907,338  | 234,016    | 119,528   | 146,175 | 141,964   | 32.2    | 15.2 | 19.7 | 16.6 | 1.1  | 0.8  | 1.0 | 0.9  | 1.2  | 0.3  | -1.1 | 0.6  | 1.1 | 0.5 | 1.1  | 0.1 | 0.1  | 0.3  |  |  |
| P00052131  | C1orf31   | DNM1FLJ6021, moderately similar to Proton transport protein SecE1 subunit alpha | 91.7%  | 8.4  | 1      | 1 | 1       | 1,624,273 | 1,760,980  | 1,662,475  | 1,907,338  | 234,016    | 119,528   | 146,175 | 141,964   | 32.2    | 15.2 | 19.7 | 16.6 | 1.1  | 0.8  | 1.0 | 0.9  | 1.2  | 0.3  | -1.1 | 0.6  | 1.1 | 0.5 | 1.1  | 0.1 | 0.1  | 0.3  |  |  |
| P00066796  | C1orf31   | isoform 2 of Uncharacterized protein C1orf31                                    | 91.7%  | 16.5 | 1      | 1 | 1       | 1,624,273 | 1,760,980  | 1,662,475  | 1,907,338  | 234,016    | 119,528   | 146,175 | 141,964   | 32.2    | 15.2 | 19.7 | 16.6 | 1.1  | 0.8  | 1.0 | 0.9  | 1.2  | 0.3  | -1.1 | 0.6  | 1.1 | 0.5 | 1.1  | 0.1 | 0.1  | 0.3  |  |  |
| P00045624  | C1orf31   | isoform 3 of Uncharacterized protein C1orf31                                    | 91.7%  | 8.3  | 1      | 1 | 1       | 1,624,273 | 1,760,980  | 1,662,475  | 1,907,338  | 234,016    | 119,528   | 146,175 | 141,964   | 32.2    | 15.2 | 19.7 | 16.6 | 1.1  | 0.8  | 1.0 | 0.9  | 1.2  | 0.3  | -1.1 | 0.6  | 1.1 | 0.5 | 1.1  | 0.1 | 0.1  | 0.3  |  |  |
| P00045593  | -         | Envelope protein (Fragment)                                                     | 99.7%  | 18.3 | 2      | 1 | 1       | 1         | 4,206,670  | 4,374,960  | 4,491,940  | 4,904,720  | 385,170   | 234,556 | 254,328   | 238,711 | 20.3 | 12.0 | 12.7 | 10.9 | 1.0  | 0.7 | 1.1  | 0.6  | 1.2  | 0.2  | 1.0  | 0.7 | 1.1 | 0.2  | 1.1 | 0.3  |      |  |  |
|            |           | KVPLSFYVIGAVLDGGAAGGKISTQYFYK                                                   |        | 3    | 95.9%  | 1 |         |           |            |            |            |            |           |         |           |         |      |      |      |      |      |     |      |      |      |      |      |     |     |      |     |      |      |  |  |
|            |           | VPLSFLYVIGAVLDGGAAGGK                                                           |        | 2    | 92.6%  | 1 |         |           |            |            |            |            |           |         |           |         |      |      |      |      |      |     |      |      |      |      |      |     |     |      |     |      |      |  |  |
| P00044623  | CDC58     | Coiled-coil domain-containing protein 58                                        | 99.6%  | 19.4 | 2      | 2 | 2       | 3         | 3,060,738  | 3,268,590  | 3,018,904  | 3,665,549  | 240,834   | 86,016  | 196,262   | 238,099 | 17.8 | 5.9  | 14.7 | 14.5 | 1.1  | 0.5 | -1.0 | 0.9  | 1.2  | 0.1  | -1.1 | 0.3 | 1.1 | 0.2  | 1.2 | 0.7  | 0.07 |  |  |
| P00045119  | CDC58     | Uncharacterized protein                                                         | 99.6%  | 21.5 | 2      | 2 | 2       | 3         | 3,060,738  | 3,268,590  | 3,018,904  | 3,665,549  | 240,834   | 86,016  | 196,262   | 238,099 | 17.8 | 5.9  | 14.7 | 14.5 | 1.1  | 0.5 | -1.0 | 0.9  | 1.2  | 0.1  | -1.1 | 0.3 | 1.1 | 0.2  | 1.2 | 0.7  | 0.07 |  |  |
| P00045888  | CDC58     | Protein                                                                         | 99.6%  | 19.9 | 2      | 2 | 2       | 3         | 3,060,738  | 3,268,590  | 3,018,904  | 3,665,549  | 240,834   | 86,016  | 196,262   | 238,099 | 17.8 | 5.9  | 14.7 | 14.5 | 1.1  | 0.5 | -1.0 | 0.9  | 1.2  | 0.1  | -1.1 | 0.3 | 1.1 | 0.2  | 1.2 | 0.7  | 0.07 |  |  |
|            |           | GLYSEMMASAR                                                                     |        | 3    | 92.3%  | 1 |         |           |            |            |            |            |           |         |           |         |      |      |      |      |      |     |      |      |      |      |      |     |     |      |     |      |      |  |  |
|            |           | VMQSELNVVEEVNDR                                                                 |        | 2    | 99.9%  | 1 |         |           |            |            |            |            |           |         |           |         |      |      |      |      |      |     |      |      |      |      |      |     |     |      |     |      |      |  |  |
| P00044955  | MAGEB17   | Melanoma-associated antigen B17                                                 | 80.8%  | 5.9  | 1      | 1 | 3       | 444,364   | 372,637    | 509,904    | 443,724    | 20,101     | 25,689    | 36,711  | 35,262    | 10.1    | 15.4 | 16.1 | 17.8 | -1.2 | 0.6  | 1.1 | 0.2  | -1.0 | 1    | 1.4  | 0.02 | 1.2 | 0.1 | -1.1 | 0.2 |      |      |  |  |
| P00087931  | MAGEB17   | melanoma-associated antigen B17                                                 | 90.8%  | 6.9  | 1      | 1 | 3       | 444,364   | 372,637    | 509,904    | 443,724    | 20,101     | 25,689    | 36,711  | 35,262    | 10.1    | 15.4 | 16.1 | 17.8 | -1.2 | 0.6  | 1.1 | 0.2  | -1.0 | 1    | 1.4  | 0.02 | 1.2 | 0.1 | -1.1 | 0.2 |      |      |  |  |
| P00082824  | MAGEB17   | melanoma-associated antigen B17 isoform 2, partial                              | 90.8%  | 6.0  | 1      | 1 | 3       | 444,364   | 372,637    | 509,904    | 443,724    | 20,101     | 25,689    | 36,711  | 35,262    | 10.1    | 15.4 | 16.1 | 17.8 | -1.2 | 0.6  | 1.1 | 0.2  | -1.0 | 1    | 1.4  | 0.02 | 1.2 | 0.1 | -1.1 | 0.2 |      |      |  |  |
|            |           | LPSSSPAGCGSPGSPFNAGIQEQR                                                        |        | 3    | 90.9%  | 1 |         |           |            |            |            |            |           |         |           |         |      |      |      |      |      |     |      |      |      |      |      |     |     |      |     |      |      |  |  |
| P00002983  | -         | 23 kDa protein                                                                  | 90.2%  | 35.3 | 1      | 5 | 353,174 | 417,958   | 394,060    | 478,124    | 72,504     | 50,504     | 28,140    | 54,340  | 45.9      | 27.0    | 16.0 | 25.4 | 1.2  | 0.5  | 1.1  | 0.6 | 1.4  | 0.2  | -1.1 | 0.7  | 1.1  | 0.4 | 1.2 | 0.2  | 0.2 |      |      |  |  |
| P00175388  | -         | 17 kDa protein                                                                  | 90.2%  | 9.7  | 1      | 1 | 5       | 353,174   | 417,958    | 394,060    | 478,124    | 72,504     | 50,504    | 28,140  | 54,340    | 45.9    | 27.0 | 16.0 | 25.4 | 1.2  | 0.5  | 1.1 | 0.6  | 1.4  | 0.2  | -1.1 | 0.7  | 1.1 | 0.4 | 1.2  | 0.2 | 0.2  |      |  |  |
| P00079338  | -         | 26 kDa protein                                                                  | 90.2%  | 6.5  | 1      | 1 | 5       | 353,174   | 417,958    | 394,060    | 478,124    | 72,504     | 50,504    | 28,140  | 54,340    | 45.9    | 27.0 | 16.0 | 25.4 | 1.2  | 0.5  | 1.1 | 0.6  | 1.4  | 0.2  | -1.1 | 0.7  | 1.1 | 0.4 | 1.2  | 0.2 | 0.2  |      |  |  |
| P00075966  | -         | 17 kDa protein                                                                  | 90.1%  | 6.1  | 1      | 1 | 5       | 353,174   | 417,958    | 394,060    | 478,124    | 72,504     | 50,504    | 28,140  | 54,340    | 45.9    | 27.0 | 16.0 | 25.4 | 1.2  | 0.5  | 1.1 | 0.6  | 1.4  | 0.2  | -1.1 | 0.7  | 1.1 | 0.4 | 1.2  | 0.2 | 0.2  |      |  |  |
| P000419118 | RPL29     | Ribosomal protein L29                                                           | 90.2%  | 9.3  | 1      | 1 | 5       | 353,174   | 417,958    | 394,060    | 478,124    | 72,504     | 50,504    | 28,140  | 54,340    | 45.9    | 27.0 | 16.0 | 25.4 | 1.2  | 0.5  | 1.1 | 0.6  | 1.4  | 0.2  | -1.1 | 0.7  | 1.1 | 0.4 | 1.2  | 0.2 | 0.2  |      |  |  |
| P00054042  | GTF2I     | isoform 1 of General transcription factor II-I                                  | 100.0% | 6    | 1      | 1 | 10      | 6         | 8,173,103  | 8,624,458  | 8,693,043  | 9,671,395  | 471,673   | 456,875 | 530,252   | 250,822 | 12.9 | 11.6 | 13.6 | 5.8  | 1.1  | 0.4 | 1.1  | 0.5  | 1.2  | 0.02 | -1.0 | 0.9 | 1.1 | 0.1  | 1.1 | 0.1  | 0.1  |  |  |
| P000217448 | GTF2I     | isoform 2 of General transcription factor II-I                                  | 100.0% | 12.7 | 9      | 9 | 10      | 6         | 8,173,103  | 8,624,458  | 8,693,043  | 9,671,395  | 471,673   | 456,875 | 530,252   | 250,822 | 12.9 | 11.6 | 13.6 | 5.8  | 1.1  | 0.4 | 1.1  | 0.5  | 1.2  | 0.02 | -1.0 | 0.9 | 1.1 | 0.1  | 1.1 | 0.1  | 0.1  |  |  |
| P000217450 | GTF2I     | isoform 3 of General transcription factor II-I                                  | 100.0% | 12.7 | 9      | 9 | 10      | 6         | 8,173,103  | 8,624,458  | 8,693,043  | 9,671,395  | 471,673   | 456,875 | 530,252   | 250,822 | 12.9 | 11.6 | 13.6 | 5.8  | 1.1  | 0.4 | 1.1  | 0.5  | 1.2  | 0.02 | -1.0 | 0.9 | 1.1 | 0.1  | 1.1 | 0.1  | 0.1  |  |  |
| P000202542 | GTF2I     | isoform 2 of General transcription factor II-I                                  | 100.0% | 12.7 | 9      | 9 | 10      | 6         | 8,173,103  | 8,624,458  | 8,693,043  | 9,671,395  | 471,673   | 456,875 | 530,252   | 250,822 | 12.9 | 11.6 | 13.6 | 5.8  | 1.1  | 0.4 | 1.1  | 0.5  | 1.2  | 0.02 | -1.0 | 0.9 | 1.1 | 0.1  | 1.1 | 0.1  | 0.1  |  |  |
| P000943947 | GTF2I     | isoform 5 of General transcription factor II-I                                  | 100.0% | 12.7 | 9      | 9 | 10      | 6         | 8,173,103  | 8,624,458  | 8,693,043  | 9,671,395  | 471,673   | 456,875 | 530,252   | 250,822 |      |      |      |      |      |     |      |      |      |      |      |     |     |      |     |      |      |  |  |

|            |         |                                                                           |        |        |   |    |    |   |            |            |            |            |           |         |         |         |         |      |      |      |      |      |      |      |     |      |      |      |     |      |      |     |      |     |      |     |  |  |
|------------|---------|---------------------------------------------------------------------------|--------|--------|---|----|----|---|------------|------------|------------|------------|-----------|---------|---------|---------|---------|------|------|------|------|------|------|------|-----|------|------|------|-----|------|------|-----|------|-----|------|-----|--|--|
| P00788043  | SCY1    | isoform 3 of N-terminal kinase-like protein                               | 97.0%  | 1.7    | 1 | 1  | 1  | 1 | 9          | 350,454    | 306,386    | 278,834    | 332,869   | 51,154  | 26,388  | 40,383  | 41,014  | 32.6 | 18.1 | 32.4 | 27.6 | -1.1 | 0.7  | -1.3 | 0.3 | -1.1 | 0.8  | -1.2 | 0.4 | 1.0  | 0.9  | 1.2 | 0.4  |     |      |     |  |  |
| P00788049  | SCY1    | isoform 5 of N-terminal kinase-like protein                               | 97.0%  | 1.9    | 1 | 1  | 1  | 1 | 9          | 350,454    | 306,386    | 278,834    | 332,869   | 51,154  | 26,388  | 40,383  | 41,014  | 32.6 | 18.1 | 32.4 | 27.6 | -1.1 | 0.7  | -1.3 | 0.3 | -1.1 | 0.8  | -1.2 | 0.4 | 1.0  | 0.9  | 1.2 | 0.4  |     |      |     |  |  |
| P00797883  | SCY1    | Uncharacterized protein                                                   | 97.0%  | 1.8    | 1 | 1  | 1  | 1 | 9          | 350,454    | 306,386    | 278,834    | 332,869   | 51,154  | 26,388  | 40,383  | 41,014  | 32.6 | 18.1 | 32.4 | 27.6 | -1.1 | 0.7  | -1.3 | 0.3 | -1.1 | 0.8  | -1.2 | 0.4 | 1.0  | 0.9  | 1.2 | 0.4  |     |      |     |  |  |
| P00797896  | SCY1    | Protein                                                                   | 97.0%  | 6.9    | 1 | 1  | 1  | 1 | 9          | 350,454    | 306,386    | 278,834    | 332,869   | 51,154  | 26,388  | 40,383  | 41,014  | 32.6 | 18.1 | 32.4 | 27.6 | -1.1 | 0.7  | -1.3 | 0.3 | -1.1 | 0.8  | -1.2 | 0.4 | 1.0  | 0.9  | 1.2 | 0.4  |     |      |     |  |  |
| P00797955  | SCY1    | Uncharacterized protein                                                   | 97.0%  | 1.6    | 1 | 1  | 1  | 1 | 9          | 350,454    | 306,386    | 278,834    | 332,869   | 51,154  | 26,388  | 40,383  | 41,014  | 32.6 | 18.1 | 32.4 | 27.6 | -1.1 | 0.7  | -1.3 | 0.3 | -1.1 | 0.8  | -1.2 | 0.4 | 1.0  | 0.9  | 1.2 | 0.4  |     |      |     |  |  |
| P00062266  | SCRN2   | Secernm-2                                                                 | 100.0% | 14.9   | 2 | 2  | 2  | 2 | 4,673,413  | 4,789,369  | 4,723,413  | 5,592,016  | 443,586   | 141,399 | 402,886 | 322,708 | 21.2    | 6.6  | 19.1 | 12.9 | 1.0  | 0.8  | 1.0  | 0.9  | 1.2 | 0.1  | -1.0 | 0.9  | 1.2 | 0.05 | 1.2  | 0.1 |      |     |      |     |  |  |
| P00062502  | SCRN2   | Secernm-2 isoform 2                                                       | 100.0% | 16.7   | 4 | 4  | 4  | 4 | 4,673,413  | 4,789,369  | 4,723,413  | 5,592,016  | 443,586   | 141,399 | 402,886 | 322,708 | 21.2    | 6.6  | 19.1 | 12.9 | 1.0  | 0.8  | 1.0  | 0.9  | 1.2 | 0.1  | -1.0 | 0.9  | 1.2 | 0.05 | 1.2  | 0.1 |      |     |      |     |  |  |
|            |         | EPYGGEGGLGMDLRL                                                           | 2      | 99.0%  | 1 | 1  | 1  | 1 |            |            |            |            |           |         |         |         |         |      |      |      |      |      |      |      |     |      |      |      |     |      |      |     |      |     |      |     |  |  |
|            |         | LCTIYVEVYSK                                                               | 3      | 100.0% | 1 | 1  | 1  | 1 |            |            |            |            |           |         |         |         |         |      |      |      |      |      |      |      |     |      |      |      |     |      |      |     |      |     |      |     |  |  |
|            |         | NSNLSGSDTSDAGHPFLR                                                        | 2      | 100.0% | 1 | 1  | 1  | 1 |            |            |            |            |           |         |         |         |         |      |      |      |      |      |      |      |     |      |      |      |     |      |      |     |      |     |      |     |  |  |
|            |         | GGSTFARINNGIRL                                                            | 2      | 100.0% | 1 | 1  | 1  | 1 |            |            |            |            |           |         |         |         |         |      |      |      |      |      |      |      |     |      |      |      |     |      |      |     |      |     |      |     |  |  |
| P00062884  | CTTN    | src substrate cortactin isoform b                                         | 100.0% | 24.2   | 9 | 10 | 13 | 1 | 14,230,280 | 14,130,235 | 14,071,366 | 16,140,330 | 954,041   | 683,577 | 915,003 | 656,537 | 14.2    | 10.8 | 14.5 | 9.1  | -1.0 | 1.1  | -1.0 | 0.9  | 1.1 | 0.1  | -1.0 | 0.9  | 1.1 | 0.07 | 1.1  | 0.1 | 0.1  |     |      |     |  |  |
|            |         | ASAGHVAAGDGDAGDQWETDPDFVNSVSK                                             | 3      | 100.0% | 2 | 2  | 2  | 2 |            |            |            |            |           |         |         |         |         |      |      |      |      |      |      |      |     |      |      |      |     |      |      |     |      |     |      |     |  |  |
|            |         | DYSSGFSQK                                                                 | 1      | 100.0% | 1 | 1  | 1  | 1 |            |            |            |            |           |         |         |         |         |      |      |      |      |      |      |      |     |      |      |      |     |      |      |     |      |     |      |     |  |  |
|            |         | GPVSTPEPEFYSMSEADYR                                                       | 2      | 100.0% | 2 | 2  | 2  | 2 |            |            |            |            |           |         |         |         |         |      |      |      |      |      |      |      |     |      |      |      |     |      |      |     |      |     |      |     |  |  |
|            |         | GPSVSTPEPEFYSMSEADYR                                                      | 3      | 100.0% | 1 | 1  | 1  | 1 |            |            |            |            |           |         |         |         |         |      |      |      |      |      |      |      |     |      |      |      |     |      |      |     |      |     |      |     |  |  |
|            |         | IRENFYRHEVDTLA                                                            | 3      | 100.0% | 1 | 1  | 1  | 1 |            |            |            |            |           |         |         |         |         |      |      |      |      |      |      |      |     |      |      |      |     |      |      |     |      |     |      |     |  |  |
|            |         | NASTFEDVTVQSVAYK                                                          | 2      | 100.0% | 1 | 1  | 1  | 1 |            |            |            |            |           |         |         |         |         |      |      |      |      |      |      |      |     |      |      |      |     |      |      |     |      |     |      |     |  |  |
|            |         | SAVGFQYQK                                                                 | 2      | 100.0% | 2 | 2  | 2  | 2 |            |            |            |            |           |         |         |         |         |      |      |      |      |      |      |      |     |      |      |      |     |      |      |     |      |     |      |     |  |  |
|            |         | SAVGFQYQK                                                                 | 2      | 100.0% | 2 | 2  | 2  | 2 |            |            |            |            |           |         |         |         |         |      |      |      |      |      |      |      |     |      |      |      |     |      |      |     |      |     |      |     |  |  |
|            |         | VDGSAVGFQYQK                                                              | 2      | 99.0%  | 1 | 1  | 1  | 1 |            |            |            |            |           |         |         |         |         |      |      |      |      |      |      |      |     |      |      |      |     |      |      |     |      |     |      |     |  |  |
|            |         | YVQAGDQVYK                                                                | 2      | 99.3%  | 1 | 1  | 1  | 1 |            |            |            |            |           |         |         |         |         |      |      |      |      |      |      |      |     |      |      |      |     |      |      |     |      |     |      |     |  |  |
| P00063234  | PRKAR2A | Protein kinase, cAMP-dependent, regulatory, type II, alpha, isoform CRA_b | 100.0% | 13.4   | 4 | 4  | 4  | 4 | 2          | 5,736,384  | 6,291,711  | 6,114,913  | 7,363,387 | 556,506 | 315,014 | 496,462 | 205,663 | 19.8 | 11.2 | 18.2 | 8.3  | 1.1  | 0.4  | 1.1  | 0.6 | 1.3  | 0.02 | -1.0 | 0.8 | 1.2  | 0.02 | 1.2 | 0.05 | 1.2 | 0.05 |     |  |  |
| P00219774  | PRKAR2A | cAMP-dependent protein kinase type II-alpha regulatory subunit            | 100.0% | 12.6   | 4 | 4  | 4  | 4 | 2          | 5,736,384  | 6,291,711  | 6,114,913  | 7,363,387 | 556,506 | 315,014 | 496,462 | 205,663 | 19.8 | 11.2 | 18.2 | 8.3  | 1.1  | 0.4  | 1.1  | 0.6 | 1.3  | 0.02 | -1.0 | 0.8 | 1.2  | 0.02 | 1.2 | 0.05 | 1.2 | 0.05 |     |  |  |
|            |         | APASVLAATPR                                                               | 2      | 99.9%  | 1 | 1  | 1  | 1 |            |            |            |            |           |         |         |         |         |      |      |      |      |      |      |      |     |      |      |      |     |      |      |     |      |     |      |     |  |  |
|            |         | GTYYLYTK                                                                  | 1      | 100.0% | 1 | 1  | 1  | 1 |            |            |            |            |           |         |         |         |         |      |      |      |      |      |      |      |     |      |      |      |     |      |      |     |      |     |      |     |  |  |
|            |         | MPEFSYFLLL                                                                | 2      | 98.6%  | 1 | 1  | 1  | 1 |            |            |            |            |           |         |         |         |         |      |      |      |      |      |      |      |     |      |      |      |     |      |      |     |      |     |      |     |  |  |
|            |         | NLDQEGSDVLAAMFER                                                          | 2      | 100.0% | 2 | 2  | 2  | 2 |            |            |            |            |           |         |         |         |         |      |      |      |      |      |      |      |     |      |      |      |     |      |      |     |      |     |      |     |  |  |
| P00063242  | PGAM5   | isoform 2 of Serine/threonine-protein phosphatase PGAM5, mitochondrial    | 95.8%  | 3.3    | 1 | 1  | 1  | 3 | 3,912,673  | 3,886,293  | 3,849,250  | 4,265,433  | 96,498    | 241,348 | 191,780 | 183,695 | 5.5     | 13.9 | 11.1 | 9.6  | -1.0 | 0.9  | -1.0 | 0.8  | 1.1 | 0.1  | -1.0 | 0.9  | 1.1 | 0.2  | 1.1  | 0.2 | 1.1  | 0.2 | 1.1  | 0.2 |  |  |
| P00074890  | PGAM5   | isoform 1 of Serine/threonine-protein phosphatase PGAM5, mitochondrial    | 95.8%  | 3.5    | 1 | 1  | 1  | 3 | 3,912,673  | 3,886,293  | 3,849,250  | 4,265,433  | 96,498    | 241,348 | 191,780 | 183,695 | 5.5     | 13.9 | 11.1 | 9.6  | -1.0 | 0.9  | -1.0 | 0.8  | 1.1 | 0.1  | -1.0 | 0.9  | 1.1 | 0.2  | 1.1  | 0.2 | 1.1  | 0.2 | 1.1  | 0.2 |  |  |
| P00094534  | PGAM5   | serine/threonine-protein phosphatase PGAM5, mitochondrial isoform 3       | 95.8%  | 3.6    | 1 | 1  | 1  | 3 | 3,912,673  | 3,886,293  | 3,849,250  | 4,265,433  | 96,498    | 241,348 | 191,780 | 183,695 | 5.5     | 13.9 | 11.1 | 9.6  | -1.0 | 0.9  | -1.0 | 0.8  | 1.1 | 0.1  | -1.0 | 0.9  | 1.1 | 0.2  | 1.1  | 0.2 | 1.1  | 0.2 | 1.1  | 0.2 |  |  |
|            |         | AEITDSSR                                                                  | 2      | 95.8%  | 2 | 2  | 2  | 2 |            |            |            |            |           |         |         |         |         |      |      |      |      |      |      |      |     |      |      |      |     |      |      |     |      |     |      |     |  |  |
| P00063244  | FUBP3   | Uncharacterized protein                                                   | 100.0% | 15.0   | 3 | 3  | 3  | 2 | 10,586,550 | 10,824,950 | 10,467,175 | 12,107,620 | 837,506   | 352,209 | 603,993 | 416,790 | 17.7    | 7.3  | 12.9 | 7.7  | 1.0  | 0.8  | -1.0 | 0.9  | 1.1 | 0.1  | -1.0 | 0.6  | 1.1 | 0.05 | 1.2  | 0.1 | 0.05 | 1.2 | 0.06 |     |  |  |
| P00037285  | FUBP3   | isoform 1 of Far upstream element-binding protein 3                       | 100.0% | 8.4    | 3 | 3  | 3  | 2 | 10,586,550 | 10,824,950 | 10,467,175 | 12,107,620 | 837,506   | 352,209 | 603,993 | 416,790 | 17.7    | 7.3  | 12.9 | 7.7  | 1.0  | 0.8  | -1.0 | 0.9  | 1.1 | 0.1  | -1.0 | 0.6  | 1.1 | 0.05 | 1.2  | 0.1 | 0.05 | 1.2 | 0.06 |     |  |  |
|            |         | MGSGDGLPVPVPR                                                             | 2      | 98.0%  | 2 | 2  | 2  | 2 |            |            |            |            |           |         |         |         |         |      |      |      |      |      |      |      |     |      |      |      |     |      |      |     |      |     |      |     |  |  |
|            |         | MVMGQGLPTGADKPLR                                                          | 3      | 100.0% | 1 | 1  | 1  | 1 |            |            |            |            |           |         |         |         |         |      |      |      |      |      |      |      |     |      |      |      |     |      |      |     |      |     |      |     |  |  |
|            |         | RPLDGDVYVQGLGALVQR                                                        | 3      | 82.0%  | 1 | 1  | 1  | 1 |            |            |            |            |           |         |         |         |         |      |      |      |      |      |      |      |     |      |      |      |     |      |      |     |      |     |      |     |  |  |
| P00063827  | ABHD14B | isoform 1 of Abhydrolase domain-containing protein 14B                    | 100.0% | 11.1   | 4 | 4  | 4  | 2 | 6,301,444  | 6,708,631  | 6,383,408  | 7,260,119  | 657,136   | 306,255 | 569,561 | 246,112 | 23.3    | 10.2 | 20.0 | 7.6  | 1.1  | 0.1  | 0.0  | 1.0  | 1.2 | 0.2  | -1.1 | 0.6  | 1.1 | 0.2  | 1.1  | 0.2 | 1.1  | 0.2 | 1.1  | 0.2 |  |  |
| P000910706 | ABHD14B | isoform 2 of Abhydrolase domain-containing protein 14B                    | 100.0% | 31.8   | 4 | 4  | 4  | 2 | 6,301,444  | 6,708,631  | 6,383,408  | 7,260,119  | 657,136   | 306,255 | 569,561 | 246,112 | 23.3    | 10.2 | 20.0 | 7.6  | 1.1  | 0.1  | 0.0  | 1.0  | 1.2 | 0.2  | -1.1 | 0.6  | 1.1 | 0.2  | 1.1  | 0.2 | 1.1  | 0.2 | 1.1  | 0.2 |  |  |
|            |         | AVADLQDGLGSK                                                              | 2      | 99.2%  | 1 | 1  | 1  | 1 |            |            |            |            |           |         |         |         |         |      |      |      |      |      |      |      |     |      |      |      |     |      |      |     |      |     |      |     |  |  |
|            |         | ESTVQDGLDFR                                                               | 2      | 98.0%  | 2 | 2  | 2  | 2 |            |            |            |            |           |         |         |         |         |      |      |      |      |      |      |      |     |      |      |      |     |      |      |     |      |     |      |     |  |  |
|            |         | FSVLLGIR                                                                  | 2      | 99.1%  | 1 | 1  | 1  | 1 |            |            |            |            |           |         |         |         |         |      |      |      |      |      |      |      |     |      |      |      |     |      |      |     |      |     |      |     |  |  |
|            |         | FSVLLGIR                                                                  | 3      | 93.5%  | 1 | 1  | 1  | 1 |            |            |            |            |           |         |         |         |         |      |      |      |      |      |      |      |     |      |      |      |     |      |      |     |      |     |      |     |  |  |
|            |         | TPALVYQDQVQVGGI SEHKLK                                                    | 3      | 100.0% | 1 | 1  | 1  | 1 |            |            |            |            |           |         |         |         |         |      |      |      |      |      |      |      |     |      |      |      |     |      |      |     |      |     |      |     |  |  |
| P00064066  | EEFD1   | elongation factor 1-delta isoform 4                                       | 100.0% | 24.9   | 5 | 5  | 5  | 9 | 2</        |            |            |            |           |         |         |         |         |      |      |      |      |      |      |      |     |      |      |      |     |      |      |     |      |     |      |     |  |  |









|            |        |                                                                                                  |        |      |    |    |    |   |            |            |            |            |           |           |           |         |      |      |      |      |      |     |      |     |      |      |      |     |      |      |      |      |  |  |
|------------|--------|--------------------------------------------------------------------------------------------------|--------|------|----|----|----|---|------------|------------|------------|------------|-----------|-----------|-----------|---------|------|------|------|------|------|-----|------|-----|------|------|------|-----|------|------|------|------|--|--|
| P00219468  | PFN2   | isoform lb of Profilin-2                                                                         | 100.0% | 47.1 | 4  | 4  | 5  | 4 | 2,810,537  | 2,743,311  | 2,823,694  | 3,088,129  | 169,179   | 110,913   | 158,860   | 62,331  | 13.5 | 9.0  | 12.6 | 4.5  | -1.0 | 0.7 | 1.0  | 1.1 | 0.2  | 1.0  | 0.7  | 1.1 | 0.03 | 1.1  | 0.2  |      |  |  |
| P00219469  | PFN2   | isoform lb of Profilin-2                                                                         | 100.0% | 47.1 | 4  | 4  | 5  | 4 | 2,810,537  | 2,743,311  | 2,823,694  | 3,088,129  | 169,179   | 110,913   | 158,860   | 62,331  | 13.5 | 9.0  | 12.6 | 4.5  | -1.0 | 0.7 | 1.0  | 1.1 | 0.2  | 1.0  | 0.7  | 1.1 | 0.03 | 1.1  | 0.2  |      |  |  |
| P00219470  | PFN2   | Profilin                                                                                         | 100.0% | 47.1 | 4  | 4  | 5  | 4 | 2,810,537  | 2,743,311  | 2,823,694  | 3,088,129  | 169,179   | 110,913   | 158,860   | 62,331  | 13.5 | 9.0  | 12.6 | 4.5  | -1.0 | 0.7 | 1.0  | 1.1 | 0.2  | 1.0  | 0.7  | 1.1 | 0.03 | 1.1  | 0.2  |      |  |  |
|            |        | DSLYVGGDCTMDIR                                                                                   |        |      |    |    |    |   |            |            |            |            |           |           |           |         |      |      |      |      |      |     |      |     |      |      |      |     |      |      |      |      |  |  |
|            |        | EGFFINGLTLGAK                                                                                    |        |      |    |    |    |   |            |            |            |            |           |           |           |         |      |      |      |      |      |     |      |     |      |      |      |     |      |      |      |      |  |  |
|            |        | SGGQAFPTNVAQGR                                                                                   |        |      |    |    |    |   |            |            |            |            |           |           |           |         |      |      |      |      |      |     |      |     |      |      |      |     |      |      |      |      |  |  |
|            |        | YYWAAAGGVYQARPIERLBIKMGK                                                                         |        |      |    |    |    |   |            |            |            |            |           |           |           |         |      |      |      |      |      |     |      |     |      |      |      |     |      |      |      |      |  |  |
| P00107742  | LUC7L3 | isoform 1 of Luc7-like protein 3                                                                 | 97.0%  | 2.6  | 1  | 1  | 1  | 5 | 794,328    | 792,792    | 793,964    | 795,402    | 147,991   | 81,143    | 60,695    | 44,910  | 41.7 | 22.9 | 17.1 | 12.8 | -1.0 | 1   | -1.0 | 1   | -1.0 | 1    | 1.0  | 1   | -1.0 | 0.9  | -1.0 | 0.9  |  |  |
| P00064698  | LUC7L3 | Uncharacterized protein                                                                          | 97.0%  | 6.0  | 1  | 1  | 1  | 5 | 794,328    | 792,792    | 793,964    | 795,402    | 147,991   | 81,143    | 60,695    | 44,910  | 41.7 | 22.9 | 17.1 | 12.8 | -1.0 | 1   | -1.0 | 1   | -1.0 | 1    | 1.0  | 1   | -1.0 | 0.9  | -1.0 | 0.9  |  |  |
| P00064699  | LUC7L3 | cDNA FLJ18548, highly similar to Cluipatin resistance-associated overexpressed gene              | 97.0%  | 2.0  | 1  | 1  | 1  | 5 | 794,328    | 792,792    | 793,964    | 795,402    | 147,991   | 81,143    | 60,695    | 44,910  | 41.7 | 22.9 | 17.1 | 12.8 | -1.0 | 1   | -1.0 | 1   | -1.0 | 1    | 1.0  | 1   | -1.0 | 0.9  | -1.0 | 0.9  |  |  |
| P00066812  | LUC7L3 | CRCP protein (Fragment)                                                                          | 97.0%  | 4.1  | 1  | 1  | 1  | 5 | 794,328    | 792,792    | 793,964    | 795,402    | 147,991   | 81,143    | 60,695    | 44,910  | 41.7 | 22.9 | 17.1 | 12.8 | -1.0 | 1   | -1.0 | 1   | -1.0 | 1    | 1.0  | 1   | -1.0 | 0.9  | -1.0 | 0.9  |  |  |
| P00090726  | LUC7L3 | cDNA FLJ77715, highly similar to Homo sapiens cluipatin resistance-associated overexpressed gene | 97.0%  | 2.1  | 1  | 1  | 1  | 5 | 794,328    | 792,792    | 793,964    | 795,402    | 147,991   | 81,143    | 60,695    | 44,910  | 41.7 | 22.9 | 17.1 | 12.8 | -1.0 | 1   | -1.0 | 1   | -1.0 | 1    | 1.0  | 1   | -1.0 | 0.9  | -1.0 | 0.9  |  |  |
|            |        | YLSGLVAEER                                                                                       |        |      |    |    |    |   |            |            |            |            |           |           |           |         |      |      |      |      |      |     |      |     |      |      |      |     |      |      |      |      |  |  |
| P00107831  | PIPRF  | isoform 1 of Receptor-type tyrosine protein phosphatase F                                        | 99.9%  | 1.8  | 2  | 2  | 2  | 2 | 3,064,498  | 2,570,801  | 3,474,342  | 2,133,313  | 227,302   | 217,634   | 216,542   | 15.6    | 18.8 | 14.0 | 15.3 | -1.2 | 0.2  | 1.1 | 0.2  | 1.0 | 0.7  | 1.4  | 0.02 | 1.2 | 0.09 | 1.1  | 0.3  |      |  |  |
| P00104516  | PIPRF  | isoform 2 of Receptor-type tyrosine protein phosphatase F                                        | 99.9%  | 1.8  | 2  | 2  | 2  | 2 | 3,064,498  | 2,570,801  | 3,474,342  | 2,133,313  | 227,302   | 217,634   | 216,542   | 15.6    | 18.8 | 14.0 | 15.3 | -1.2 | 0.2  | 1.1 | 0.2  | 1.0 | 0.7  | 1.4  | 0.02 | 1.2 | 0.09 | 1.1  | 0.3  |      |  |  |
|            |        | FEVFDVGGDGR                                                                                      |        |      |    |    |    |   |            |            |            |            |           |           |           |         |      |      |      |      |      |     |      |     |      |      |      |     |      |      |      |      |  |  |
|            |        | VLFAVTFVGGDGRSPRTQVQK                                                                            |        |      |    |    |    |   |            |            |            |            |           |           |           |         |      |      |      |      |      |     |      |     |      |      |      |     |      |      |      |      |  |  |
| P00101785  | HEPH   | Hephaestin intron3                                                                               | 99.4%  | 1    | 1  | 1  | 1  | 0 | 180,886    | 208,574    | 200,328    | 190,041    | 23,882    | 10,352    | 19,997    | 16,748  | 29.5 | 11.1 | 22.3 | 19.7 | 1.2  | 0.3 | 1.1  | 0.5 | 1.1  | 0.8  | -1.0 | 0.7 | -1.1 | 0.4  | -1.1 | 0.7  |  |  |
| P000432023 | HEPH   | hephaestin isoform b                                                                             | 99.4%  | 1.4  | 1  | 1  | 1  | 0 | 180,886    | 208,574    | 200,328    | 190,041    | 23,882    | 10,352    | 19,997    | 16,748  | 29.5 | 11.1 | 22.3 | 19.7 | 1.2  | 0.3 | 1.1  | 0.5 | 1.1  | 0.8  | -1.0 | 0.7 | -1.1 | 0.4  | -1.1 | 0.7  |  |  |
| P000841637 | HEPH   | Hephaestin                                                                                       | 99.4%  | 1.5  | 1  | 1  | 1  | 0 | 180,886    | 208,574    | 200,328    | 190,041    | 23,882    | 10,352    | 19,997    | 16,748  | 29.5 | 11.1 | 22.3 | 19.7 | 1.2  | 0.3 | 1.1  | 0.5 | 1.1  | 0.8  | -1.0 | 0.7 | -1.1 | 0.4  | -1.1 | 0.7  |  |  |
| P00064981  | HEPH   | cDNA FLJ25548, highly similar to Cluipatin resistance-associated overexpressed gene              | 99.4%  | 1.0  | 1  | 1  | 1  | 0 | 180,886    | 208,574    | 200,328    | 190,041    | 23,882    | 10,352    | 19,997    | 16,748  | 29.5 | 11.1 | 22.3 | 19.7 | 1.2  | 0.3 | 1.1  | 0.5 | 1.1  | 0.8  | -1.0 | 0.7 | -1.1 | 0.4  | -1.1 | 0.7  |  |  |
| P000925214 | HEPH   | Uncharacterized protein                                                                          | 99.4%  | 1.2  | 1  | 1  | 1  | 0 | 180,886    | 208,574    | 200,328    | 190,041    | 23,882    | 10,352    | 19,997    | 16,748  | 29.5 | 11.1 | 22.3 | 19.7 | 1.2  | 0.3 | 1.1  | 0.5 | 1.1  | 0.8  | -1.0 | 0.7 | -1.1 | 0.4  | -1.1 | 0.7  |  |  |
| P00098273  | HEPH   | hephaestin isoform a                                                                             | 99.4%  | 1.0  | 1  | 1  | 1  | 0 | 180,886    | 208,574    | 200,328    | 190,041    | 23,882    | 10,352    | 19,997    | 16,748  | 29.5 | 11.1 | 22.3 | 19.7 | 1.2  | 0.3 | 1.1  | 0.5 | 1.1  | 0.8  | -1.0 | 0.7 | -1.1 | 0.4  | -1.1 | 0.7  |  |  |
|            |        | GEVDFGVYVQK                                                                                      |        |      |    |    |    |   |            |            |            |            |           |           |           |         |      |      |      |      |      |     |      |     |      |      |      |     |      |      |      |      |  |  |
| P00104201  | COG8P  | cDNA FLJ35596, highly similar to Conserved oligomeric Golgi complex component                    | 98.4%  | 2.2  | 1  | 1  | 1  | 1 | 1,533,400  | 1,614,060  | 1,822,800  | 1,963,300  | 173,368   | 178,354   | 202,637   | 195,543 | 25.3 | 24.7 | 24.9 | 22.3 | 4.2  | 1.1 | 0.8  | 1.2 | 0.3  | 1.1  | 0.5  | 1.2 | 0.2  | 1.1  | 0.6  |      |  |  |
|            |        | VSGFLOVLETLQYR                                                                                   |        |      |    |    |    |   |            |            |            |            |           |           |           |         |      |      |      |      |      |     |      |     |      |      |      |     |      |      |      |      |  |  |
| P001040422 | SDN1   | Staphylococcal nuclease domain-containing protein 1                                              | 100.0% | 25.8 | 18 | 18 | 19 | 2 | 34,664,094 | 35,413,091 | 34,903,648 | 40,128,754 | 1,737,691 | 1,798,064 | 1,982,759 | 744,789 | 11.2 | 11.4 | 12.7 | 4.2  | 1.0  | 0.8 | 1.0  | 0.9 | 1.2  | 0.02 | -1.0 | 0.9 | 1.1  | 0.04 | 1.1  | 0.06 |  |  |
| P001009513 | SDN1   | cDNA FLJ39284.t1, clone OC8BF200902, highly similar to Staphylococcal nuclease                   | 100.0% | 27.1 | 19 | 19 | 19 | 2 | 34,664,094 | 35,413,091 | 34,903,648 | 40,128,754 | 1,737,691 | 1,798,064 | 1,982,759 | 744,789 | 11.2 | 11.4 | 12.7 | 4.2  | 1.0  | 0.8 | 1.0  | 0.9 | 1.2  | 0.02 | -1.0 | 0.9 | 1.1  | 0.04 | 1.1  | 0.06 |  |  |
|            |        | ADDADEFGYSR                                                                                      |        |      |    |    |    |   |            |            |            |            |           |           |           |         |      |      |      |      |      |     |      |     |      |      |      |     |      |      |      |      |  |  |
|            |        | DYVAFYFANQK                                                                                      |        |      |    |    |    |   |            |            |            |            |           |           |           |         |      |      |      |      |      |     |      |     |      |      |      |     |      |      |      |      |  |  |
|            |        | EADSSLETFPPAAEAK                                                                                 |        |      |    |    |    |   |            |            |            |            |           |           |           |         |      |      |      |      |      |     |      |     |      |      |      |     |      |      |      |      |  |  |
|            |        | ETCLTFLVLAGECPR                                                                                  |        |      |    |    |    |   |            |            |            |            |           |           |           |         |      |      |      |      |      |     |      |     |      |      |      |     |      |      |      |      |  |  |
|            |        | EYEVLEFESDKK                                                                                     |        |      |    |    |    |   |            |            |            |            |           |           |           |         |      |      |      |      |      |     |      |     |      |      |      |     |      |      |      |      |  |  |
|            |        | GDVGLGLVQK                                                                                       |        |      |    |    |    |   |            |            |            |            |           |           |           |         |      |      |      |      |      |     |      |     |      |      |      |     |      |      |      |      |  |  |
|            |        | LGLTSLPAPSTR                                                                                     |        |      |    |    |    |   |            |            |            |            |           |           |           |         |      |      |      |      |      |     |      |     |      |      |      |     |      |      |      |      |  |  |
|            |        | LSPRVDYRFEAR                                                                                     |        |      |    |    |    |   |            |            |            |            |           |           |           |         |      |      |      |      |      |     |      |     |      |      |      |     |      |      |      |      |  |  |
|            |        | MLVSGCAIVR                                                                                       |        |      |    |    |    |   |            |            |            |            |           |           |           |         |      |      |      |      |      |     |      |     |      |      |      |     |      |      |      |      |  |  |
|            |        | NDLMSHPVYGGVAPR                                                                                  |        |      |    |    |    |   |            |            |            |            |           |           |           |         |      |      |      |      |      |     |      |     |      |      |      |     |      |      |      |      |  |  |
|            |        | NLPGLVGGVGSSELTFLTK                                                                              |        |      |    |    |    |   |            |            |            |            |           |           |           |         |      |      |      |      |      |     |      |     |      |      |      |     |      |      |      |      |  |  |
|            |        | SEAVVYVFGSSR                                                                                     |        |      |    |    |    |   |            |            |            |            |           |           |           |         |      |      |      |      |      |     |      |     |      |      |      |     |      |      |      |      |  |  |
|            |        | SLLSAEAAK                                                                                        |        |      |    |    |    |   |            |            |            |            |           |           |           |         |      |      |      |      |      |     |      |     |      |      |      |     |      |      |      |      |  |  |
|            |        | SSPTDELLAAEAK                                                                                    |        |      |    |    |    |   |            |            |            |            |           |           |           |         |      |      |      |      |      |     |      |     |      |      |      |     |      |      |      |      |  |  |
|            |        | VADSGDQTK                                                                                        |        |      |    |    |    |   |            |            |            |            |           |           |           |         |      |      |      |      |      |     |      |     |      |      |      |     |      |      |      |      |  |  |
|            |        | VITVLYNAGEAAK                                                                                    |        |      |    |    |    |   |            |            |            |            |           |           |           |         |      |      |      |      |      |     |      |     |      |      |      |     |      |      |      |      |  |  |
|            |        | VWQVGLINDAQYR                                                                                    |        |      |    |    |    |   |            |            |            |            |           |           |           |         |      |      |      |      |      |     |      |     |      |      |      |     |      |      |      |      |  |  |
|            |        | VNVTVQYRSPATPEVTFAPSR                                                                            |        |      |    |    |    |   |            |            |            |            |           |           |           |         |      |      |      |      |      |     |      |     |      |      |      |     |      |      |      |      |  |  |
|            |        | FEVFDVGGDGR                                                                                      |        |      |    |    |    |   |            |            |            |            |           |           |           |         |      |      |      |      |      |     |      |     |      |      |      |     |      |      |      |      |  |  |
| P00141118  | EPC2   | Enhancer of polycomb homolog 2                                                                   | 98.1%  | 1.5  | 1  | 1  | 1  | 1 | 6,149,960  | 5,455,370  | 4,653,280  | 5,678,570  | 819,785   | 553,126   | 279,322   | 376,203 | 29.8 | 22.7 | 13.4 | 14.8 | -1.1 | 0.5 | -1.3 | 0.1 | -1.1 | 0.6  | -1.2 | 0.2 | 1.0  | 0.7  | 1.2  | 0.06 |  |  |
|            |        | VYFSSASSAR                                                                                       |        |      |    |    |    |   |            |            |            |            |           |           |           |         |      |      |      |      |      |     |      |     |      |      |      |     |      |      |      |      |  |  |
| P00141318  | CKAP4  | Cytoskeleton-associated protein 4                                                                | 100.0% | 6.3  | 3  | 3  | 3  |   |            |            |            |            |           |           |           |         |      |      |      |      |      |     |      |     |      |      |      |     |      |      |      |      |  |  |



|            |           |                                                                               |        |                        |   |       |   |   |           |           |           |           |         |         |         |         |      |      |      |      |      |      |      |     |      |      |      |     |      |      |       |      |
|------------|-----------|-------------------------------------------------------------------------------|--------|------------------------|---|-------|---|---|-----------|-----------|-----------|-----------|---------|---------|---------|---------|------|------|------|------|------|------|------|-----|------|------|------|-----|------|------|-------|------|
| P0094099   | AP2A2     | H1 protein                                                                    | 100.0% | 6.5                    | 1 | 1     | 1 | 6 | 1,029,838 | 990,052   | 966,398   | 1,150,787 | 81,478  | 31,321  | 83,720  | 48,919  | 17.7 | 7.0  | 19.4 | 9.5  | -1.0 | 0.7  | -1.1 | 0.6 | 1.1  | 0.2  | -1.0 | 0.8 | 1.2  | 0.03 | 1.2   | 0.09 |
| P00166612  | CMYA5     | Cardiomyopathy-associated protein 5                                           | 96.3%  | EMEAFAPEGRK            | 2 | 96.0% | 1 | 1 | 4,500,620 | 4,692,870 | 4,175,080 | 4,887,320 | 387,222 | 264,453 | 297,211 | 280,434 | 19.2 | 12.6 | 15.9 | 12.8 | 1.0  | 0.7  | -1.1 | 0.5 | 1.1  | 0.4  | -1.1 | 0.2 | 1.0  | 0.6  | 1.2   | 0.1  |
| P00166613  | GALNT1    | Galactosyltransferase-1                                                       | 91.6%  | SFMATPADVK             | 2 | 93.9% | 1 | 1 | 1,987,930 | 1,987,820 | 1,768,445 | 2,210,935 | 118,016 | 78,737  | 103,601 | 26.8    | 13.3 | 10.0 | 10.5 | 1.1  | 0.7  | -1.1 | 0.7  | 1.2 | 0.2  | -1.1 | 0.2  | 1.1 | 0.2  | 1.3  | 0.009 |      |
| P00402718  | GALNT1L   | Galactosyltransferase-1-like protein 1                                        | 91.6%  | QHNKQLESDK             | 2 | 91.6% | 1 | 1 | 1,876,390 | 1,987,820 | 1,768,445 | 2,210,935 | 118,016 | 78,737  | 103,601 | 26.8    | 13.3 | 10.0 | 10.5 | 1.1  | 0.7  | -1.1 | 0.7  | 1.2 | 0.2  | -1.1 | 0.2  | 1.1 | 0.2  | 1.3  | 0.009 |      |
| P00166996  | SYVN1     | Isom 1 of E3 ubiquitin-protein ligase synovium                                | 98.0%  | 3.7                    | 1 | 1     | 1 | 6 | 139,689   | 116,044   | 102,963   | 135,428   | 15,448  | 10,510  | 12,395  | 5,153   | 24.7 | 20.3 | 26.9 | 8.5  | -1.2 | 0.2  | -1.4 | 0.1 | -1.0 | 0.8  | -1.1 | 0.4 | 1.2  | 0.1  | 1.3   | 0.04 |
| P00172513  | SYVN1     | Isom 2 of E3 ubiquitin-protein ligase synovium                                | 98.0%  | 3.7                    | 1 | 1     | 1 | 6 | 139,689   | 116,044   | 102,963   | 135,428   | 15,448  | 10,510  | 12,395  | 5,153   | 24.7 | 20.3 | 26.9 | 8.5  | -1.2 | 0.2  | -1.4 | 0.1 | -1.0 | 0.8  | -1.1 | 0.4 | 1.2  | 0.1  | 1.3   | 0.04 |
| P00092654  | SYVN1     | Isom 3 of E3 ubiquitin-protein ligase synovium                                | 98.0%  | 3.7                    | 1 | 1     | 1 | 6 | 139,689   | 116,044   | 102,963   | 135,428   | 15,448  | 10,510  | 12,395  | 5,153   | 24.7 | 20.3 | 26.9 | 8.5  | -1.2 | 0.2  | -1.4 | 0.1 | -1.0 | 0.8  | -1.1 | 0.4 | 1.2  | 0.1  | 1.3   | 0.04 |
| P00092524  | SYVN1     | Uncharacterized protein                                                       | 98.0%  | 18.4                   | 1 | 1     | 1 | 6 | 139,689   | 116,044   | 102,963   | 135,428   | 15,448  | 10,510  | 12,395  | 5,153   | 24.7 | 20.3 | 26.9 | 8.5  | -1.2 | 0.2  | -1.4 | 0.1 | -1.0 | 0.8  | -1.1 | 0.4 | 1.2  | 0.1  | 1.3   | 0.04 |
| P00097125  | SYVN1     | Uncharacterized protein                                                       | 98.0%  | 18.4                   | 1 | 1     | 1 | 6 | 139,689   | 116,044   | 102,963   | 135,428   | 15,448  | 10,510  | 12,395  | 5,153   | 24.7 | 20.3 | 26.9 | 8.5  | -1.2 | 0.2  | -1.4 | 0.1 | -1.0 | 0.8  | -1.1 | 0.4 | 1.2  | 0.1  | 1.3   | 0.04 |
| P000953104 | SYVN1     | Uncharacterized protein                                                       | 98.0%  | 9.7                    | 1 | 1     | 1 | 6 | 139,689   | 116,044   | 102,963   | 135,428   | 15,448  | 10,510  | 12,395  | 5,153   | 24.7 | 20.3 | 26.9 | 8.5  | -1.2 | 0.2  | -1.4 | 0.1 | -1.0 | 0.8  | -1.1 | 0.4 | 1.2  | 0.1  | 1.3   | 0.04 |
| P00101583  | FLJ25894  | H1 protein                                                                    | 94.8%  | TAVMMASSALVGVVHVAHYHAK | 3 | 98.0% | 1 | 2 | 4,700,045 | 4,902,160 | 4,902,160 | 5,380,265 | 331,438 | 300,944 | 286,521 | 162,698 | 15.8 | 13.2 | 12.1 | 8.8  | 1.1  | 0.4  | 1.0  | 0.7 | 1.1  | 0.1  | -1.0 | 0.7 | 1.1  | 0.4  | 1.1   | 0.2  |
| P001071934 | FLJ25894  | cDNA FLJ25894 is, clone TST04471                                              | 94.8%  | 7.8                    | 1 | 1     | 1 | 2 | 4,700,055 | 5,096,360 | 4,902,160 | 5,380,265 | 331,438 | 300,944 | 286,521 | 162,698 | 15.8 | 13.2 | 13.1 | 8.8  | 1.1  | 0.4  | 1.0  | 0.7 | 1.1  | 0.1  | -1.0 | 0.7 | 1.1  | 0.4  | 1.1   | 0.2  |
| P001017200 | FLJ25894  | Uncharacterized protein                                                       | 94.8%  | LDMFLCFLSVRLR          | 3 | 94.8% | 1 | 1 | 4,700,055 | 5,096,360 | 4,902,160 | 5,380,265 | 331,438 | 300,944 | 286,521 | 162,698 | 15.8 | 13.2 | 13.1 | 8.8  | 1.1  | 0.4  | 1.0  | 0.7 | 1.1  | 0.1  | -1.0 | 0.7 | 1.1  | 0.4  | 1.1   | 0.2  |
| P001017918 | PRPF31    | Isom 2 of U4U5 small nuclear ribonucleoprotein Prp31                          | 99.6%  | 1.1                    | 2 | 2     | 3 | 5 | 1,484,524 | 1,533,621 | 1,434,796 | 1,735,887 | 128,078 | 104,145 | 85,562  | 92,030  | 19.3 | 15.2 | 13.3 | 11.9 | 1.0  | 0.8  | -1.0 | 0.8 | 1.2  | 0.1  | -1.1 | 0.5 | 1.1  | 0.2  | 1.2   | 0.04 |
| P000575754 | PRPF31    | Uncharacterized protein                                                       | 99.6%  | 11.5                   | 2 | 2     | 3 | 5 | 1,484,524 | 1,533,621 | 1,434,796 | 1,735,887 | 128,078 | 104,145 | 85,562  | 92,030  | 19.3 | 15.2 | 13.3 | 11.9 | 1.0  | 0.8  | -1.0 | 0.8 | 1.2  | 0.1  | -1.1 | 0.5 | 1.1  | 0.2  | 1.2   | 0.04 |
| P000577783 | PRPF31    | Uncharacterized protein                                                       | 99.6%  | 10.9                   | 2 | 2     | 3 | 5 | 1,484,524 | 1,533,621 | 1,434,796 | 1,735,887 | 128,078 | 104,145 | 85,562  | 92,030  | 19.3 | 15.2 | 13.3 | 11.9 | 1.0  | 0.8  | -1.0 | 0.8 | 1.2  | 0.1  | -1.1 | 0.5 | 1.1  | 0.2  | 1.2   | 0.04 |
| P000739088 | PRPF31    | cDNA FLJ25957, highly similar to U4U5 small nuclear ribonucleoprotein Prp31   | 99.6%  | 6.7                    | 2 | 2     | 3 | 5 | 1,484,524 | 1,533,621 | 1,434,796 | 1,735,887 | 128,078 | 104,145 | 85,562  | 92,030  | 19.3 | 15.2 | 13.3 | 11.9 | 1.0  | 0.8  | -1.0 | 0.8 | 1.2  | 0.1  | -1.1 | 0.5 | 1.1  | 0.2  | 1.2   | 0.04 |
| P000939863 | PRPF31    | Uncharacterized protein                                                       | 99.6%  | 10.6                   | 2 | 2     | 3 | 5 | 1,484,524 | 1,533,621 | 1,434,796 | 1,735,887 | 128,078 | 104,145 | 85,562  | 92,030  | 19.3 | 15.2 | 13.3 | 11.9 | 1.0  | 0.8  | -1.0 | 0.8 | 1.2  | 0.1  | -1.1 | 0.5 | 1.1  | 0.2  | 1.2   | 0.04 |
| P001017202 | -         | 64 kDa protein                                                                | 97.6%  | 1.3                    | 1 | 1     | 1 | 2 | 2,847,015 | 2,673,320 | 3,220,650 | 3,280,390 | 425,273 | 234,576 | 397,363 | 551,263 | 33.4 | 19.6 | 24.8 | 37.6 | -1.1 | 0.7  | 1.1  | 0.5 | 1.2  | 0.6  | 1.2  | 0.2 | 1.2  | 0.3  | 1.0   | 0.9  |
| P001017203 | FAM187B   | Protein FAM187B                                                               | 97.6%  | 1.9                    | 1 | 1     | 1 | 2 | 2,847,015 | 2,673,320 | 3,220,650 | 3,280,390 | 425,273 | 234,576 | 397,363 | 551,263 | 33.4 | 19.6 | 24.8 | 37.6 | -1.1 | 0.7  | 1.1  | 0.5 | 1.2  | 0.6  | 1.2  | 0.2 | 1.2  | 0.3  | 1.0   | 0.9  |
| P001017490 | TOLLIP    | cDNA FLJ39374, clone PEBL2M00576, highly similar to Homo sapiens TOLLIP       | 99.1%  | 6.6                    | 1 | 1     | 2 | 2 | 1,112,658 | 882,710   | 940,738   | 1,038,240 | 120,456 | 39,853  | 45,571  | 83,529  | 24.2 | 10.1 | 10.8 | 18.0 | -1.3 | 0.1  | -1.2 | 0.2 | -1.1 | 0.6  | 1.1  | 0.4 | 1.2  | 0.1  | 1.1   | 0.3  |
| P000979274 | TOLLIP    | Uncharacterized protein                                                       | 99.1%  | 17.5                   | 1 | 1     | 2 | 2 | 1,112,658 | 882,710   | 940,738   | 1,038,240 | 120,456 | 39,853  | 45,571  | 83,529  | 24.2 | 10.1 | 10.8 | 18.0 | -1.3 | 0.1  | -1.2 | 0.2 | -1.1 | 0.6  | 1.1  | 0.4 | 1.2  | 0.1  | 1.1   | 0.3  |
| P001017510 | PIGR2     | Isom 1 of Prostaglandin reductase 2                                           | 99.6%  | 6.8                    | 2 | 2     | 2 | 2 | 4,052,105 | 4,299,125 | 3,948,970 | 4,542,025 | 583,377 | 177,458 | 235,580 | 237,955 | 32.2 | 9.2  | 13.3 | 11.7 | 1.1  | 0.7  | -1.0 | 0.9 | 1.1  | 0.5  | -1.1 | 0.3 | 1.1  | 0.4  | 1.2   | 0.1  |
| P000869302 | PIGR2     | Isom 2 of Prostaglandin reductase 2                                           | 99.6%  | 13.3                   | 2 | 2     | 2 | 2 | 4,052,105 | 4,299,125 | 3,948,970 | 4,542,025 | 583,377 | 177,458 | 235,580 | 237,955 | 32.2 | 9.2  | 13.3 | 11.7 | 1.1  | 0.7  | -1.0 | 0.9 | 1.1  | 0.5  | -1.1 | 0.3 | 1.1  | 0.4  | 1.2   | 0.1  |
| P001017520 | -         | 87 kDa protein                                                                | 97.8%  | 1.2                    | 2 | 2     | 2 | 2 | 4,052,105 | 4,299,125 | 3,948,970 | 4,542,025 | 583,377 | 177,458 | 235,580 | 237,955 | 32.2 | 9.2  | 13.3 | 11.7 | 1.1  | 0.7  | -1.0 | 0.9 | 1.1  | 0.5  | -1.1 | 0.3 | 1.1  | 0.4  | 1.2   | 0.1  |
| P001017521 | -         | 87 kDa protein                                                                | 97.8%  | 1.2                    | 2 | 2     | 2 | 2 | 4,052,105 | 4,299,125 | 3,948,970 | 4,542,025 | 583,377 | 177,458 | 235,580 | 237,955 | 32.2 | 9.2  | 13.3 | 11.7 | 1.1  | 0.7  | -1.0 | 0.9 | 1.1  | 0.5  | -1.1 | 0.3 | 1.1  | 0.4  | 1.2   | 0.1  |
| P001017572 | FAM88B    | Protein FAM88B                                                                | 99.6%  | 3.9                    | 1 | 1     | 1 | 2 | 863,225   | 824,885   | 895,570   | 946,780   | 98,812  | 65,293  | 104,229 | 63,420  | 25.6 | 15.8 | 27.2 | 15.0 | 1.1  | 0.8  | -1.0 | 1.1 | 0.5  | -1.1 | 0.6  | 1.0 | 0.8  | 1.1  | 0.5   |      |
| P000706863 | FAM88B    | family with sequence similarity 98, member B isom 1                           | 99.6%  | 3.0                    | 1 | 1     | 1 | 2 | 863,225   | 824,885   | 895,570   | 946,780   | 98,812  | 65,293  | 104,229 | 63,420  | 25.6 | 15.8 | 27.2 | 15.0 | 1.1  | 0.8  | -1.0 | 1.1 | 0.5  | -1.1 | 0.6  | 1.0 | 0.8  | 1.1  | 0.5   |      |
| P001017612 | ABHD14B   | Isom 1 of Abhydrolase domain-containing protein 14B                           | 100.0% | 12.8                   | 1 | 1     | 1 | 2 | 1,328,214 | 1,423,898 | 1,413,762 | 1,538,308 | 138,086 | 68,331  | 128,475 | 75,077  | 22.9 | 9.2  | 20.5 | 10.9 | 1.1  | 0.5  | 1.1  | 0.7 | 1.2  | 0.2  | -1.0 | 0.9 | 1.1  | 0.3  | 1.1   | 0.4  |
| P001017620 | ABHD14B   | Isom 2 of Abhydrolase domain-containing protein 14B                           | 100.0% | 16.3                   | 1 | 1     | 1 | 2 | 1,328,214 | 1,423,898 | 1,413,762 | 1,538,308 | 138,086 | 68,331  | 128,475 | 75,077  | 22.9 | 9.2  | 20.5 | 10.9 | 1.1  | 0.5  | 1.1  | 0.7 | 1.2  | 0.2  | -1.0 | 0.9 | 1.1  | 0.3  | 1.1   | 0.4  |
| P001017691 | PLDCL1    | Isom 1 of Poly(A)-specific ribonuclease PARN-like domain-containing protein 1 | 98.7%  | 5.8                    | 1 | 1     | 1 | 2 | 830,557   | 974,410   | 783,041   | 911,775   | 137,317 | 83,374  | 122,623 | 67,685  | 37.0 | 21.4 | 34.6 | 16.6 | 1.2  | 0.4  | -1.0 | 0.8 | 1.1  | 0.6  | -1.2 | 0.3 | -1.1 | 0.6  | 1.1   | 0.4  |
| P001017692 | PLDCL1    | Isom 2 of Poly(A)-specific ribonuclease PARN-like domain-containing protein 1 | 98.7%  | 17                     | 1 | 1     | 1 | 2 | 830,557   | 974,410   | 783,041   | 911,775   | 137,317 | 83,374  | 122,623 | 67,685  | 37.0 | 21.4 | 34.6 | 16.6 | 1.2  | 0.4  | -1.0 | 0.8 | 1.1  | 0.6  | -1.2 | 0.3 | -1.1 | 0.6  | 1.1   | 0.4  |
| P001017941 | MDM1      | Mdm1                                                                          | 96.9%  | 1.0                    | 2 | 2     | 1 | 1 | 6,190,918 | 7,584,742 | 7,698,091 | 8,822,680 | 748,528 | 738,480 | 882,568 | 747,432 | 27.0 | 21.7 | 25.6 | 18.9 | 1.2  | 0.2  | 1.2  | 1.4 | 0.04 | 1.0  | 0.9  | 1.2 | 0.3  | 1.1  | 0.4   |      |
| P001018133 | ARHGAP10L | Isom 4 of Rho guanine nucleotide exchange factor 10-like protein              | 97.4%  | 1.6                    | 1 | 1     | 1 | 8 | 47,788    | 44,582    | 41,768    | 47,193    | 10,701  | 5,171   | 5,998   | 1,810   | 50.1 | 25.9 | 32.1 | 8.6  | -1.1 | 0.8  | -1.1 | 0.6 | -1.0 | 1.1  | -1.1 | 0.7 | 1.1  | 0.7  | 1.1   | 0.4  |
| P000471811 | ARHGAP10L | Isom 2 of Rho guanine nucleotide exchange factor 10-like protein              | 97.4%  | 1.5                    | 1 | 1     | 1 | 8 | 47,788    | 44,582    | 41,768    | 47,193    | 10,701  | 5,171   | 5,998   | 1,810   | 50.1 | 25.9 | 32.1 | 8.6  | -1.1 | 0.8  | -1.1 | 0.6 | -1.0 | 1.1  | -1.1 | 0.7 | 1.1  | 0.7  | 1.1   | 0.4  |
| P000513819 | ARHGAP10L | Isom 1 of Rho guanine nucleotide exchange factor 10-like protein              | 97.4%  | 1.3                    | 1 | 1     | 1 | 8 | 47,       |           |           |           |         |         |         |         |      |      |      |      |      |      |      |     |      |      |      |     |      |      |       |      |









|            |                 |                                        |        |                       |    |        |    |   |             |             |             |             |           |         |           |         |      |      |      |      |      |     |      |     |      |      |      |     |      |       |     |      |     |  |  |  |
|------------|-----------------|----------------------------------------|--------|-----------------------|----|--------|----|---|-------------|-------------|-------------|-------------|-----------|---------|-----------|---------|------|------|------|------|------|-----|------|-----|------|------|------|-----|------|-------|-----|------|-----|--|--|--|
| P000413061 | CALB2           | calretinin isoform 22k                 | 100.0% | 19.8                  | 4  | 4      | 5  | 2 | 18,877,010  | 19,783,847  | 19,009,947  | 21,933,300  | 1,401,835 | 925,174 | 1,326,758 | 446,716 | 15.8 | 10.5 | 15.6 | 4.6  | -1.0 | 1   | -1.0 | 0.7 | 1.1  | 0.2  | -1.0 | 0.6 | 1.1  | 0.07  | 1.2 | 0.09 |     |  |  |  |
|            |                 |                                        |        | ELENPQEEK             | 2  | 99.9%  | 2  |   |             |             |             |             |           |         |           |         |      |      |      |      |      |     |      |     |      |      |      |     |      |       |     |      |     |  |  |  |
|            |                 |                                        |        | LELSRMR               | 2  | 99.9%  | 1  |   |             |             |             |             |           |         |           |         |      |      |      |      |      |     |      |     |      |      |      |     |      |       |     |      |     |  |  |  |
|            |                 |                                        |        | LOEYTOTLR             | 2  | 99.9%  | 1  |   |             |             |             |             |           |         |           |         |      |      |      |      |      |     |      |     |      |      |      |     |      |       |     |      |     |  |  |  |
|            |                 |                                        |        | MFDNGDGK              | 2  | 99.9%  | 1  |   |             |             |             |             |           |         |           |         |      |      |      |      |      |     |      |     |      |      |      |     |      |       |     |      |     |  |  |  |
|            |                 |                                        |        | ZD                    | 2  | 2      | 3  |   | 10,784,360  | 10,419,580  | 9,880,368   | 11,631,033  | 619,536   | 476,664 | 503,622   | 281,533 | 12.9 | 10.2 | 11.4 | 5.4  | -1.0 | 0.7 | -1.1 | 0.3 | 1.1  | 0.2  | -1.1 | 0.5 | 1.1  | 0.06  | 1.2 | 0.02 |     |  |  |  |
|            |                 |                                        |        | ZD                    | 2  | 2      | 3  |   | 10,784,360  | 10,419,580  | 9,880,368   | 11,631,033  | 619,536   | 476,664 | 503,622   | 281,533 | 12.9 | 10.2 | 11.4 | 5.4  | -1.0 | 0.7 | -1.1 | 0.3 | 1.1  | 0.2  | -1.1 | 0.5 | 1.1  | 0.06  | 1.2 | 0.02 |     |  |  |  |
|            |                 |                                        |        | 5.1                   | 2  | 2      | 3  |   | 10,784,360  | 10,419,580  | 9,880,368   | 11,631,033  | 619,536   | 476,664 | 503,622   | 281,533 | 12.9 | 10.2 | 11.4 | 5.4  | -1.0 | 0.7 | -1.1 | 0.3 | 1.1  | 0.2  | -1.1 | 0.5 | 1.1  | 0.06  | 1.2 | 0.02 |     |  |  |  |
|            |                 |                                        |        | FOQVITDANK            | 2  | 98.2%  | 1  |   |             |             |             |             |           |         |           |         |      |      |      |      |      |     |      |     |      |      |      |     |      |       |     |      |     |  |  |  |
|            |                 |                                        |        | FSHLSYDQQLPSQQLMSK    | 3  | 99.0%  | 1  |   |             |             |             |             |           |         |           |         |      |      |      |      |      |     |      |     |      |      |      |     |      |       |     |      |     |  |  |  |
| P000186008 | STARD10         | PCTP-like protein                      | 100.0% | 36.1                  | 7  | 7      | 9  | 1 | 10,048,055  | 10,607,700  | 10,406,887  | 11,996,288  | 525,863   | 331,501 | 677,007   | 628,640 | 11.7 | 7.0  | 14.6 | 11.7 | 1.1  | 0.4 | 1.0  | 1.2 | 0.04 | -1.0 | 0.8  | 1.1 | 0.09 | 1.2   | 0.1 | 0.1  |     |  |  |  |
|            |                 |                                        |        | AGSYVAVVQEMIR         | 2  | 95.5%  | 1  |   |             |             |             |             |           |         |           |         |      |      |      |      |      |     |      |     |      |      |      |     |      |       |     |      |     |  |  |  |
|            |                 |                                        |        | AVSQTGYLQSTGPK        | 2  | 100.0% | 2  |   |             |             |             |             |           |         |           |         |      |      |      |      |      |     |      |     |      |      |      |     |      |       |     |      |     |  |  |  |
|            |                 |                                        |        | ESVQVDDQDFR           | 2  | 99.9%  | 2  |   |             |             |             |             |           |         |           |         |      |      |      |      |      |     |      |     |      |      |      |     |      |       |     |      |     |  |  |  |
|            |                 |                                        |        | MCCQVAFETVYDILHIEYR   | 3  | 99.9%  | 1  |   |             |             |             |             |           |         |           |         |      |      |      |      |      |     |      |     |      |      |      |     |      |       |     |      |     |  |  |  |
|            |                 |                                        |        | MSGAGGSSDQDLSL        | 3  | 93.9%  | 1  |   |             |             |             |             |           |         |           |         |      |      |      |      |      |     |      |     |      |      |      |     |      |       |     |      |     |  |  |  |
|            |                 |                                        |        | SCVITYLADDPK          | 2  | 99.5%  | 1  |   |             |             |             |             |           |         |           |         |      |      |      |      |      |     |      |     |      |      |      |     |      |       |     |      |     |  |  |  |
|            |                 |                                        |        | MSDNYVTRAK            | 2  | 99.2%  | 1  |   |             |             |             |             |           |         |           |         |      |      |      |      |      |     |      |     |      |      |      |     |      |       |     |      |     |  |  |  |
| P000186294 | EEF2            | Elongation factor 2                    | 100.0% | 41.7                  | 31 | 36     | 49 | 1 | 373,573,205 | 386,916,838 | 391,438,045 | 442,081,079 | *****     | *****   | *****     | *****   | 20.3 | 9.6  | 16.4 | 5.8  | 1.0  | 0.7 | 1.0  | 0.7 | 1.2  | 0.1  | 1.0  | 0.9 | 1.1  | 0.03  | 1.1 | 0.1  | 0.1 |  |  |  |
|            |                 |                                        |        | AGASRA                | 2  | 98.4%  | 1  |   |             |             |             |             |           |         |           |         |      |      |      |      |      |     |      |     |      |      |      |     |      |       |     |      |     |  |  |  |
|            |                 |                                        |        | ALLELELEPELYTOTFOR    | 2  | 100.0% | 2  |   |             |             |             |             |           |         |           |         |      |      |      |      |      |     |      |     |      |      |      |     |      |       |     |      |     |  |  |  |
|            |                 |                                        |        | ALLELEPELELYTOTFOR    | 3  | 100.0% | 2  |   |             |             |             |             |           |         |           |         |      |      |      |      |      |     |      |     |      |      |      |     |      |       |     |      |     |  |  |  |
|            |                 |                                        |        | ARPPFQDAEEDDNGEVSAR   | 3  | 100.0% | 2  |   |             |             |             |             |           |         |           |         |      |      |      |      |      |     |      |     |      |      |      |     |      |       |     |      |     |  |  |  |
|            |                 |                                        |        | AVLPVRESGFADLR        | 2  | 100.0% | 2  |   |             |             |             |             |           |         |           |         |      |      |      |      |      |     |      |     |      |      |      |     |      |       |     |      |     |  |  |  |
|            |                 |                                        |        | CELLYEGPPDEAMAGIK     | 2  | 100.0% | 1  |   |             |             |             |             |           |         |           |         |      |      |      |      |      |     |      |     |      |      |      |     |      |       |     |      |     |  |  |  |
|            |                 |                                        |        | EDLYKPKR              | 2  | 95.6%  | 1  |   |             |             |             |             |           |         |           |         |      |      |      |      |      |     |      |     |      |      |      |     |      |       |     |      |     |  |  |  |
|            |                 |                                        |        | EGLQLENMIR            | 2  | 99.9%  | 1  |   |             |             |             |             |           |         |           |         |      |      |      |      |      |     |      |     |      |      |      |     |      |       |     |      |     |  |  |  |
|            |                 |                                        |        | EGPILDNFDLK           | 2  | 99.9%  | 1  |   |             |             |             |             |           |         |           |         |      |      |      |      |      |     |      |     |      |      |      |     |      |       |     |      |     |  |  |  |
|            |                 |                                        |        | EGPILDNFDLK           | 2  | 100.0% | 3  |   |             |             |             |             |           |         |           |         |      |      |      |      |      |     |      |     |      |      |      |     |      |       |     |      |     |  |  |  |
|            |                 |                                        |        | EGVSYVYR              | 2  | 99.6%  | 1  |   |             |             |             |             |           |         |           |         |      |      |      |      |      |     |      |     |      |      |      |     |      |       |     |      |     |  |  |  |
|            |                 |                                        |        | GGGQIAPR              | 2  | 94.6%  | 1  |   |             |             |             |             |           |         |           |         |      |      |      |      |      |     |      |     |      |      |      |     |      |       |     |      |     |  |  |  |
|            |                 |                                        |        | GHVFEESQVAGTMMFVVK    | 2  | 100.0% | 1  |   |             |             |             |             |           |         |           |         |      |      |      |      |      |     |      |     |      |      |      |     |      |       |     |      |     |  |  |  |
|            |                 |                                        |        | GNVFEESQVAGTMMFVVK    | 3  | 87.6%  | 1  |   |             |             |             |             |           |         |           |         |      |      |      |      |      |     |      |     |      |      |      |     |      |       |     |      |     |  |  |  |
|            |                 |                                        |        | GVQVYLNK              | 2  | 99.9%  | 1  |   |             |             |             |             |           |         |           |         |      |      |      |      |      |     |      |     |      |      |      |     |      |       |     |      |     |  |  |  |
|            |                 |                                        |        | GVQVYLNKDSVAGSGQWTK   | 3  | 95.6%  | 1  |   |             |             |             |             |           |         |           |         |      |      |      |      |      |     |      |     |      |      |      |     |      |       |     |      |     |  |  |  |
|            |                 |                                        |        | GWVYVYVYR             | 2  | 99.9%  | 1  |   |             |             |             |             |           |         |           |         |      |      |      |      |      |     |      |     |      |      |      |     |      |       |     |      |     |  |  |  |
|            |                 |                                        |        | IWCFPGDGTGPNLTDIK     | 2  | 100.0% | 2  |   |             |             |             |             |           |         |           |         |      |      |      |      |      |     |      |     |      |      |      |     |      |       |     |      |     |  |  |  |
|            |                 |                                        |        | KEELYKPKR             | 2  | 92.2%  | 1  |   |             |             |             |             |           |         |           |         |      |      |      |      |      |     |      |     |      |      |      |     |      |       |     |      |     |  |  |  |
|            |                 |                                        |        | KWCFPGDGTGPNLTDIK     | 3  | 100.0% | 2  |   |             |             |             |             |           |         |           |         |      |      |      |      |      |     |      |     |      |      |      |     |      |       |     |      |     |  |  |  |
|            |                 |                                        |        | KVEDMMK               | 2  | 99.8%  | 2  |   |             |             |             |             |           |         |           |         |      |      |      |      |      |     |      |     |      |      |      |     |      |       |     |      |     |  |  |  |
|            |                 |                                        |        | MMSVAVVQNGK           | 2  | 100.0% | 1  |   |             |             |             |             |           |         |           |         |      |      |      |      |      |     |      |     |      |      |      |     |      |       |     |      |     |  |  |  |
|            |                 |                                        |        | MWALPK                | 1  | 98.6%  | 1  |   |             |             |             |             |           |         |           |         |      |      |      |      |      |     |      |     |      |      |      |     |      |       |     |      |     |  |  |  |
|            |                 |                                        |        | PSQVAVETR             | 2  | 95.2%  | 1  |   |             |             |             |             |           |         |           |         |      |      |      |      |      |     |      |     |      |      |      |     |      |       |     |      |     |  |  |  |
|            |                 |                                        |        | QFAMVYAK              | 2  | 99.0%  | 1  |   |             |             |             |             |           |         |           |         |      |      |      |      |      |     |      |     |      |      |      |     |      |       |     |      |     |  |  |  |
|            |                 |                                        |        | SAQVYR                | 2  | 100.0% | 1  |   |             |             |             |             |           |         |           |         |      |      |      |      |      |     |      |     |      |      |      |     |      |       |     |      |     |  |  |  |
|            |                 |                                        |        | STAIISLYESENDNFIR     | 2  | 100.0% | 2  |   |             |             |             |             |           |         |           |         |      |      |      |      |      |     |      |     |      |      |      |     |      |       |     |      |     |  |  |  |
|            |                 |                                        |        | STAIISLYESENDNFIR     | 3  | 100.0% | 1  |   |             |             |             |             |           |         |           |         |      |      |      |      |      |     |      |     |      |      |      |     |      |       |     |      |     |  |  |  |
|            |                 |                                        |        | TFQALDLPK             | 2  | 100.0% | 2  |   |             |             |             |             |           |         |           |         |      |      |      |      |      |     |      |     |      |      |      |     |      |       |     |      |     |  |  |  |
|            |                 |                                        |        | VFSGLVSTGLK           | 2  | 100.0% | 1  |   |             |             |             |             |           |         |           |         |      |      |      |      |      |     |      |     |      |      |      |     |      |       |     |      |     |  |  |  |
|            |                 |                                        |        | WLPAGDALLMTIRPSPYTAQK | 2  | 96.4%  | 1  |   |             |             |             |             |           |         |           |         |      |      |      |      |      |     |      |     |      |      |      |     |      |       |     |      |     |  |  |  |
|            |                 |                                        |        | WLPAGDALLMTIRPSPYTAQK | 3  | 100.0% | 1  |   |             |             |             |             |           |         |           |         |      |      |      |      |      |     |      |     |      |      |      |     |      |       |     |      |     |  |  |  |
|            |                 |                                        |        | YEWVDAEAR             | 2  | 100.0% | 2  |   |             |             |             |             |           |         |           |         |      |      |      |      |      |     |      |     |      |      |      |     |      |       |     |      |     |  |  |  |
|            |                 |                                        |        | YLAENVDAEAR           | 2  | 99.7%  | 1  |   |             |             |             |             |           |         |           |         |      |      |      |      |      |     |      |     |      |      |      |     |      |       |     |      |     |  |  |  |
|            |                 |                                        |        | YLAENVDAEAR           | 3  | 100.0% | 1  |   |             |             |             |             |           |         |           |         |      |      |      |      |      |     |      |     |      |      |      |     |      |       |     |      |     |  |  |  |
|            |                 |                                        |        | YVVEDVPGNIVSLVSDVDFLK | 2  | 100.0% | 2  |   |             |             |             |             |           |         |           |         |      |      |      |      |      |     |      |     |      |      |      |     |      |       |     |      |     |  |  |  |
| P000186346 | 10500560.LOC645 | barrier-to-autointegration factor-like | 100.0% | 41.9                  | 2  | 100%   | 4  | 1 | 6,013,385   | 5,687,178   | 5,905,498   | 6,621,170   | 472,888   | 196,064 | 546,907   | 86,031  | 17.6 | 7.7  | 20.7 | 2.9  | -1.1 | 0.5 | -1.0 | 0.9 | 1.1  | 0.3  | 1.0  | 0.7 | 1.2  | 0.002 | 1.1 | 0.3  | 0.3 |  |  |  |
|            |                 |                                        |        |                       |    |        |    |   |             |             |             |             |           |         |           |         |      |      |      |      |      |     |      |     |      |      |      |     |      |       |     |      |     |  |  |  |



|           |       |                                                         |        |                             |   |        |    |    |            |            |            |            |            |           |           |           |         |      |      |      |      |     |     |      |     |      |      |      |     |      |      |     |      |     |  |  |  |  |
|-----------|-------|---------------------------------------------------------|--------|-----------------------------|---|--------|----|----|------------|------------|------------|------------|------------|-----------|-----------|-----------|---------|------|------|------|------|-----|-----|------|-----|------|------|------|-----|------|------|-----|------|-----|--|--|--|--|
| P00478109 | USH1C | isoform 4 of Hamonin                                    | 97.7%  | 1.7                         | 1 | 1      | 1  | 5  | 1,501,286  | 1,788,704  | 1,683,132  | 1,849,090  | 114,269    | 102,179   | 142,464   | 48,694    | 17.0    | 12.8 | 20.1 | 5.9  | 1.2  | 0.1 | 1.1 | 0.7  | 1.2 | 0.02 | -1.1 | 0.3  | 1.0 | 0.6  | 1.2  | 0.1 |      |     |  |  |  |  |
| P00910909 | USH1C | cDNA FLJ15329, highly similar to Hamonin                | 97.7%  | 1.9                         | 1 | 1      | 1  | 5  | 1,501,286  | 1,788,704  | 1,683,132  | 1,849,090  | 114,269    | 102,179   | 142,464   | 48,694    | 17.0    | 12.8 | 20.1 | 5.9  | 1.2  | 0.1 | 1.1 | 0.7  | 1.2 | 0.02 | -1.1 | 0.3  | 1.0 | 0.6  | 1.2  | 0.1 |      |     |  |  |  |  |
| P00215884 | SRSF1 | isoform ASF-1 of Serine-arginine-rich splicing factor 1 | 100.0% | VVVSIVYFER                  | 2 | 97.7%  | 9  | 18 | 1          | 18,193,910 | 19,246,890 | 18,731,256 | 21,840,572 | 1,271,624 | 534,476   | 1,052,515 | 547,776 | 15.0 | 6.2  | 12.6 | 5.6  | 1.1 | 0.5 | 1.0  | 0.7 | 1.2  | 0.03 | -1.0 | 0.7 | 1.1  | 0.01 | 1.2 | 0.03 |     |  |  |  |  |
|           |       |                                                         |        | DGTGVYEVFR                  | 2 | 99.9%  | 2  |    |            |            |            |            |            |           |           |           |         |      |      |      |      |     |     |      |     |      |      |      |     |      |      |     |      |     |  |  |  |  |
|           |       |                                                         |        | DQYVDVGR                    | 2 | 100.0% | 2  |    |            |            |            |            |            |           |           |           |         |      |      |      |      |     |     |      |     |      |      |      |     |      |      |     |      |     |  |  |  |  |
|           |       |                                                         |        | EGGVYADVYR                  | 2 | 100.0% | 2  |    |            |            |            |            |            |           |           |           |         |      |      |      |      |     |     |      |     |      |      |      |     |      |      |     |      |     |  |  |  |  |
|           |       |                                                         |        | GGPRFVFEQPRMADAVYGR         | 3 | 99.9%  | 2  |    |            |            |            |            |            |           |           |           |         |      |      |      |      |     |     |      |     |      |      |      |     |      |      |     |      |     |  |  |  |  |
|           |       |                                                         |        | IYVGNLPPDR                  | 2 | 100.0% | 3  |    |            |            |            |            |            |           |           |           |         |      |      |      |      |     |     |      |     |      |      |      |     |      |      |     |      |     |  |  |  |  |
|           |       |                                                         |        | SKEGEATVIR                  | 2 | 100.0% | 3  |    |            |            |            |            |            |           |           |           |         |      |      |      |      |     |     |      |     |      |      |      |     |      |      |     |      |     |  |  |  |  |
|           |       |                                                         |        | TKDEDVFK                    | 2 | 100.0% | 2  |    |            |            |            |            |            |           |           |           |         |      |      |      |      |     |     |      |     |      |      |      |     |      |      |     |      |     |  |  |  |  |
|           |       |                                                         |        | TKDEDVFK                    | 3 | 85.6%  | 3  |    |            |            |            |            |            |           |           |           |         |      |      |      |      |     |     |      |     |      |      |      |     |      |      |     |      |     |  |  |  |  |
|           |       |                                                         |        | VVVSGLPPSSVQDLK             | 2 | 99.5%  | 1  |    |            |            |            |            |            |           |           |           |         |      |      |      |      |     |     |      |     |      |      |      |     |      |      |     |      |     |  |  |  |  |
| P00215888 | SRP2  | Signal recognition particle 72 kDa protein              | 97.9%  | 1.5                         | 1 | 1      | 1  | 2  | 3,435,565  | 3,325,190  | 3,733,210  | 3,751,370  | 123,484    | 271,166   | 84,862    | 205,336   | 8.0     | 18.2 | 5.1  | 12.2 | -1.0 | 0.7 | 1.1 | 0.08 | 1.1 | 0.2  | 1.1  | 0.2  | 1.1 | 0.2  | 1.1  | 0.2 | 0.9  |     |  |  |  |  |
| P0096670  | SRP2  | CalX kinase II isoform                                  | 97.9%  | 1.6                         | 1 | 1      | 2  | 2  | 3,435,565  | 3,325,190  | 3,733,210  | 3,751,370  | 123,484    | 271,166   | 84,862    | 205,336   | 8.0     | 18.2 | 5.1  | 12.2 | -1.0 | 0.7 | 1.1 | 0.08 | 1.1 | 0.2  | 1.1  | 0.2  | 1.1 | 0.2  | 1.0  | 0.5 |      |     |  |  |  |  |
|           |       |                                                         |        | LTAIEVSEFK                  | 2 | 97.9%  | 1  |    |            |            |            |            |            |           |           |           |         |      |      |      |      |     |     |      |     |      |      |      |     |      |      |     |      |     |  |  |  |  |
| P00215901 | AK2   | isoform 1 of Adenylate kinase 2, mitochondrial          | 100.0% | 44.4                        | 8 | 8      | 10 | 2  | 7,876,957  | 8,051,182  | 9,073,140  | 8,929,527  | 560,781    | 480,728   | 543,547   | 388,828   | 15.9    | 13.4 | 13.4 | 9.7  | 1.0  | 0.8 | 1.2 | 0.2  | 1.1 | 0.2  | 1.1  | 0.2  | 1.1 | 0.2  | 1.1  | 0.2 | 1.0  | 0.8 |  |  |  |  |
| P00215886 | AK2   | isoform 2 of Adenylate kinase 2, mitochondrial          | 100.0% | 45.7                        | 8 | 8      | 10 | 2  | 7,876,957  | 8,051,182  | 9,073,140  | 8,929,527  | 560,781    | 480,728   | 543,547   | 388,828   | 15.9    | 13.4 | 13.4 | 9.7  | 1.0  | 0.8 | 1.2 | 0.2  | 1.1 | 0.2  | 1.1  | 0.2  | 1.1 | 0.2  | 1.1  | 0.2 | 1.0  | 0.8 |  |  |  |  |
|           |       |                                                         |        | AMVASSSELRK                 | 2 | 99.9%  | 1  |    |            |            |            |            |            |           |           |           |         |      |      |      |      |     |     |      |     |      |      |      |     |      |      |     |      |     |  |  |  |  |
|           |       |                                                         |        | AVLLGPRGAK                  | 2 | 98.8%  | 1  |    |            |            |            |            |            |           |           |           |         |      |      |      |      |     |     |      |     |      |      |      |     |      |      |     |      |     |  |  |  |  |
|           |       |                                                         |        | EKLDSVFEVPSQLLR             | 2 | 98.9%  | 1  |    |            |            |            |            |            |           |           |           |         |      |      |      |      |     |     |      |     |      |      |      |     |      |      |     |      |     |  |  |  |  |
|           |       |                                                         |        | GIHSADIASQIPVVFASLAAFSK     | 3 | 100.0% | 1  |    |            |            |            |            |            |           |           |           |         |      |      |      |      |     |     |      |     |      |      |      |     |      |      |     |      |     |  |  |  |  |
|           |       |                                                         |        | LDGVFEVPSQLLR               | 2 | 99.9%  | 1  |    |            |            |            |            |            |           |           |           |         |      |      |      |      |     |     |      |     |      |      |      |     |      |      |     |      |     |  |  |  |  |
|           |       |                                                         |        | LGAVYVQDITVSEVYR            | 3 | 100.0% | 1  |    |            |            |            |            |            |           |           |           |         |      |      |      |      |     |     |      |     |      |      |      |     |      |      |     |      |     |  |  |  |  |
|           |       |                                                         |        | LVSDGMVLELKK                | 2 | 100.0% | 2  |    |            |            |            |            |            |           |           |           |         |      |      |      |      |     |     |      |     |      |      |      |     |      |      |     |      |     |  |  |  |  |
|           |       |                                                         |        | QAEMLDQLEK                  | 2 | 100.0% | 2  |    |            |            |            |            |            |           |           |           |         |      |      |      |      |     |     |      |     |      |      |      |     |      |      |     |      |     |  |  |  |  |
| P00215911 | APEX1 | DNA-(apurinic or apyrimidinic site) lyase               | 100.0% | 33.0                        | 6 | 6      | 7  | 1  | 20,772,772 | 22,251,173 | 21,486,800 | 24,736,790 | 3,434,317  | 1,096,049 | 2,243,221 | 1,194,427 | 37.0    | 11.0 | 23.3 | 10.8 | 1.1  | 0.7 | 1.0 | 0.9  | 1.2 | 0.3  | -1.0 | 0.8  | 1.1 | 0.2  | 1.2  | 0.2 | 0.2  |     |  |  |  |  |
|           |       |                                                         |        | GAVAEQDGLRTEPEAK            | 2 | 88.2%  | 1  |    |            |            |            |            |            |           |           |           |         |      |      |      |      |     |     |      |     |      |      |      |     |      |      |     |      |     |  |  |  |  |
|           |       |                                                         |        | GLDWRVKEAPDQLDQETK          | 3 | 99.4%  | 1  |    |            |            |            |            |            |           |           |           |         |      |      |      |      |     |     |      |     |      |      |      |     |      |      |     |      |     |  |  |  |  |
|           |       |                                                         |        | IKSNWVQDLR                  | 2 | 99.6%  | 2  |    |            |            |            |            |            |           |           |           |         |      |      |      |      |     |     |      |     |      |      |      |     |      |      |     |      |     |  |  |  |  |
|           |       |                                                         |        | IGVAAEQDGLRTEPEAK           | 3 | 97.4%  | 1  |    |            |            |            |            |            |           |           |           |         |      |      |      |      |     |     |      |     |      |      |      |     |      |      |     |      |     |  |  |  |  |
|           |       |                                                         |        | NAQFPDQR                    | 2 | 94.3%  | 1  |    |            |            |            |            |            |           |           |           |         |      |      |      |      |     |     |      |     |      |      |      |     |      |      |     |      |     |  |  |  |  |
|           |       |                                                         |        | QDGEGLDVAIVADSR             | 2 | 100.0% | 1  |    |            |            |            |            |            |           |           |           |         |      |      |      |      |     |     |      |     |      |      |      |     |      |      |     |      |     |  |  |  |  |
| P00215914 | ARF1  | ADP-ribosylation factor 1                               | 100.0% | 43.7                        | 6 | 7      | 10 | 2  | 9,378,106  | 9,533,708  | 10,044,075 | 10,278,027 | 595,782    | 257,460   | 546,045   | 241,366   | 14.2    | 6.0  | 12.2 | 5.3  | 1.0  | 0.8 | 1.1 | 0.4  | 1.1 | 0.2  | 1.1  | 0.4  | 1.1 | 0.07 | 1.0  | 0.7 | 1.0  | 0.7 |  |  |  |  |
| P00215917 | ARF3  | ADP-ribosylation factor 3                               | 100.0% | 43.7                        | 6 | 7      | 10 | 2  | 9,378,106  | 9,533,708  | 10,044,075 | 10,278,027 | 595,782    | 257,460   | 546,045   | 241,366   | 14.2    | 6.0  | 12.2 | 5.3  | 1.0  | 0.8 | 1.1 | 0.4  | 1.1 | 0.2  | 1.1  | 0.4  | 1.1 | 0.07 | 1.0  | 0.7 | 1.0  | 0.7 |  |  |  |  |
|           |       |                                                         |        | ILMAGDNRK                   | 2 | 100.0% | 2  |    |            |            |            |            |            |           |           |           |         |      |      |      |      |     |     |      |     |      |      |      |     |      |      |     |      |     |  |  |  |  |
|           |       |                                                         |        | LGEVITPTIGFNVIEYK           | 2 | 100.0% | 2  |    |            |            |            |            |            |           |           |           |         |      |      |      |      |     |     |      |     |      |      |      |     |      |      |     |      |     |  |  |  |  |
|           |       |                                                         |        | LGEVITPTIGFNVIEYK           | 3 | 100.0% | 1  |    |            |            |            |            |            |           |           |           |         |      |      |      |      |     |     |      |     |      |      |      |     |      |      |     |      |     |  |  |  |  |
|           |       |                                                         |        | MLAESELR                    | 2 | 88.1%  | 1  |    |            |            |            |            |            |           |           |           |         |      |      |      |      |     |     |      |     |      |      |      |     |      |      |     |      |     |  |  |  |  |
|           |       |                                                         |        | MLAEELRQAVLLVFNK            | 2 | 100.0% | 2  |    |            |            |            |            |            |           |           |           |         |      |      |      |      |     |     |      |     |      |      |      |     |      |      |     |      |     |  |  |  |  |
|           |       |                                                         |        | NSPTLVWVGGDQK               | 2 | 100.0% | 1  |    |            |            |            |            |            |           |           |           |         |      |      |      |      |     |     |      |     |      |      |      |     |      |      |     |      |     |  |  |  |  |
|           |       |                                                         |        | QDPRNANAEETIK               | 2 | 100.0% | 2  |    |            |            |            |            |            |           |           |           |         |      |      |      |      |     |     |      |     |      |      |      |     |      |      |     |      |     |  |  |  |  |
| P00215918 | ARF4  | ADP-ribosylation factor 4                               | 100.0% | 51.7                        | 6 | 7      | 8  | 1  | 16,985,509 | 18,054,760 | 19,455,116 | 19,573,331 | 1,546,992  | 854,087   | 1,489,283 | 493,406   | 20.4    | 10.6 | 17.1 | 5.6  | 1.1  | 0.8 | 1.1 | 0.3  | 1.2 | 0.2  | 1.1  | 0.4  | 1.1 | 0.2  | 1.0  | 0.9 | 0.9  |     |  |  |  |  |
|           |       |                                                         |        | LMVGLDNRK                   | 2 | 100.0% | 1  |    |            |            |            |            |            |           |           |           |         |      |      |      |      |     |     |      |     |      |      |      |     |      |      |     |      |     |  |  |  |  |
|           |       |                                                         |        | QRYVAELQK                   | 2 | 99.9%  | 1  |    |            |            |            |            |            |           |           |           |         |      |      |      |      |     |     |      |     |      |      |      |     |      |      |     |      |     |  |  |  |  |
|           |       |                                                         |        | LGEVITPTIGFNVIEYK           | 2 | 100.0% | 2  |    |            |            |            |            |            |           |           |           |         |      |      |      |      |     |     |      |     |      |      |      |     |      |      |     |      |     |  |  |  |  |
|           |       |                                                         |        | LGEVITPTIGFNVIEYK           | 3 | 100.0% | 1  |    |            |            |            |            |            |           |           |           |         |      |      |      |      |     |     |      |     |      |      |      |     |      |      |     |      |     |  |  |  |  |
|           |       |                                                         |        | MLVLELR                     | 2 | 94.7%  | 1  |    |            |            |            |            |            |           |           |           |         |      |      |      |      |     |     |      |     |      |      |      |     |      |      |     |      |     |  |  |  |  |
|           |       |                                                         |        | QDLNMAUSEMTDK               | 2 | 93.9%  | 1  |    |            |            |            |            |            |           |           |           |         |      |      |      |      |     |     |      |     |      |      |      |     |      |      |     |      |     |  |  |  |  |
|           |       |                                                         |        | TWYVQVCAIQGSLYELGLDMLNLSLKK | 3 | 97.9%  | 1  |    |            |            |            |            |            |           |           |           |         |      |      |      |      |     |     |      |     |      |      |      |     |      |      |     |      |     |  |  |  |  |
| P00215918 | ARF5  | ADP-ribosylation factor 5                               | 100.0% | 25.1                        | 4 | 6      | 2  | 4  | 4,158,738  | 4,150,221  | 4,213,868  | 4,416,992  | 389,502    | 243,047   | 445,975   | 137,699   | 20.9    | 13.1 | 23.7 | 7.0  |      |     |     |      |     |      |      |      |     |      |      |     |      |     |  |  |  |  |









|            |        |                                                                                    |        |     |        |    |    |            |            |            |            |            |           |           |           |           |      |      |      |      |      |      |      |      |       |      |      |     |      |      |      |     |  |  |  |  |
|------------|--------|------------------------------------------------------------------------------------|--------|-----|--------|----|----|------------|------------|------------|------------|------------|-----------|-----------|-----------|-----------|------|------|------|------|------|------|------|------|-------|------|------|-----|------|------|------|-----|--|--|--|--|
| P00079552  | SPAG9  | isoform 3 of C-Jun-amino-terminal kinase-interacting protein 4                     | 99.3%  | 2   | 2      | 2  | 2  | 8          | 899,259    | 1,018,343  | 911,966    | 1,064,709  | 130,898   | 88,619    | 82,109    | 68,107    | 32.6 | 19.5 | 20.1 | 14.3 | 1.1  | 0.5  | 1.0  | 0.9  | 1.2   | 0.3  | -1.1 | 0.4 | 1.0  | 0.7  | 1.2  | 0.2 |  |  |  |  |
| P01011459  | SPAG9  | cDNA FLJ59325, highly similar to C-Jun-amino-terminal kinase-interacting protein 4 | 99.3%  | 1   | 2      | 2  | 2  | 8          | 899,259    | 1,018,343  | 911,966    | 1,064,709  | 130,898   | 88,619    | 82,109    | 68,107    | 32.6 | 19.5 | 20.1 | 14.3 | 1.1  | 0.5  | 1.0  | 0.9  | 1.2   | 0.3  | -1.1 | 0.4 | 1.0  | 0.7  | 1.2  | 0.2 |  |  |  |  |
|            |        | HEVQVGR                                                                            |        | 2   | 2      | 2  | 2  | 8          | 899,259    | 1,018,343  | 911,966    | 1,064,709  | 130,898   | 88,619    | 82,109    | 68,107    | 32.6 | 19.5 | 20.1 | 14.3 | 1.1  | 0.5  | 1.0  | 0.9  | 1.2   | 0.3  | -1.1 | 0.4 | 1.0  | 0.7  | 1.2  | 0.2 |  |  |  |  |
|            |        | LMELGEAVR                                                                          |        | 2   | 2      | 2  | 2  | 8          | 899,259    | 1,018,343  | 911,966    | 1,064,709  | 130,898   | 88,619    | 82,109    | 68,107    | 32.6 | 19.5 | 20.1 | 14.3 | 1.1  | 0.5  | 1.0  | 0.9  | 1.2   | 0.3  | -1.1 | 0.4 | 1.0  | 0.7  | 1.2  | 0.2 |  |  |  |  |
|            |        | 5_4                                                                                |        | 1   | 1      | 1  | 1  | 1          | 1,602,300  | 1,837,376  | 2,094,700  | 1,866,430  | 134,837   | 120,910   | 207,446   | 74,708    | 18.8 | 14.7 | 22.1 | 9.0  | 1.1  | 0.2  | 1.3  | 0.08 | 1.2   | 0.1  | 1.1  | 0.3 | 1.0  | 0.8  | -1.1 | 0.3 |  |  |  |  |
| P00218106  | TCEA1  | isoform 2 of Transcription elongation factor I protein 1                           | 91.6%  | 3   | 4      | 3  | 4  | 4          | 1,602,300  | 1,837,376  | 2,094,700  | 1,866,430  | 134,837   | 120,910   | 207,446   | 74,708    | 18.8 | 14.7 | 22.1 | 9.0  | 1.1  | 0.2  | 1.3  | 0.08 | 1.2   | 0.1  | 1.1  | 0.3 | 1.0  | 0.8  | -1.1 | 0.3 |  |  |  |  |
|            |        | MTAEELQEKEMKR                                                                      |        | 3   | 4      | 3  | 4  | 4          | 1,602,300  | 1,837,376  | 2,094,700  | 1,866,430  | 134,837   | 120,910   | 207,446   | 74,708    | 18.8 | 14.7 | 22.1 | 9.0  | 1.1  | 0.2  | 1.3  | 0.08 | 1.2   | 0.1  | 1.1  | 0.3 | 1.0  | 0.8  | -1.1 | 0.3 |  |  |  |  |
| P00218134  | PYGM   | Glycogen phosphorylase, muscle form                                                | 100.0% | 5   | 5      | 6  | 2  | 2          | 8,156,445  | 8,162,642  | 8,292,452  | 8,758,661  | 497,989   | 356,575   | 233,981   | 331,568   | 13.7 | 9.8  | 6.3  | 8.5  | 1.0  | 1    | 1.0  | 0.8  | 1.1   | 0.3  | 1.1  | 0.3 | 1.1  | 0.3  | 1.1  | 0.3 |  |  |  |  |
| P01009320  | PYGM   | Phosphorylase                                                                      | 100.0% | 5   | 5      | 6  | 2  | 2          | 8,156,445  | 8,162,642  | 8,292,452  | 8,758,661  | 497,989   | 356,575   | 233,981   | 331,568   | 13.7 | 9.8  | 6.3  | 8.5  | 1.0  | 1    | 1.0  | 0.8  | 1.1   | 0.3  | 1.1  | 0.3 | 1.1  | 0.3  | 1.1  | 0.3 |  |  |  |  |
|            |        | VIPADLSEQSTAGTASSTGNMVK                                                            |        | 2   | 100.0% | 1  |    |            |            |            |            |            |           |           |           |           |      |      |      |      |      |      |      |      |       |      |      |     |      |      |      |     |  |  |  |  |
|            |        | VIPADLSEQSTAGTASSTGNMVK                                                            |        | 3   | 100.0% | 1  |    |            |            |            |            |            |           |           |           |           |      |      |      |      |      |      |      |      |       |      |      |     |      |      |      |     |  |  |  |  |
|            |        | 2_VLPNDNFEGK                                                                       |        | 2   | 100.0% | 2  |    |            |            |            |            |            |           |           |           |           |      |      |      |      |      |      |      |      |       |      |      |     |      |      |      |     |  |  |  |  |
|            |        | YFQFNFK                                                                            |        | 2   | 100.0% | 2  |    |            |            |            |            |            |           |           |           |           |      |      |      |      |      |      |      |      |       |      |      |     |      |      |      |     |  |  |  |  |
| P00218200  | BCAP31 | B-cell receptor-associated protein 31                                              | 95.5%  | 1   | 1      | 1  | 2  | 2          | 3,303,325  | 3,500,726  | 3,414,000  | 3,490,545  | 218,711   | 110,255   | 118,518   | 151,881   | 14.8 | 7.0  | 7.8  | 9.7  | 1.1  | 0.4  | 1.0  | 0.7  | 1.1   | 0.5  | -1.0 | 0.6 | -1.0 | 1    | 1.0  | 0.7 |  |  |  |  |
| P01009550  | BCAP31 | B-cell receptor-associated protein 31 isoform a                                    | 95.5%  | 2   | 2      | 1  | 1  | 2          | 3,303,325  | 3,500,726  | 3,414,000  | 3,490,545  | 218,711   | 110,255   | 118,518   | 151,881   | 14.8 | 7.0  | 7.8  | 9.7  | 1.1  | 0.4  | 1.0  | 0.7  | 1.1   | 0.5  | -1.0 | 0.6 | -1.0 | 1    | 1.0  | 0.7 |  |  |  |  |
|            |        | AEELEAMR                                                                           |        | 1   | 1      | 1  | 1  | 2          | 3,303,325  | 3,500,726  | 3,414,000  | 3,490,545  | 218,711   | 110,255   | 118,518   | 151,881   | 14.8 | 7.0  | 7.8  | 9.7  | 1.1  | 0.4  | 1.0  | 0.7  | 1.1   | 0.5  | -1.0 | 0.6 | -1.0 | 1    | 1.0  | 0.7 |  |  |  |  |
| P00218238  | PP1CB  | Serine/threonine-protein phosphatase PP1-beta catalytic subunit                    | 100.0% | 7   | 7      | 9  | 1  | 10,044,856 | 11,349,948 | 10,724,849 | 12,305,356 | 557,584    | 660,445   | 765,016   | 224,741   | 12.4      | 13.0 | 16.0 | 4.1  | 1.1  | 0.2  | 1.1  | 0.5  | 1.2  | 0.006 | -1.1 | 0.6  | 1.1 | 0.2  | 1.1  | 0.1  | 6.1 |  |  |  |  |
|            |        | ERLSSPRLLEAPLK                                                                     |        | 2   | 100.0% | 2  |    |            |            |            |            |            |           |           |           |           |      |      |      |      |      |      |      |      |       |      |      |     |      |      |      |     |  |  |  |  |
|            |        | GSSTFTGADVSK                                                                       |        | 2   | 99.9%  | 1  |    |            |            |            |            |            |           |           |           |           |      |      |      |      |      |      |      |      |       |      |      |     |      |      |      |     |  |  |  |  |
|            |        | HDLCLIK                                                                            |        | 2   | 99.9%  | 2  |    |            |            |            |            |            |           |           |           |           |      |      |      |      |      |      |      |      |       |      |      |     |      |      |      |     |  |  |  |  |
|            |        | IVDMTEAVR                                                                          |        | 2   | 99.9%  | 1  |    |            |            |            |            |            |           |           |           |           |      |      |      |      |      |      |      |      |       |      |      |     |      |      |      |     |  |  |  |  |
|            |        | IYGFYKQK                                                                           |        | 2   | 99.9%  | 1  |    |            |            |            |            |            |           |           |           |           |      |      |      |      |      |      |      |      |       |      |      |     |      |      |      |     |  |  |  |  |
|            |        | SREFLSPRLLEAPLK                                                                    |        | 3   | 98.3%  | 1  |    |            |            |            |            |            |           |           |           |           |      |      |      |      |      |      |      |      |       |      |      |     |      |      |      |     |  |  |  |  |
|            |        | TYFTDNCPLPIAAVDEK                                                                  |        | 2   | 100.0% | 1  |    |            |            |            |            |            |           |           |           |           |      |      |      |      |      |      |      |      |       |      |      |     |      |      |      |     |  |  |  |  |
| P00218253  | TGM2   | isoform 2 of Protein-glutamine gamma-glutamyltransferase 2                         | 100.0% | 1   | 1      | 1  | 2  | 285,713    | 282,827    | 361,386    | 270,489    | 33,574     | 42,969    | 33,550    | 22,807    | 26.3      | 36.6 | 20.8 | 18.9 | -1.1 | 0.7  | 1.3  | 0.1  | -1.1 | 0.7   | 1.4  | 0.1  | 1.0 | 0.9  | -1.3 | 0.06 |     |  |  |  |  |
| P00218252  | TGM2   | isoform 3 of Protein-glutamine gamma-glutamyltransferase 2                         | 100.0% | 1   | 1      | 1  | 2  | 285,713    | 282,827    | 361,386    | 270,489    | 33,574     | 42,969    | 33,550    | 22,807    | 26.3      | 36.6 | 20.8 | 18.9 | -1.1 | 0.7  | 1.3  | 0.1  | -1.1 | 0.7   | 1.4  | 0.1  | 1.0 | 0.9  | -1.3 | 0.06 |     |  |  |  |  |
|            |        | WNWNYGDVSPMSVGVSDVLR                                                               |        | 2   | 99.9%  | 1  | 1  | 4          | 599,415    | 564,948    | 585,380    | 700,750    | 118,452   | 23,541    | 97,883    | 58,281    | 44.2 | 9.3  | 22.1 | 18.6 | -1.1 | 0.8  | -1.0 | 0.9  | 1.2   | 0.5  | 1.0  | 0.8 | 1.2  | 0.06 | 1.2  | 0.2 |  |  |  |  |
| P00218292  | UFDL   | isoform Short of Ubiquitin ligation-degradation protein 1 homolog                  | 99.6%  | 1   | 1      | 1  | 4  | 599,415    | 564,948    | 585,380    | 700,750    | 118,452    | 23,541    | 97,883    | 58,281    | 44.2      | 9.3  | 22.1 | 18.6 | -1.1 | 0.8  | -1.0 | 0.9  | 1.2  | 0.5   | 1.0  | 0.8  | 1.2 | 0.06 | 1.2  | 0.2  |     |  |  |  |  |
| P00254779  | UFDL   | Uncharacterized protein                                                            | 99.6%  | 4   | 1      | 1  | 4  | 599,415    | 564,948    | 585,380    | 700,750    | 118,452    | 23,541    | 97,883    | 58,281    | 44.2      | 9.3  | 22.1 | 18.6 | -1.1 | 0.8  | -1.0 | 0.9  | 1.2  | 0.5   | 1.0  | 0.8  | 1.2 | 0.06 | 1.2  | 0.2  |     |  |  |  |  |
| P00255774  | UFDL   | isoform Long of Ubiquitin ligation-degradation protein 1 homolog                   | 99.6%  | 3   | 5      | 1  | 1  | 4          | 599,415    | 564,948    | 585,380    | 700,750    | 118,452   | 23,541    | 97,883    | 58,281    | 44.2 | 9.3  | 22.1 | 18.6 | -1.1 | 0.8  | -1.0 | 0.9  | 1.2   | 0.5  | 1.0  | 0.8 | 1.2  | 0.06 | 1.2  | 0.2 |  |  |  |  |
| P002013328 | UFDL   | Uncharacterized protein                                                            | 99.6%  | 3   | 5      | 1  | 1  | 4          | 599,415    | 564,948    | 585,380    | 700,750    | 118,452   | 23,541    | 97,883    | 58,281    | 44.2 | 9.3  | 22.1 | 18.6 | -1.1 | 0.8  | -1.0 | 0.9  | 1.2   | 0.5  | 1.0  | 0.8 | 1.2  | 0.06 | 1.2  | 0.2 |  |  |  |  |
| P00218319  | TPM3   | isoform 2 of Tropomyosin alpha-3 chain                                             | 100.0% | 10  | 11     | 15 | 1  | 51,417,759 | 48,522,406 | 46,276,776 | 53,911,790 | 3,325,611  | 2,664,932 | 2,219,224 | 1,496,895 | 14.5      | 12.3 | 10.7 | 6.2  | -1.1 | 0.5  | -1.1 | 0.2  | 1.0  | 0.5   | -1.0 | 0.5  | 1.1 | 0.1  | 1.2  | 0.02 |     |  |  |  |  |
|            |        | FVAFSGGSLR                                                                         |        | 2   | 99.9%  | 1  |    |            |            |            |            |            |           |           |           |           |      |      |      |      |      |      |      |      |       |      |      |     |      |      |      |     |  |  |  |  |
|            |        | 30_7                                                                               |        | 10  | 11     | 15 | 1  | 51,417,759 | 48,522,406 | 46,276,776 | 53,911,790 | 3,325,611  | 2,664,932 | 2,219,224 | 1,496,895 | 14.5      | 12.3 | 10.7 | 6.2  | -1.1 | 0.5  | -1.1 | 0.2  | 1.0  | 0.5   | -1.0 | 0.5  | 1.1 | 0.1  | 1.2  | 0.02 |     |  |  |  |  |
|            |        | AKDQSEIIEDEIK                                                                      |        | 3   | 100.0% | 1  |    |            |            |            |            |            |           |           |           |           |      |      |      |      |      |      |      |      |       |      |      |     |      |      |      |     |  |  |  |  |
|            |        | IQLVEEELDR                                                                         |        | 2   | 100.0% | 2  |    |            |            |            |            |            |           |           |           |           |      |      |      |      |      |      |      |      |       |      |      |     |      |      |      |     |  |  |  |  |
|            |        | IQVLQGDQDDAEER                                                                     |        | 2   | 100.0% | 2  |    |            |            |            |            |            |           |           |           |           |      |      |      |      |      |      |      |      |       |      |      |     |      |      |      |     |  |  |  |  |
|            |        | KDVAIQDQDDAEER                                                                     |        | 3   | 100.0% | 1  |    |            |            |            |            |            |           |           |           |           |      |      |      |      |      |      |      |      |       |      |      |     |      |      |      |     |  |  |  |  |
|            |        | LATALG                                                                             |        | 1   | 96.5%  | 2  |    |            |            |            |            |            |           |           |           |           |      |      |      |      |      |      |      |      |       |      |      |     |      |      |      |     |  |  |  |  |
|            |        | LMIDQNLK                                                                           |        | 2   | 91.3%  | 1  |    |            |            |            |            |            |           |           |           |           |      |      |      |      |      |      |      |      |       |      |      |     |      |      |      |     |  |  |  |  |
|            |        | LVNIEGDLR                                                                          |        | 2   | 92.0%  | 1  |    |            |            |            |            |            |           |           |           |           |      |      |      |      |      |      |      |      |       |      |      |     |      |      |      |     |  |  |  |  |
|            |        | MELGEIQL                                                                           |        | 2   | 86.0%  | 1  |    |            |            |            |            |            |           |           |           |           |      |      |      |      |      |      |      |      |       |      |      |     |      |      |      |     |  |  |  |  |
|            |        | RDLVLEEELDR                                                                        |        | 2   | 100.0% | 2  |    |            |            |            |            |            |           |           |           |           |      |      |      |      |      |      |      |      |       |      |      |     |      |      |      |     |  |  |  |  |
|            |        | TIDQLEELK                                                                          |        | 2   | 99.7%  | 1  |    |            |            |            |            |            |           |           |           |           |      |      |      |      |      |      |      |      |       |      |      |     |      |      |      |     |  |  |  |  |
|            |        | TIDQLEELK                                                                          |        | 3   | 86.7%  | 1  |    |            |            |            |            |            |           |           |           |           |      |      |      |      |      |      |      |      |       |      |      |     |      |      |      |     |  |  |  |  |
| P00218342  | MTHFD1 | C-1-tetrahydrofolate synthase, cytoplasmic                                         | 100.0% | 210 | 15     | 15 | 17 | 1          | 57,146,235 | 61,173,372 | 58,007,791 | 70,725,580 | 5,484,238 | 2,725,759 | 4,272,759 | 2,635,203 | 21.8 | 10.0 | 1    |      |      |      |      |      |       |      |      |     |      |      |      |     |  |  |  |  |









|           |        |                                                                                  |        |      |        |    |    |   |            |            |            |            |           |           |           |           |      |      |      |      |      |     |      |     |     |      |      |     |     |      |     |      |  |  |
|-----------|--------|----------------------------------------------------------------------------------|--------|------|--------|----|----|---|------------|------------|------------|------------|-----------|-----------|-----------|-----------|------|------|------|------|------|-----|------|-----|-----|------|------|-----|-----|------|-----|------|--|--|
| P00795181 | MAP2K2 | cDNA FL35806 fic, clone TEST2005987, highly similar to Dual specificity mitogen- | 100.0% | 7.3  | 1      | 2  | 2  | 3 | 610,455    | 592,349    | 631,862    | 661,033    | 45,805    | 23,022    | 32,099    | 19,777    | 16.8 | 8.7  | 11.4 | 6.7  | -1.0 | 0.7 | 1.0  | 0.7 | 1.1 | 0.3  | 1.1  | 0.3 | 1.1 | 0.05 | 1.0 | 0.5  |  |  |
|           |        | LCDFGVSGQLGSSMANSFVGR                                                            |        | 2    | 100.0% | 1  |    |   |            |            |            |            |           |           |           |           |      |      |      |      |      |     |      |     |     |      |      |     |     |      |     |      |  |  |
|           |        | LCDFGVSGQLGSSMANSFVGR                                                            |        | 2    | 99.6%  | 1  |    |   |            |            |            |            |           |           |           |           |      |      |      |      |      |     |      |     |     |      |      |     |     |      |     |      |  |  |
| P00219616 | PRPS1  | Ribose-phosphate pyrophosphokinase 1                                             | 99.4%  | 10.1 | 2      | 2  | 6  | 6 | 491,418    | 502,334    | 499,697    | 506,687    | 52,853    | 31,492    | 29,137    | 32,619    | 24.1 | 14.0 | 13.0 | 14.4 | 1.0  | 0.9 | 1.0  | 0.9 | 1.0 | 0.8  | -1.0 | 1   | 1.0 | 0.9  | 1.0 | 0.9  |  |  |
| P00252499 | PRPS1  | Ribose-phosphate pyrophosphokinase                                               | 99.4%  | 14.7 | 2      | 2  | 2  | 6 | 491,418    | 502,334    | 499,697    | 506,687    | 52,853    | 31,492    | 29,137    | 32,619    | 24.1 | 14.0 | 13.0 | 14.4 | 1.0  | 0.9 | 1.0  | 0.9 | 1.0 | 0.8  | -1.0 | 1   | 1.0 | 0.9  | 1.0 | 0.9  |  |  |
| P00219617 | PRPS2  | isoform 1 of Ribose-phosphate pyrophosphokinase 2                                | 99.4%  | 10.1 | 2      | 2  | 2  | 6 | 491,418    | 502,334    | 499,697    | 506,687    | 52,853    | 31,492    | 29,137    | 32,619    | 24.1 | 14.0 | 13.0 | 14.4 | 1.0  | 0.9 | 1.0  | 0.9 | 1.0 | 0.8  | -1.0 | 1   | 1.0 | 0.9  | 1.0 | 0.9  |  |  |
| P00219688 | PRPS2  | isoform 2 of Ribose-phosphate pyrophosphokinase 2                                | 99.4%  | 10.0 | 2      | 2  | 2  | 6 | 491,418    | 502,334    | 499,697    | 506,687    | 52,853    | 31,492    | 29,137    | 32,619    | 24.1 | 14.0 | 13.0 | 14.4 | 1.0  | 0.9 | 1.0  | 0.9 | 1.0 | 0.8  | -1.0 | 1   | 1.0 | 0.9  | 1.0 | 0.9  |  |  |
| P00204737 | PRPS2  | 19 kDa protein                                                                   | 99.4%  | 18.5 | 2      | 2  | 2  | 6 | 491,418    | 502,334    | 499,697    | 506,687    | 52,853    | 31,492    | 29,137    | 32,619    | 24.1 | 14.0 | 13.0 | 14.4 | 1.0  | 0.9 | 1.0  | 0.9 | 1.0 | 0.8  | -1.0 | 1   | 1.0 | 0.9  | 1.0 | 0.9  |  |  |
| P00204740 | PRPS2  | 16 kDa protein                                                                   | 99.4%  | 21.3 | 2      | 2  | 2  | 6 | 491,418    | 502,334    | 499,697    | 506,687    | 52,853    | 31,492    | 29,137    | 32,619    | 24.1 | 14.0 | 13.0 | 14.4 | 1.0  | 0.9 | 1.0  | 0.9 | 1.0 | 0.8  | -1.0 | 1   | 1.0 | 0.9  | 1.0 | 0.9  |  |  |
|           |        | KVYVSIKLAIEAR                                                                    |        | 2    | 99.4%  | 1  |    |   |            |            |            |            |           |           |           |           |      |      |      |      |      |     |      |     |     |      |      |     |     |      |     |      |  |  |
|           |        | VIYALTHGFSIPAISR                                                                 |        | 2    | 98.1%  | 1  |    |   |            |            |            |            |           |           |           |           |      |      |      |      |      |     |      |     |     |      |      |     |     |      |     |      |  |  |
| P00219622 | PSMA2  | Proteasome subunit alpha-type-2                                                  | 100.0% | 21.4 | 4      | 4  | 5  | 1 | 22,889,687 | 25,714,738 | 24,560,851 | 30,530,089 | 2,586,544 | 1,561,908 | 1,548,032 | 1,817,004 | 25.4 | 13.6 | 14.3 | 13.3 | 1.1  | 0.4 | 1.1  | 0.6 | 1.3 | 0.04 | -1.1 | 0.6 | 1.2 | 0.8  | 1.3 | 0.03 |  |  |
|           |        | AANGVYLAIEK                                                                      |        | 2    | 100.0% | 1  |    |   |            |            |            |            |           |           |           |           |      |      |      |      |      |     |      |     |     |      |      |     |     |      |     |      |  |  |
|           |        | GYSFSLTTFSPSSK                                                                   |        | 2    | 100.0% | 1  |    |   |            |            |            |            |           |           |           |           |      |      |      |      |      |     |      |     |     |      |      |     |     |      |     |      |  |  |
|           |        | LYQEVYLAIAVAGSAPFVYK                                                             |        | 2    | 99.9%  | 1  |    |   |            |            |            |            |           |           |           |           |      |      |      |      |      |     |      |     |     |      |      |     |     |      |     |      |  |  |
|           |        | LYQEVYLAIAVAGSAPFVYK                                                             |        | 3    | 100.0% | 1  |    |   |            |            |            |            |           |           |           |           |      |      |      |      |      |     |      |     |     |      |      |     |     |      |     |      |  |  |
|           |        | NYDELELDIAHFAILTK                                                                |        | 3    | 99.5%  | 1  |    |   |            |            |            |            |           |           |           |           |      |      |      |      |      |     |      |     |     |      |      |     |     |      |     |      |  |  |
| P00219671 | GSTK1  | isoform 1 of Glutathione S-transferase kappa 1                                   | 100.0% | 23.3 | 4      | 4  | 5  | 1 | 21,116,590 | 23,550,105 | 22,605,780 | 26,489,705 | 1,756,102 | 869,242   | 1,828,505 | 580,090   | 18.8 | 8.3  | 18.1 | 4.9  | 1.1  | 0.2 | 1.1  | 0.6 | 1.3 | 0.03 | -1.0 | 0.7 | 1.1 | 0.02 | 1.2 | 0.1  |  |  |
|           |        | AGMSAEQAGLLEK                                                                    |        | 2    | 100.0% | 1  |    |   |            |            |            |            |           |           |           |           |      |      |      |      |      |     |      |     |     |      |      |     |     |      |     |      |  |  |
|           |        | KGLYMANLTK                                                                       |        | 2    | 98.1%  | 1  |    |   |            |            |            |            |           |           |           |           |      |      |      |      |      |     |      |     |     |      |      |     |     |      |     |      |  |  |
|           |        | MELLANLLEK                                                                       |        | 2    | 99.6%  | 1  |    |   |            |            |            |            |           |           |           |           |      |      |      |      |      |     |      |     |     |      |      |     |     |      |     |      |  |  |
|           |        | NETDEPISLAALAK                                                                   |        | 2    | 100.0% | 2  |    |   |            |            |            |            |           |           |           |           |      |      |      |      |      |     |      |     |     |      |      |     |     |      |     |      |  |  |
| P00219678 | EIF251 | Eukaryotic translation initiation factor 2 subunit 1                             | 100.0% | 30.8 | 7      | 7  | 8  | 1 | 42,532,084 | 43,074,712 | 43,387,102 | 49,202,500 | 2,810,227 | 1,868,117 | 2,229,691 | 1,829,066 | 14.8 | 9.7  | 11.5 | 8.3  | 1.0  | 0.9 | 1.0  | 0.8 | 1.2 | 0.08 | 1.0  | 0.9 | 1.1 | 0.05 | 1.1 | 0.08 |  |  |
|           |        | FPEVYDMMINR                                                                      |        | 2    | 98.3%  | 1  |    |   |            |            |            |            |           |           |           |           |      |      |      |      |      |     |      |     |     |      |      |     |     |      |     |      |  |  |
|           |        | GIVNVMPEK                                                                        |        | 2    | 95.4%  | 1  |    |   |            |            |            |            |           |           |           |           |      |      |      |      |      |     |      |     |     |      |      |     |     |      |     |      |  |  |
|           |        | HAVSDPDLSDLDNEDER                                                                |        | 3    | 96.6%  | 1  |    |   |            |            |            |            |           |           |           |           |      |      |      |      |      |     |      |     |     |      |      |     |     |      |     |      |  |  |
|           |        | HVAELLYTKDGLLELFOR                                                               |        | 3    | 100.0% | 1  |    |   |            |            |            |            |           |           |           |           |      |      |      |      |      |     |      |     |     |      |      |     |     |      |     |      |  |  |
|           |        | INLAPPP                                                                          |        | 2    | 99.3%  | 1  |    |   |            |            |            |            |           |           |           |           |      |      |      |      |      |     |      |     |     |      |      |     |     |      |     |      |  |  |
|           |        | TEGLVLSQAMVVK                                                                    |        | 2    | 100.0% | 1  |    |   |            |            |            |            |           |           |           |           |      |      |      |      |      |     |      |     |     |      |      |     |     |      |     |      |  |  |
|           |        | VYVYDTELEAK                                                                      |        | 2    | 100.0% | 2  |    |   |            |            |            |            |           |           |           |           |      |      |      |      |      |     |      |     |     |      |      |     |     |      |     |      |  |  |
| P00219740 | MCM7   | isoform 2 of DNA replication licensing factor MCM7                               | 98.9%  | 3.6  | 1      | 1  | 1  | 2 | 1,623,785  | 1,561,260  | 1,517,130  | 1,804,820  | 180,825   | 98,416    | 133,032   | 121,826   | 24.9 | 14.1 | 19.6 | 15.1 | -1.0 | 0.8 | -1.1 | 0.6 | 1.1 | 0.4  | -1.0 | 0.8 | 1.2 | 0.2  | 1.2 | 0.1  |  |  |
| P00229904 | MCM7   | isoform 1 of DNA replication licensing factor MCM7                               | 98.9%  | 3.0  | 1      | 1  | 1  | 2 | 1,623,785  | 1,561,260  | 1,517,130  | 1,804,820  | 180,825   | 98,416    | 133,032   | 121,826   | 24.9 | 14.1 | 19.6 | 15.1 | -1.0 | 0.8 | -1.1 | 0.6 | 1.1 | 0.4  | -1.0 | 0.8 | 1.2 | 0.2  | 1.2 | 0.1  |  |  |
|           |        | LFADAVDELPOYK                                                                    |        | 2    | 98.2%  | 1  |    |   |            |            |            |            |           |           |           |           |      |      |      |      |      |     |      |     |     |      |      |     |     |      |     |      |  |  |
| P00219743 | CTNND1 | isoform 4B/C of Catenin delta-1                                                  | 100.0% | 17.7 | 9      | 10 | 11 | 4 | 1,481,327  | 1,588,995  | 1,485,042  | 1,733,078  | 199,583   | 63,067    | 148,161   | 37,028    | 16.5 | 8.9  | 22.3 | 4.8  | 1.1  | 0.4 | 1.0  | 1   | 1.2 | 0.08 | -1.1 | 0.5 | 1.1 | 0.08 | 1.2 | 0.2  |  |  |
| P00219744 | CTNND1 | isoform 4B of Catenin delta-1                                                    | 100.0% | 17.8 | 9      | 10 | 11 | 4 | 1,481,327  | 1,588,995  | 1,485,042  | 1,733,078  | 199,583   | 63,067    | 148,161   | 37,028    | 16.5 | 8.9  | 22.3 | 4.8  | 1.1  | 0.4 | 1.0  | 1   | 1.2 | 0.08 | -1.1 | 0.5 | 1.1 | 0.08 | 1.2 | 0.2  |  |  |
| P00219745 | CTNND1 | isoform 4C of Catenin delta-1                                                    | 100.0% | 17.3 | 9      | 10 | 11 | 4 | 1,481,327  | 1,588,995  | 1,485,042  | 1,733,078  | 199,583   | 63,067    | 148,161   | 37,028    | 16.5 | 8.9  | 22.3 | 4.8  | 1.1  | 0.4 | 1.0  | 1   | 1.2 | 0.08 | -1.1 | 0.5 | 1.1 | 0.08 | 1.2 | 0.2  |  |  |
| P00219746 | CTNND1 | isoform 4 of Catenin delta-1                                                     | 100.0% | 16.5 | 9      | 10 | 11 | 4 | 1,481,327  | 1,588,995  | 1,485,042  | 1,733,078  | 199,583   | 63,067    | 148,161   | 37,028    | 16.5 | 8.9  | 22.3 | 4.8  | 1.1  | 0.4 | 1.0  | 1   | 1.2 | 0.08 | -1.1 | 0.5 | 1.1 | 0.08 | 1.2 | 0.2  |  |  |
| P00219747 | CTNND1 | isoform 4A of Catenin delta-1                                                    | 100.0% | 16.7 | 9      | 10 | 11 | 4 | 1,481,327  | 1,588,995  | 1,485,042  | 1,733,078  | 199,583   | 63,067    | 148,161   | 37,028    | 16.5 | 8.9  | 22.3 | 4.8  | 1.1  | 0.4 | 1.0  | 1   | 1.2 | 0.08 | -1.1 | 0.5 | 1.1 | 0.08 | 1.2 | 0.2  |  |  |
|           |        | KAALLVQTIWYK                                                                     |        | 2    | 100.0% | 2  |    |   |            |            |            |            |           |           |           |           |      |      |      |      |      |     |      |     |     |      |      |     |     |      |     |      |  |  |
|           |        | QYELFQPEYVK                                                                      |        | 2    | 100.0% | 1  |    |   |            |            |            |            |           |           |           |           |      |      |      |      |      |     |      |     |     |      |      |     |     |      |     |      |  |  |
|           |        | HAPNLVK                                                                          |        | 2    | 100.0% | 1  |    |   |            |            |            |            |           |           |           |           |      |      |      |      |      |     |      |     |     |      |      |     |     |      |     |      |  |  |
|           |        | HLAVLDR                                                                          |        | 1    | 83.0%  | 1  |    |   |            |            |            |            |           |           |           |           |      |      |      |      |      |     |      |     |     |      |      |     |     |      |     |      |  |  |
|           |        | QPELPEVIMLGFRR                                                                   |        | 2    | 99.9%  | 1  |    |   |            |            |            |            |           |           |           |           |      |      |      |      |      |     |      |     |     |      |      |     |     |      |     |      |  |  |
|           |        | SDFQVNLNNSAR                                                                     |        | 2    | 99.9%  | 1  |    |   |            |            |            |            |           |           |           |           |      |      |      |      |      |     |      |     |     |      |      |     |     |      |     |      |  |  |
|           |        | SLDNNYSIPNKR                                                                     |        | 2    | 99.7%  | 1  |    |   |            |            |            |            |           |           |           |           |      |      |      |      |      |     |      |     |     |      |      |     |     |      |     |      |  |  |
|           |        | SSQSHSYDSTLPLDR                                                                  |        | 2    | 94.6%  | 1  |    |   |            |            |            |            |           |           |           |           |      |      |      |      |      |     |      |     |     |      |      |     |     |      |     |      |  |  |
|           |        | SSQSHSYDSTLPLDR                                                                  |        | 3    | 99.4%  | 1  |    |   |            |            |            |            |           |           |           |           |      |      |      |      |      |     |      |     |     |      |      |     |     |      |     |      |  |  |
|           |        | TPAALESAGAQNLGAGR                                                                |        | 3    | 98.3%  | 1  |    |   |            |            |            |            |           |           |           |           |      |      |      |      |      |     |      |     |     |      |      |     |     |      |     |      |  |  |
| P00219748 | CTNND1 | isoform 4B/C of Catenin delta-1                                                  | 100.0% | 16.3 | 8      | 9  | 10 | 5 | 1,335,466  | 1,400,758  | 1,327,457  | 1,535,403  | 100,154   | 62,992    | 139,929   | 42,685    | 16.8 | 10.1 | 23.6 | 6.2  | 1.0  | 0.6 | -1.0 | 1.1 | 1.1 | 0.1  | -1.1 | 0.6 |     |      |     |      |  |  |

|            |      |                                                                                       |        |        |    |    |   |           |           |           |           |           |         |         |         |         |      |      |      |      |      |      |      |     |     |      |      |     |      |      |     |     |  |
|------------|------|---------------------------------------------------------------------------------------|--------|--------|----|----|---|-----------|-----------|-----------|-----------|-----------|---------|---------|---------|---------|------|------|------|------|------|------|------|-----|-----|------|------|-----|------|------|-----|-----|--|
| P0021973   | EY44 | isoform 2 of Eyes absent homolog 4                                                    | 99.8%  | 1.8    | 1  | 1  | 1 | 8         | 587.393   | 577.703   | 567.116   | 662.994   | 60.318  | 37.777  | 53.748  | 29.537  | 23.0 | 14.6 | 21.2 | 10.0 | -1.0 | 0.9  | -1.0 | 0.8 | 1.1 | 0.3  | -1.0 | 0.9 | 1.1  | 0.1  | 1.2 | 0.2 |  |
| P00200778  | EY44 | cDNA FL6181, highly similar to Eyes absent homolog 4                                  | 99.8%  | 1.7    | 1  | 1  | 1 | 8         | 587.393   | 577.703   | 567.116   | 662.994   | 60.318  | 37.777  | 53.748  | 29.537  | 23.0 | 14.6 | 21.2 | 10.0 | -1.0 | 0.9  | -1.0 | 0.8 | 1.1 | 0.3  | -1.0 | 0.9 | 1.1  | 0.1  | 1.2 | 0.2 |  |
| P00207184  | EY44 | isoform 1 of Eyes absent homolog 4                                                    | 99.8%  | 1.7    | 1  | 1  | 1 | 8         | 587.393   | 577.703   | 567.116   | 662.994   | 60.318  | 37.777  | 53.748  | 29.537  | 23.0 | 14.6 | 21.2 | 10.0 | -1.0 | 0.9  | -1.0 | 0.8 | 1.1 | 0.3  | -1.0 | 0.9 | 1.1  | 0.1  | 1.2 | 0.2 |  |
| P00209821  | EY44 | cDNA FL35557, highly similar to Eyes absent homolog 4                                 | 99.8%  | 1.9    | 1  | 1  | 1 | 8         | 587.393   | 577.703   | 567.116   | 662.994   | 60.318  | 37.777  | 53.748  | 29.537  | 23.0 | 14.6 | 21.2 | 10.0 | -1.0 | 0.9  | -1.0 | 0.8 | 1.1 | 0.3  | -1.0 | 0.9 | 1.1  | 0.1  | 1.2 | 0.2 |  |
| P002074164 | EY44 | cDNA FL61280, highly similar to Eyes absent homolog 4                                 | 99.8%  | 1.9    | 1  | 1  | 1 | 8         | 587.393   | 577.703   | 567.116   | 662.994   | 60.318  | 37.777  | 53.748  | 29.537  | 23.0 | 14.6 | 21.2 | 10.0 | -1.0 | 0.9  | -1.0 | 0.8 | 1.1 | 0.3  | -1.0 | 0.9 | 1.1  | 0.1  | 1.2 | 0.2 |  |
| P002060315 | EY44 | Uncharacterized protein                                                               | 99.8%  | 1.9    | 1  | 1  | 1 | 8         | 587.393   | 577.703   | 567.116   | 662.994   | 60.318  | 37.777  | 53.748  | 29.537  | 23.0 | 14.6 | 21.2 | 10.0 | -1.0 | 0.9  | -1.0 | 0.8 | 1.1 | 0.3  | -1.0 | 0.9 | 1.1  | 0.1  | 1.2 | 0.2 |  |
| P002060204 | EY44 | isoform 1 of Eyes absent homolog 4                                                    | 99.8%  | 1.7    | 1  | 1  | 1 | 8         | 587.393   | 577.703   | 567.116   | 662.994   | 60.318  | 37.777  | 53.748  | 29.537  | 23.0 | 14.6 | 21.2 | 10.0 | -1.0 | 0.9  | -1.0 | 0.8 | 1.1 | 0.3  | -1.0 | 0.9 | 1.1  | 0.1  | 1.2 | 0.2 |  |
| P00220014  | ID1  | isoform 2 of Isopentenyl-diphosphate Delta-isomerase 1                                | 100.0% | 37.4   | 6  | 6  | 7 | 2         | 8,065,558 | 8,172,833 | 8,673,595 | 9,258,635 | 614,853 | 256,631 | 469,525 | 390,190 | 17.1 | 7.0  | 12.1 | 9.4  | 1.0  | 0.9  | 1.1  | 0.5 | 1.1 | 0.1  | 1.1  | 0.4 | 1.1  | 0.05 | 1.1 | 0.4 |  |
| P002454307 | ID1  | isoform 1 of Isopentenyl-diphosphate Delta-isomerase 1                                | 100.0% | 37.4   | 6  | 6  | 7 | 2         | 8,065,558 | 8,172,833 | 8,673,595 | 9,258,635 | 614,853 | 256,631 | 469,525 | 390,190 | 17.1 | 7.0  | 12.1 | 9.4  | 1.0  | 0.9  | 1.1  | 0.5 | 1.1 | 0.1  | 1.1  | 0.4 | 1.1  | 0.05 | 1.1 | 0.4 |  |
|            |      | AEIIGFLEPPEEENLYLR                                                                    | 2      | 100.0% | 1  |    |   |           |           |           |           |           |         |         |         |         |      |      |      |      |      |      |      |     |     |      |      |     |      |      |     |     |  |
|            |      | QSSDGVGHEHYLLLR                                                                       | 3      | 100.0% | 1  |    |   |           |           |           |           |           |         |         |         |         |      |      |      |      |      |      |      |     |     |      |      |     |      |      |     |     |  |
|            |      | ITFGGCTNTCCSHPNLSPAEELSDALGVR                                                         | 3      | 100.0% | 1  |    |   |           |           |           |           |           |         |         |         |         |      |      |      |      |      |      |      |     |     |      |      |     |      |      |     |     |  |
|            |      | NVTLNLPDRNEK                                                                          | 2      | 92.8%  | 1  |    |   |           |           |           |           |           |         |         |         |         |      |      |      |      |      |      |      |     |     |      |      |     |      |      |     |     |  |
|            |      | LKAEIQLPEEVPPEEINLYLR                                                                 | 3      | 84.7%  | 1  |    |   |           |           |           |           |           |         |         |         |         |      |      |      |      |      |      |      |     |     |      |      |     |      |      |     |     |  |
|            |      | NVTLNLPDRNEK                                                                          | 2      | 100.0% | 2  |    |   |           |           |           |           |           |         |         |         |         |      |      |      |      |      |      |      |     |     |      |      |     |      |      |     |     |  |
| P00220038  | PKN  | isoform Alpha of Paxillin                                                             | 90.2%  | 2      | 1  | 1  | 7 | 1,010,483 | 1,055,850 | 1,354,856 | 1,106,377 | 96,213    | 153,055 | 114,587 | 48,726  | 21.3    | 32.4 | 18.9 | 9.9  | 1.0  | 0.8  | 1.3  | 0.05 | 1.1 | 0.4 | 1.3  | 0.2  | 1.0 | 0.8  | -1.2 | 0.8 |     |  |
| P00220031  | PKN  | isoform Gamma of Paxillin                                                             | 90.2%  | 2.2    | 1  | 1  | 7 | 1,010,483 | 1,055,850 | 1,354,856 | 1,106,377 | 96,213    | 153,055 | 114,587 | 48,726  | 21.3    | 32.4 | 18.9 | 9.9  | 1.0  | 0.8  | 1.3  | 0.05 | 1.1 | 0.4 | 1.3  | 0.2  | 1.0 | 0.8  | -1.2 | 0.8 |     |  |
| P002035634 | PKN  | isoform Beta of Paxillin                                                              | 90.2%  | 2.2    | 1  | 1  | 7 | 1,010,483 | 1,055,850 | 1,354,856 | 1,106,377 | 96,213    | 153,055 | 114,587 | 48,726  | 21.3    | 32.4 | 18.9 | 9.9  | 1.0  | 0.8  | 1.3  | 0.05 | 1.1 | 0.4 | 1.3  | 0.2  | 1.0 | 0.8  | -1.2 | 0.8 |     |  |
| P002055917 | PKN  | Paxillin variant (fragments)                                                          | 90.2%  | 1.8    | 1  | 1  | 7 | 1,010,483 | 1,055,850 | 1,354,856 | 1,106,377 | 96,213    | 153,055 | 114,587 | 48,726  | 21.3    | 32.4 | 18.9 | 9.9  | 1.0  | 0.8  | 1.3  | 0.05 | 1.1 | 0.4 | 1.3  | 0.2  | 1.0 | 0.8  | -1.2 | 0.8 |     |  |
| P002090573 | PKN  | isoform 4 of Paxillin                                                                 | 90.2%  | 3.1    | 1  | 1  | 7 | 1,010,483 | 1,055,850 | 1,354,856 | 1,106,377 | 96,213    | 153,055 | 114,587 | 48,726  | 21.3    | 32.4 | 18.9 | 9.9  | 1.0  | 0.8  | 1.3  | 0.05 | 1.1 | 0.4 | 1.3  | 0.2  | 1.0 | 0.8  | -1.2 | 0.8 |     |  |
| P010191327 | PKN  | 35 kDa protein                                                                        | 90.2%  | 4.2    | 1  | 1  | 7 | 1,010,483 | 1,055,850 | 1,354,856 | 1,106,377 | 96,213    | 153,055 | 114,587 | 48,726  | 21.3    | 32.4 | 18.9 | 9.9  | 1.0  | 0.8  | 1.3  | 0.05 | 1.1 | 0.4 | 1.3  | 0.2  | 1.0 | 0.8  | -1.2 | 0.8 |     |  |
| P010191525 | PKN  | cDNA FL11691, iso. clone TRACH000892, highly similar to Paxillin                      | 90.2%  | 4.2    | 1  | 1  | 7 | 1,010,483 | 1,055,850 | 1,354,856 | 1,106,377 | 96,213    | 153,055 | 114,587 | 48,726  | 21.3    | 32.4 | 18.9 | 9.9  | 1.0  | 0.8  | 1.3  | 0.05 | 1.1 | 0.4 | 1.3  | 0.2  | 1.0 | 0.8  | -1.2 | 0.8 |     |  |
| P002200238 | SRRT | isoform 2 of Serrate RNA effector molecule homolog                                    | 100.0% | 6.7    | 4  | 4  | 6 | 2,710,468 | 2,820,437 | 2,691,897 | 3,001,616 | 246,806   | 151,430 | 121,435 | 163,448 | 20.4    | 12.0 | 10.1 | 12.2 | 1.0  | 0.7  | -1.0 | 0.9  | 1.1 | 0.4 | -1.0 | 0.5  | 1.1 | 0.4  | 1.1  | 0.2 |     |  |
| P00231544  | SRRT | isoform 1 of Serrate RNA effector molecule homolog                                    | 100.0% | 6.6    | 4  | 4  | 6 | 2,710,468 | 2,820,437 | 2,691,897 | 3,001,616 | 246,806   | 151,430 | 121,435 | 163,448 | 20.4    | 12.0 | 10.1 | 12.2 | 1.0  | 0.7  | -1.0 | 0.9  | 1.1 | 0.4 | -1.0 | 0.5  | 1.1 | 0.4  | 1.1  | 0.2 |     |  |
| P002085025 | SRRT | isoform 4 of Serrate RNA effector molecule homolog                                    | 100.0% | 6.7    | 4  | 4  | 6 | 2,710,468 | 2,820,437 | 2,691,897 | 3,001,616 | 246,806   | 151,430 | 121,435 | 163,448 | 20.4    | 12.0 | 10.1 | 12.2 | 1.0  | 0.7  | -1.0 | 0.9  | 1.1 | 0.4 | -1.0 | 0.5  | 1.1 | 0.4  | 1.1  | 0.2 |     |  |
| P002088513 | SRRT | isoform 3 of Serrate RNA effector molecule homolog                                    | 100.0% | 6.6    | 4  | 4  | 6 | 2,710,468 | 2,820,437 | 2,691,897 | 3,001,616 | 246,806   | 151,430 | 121,435 | 163,448 | 20.4    | 12.0 | 10.1 | 12.2 | 1.0  | 0.7  | -1.0 | 0.9  | 1.1 | 0.4 | -1.0 | 0.5  | 1.1 | 0.4  | 1.1  | 0.2 |     |  |
| P002276820 | SRRT | isoform 1 of Serrate RNA effector molecule homolog                                    | 100.0% | 6.6    | 4  | 4  | 6 | 2,710,468 | 2,820,437 | 2,691,897 | 3,001,616 | 246,806   | 151,430 | 121,435 | 163,448 | 20.4    | 12.0 | 10.1 | 12.2 | 1.0  | 0.7  | -1.0 | 0.9  | 1.1 | 0.4 | -1.0 | 0.5  | 1.1 | 0.4  | 1.1  | 0.2 |     |  |
| P00205633  | SRRT | 57 kDa protein                                                                        | 100.0% | 11.6   | 4  | 4  | 6 | 2,710,468 | 2,820,437 | 2,691,897 | 3,001,616 | 246,806   | 151,430 | 121,435 | 163,448 | 20.4    | 12.0 | 10.1 | 12.2 | 1.0  | 0.7  | -1.0 | 0.9  | 1.1 | 0.4 | -1.0 | 0.5  | 1.1 | 0.4  | 1.1  | 0.2 |     |  |
|            |      | ELDLMASLDFDK                                                                          | 2      | 85.1%  | 1  |    |   |           |           |           |           |           |         |         |         |         |      |      |      |      |      |      |      |     |     |      |      |     |      |      |     |     |  |
|            |      | ECELSPGWNR                                                                            | 2      | 84.9%  | 1  |    |   |           |           |           |           |           |         |         |         |         |      |      |      |      |      |      |      |     |     |      |      |     |      |      |     |     |  |
|            |      | EVAERERIDAK                                                                           | 2      | 100.0% | 1  |    |   |           |           |           |           |           |         |         |         |         |      |      |      |      |      |      |      |     |     |      |      |     |      |      |     |     |  |
|            |      | PVTSNTGLGDKK                                                                          | 2      | 99.2%  | 1  |    |   |           |           |           |           |           |         |         |         |         |      |      |      |      |      |      |      |     |     |      |      |     |      |      |     |     |  |
|            |      | IWHSDDYNTICEYVPEDEMPNR                                                                | 3      | 99.3%  | 1  |    |   |           |           |           |           |           |         |         |         |         |      |      |      |      |      |      |      |     |     |      |      |     |      |      |     |     |  |
| P00220096  | STX3 | isoform B of Syntaxin-3                                                               | 98.7%  | 3.1    | 1  | 1  | 5 | 862,942   | 813,032   | 868,636   | 911,204   | 65,306    | 28,357  | 28,224  | 31,418  | 16.9    | 7.8  | 7.3  | 7.7  | -1.1 | 0.5  | 1.0  | 0.9  | 1.1 | 0.5 | 1.1  | 0.2  | 1.1 | 0.05 | 1.0  | 0.3 |     |  |
| P002035768 | STX3 | isoform A of Syntaxin-3                                                               | 98.7%  | 3.1    | 1  | 1  | 5 | 862,942   | 813,032   | 868,636   | 911,204   | 65,306    | 28,357  | 28,224  | 31,418  | 16.9    | 7.8  | 7.3  | 7.7  | -1.1 | 0.5  | 1.0  | 0.9  | 1.1 | 0.5 | 1.1  | 0.2  | 1.1 | 0.05 | 1.0  | 0.3 |     |  |
| P002090833 | STX3 | cDNA FLJ22523, highly similar to Mus musculus syntaxin 3 (Stx3), transcript variant 1 | 98.7%  | 5.0    | 1  | 1  | 5 | 862,942   | 813,032   | 868,636   | 911,204   | 65,306    | 28,357  | 28,224  | 31,418  | 16.9    | 7.8  | 7.3  | 7.7  | -1.1 | 0.5  | 1.0  | 0.9  | 1.1 | 0.5 | 1.1  | 0.2  | 1.1 | 0.05 | 1.0  | 0.3 |     |  |
| P002064817 | STX3 | Syntaxin 3 isoform 2                                                                  | 98.7%  | 3.3    | 1  | 1  | 5 | 862,942   | 813,032   | 868,636   | 911,204   | 65,306    | 28,357  | 28,224  | 31,418  | 16.9    | 7.8  | 7.3  | 7.7  | -1.1 | 0.5  | 1.0  | 0.9  | 1.1 | 0.5 | 1.1  | 0.2  | 1.1 | 0.05 | 1.0  | 0.3 |     |  |
| P002062274 | STX3 | Uncharacterized protein                                                               | 98.7%  | 3.5    | 1  | 1  | 5 | 862,942   | 813,032   | 868,636   | 911,204   | 65,306    | 28,357  | 28,224  | 31,418  | 16.9    | 7.8  | 7.3  | 7.7  | -1.1 | 0.5  | 1.0  | 0.9  | 1.1 | 0.5 | 1.1  | 0.2  | 1.1 | 0.05 | 1.0  | 0.3 |     |  |
| P002202113 | MAP4 | isoform 2 of Microtubule-associated protein 4                                         | 100.0% | 13     | 11 | 14 | 1 | 7,666,591 | 7,864,648 | 7,697,423 | 8,712,366 | 774,718   | 246,633 | 414,828 | 394,978 | 22.6    | 7.0  | 12.1 | 10.1 | 10.1 | 0.8  | 1.0  | 1.1  | 1.1 | 0.3 | -1.0 | 0.7  | 1.1 | 0.1  | 1.1  | 0.1 |     |  |
|            |      | YNEAGVDNR                                                                             | 2      | 98.7%  | 1  |    |   |           |           |           |           |           |         |         |         |         |      |      |      |      |      |      |      |     |     |      |      |     |      |      |     |     |  |
|            |      | DPHATLEAFDDVVGTVGK                                                                    | 2      | 100.0% | 2  |    |   |           |           |           |           |           |         |         |         |         |      |      |      |      |      |      |      |     |     |      |      |     |      |      |     |     |  |
|            |      | DPHATLEAFDDVVGTVGK                                                                    | 3      | 100.0% | 1  |    |   |           |           |           |           |           |         |         |         |         |      |      |      |      |      |      |      |     |     |      |      |     |      |      |     |     |  |
|            |      | DPQPSFDMALYK                                                                          | 2      | 99.5%  | 1  |    |   |           |           |           |           |           |         |         |         |         |      |      |      |      |      |      |      |     |     |      |      |     |      |      |     |     |  |













|           |        |                                                                     |        |                           |    |        |    |   |            |            |            |            |           |           |           |           |      |      |      |      |      |     |      |     |      |     |      |      |     |      |      |      |     |     |  |  |  |
|-----------|--------|---------------------------------------------------------------------|--------|---------------------------|----|--------|----|---|------------|------------|------------|------------|-----------|-----------|-----------|-----------|------|------|------|------|------|-----|------|-----|------|-----|------|------|-----|------|------|------|-----|-----|--|--|--|
| P00290652 | RSF1   | isoform 1 of Remodeling and spacing factor 1                        | 96.5%  | 1.8                       | 1  | 1      | 1  | 4 | 810.868    | 869.670    | 758.190    | 873.408    | 119.488   | 120.964   | 61.723    | 58.850    | 33.0 | 31.1 | 18.2 | 15.1 | 1.1  | 0.7 | -1.1 | 0.7 | 1.1  | 0.7 | -1.1 | 0.4  | 1.0 | 1    | 1.2  | 0.2  |     |     |  |  |  |
| P0051441  | RSF1   | isoform 2 of Remodeling and spacing factor 1                        | 96.5%  | 1.8                       | 1  | 1      | 1  | 4 | 810.868    | 869.670    | 758.190    | 873.408    | 119.488   | 120.964   | 61.723    | 58.850    | 33.0 | 31.1 | 18.2 | 15.1 | 1.1  | 0.7 | -1.1 | 0.7 | 1.1  | 0.7 | -1.1 | 0.4  | 1.0 | 1    | 1.2  | 0.2  |     |     |  |  |  |
| P0007790  | RSF1   | 32 kDa protein                                                      | 96.5%  | 2.2                       | 1  | 1      | 1  | 4 | 810.868    | 869.670    | 758.190    | 873.408    | 119.488   | 120.964   | 61.723    | 58.850    | 33.0 | 31.1 | 18.2 | 15.1 | 1.1  | 0.7 | -1.1 | 0.7 | 1.1  | 0.7 | -1.1 | 0.4  | 1.0 | 1    | 1.2  | 0.2  |     |     |  |  |  |
| P00262445 | RSF1   | isoform 3 of Remodeling and spacing factor 1                        | 96.5%  | 2.2                       | 1  | 1      | 1  | 4 | 810.868    | 869.670    | 758.190    | 873.408    | 119.488   | 120.964   | 61.723    | 58.850    | 33.0 | 31.1 | 18.2 | 15.1 | 1.1  | 0.7 | -1.1 | 0.7 | 1.1  | 0.7 | -1.1 | 0.4  | 1.0 | 1    | 1.2  | 0.2  |     |     |  |  |  |
| P00290684 | PNKP   | Bifunctional polynucleotide phosphatase/kinase                      | 93.4%  |                           |    |        |    |   |            |            |            |            |           |           |           |           |      |      |      |      |      |     |      |     |      |     |      |      |     |      |      |      |     |     |  |  |  |
| P00291006 | MHD2   | Matein dehydrogenase, mitochondrial                                 | 100.0% |                           |    |        |    |   |            |            |            |            |           |           |           |           |      |      |      |      |      |     |      |     |      |     |      |      |     |      |      |      |     |     |  |  |  |
|           |        |                                                                     |        | 53.0                      | 14 | 16     | 25 | 1 | 69.098.066 | 70.477.167 | 67.321.780 | 74.370.927 | 6.168.653 | 1.474.468 | 4.031.632 | 2.204.559 | 20.0 | 4.7  | 13.4 | 6.6  | 1.0  | 0.8 | -1.0 | 0.8 | 1.1  | 0.5 | -1.0 | 0.5  | 1.1 | 0.2  | 1.1  | 0.2  |     |     |  |  |  |
|           |        |                                                                     |        | AMITMELK                  | 2  | 100.0% | 2  |   |            |            |            |            |           |           |           |           |      |      |      |      |      |     |      |     |      |     |      |      |     |      |      |      |     |     |  |  |  |
|           |        |                                                                     |        | EGVYECSPVK                | 2  | 100.0% | 2  |   |            |            |            |            |           |           |           |           |      |      |      |      |      |     |      |     |      |     |      |      |     |      |      |      |     |     |  |  |  |
|           |        |                                                                     |        | GCDVWVPAQVPR              | 2  | 100.0% | 2  |   |            |            |            |            |           |           |           |           |      |      |      |      |      |     |      |     |      |     |      |      |     |      |      |      |     |     |  |  |  |
|           |        |                                                                     |        | GYLGGPGLCK                | 2  | 100.0% | 2  |   |            |            |            |            |           |           |           |           |      |      |      |      |      |     |      |     |      |     |      |      |     |      |      |      |     |     |  |  |  |
|           |        |                                                                     |        | FSVYTLDIR                 | 2  | 100.0% | 2  |   |            |            |            |            |           |           |           |           |      |      |      |      |      |     |      |     |      |     |      |      |     |      |      |      |     |     |  |  |  |
|           |        |                                                                     |        | IEFAGTEYVK                | 2  | 100.0% | 2  |   |            |            |            |            |           |           |           |           |      |      |      |      |      |     |      |     |      |     |      |      |     |      |      |      |     |     |  |  |  |
|           |        |                                                                     |        | LTLVDAHTFDVADLSMETK       | 3  | 100.0% | 1  |   |            |            |            |            |           |           |           |           |      |      |      |      |      |     |      |     |      |     |      |      |     |      |      |      |     |     |  |  |  |
|           |        |                                                                     |        | MSDAPELK                  | 2  | 99.8%  | 1  |   |            |            |            |            |           |           |           |           |      |      |      |      |      |     |      |     |      |     |      |      |     |      |      |      |     |     |  |  |  |
|           |        |                                                                     |        | NSPLVSR                   | 1  | 98.4%  | 1  |   |            |            |            |            |           |           |           |           |      |      |      |      |      |     |      |     |      |     |      |      |     |      |      |      |     |     |  |  |  |
|           |        |                                                                     |        | SOETEDYVSTPLLGG           | 2  | 100.0% | 1  |   |            |            |            |            |           |           |           |           |      |      |      |      |      |     |      |     |      |     |      |      |     |      |      |      |     |     |  |  |  |
|           |        |                                                                     |        | TRPUSQCTPK                | 2  | 100.0% | 2  |   |            |            |            |            |           |           |           |           |      |      |      |      |      |     |      |     |      |     |      |      |     |      |      |      |     |     |  |  |  |
|           |        |                                                                     |        | VAVLAGSSGSGSPSLLLK        | 2  | 100.0% | 2  |   |            |            |            |            |           |           |           |           |      |      |      |      |      |     |      |     |      |     |      |      |     |      |      |      |     |     |  |  |  |
|           |        |                                                                     |        | VAVLAGSGSGSPSLLLK         | 3  | 100.0% | 1  |   |            |            |            |            |           |           |           |           |      |      |      |      |      |     |      |     |      |     |      |      |     |      |      |      |     |     |  |  |  |
|           |        |                                                                     |        | VDFPDQDLTALGR             | 2  | 100.0% | 3  |   |            |            |            |            |           |           |           |           |      |      |      |      |      |     |      |     |      |     |      |      |     |      |      |      |     |     |  |  |  |
|           |        |                                                                     |        | VWVVGSHGAGK               | 2  | 100.0% | 1  |   |            |            |            |            |           |           |           |           |      |      |      |      |      |     |      |     |      |     |      |      |     |      |      |      |     |     |  |  |  |
|           |        |                                                                     |        | VWVVGSHGAGK               | 3  | 100.0% | 1  |   |            |            |            |            |           |           |           |           |      |      |      |      |      |     |      |     |      |     |      |      |     |      |      |      |     |     |  |  |  |
| P00291093 | POLR2E | DNA-directed RNA polymerases 1, 2, and III subunit RPB2C1           | 99.6%  | 8.1                       | 1  | 1      | 1  | 1 | 1,991.980  | 2,059.560  | 2,292.830  | 2,283.240  | 70.206    | 186.129   | 244.647   | 171.702   | 7.9  | 20.2 | 23.9 | 16.8 | 1.0  | 0.7 | 1.2  | 0.3 | 1.1  | 0.2 | 1.1  | 0.5  | 1.1 | 0.4  | -1.0 | 1    |     |     |  |  |  |
|           |        |                                                                     |        | GYLTGDEDDLEEFK            | 2  | 99.6%  | 1  |   |            |            |            |            |           |           |           |           |      |      |      |      |      |     |      |     |      |     |      |      |     |      |      |      |     |     |  |  |  |
| P00291133 | THO7   | THO complex subunit 7 homolog                                       | 94.5%  | 13                        | 1  | 1      | 1  | 1 | 4,486.840  | 5,230.280  | 5,616.370  | 4,918.300  | 296.500   | 346.627   | 557.649   | 273.854   | 14.8 | 14.8 | 22.2 | 12.5 | 1.2  | 0.1 | 1.3  | 0.1 | 0.3  | 1.1 | 0.6  | -1.1 | 0.6 | -1.1 | 0.5  | -1.1 | 0.3 |     |  |  |  |
|           |        |                                                                     |        | TLVYDMLR                  | 2  | 94.5%  | 1  |   |            |            |            |            |           |           |           |           |      |      |      |      |      |     |      |     |      |     |      |      |     |      |      |      |     |     |  |  |  |
| P00291173 | VCL    | isoform 1 of Vinculin                                               | 100.0% | 22.1                      | 17 | 17     | 20 | 2 | 33,925.934 | 34,040.132 | 33,909.789 | 38,342.938 | 2,368.237 | 1,414.036 | 2,562.161 | 732.210   | 15.4 | 9.3  | 16.8 | 4.3  | 1.0  | 1   | -1.0 | 1   | 1.1  | 0.1 | -1.0 | 1    | 1.1 | 0.03 | 1.1  | 0.03 | 1.1 | 0.2 |  |  |  |
| P00307462 | VCL    | isoform 2 of Vinculin                                               | 100.0% | 20.7                      | 17 | 17     | 20 | 2 | 33,925.934 | 34,040.132 | 33,909.789 | 38,342.938 | 2,368.237 | 1,414.036 | 2,562.161 | 732.210   | 15.4 | 9.3  | 16.8 | 4.3  | 1.0  | 1   | -1.0 | 1   | 1.1  | 0.1 | -1.0 | 1    | 1.1 | 0.03 | 1.1  | 0.03 | 1.1 | 0.2 |  |  |  |
|           |        |                                                                     |        | AGEVWPMMAAR               | 2  | 99.0%  | 1  |   |            |            |            |            |           |           |           |           |      |      |      |      |      |     |      |     |      |     |      |      |     |      |      |      |     |     |  |  |  |
|           |        |                                                                     |        | AIPQLTAPAAVADAVYSLNR      | 2  | 100.0% | 2  |   |            |            |            |            |           |           |           |           |      |      |      |      |      |     |      |     |      |     |      |      |     |      |      |      |     |     |  |  |  |
|           |        |                                                                     |        | AVAGNSGSRK                | 2  | 100.0% | 2  |   |            |            |            |            |           |           |           |           |      |      |      |      |      |     |      |     |      |     |      |      |     |      |      |      |     |     |  |  |  |
|           |        |                                                                     |        | GILSGTSLLLTFDEAEVR        | 2  | 100.0% | 1  |   |            |            |            |            |           |           |           |           |      |      |      |      |      |     |      |     |      |     |      |      |     |      |      |      |     |     |  |  |  |
|           |        |                                                                     |        | GILSGTSLLLTFDEAEVR        | 3  | 99.1%  | 1  |   |            |            |            |            |           |           |           |           |      |      |      |      |      |     |      |     |      |     |      |      |     |      |      |      |     |     |  |  |  |
|           |        |                                                                     |        | ILSTYK                    | 1  | 89.2%  | 1  |   |            |            |            |            |           |           |           |           |      |      |      |      |      |     |      |     |      |     |      |      |     |      |      |      |     |     |  |  |  |
|           |        |                                                                     |        | LLAAVAATAPPDAPNREEVDFER   | 3  | 96.5%  | 1  |   |            |            |            |            |           |           |           |           |      |      |      |      |      |     |      |     |      |     |      |      |     |      |      |      |     |     |  |  |  |
|           |        |                                                                     |        | MLGGMTDQVADR              | 2  | 99.7%  | 1  |   |            |            |            |            |           |           |           |           |      |      |      |      |      |     |      |     |      |     |      |      |     |      |      |      |     |     |  |  |  |
|           |        |                                                                     |        | MSGAENEIR                 | 2  | 99.6%  | 1  |   |            |            |            |            |           |           |           |           |      |      |      |      |      |     |      |     |      |     |      |      |     |      |      |      |     |     |  |  |  |
|           |        |                                                                     |        | MTGLVEAIDTK               | 2  | 100.0% | 1  |   |            |            |            |            |           |           |           |           |      |      |      |      |      |     |      |     |      |     |      |      |     |      |      |      |     |     |  |  |  |
|           |        |                                                                     |        | NGWENNEVK                 | 2  | 90.0%  | 1  |   |            |            |            |            |           |           |           |           |      |      |      |      |      |     |      |     |      |     |      |      |     |      |      |      |     |     |  |  |  |
|           |        |                                                                     |        | SLUNSEAEAK                | 2  | 99.7%  | 1  |   |            |            |            |            |           |           |           |           |      |      |      |      |      |     |      |     |      |     |      |      |     |      |      |      |     |     |  |  |  |
|           |        |                                                                     |        | TNISEESEQATELVHNAQNLMSQVK | 3  | 100.0% | 1  |   |            |            |            |            |           |           |           |           |      |      |      |      |      |     |      |     |      |     |      |      |     |      |      |      |     |     |  |  |  |
|           |        |                                                                     |        | VAMANNQKLVAGATDSAR        | 2  | 100.0% | 1  |   |            |            |            |            |           |           |           |           |      |      |      |      |      |     |      |     |      |     |      |      |     |      |      |      |     |     |  |  |  |
|           |        |                                                                     |        | VGLTFTVDEAWAK             | 2  | 100.0% | 1  |   |            |            |            |            |           |           |           |           |      |      |      |      |      |     |      |     |      |     |      |      |     |      |      |      |     |     |  |  |  |
|           |        |                                                                     |        | VMLVSNMIVYK               | 2  | 100.0% | 1  |   |            |            |            |            |           |           |           |           |      |      |      |      |      |     |      |     |      |     |      |      |     |      |      |      |     |     |  |  |  |
|           |        |                                                                     |        | WBNPVDQR                  | 2  | 98.7%  | 2  |   |            |            |            |            |           |           |           |           |      |      |      |      |      |     |      |     |      |     |      |      |     |      |      |      |     |     |  |  |  |
| P00291204 | NUP133 | Nuclear pore complex protein Nup133                                 | 98.8%  | 10                        | 1  | 1      | 1  | 3 | 2,223.643  | 2,020.253  | 1,515.357  | 2,202.697  | 470.044   | 219.271   | 151.462   | 245.947   | 47.3 | 24.3 | 22.4 | 25.0 | -1.1 | 0.7 | -1.5 | 0.2 | -1.0 | 1   | -1.3 | 0.99 | 1.1 | 0.6  | 1.5  | 0.04 |     |     |  |  |  |
| P00514503 | NUP133 | Uncharacterized protein                                             | 98.8%  | 1.1                       | 1  | 1      | 1  | 3 | 2,223.643  | 2,020.253  | 1,515.357  | 2,202.697  | 470.044   | 219.271   | 151.462   | 245.947   | 47.3 | 24.3 | 22.4 | 25.0 | -1.1 | 0.7 | -1.5 | 0.2 | -1.0 | 1   | -1.3 | 0.99 | 1.1 | 0.6  | 1.5  | 0.04 |     |     |  |  |  |
| P07015229 | NUP133 | LDNA FL55448, highly similar to Nuclear pore complex protein Nup133 | 98.8%  | 1.1                       | 1  | 1      | 1  | 3 | 2,223.643  | 2,020.253  | 1,515.357  | 2,202.697  | 470.044   | 219.271   | 151.462   | 245.947   | 47.3 | 24.3 | 22.4 | 25.0 | -1.1 | 0.7 | -1.5 | 0.2 | -1.0 | 1   | -1.3 | 0.99 | 1.1 | 0.6  | 1.5  | 0.04 |     |     |  |  |  |
|           |        |                                                                     |        | DLLDADQSLSK               | 2  | 98.1%  | 1  |   |            |            |            |            |           |           |           |           |      |      |      |      |      |     |      |     |      |     |      |      |     |      |      |      |     |     |  |  |  |
| P00291210 | PARP14 | isoform 6 of Poly (ADP-ribose) polymerase 14                        | 93.1%  | 0.4                       | 1  | 1      | 1  | 4 | 1,167.110  | 1,442.273  | 1,388.278  | 1,420.748  | 8         |           |           |           |      |      |      |      |      |     |      |     |      |     |      |      |     |      |      |      |     |     |  |  |  |

|            |          |                                                                             |        |      |    |    |    |   |            |            |            |            |            |           |           |           |           |      |      |      |      |      |      |      |      |      |      |      |      |      |      |      |      |
|------------|----------|-----------------------------------------------------------------------------|--------|------|----|----|----|---|------------|------------|------------|------------|------------|-----------|-----------|-----------|-----------|------|------|------|------|------|------|------|------|------|------|------|------|------|------|------|------|
| P00292054  | PK3C2B   | Phosphatidylinositol-4-phosphate 3-kinase C2 domain-containing subunit beta | 99.7%  | 1,1  | 2  | 2  | 2  | 2 | 2          | 3,991,240  | 4,038,330  | 3,966,535  | 4,629,370  | 416,242   | 228,521   | 323,520   | 203,221   | 23.3 | 12.7 | 18.2 | 9.8  | 1.0  | 0.9  | -1.0 | 1.1  | 1.2  | -1.0 | 0.9  | 1.1  | 0.99 | 1.2  | 0.1  |      |
| P00647314  | PK3C2B   | Phosphatidylinositol-3-kinase, class 2, beta polypeptide                    | 99.7%  | 1,1  | 2  | 2  | 2  | 2 | 2          | 3,991,240  | 4,038,330  | 3,966,535  | 4,629,370  | 416,242   | 228,521   | 323,520   | 203,221   | 23.3 | 12.7 | 18.2 | 9.8  | 1.0  | 0.9  | -1.0 | 1.1  | 1.2  | -1.0 | 0.9  | 1.1  | 0.99 | 1.2  | 0.1  |      |
| P00796554  | -        | 43 kDa protein                                                              | 99.8%  | 5,4  | 2  | 2  | 2  | 4 | 4          | 1,847,899  | 1,783,935  | 1,715,349  | 2,016,687  | 130,183   | 77,353    | 91,826    | 70,535    | 15.8 | 9.7  | 12.0 | 7.8  | -1.0 | 0.7  | -1.1 | 0.4  | 1.1  | 0.3  | -1.0 | 0.6  | 1.1  | 0.06 | 1.2  | 0.03 |
| P00797253  | -        | 48 kDa protein                                                              | 99.8%  | 5,4  | 2  | 2  | 2  | 4 | 4          | 1,847,899  | 1,783,935  | 1,715,349  | 2,016,687  | 130,183   | 77,353    | 91,826    | 70,535    | 15.8 | 9.7  | 12.0 | 7.8  | -1.0 | 0.7  | -1.1 | 0.4  | 1.1  | 0.3  | -1.0 | 0.6  | 1.1  | 0.06 | 1.2  | 0.03 |
| P00292294  | EPB49    | isoform Long of Domain                                                      | 99.8%  | 2    | 2  | 2  | 2  | 4 | 4          | 1,847,899  | 1,783,935  | 1,715,349  | 2,016,687  | 130,183   | 77,353    | 91,826    | 70,535    | 15.8 | 9.7  | 12.0 | 7.8  | -1.0 | 0.7  | -1.1 | 0.4  | 1.1  | 0.3  | -1.0 | 0.6  | 1.1  | 0.06 | 1.2  | 0.03 |
| P01015007  | EPB49    | isoform Short of Domain                                                     | 99.8%  | 5,5  | 2  | 2  | 2  | 4 | 4          | 1,847,899  | 1,783,935  | 1,715,349  | 2,016,687  | 130,183   | 77,353    | 91,826    | 70,535    | 15.8 | 9.7  | 12.0 | 7.8  | -1.0 | 0.7  | -1.1 | 0.4  | 1.1  | 0.3  | -1.0 | 0.6  | 1.1  | 0.06 | 1.2  | 0.03 |
| P00292498  | TUBB8    | Tubulin beta-8 chain                                                        | 99.7%  | 11,0 | 2  | 2  | 2  | 2 | 1          | 10,430,623 | 14,267,823 | 9,842,823  | 15,420,110 | 2,040,098 | 1,787,176 | 1,898,777 | 1,409,896 | 43.7 | 28.2 | 43.1 | 20.4 | 1.4  | 0.2  | -1.1 | 0.8  | 1.5  | 0.08 | -1.4 | 0.1  | 1.1  | 0.6  | 1.6  | 0.05 |
| P00292498  | HSPA14   | Heat shock 70 kDa protein 14                                                | 98.7%  | 2,8  | 1  | 1  | 1  | 1 | 1          | 5,684,030  | 6,046,940  | 6,098,560  | 6,641,810  | 582,395   | 312,876   | 248,336   | 437,080   | 22.9 | 11.6 | 9.1  | 14.7 | 1.1  | 0.6  | 1.1  | 0.5  | 1.2  | 0.2  | 1.0  | 0.9  | 1.1  | 0.3  | 1.1  | 0.3  |
| P00292857  | PTGR1    | Prostaglandin reductase 1                                                   | 100.0% | 14,3 | 3  | 4  | 4  | 2 | 3,544,543  | 3,668,611  | 4,210,531  | 3,813,075  | 252,198    | 248,488   | 151,540   | 127,347   | 15.9      | 16.2 | 8.1  | 7.5  | 1.0  | 0.7  | 1.2  | 0.05 | 1.1  | 0.4  | 1.1  | 0.1  | 1.0  | 0.6  | -1.1 | 0.08 |      |
| P00642448  | PTGR1    | prostaglandin reductase 1 isoform 2                                         | 100.0% | 15.3 | 3  | 4  | 4  | 2 | 3,544,543  | 3,668,611  | 4,210,531  | 3,813,075  | 252,198    | 248,488   | 151,540   | 127,347   | 15.9      | 16.2 | 8.1  | 7.5  | 1.0  | 0.7  | 1.2  | 0.05 | 1.1  | 0.4  | 1.1  | 0.1  | 1.0  | 0.6  | -1.1 | 0.08 |      |
| P00292771  | NUMA1    | isoform 1 of Nuclear mitotic apparatus protein 1                            | 100.0% | 13,6 | 18 | 18 | 21 | 1 | 83,553,392 | 84,921,065 | 80,065,892 | 96,008,557 | 5,809,875  | 1,716,947 | 6,006,494 | 3,550,488 | 15.8      | 4.5  | 16.7 | 8.3  | 1.0  | 0.8  | -1.0 | 0.7  | 1.1  | 0.1  | -1.1 | 0.5  | 1.1  | 0.03 | 1.2  | 0.06 |      |
| P00292771  | NUMA1    | isoform 2 of Nuclear mitotic apparatus protein 1                            | 100.0% | 13,6 | 18 | 18 | 21 | 1 | 83,553,392 | 84,921,065 | 80,065,892 | 96,008,557 | 5,809,875  | 1,716,947 | 6,006,494 | 3,550,488 | 15.8      | 4.5  | 16.7 | 8.3  | 1.0  | 0.8  | -1.0 | 0.7  | 1.1  | 0.1  | -1.1 | 0.5  | 1.1  | 0.03 | 1.2  | 0.06 |      |
| P00292979  | CNTN3    | Contactin-3                                                                 | 91.6%  | 2,1  | 1  | 1  | 1  | 1 | 664,125    | 621,964    | 796,276    | 841,868    | 159,524    | 115,303   | 138,054   | 86,346    | 53.7      | 31.4 | 38.8 | 22.9 | 1.2  | 0.4  | 1.2  | 0.5  | 1.3  | 0.4  | -1.0 | 0.9  | 1.0  | 0.9  | 1.1  | 0.8  |      |
| P00292818  | KIAA1456 | Putative methyltransferase KIAA1456                                         | 91.5%  | 6,8  | 1  | 1  | 1  | 3 | 1,096,793  | 1,053,860  | 1,165,853  | 1,044,720  | 42,264     | 54,422    | 44,716    | 37,542    | 8.6       | 11.6 | 8.6  | 8.0  | -1.0 | 0.6  | 1.1  | 0.3  | -1.0 | 0.4  | 1.1  | 0.2  | -1.0 | 0.9  | -1.1 | 0.07 |      |
| P00293079  | KIAA1456 | hypothetical protein LOC57864 isoform 2                                     | 91.5%  | 9,5  | 1  | 1  | 1  | 3 | 1,096,793  | 1,053,860  | 1,165,853  | 1,044,720  | 42,264     | 54,422    | 44,716    | 37,542    | 8.6       | 11.6 | 8.6  | 8.0  | -1.0 | 0.6  | 1.1  | 0.3  | -1.0 | 0.4  | 1.1  | 0.2  | -1.0 | 0.9  | -1.1 | 0.07 |      |
| P001071464 | KIAA1456 | Uncharacterized protein                                                     | 91.5%  | 9,5  | 1  | 1  | 1  | 3 | 1,096,793  | 1,053,860  | 1,165,853  | 1,044,720  | 42,264     | 54,422    | 44,716    | 37,542    | 8.6       | 11.6 | 8.6  | 8.0  | -1.0 | 0.6  | 1.1  | 0.3  | -1.0 | 0.4  | 1.1  | 0.2  | -1.0 | 0.9  | -1.1 | 0.07 |      |
| P00292894  | TSR1     | Pre-RNA-processing protein TSR1 homolog                                     | 99.3%  | 1,8  | 1  | 1  | 1  | 1 | 2,128,550  | 2,187,230  | 2,029,620  | 2,567,130  | 286,630    | 139,728   | 258,222   | 72,996    | 30.1      | 14.3 | 29.4 | 6.4  | 1.0  | 0.9  | 1.1  | 0.7  | 1.2  | 0.2  | 1.0  | 0.8  | 1.2  | 0.05 | 1.1  | 0.3  |      |
| P00293078  | DDX27    | Probable ATP-dependent RNA helicase DDX27                                   | 98.9%  | 1,3  | 1  | 1  | 1  | 1 | 3,258,000  | 3,575,210  | 3,227,050  | 4,177,740  | 507,558    | 289,325   | 179,838   | 56,037    | 34.8      | 18.1 | 12.5 | 3.0  | 1.1  | 0.6  | -1.0 | 1.1  | 0.1  | -1.3 | 0.2  | 1.1  | 0.1  | 1.3  | 0.04 |      |      |
| P00293088  | GAA      | Lysosomal alpha-glucosidase                                                 | 100.0% | 2,9  | 2  | 2  | 2  | 1 | 18,129,980 | 18,181,790 | 19,458,570 | 18,922,900 | 691,423    | 804,003   | 640,524   | 997,881   | 7.4       | 9.9  | 7.4  | 11.8 | 1.0  | 1    | 1.1  | 0.2  | 1.0  | 1.0  | 0.6  | -1.0 | 0.7  | 1.0  | 0.6  |      |      |
| P00293128  | TBCB     | Tubulin-binding collector B                                                 | 100.0% | 2    | 2  | 2  | 2  | 1 | 4,595,800  | 5,437,201  | 4,854,686  | 5,279,307  | 344,225    | 491,863   | 310,203   | 288,459   | 16.8      | 20.2 | 14.3 | 12.2 | 1.2  | 0.2  | 1.1  | 0.6  | 1.1  | 0.2  | -1.1 | 0.3  | -1.0 | 0.8  | 1.1  | 0.3  |      |
| P00293163  | SUGP2    | isoform 3 of SURP and G-patch domain-containing protein 2                   | 91.0%  | 1,8  | 1  | 1  | 1  | 2 | 205,029    | 208,188    | 254,890    | 261,952    | 13,629     | 14,709    | 17,910    | 14,018    | 14.9      | 15.8 | 15.7 | 12.0 | 1.0  | 0.9  | 1.2  | 0.06 | 1.3  | 0.02 | 1.2  | 0.08 | 1.3  | 0.03 | 1.0  | 0.8  |      |
| P00054438  | SUGP2    | isoform 4 of SURP and G-patch domain-containing protein 2                   | 91.0%  | 1,8  | 1  | 1  | 1  | 2 | 205,029    | 208,188    | 254,890    | 261,952    | 13,629     | 14,709    | 17,910    | 14,018    | 14.9      | 15.8 | 15.7 | 12.0 | 1.0  | 0.9  | 1.2  | 0.06 | 1.3  | 0.02 | 1.2  | 0.08 | 1.3  | 0.03 | 1.0  | 0.8  |      |
| P00293260  | DNAJC10  | isoform 1 of DnaJ homolog subfamily C member 10                             | 97.8%  | 5    | 5  | 5  | 5  | 4 | 468,366    | 464,404    | 500,978    | 478,828    | 26,570     | 13,403    | 51,631    | 42,818    | 12.7      | 6.5  | 23.1 | 20.0 | -1.0 | 0.9  | 1.1  | 0.6  | 1.0  | 0.8  | 1.1  | 0.5  | 1.0  | 0.8  | -1.0 | 0.7  |      |
| P003844113 | DNAJC10  | isoform 2 of DnaJ homolog subfamily C member 10                             | 97.8%  | 2,3  | 1  | 1  | 1  | 5 | 468,366    | 464,404    | 500,978    | 478,828    | 26,570     | 13,403    | 51,631    | 42,818    | 12.7      | 6.5  | 23.1 | 20.0 | -1.0 | 0.9  | 1.1  | 0.6  | 1.0  | 0.8  | 1.1  | 0.5  | 1.0  | 0.8  | -1.0 | 0.7  |      |
| P00873784  | DNAJC10  | DnaJ (DnaJ) homolog, subfamily C, member 10, isoform CRA_B                  | 97.8%  | 9    | 5  | 5  | 5  | 4 | 468,366    | 464,404    | 500,978    | 478,828    | 26,570     | 13,403    | 51,631    | 42,818    | 12.7      | 6.5  | 23.1 | 20.0 | -1.0 | 0.9  | 1.1  | 0.6  | 1.0  | 0.8  | 1.1  | 0.5  | 1.0  | 0.8  | -1.0 | 0.7  |      |
| P001012003 | DNAJC10  | 21 kDa protein                                                              | 97.8%  | 9,6  | 1  | 1  | 1  | 5 | 468,366    | 464,404    | 500,978    | 478,828    | 26,570     | 13,403    | 51,631    | 42,818    | 12.7      | 6.5  | 23.1 | 20.0 | -1.0 | 0.9  | 1.1  | 0.6  | 1.0  | 0.8  | 1.1  | 0.5  | 1.0  | 0.8  | -1.0 | 0.7  |      |
| P010160074 | DNAJC10  | Uncharacterized protein                                                     | 97.8%  | 6,2  | 1  | 1  | 1  | 5 | 468,366    | 464,404    | 500,978    | 478,828    | 26,570     | 13,403    | 51,631    | 42,818    | 12.7      | 6.5  | 23.1 | 20.0 | -1.0 | 0.9  | 1.1  | 0.6  | 1.0  | 0.8  | 1.1  | 0.5  | 1.0  | 0.8  | -1.0 | 0.7  |      |
| P00293276  | MIF      | Macrophage migration inhibitory factor                                      | 100.0% | 26,1 | 2  | 2  | 4  | 1 | 25,658,910 | 24,886,390 | 25,039,870 | 31,499,200 | 2,901,375  | 2,003,327 | 2,132,847 | 2,451,021 | 24.4      | 18.0 | 19.1 | 17.4 | -1.0 | 0.8  | -1.0 | 0.9  | 1.0  | 1.1  | 1.3  | 0.07 | 1.3  | 0.08 |      |      |      |
| P00293303  | LG3N     | Legumain                                                                    | 98.4%  | 3,9  | 1  | 1  | 1  | 4 | 690,338    | 652,825    | 759,373    | 790,973    | 46,681     | 29,915    | 52,094    | 53,034    | 15.1      | 10.3 | 15.3 | 15.0 | -1.1 | 0.5  | 1.1  | 0.4  | 1.1  | 0.2  | 1.2  | 0.1  | 1.2  | 0.05 | 1.0  | 0.7  |      |
| P003841123 | LG3N     | Full-length cDNA clone C50D002YH20 of Placenta of Homo sapiens              | 98.4%  | 4,6  | 1  | 1  | 1  | 4 | 690,338    | 652,825    | 759,373    | 790,973    | 46,681     | 29,915    | 52,094    | 53,034    | 15.1      | 10.3 | 15.3 | 15.0 | -1.1 | 0.5  | 1.1  | 0.4  | 1.1  | 0.2  | 1.2  | 0.1  | 1.2  | 0.05 | 1.0  | 0.7  |      |
| P003841158 | LG3N     | Full-length cDNA clone C50D001YK19 of Neuroblastoma of Homo sapiens         | 98.4%  | 4,5  | 1  | 1  | 1  | 4 | 690,338    | 652,825    | 759,373    | 790,973    | 46,681     | 29,915    | 52,094    | 53,034    | 15.1      | 10.3 | 15.3 | 15.0 | -1.1 | 0.5  | 1.1  | 0.4  | 1.1  | 0.2  | 1.2  | 0.1  | 1.2  | 0.05 | 1.0  | 0.7  |      |
| P01013923  | LG3N     | cDNA FLJ35086, highly similar to Legumain                                   | 98.4%  | 4,2  | 1  | 1  | 1  | 4 | 690,338    | 652,825    | 759,373    | 790,973    | 46,681     | 29,915    | 52,094    | 53,034    | 15.1      | 10.3 | 15.3 | 15.0 | -1.1 | 0.5  | 1.1  | 0.4  | 1.1  | 0.2  | 1.2  | 0.1  | 1.2  | 0.05 | 1.0  | 0.7  |      |
| P00293330  | PLN2     | Plenion-2                                                                   | 100.0% | 9    | 2  | 2  | 2  | 1 | 38,308,705 | 38,698,080 | 40,188,315 | 43,885,610 | 3,706,071  | 1,824,961 | 2,325,918 | 225,198   | 21.6      | 10.6 | 12.9 | 1.2  | 1.0  | 0.9  | 1.0  | 0.7  | 1.1  | 0.2  | 1.0  | 0.6  | 1.1  | 0.04 | 1.1  | 0.2  |      |
| P00293337  | P2RX4    | P2X purinoceptor 4                                                          | 93.5%  | 3,9  | 1  | 1  | 1  | 4 | 629,118    | 587,545    | 587,273    | 717,330    | 67,355     | 20,694    | 52,073    | 39,203    | 23.9      | 7.9  | 19.8 | 12.2 | -1.1 | 0.6  | -1.1 | 0.6  | 1.1  | 0.3  | -1.0 | 1    | 1.2  | 0.02 | 1.2  | 0.08 |      |
| P020478728 | P2RX4    | P2X purinoceptor                                                            | 93.5%  | 4,2  | 1  | 1  | 1  | 4 | 629,118    | 587,545    | 587,273    | 717,330    | 67,355     | 20,694    | 52,073    | 39,203    | 23.9      | 7.9  | 19.8 | 12.2 | -1.1 | 0.6  | -1.1 | 0.6  | 1.1  | 0.3  | -1.0 | 1    | 1.2  | 0.02 | 1.2  | 0.08 |      |
| P00792078  | P2RX4    | P2X purinoceptor                                                            | 93.5%  | 4,2  | 1  | 1  |    |   |            |            |            |            |            |           |           |           |           |      |      |      |      |      |      |      |      |      |      |      |      |      |      |      |      |



|           |         |                                                                                                      |        |                          |    |       |    |   |            |            |            |            |           |           |           |           |         |         |      |      |      |      |      |      |      |     |     |      |     |       |       |      |      |     |
|-----------|---------|------------------------------------------------------------------------------------------------------|--------|--------------------------|----|-------|----|---|------------|------------|------------|------------|-----------|-----------|-----------|-----------|---------|---------|------|------|------|------|------|------|------|-----|-----|------|-----|-------|-------|------|------|-----|
| P10029544 | CDC39   | isoform 2 of Coiled-coil domain-containing protein 39                                                | 97.6%  | KIDLINLSRAAK             | 2  | 84.1% | 1  | 1 | 1          | 2          | 1,077,965  | 961,825    | 1,284,067 | 1,099,407 | 117,008   | 91,141    | 157,718 | 214,154 | 24.3 | 21.2 | 27.5 | 43.6 | -1.1 | 0.6  | 1.2  | 0.3 | 1.0 | 0.9  | 1.3 | 0.1   | 1.1   | 0.6  | -1.2 | 0.5 |
| P10071922 | CDC39   | isoform 1 of Coiled-coil domain-containing protein 39                                                | 97.6%  | 1                        | 1  | 1     | 1  | 1 | 2          | 1,077,965  | 961,825    | 1,284,067  | 1,099,407 | 117,008   | 91,141    | 157,718   | 214,154 | 24.3    | 21.2 | 27.5 | 43.6 | -1.1 | 0.6  | 1.2  | 0.3  | 1.0 | 0.9 | 1.3  | 0.1 | 1.1   | 0.6   | -1.2 | 0.5  |     |
| P10029542 | NUCB1   | Nucleobindin 1                                                                                       | 100.0% | AELVLESLK                | 2  | 2     | 2  | 2 | 2          | 1,925,867  | 1,965,352  | 2,389,643  | 2,100,113 | 130,723   | 237,348   | 115,482   | 76,183  | 15.2    | 27.0 | 10.8 | 8.1  | 1.0  | 0.9  | 1.2  | 0.03 | 1.1 | 0.3 | 1.2  | 0.1 | 1.1   | 0.6   | -1.1 | 0.07 |     |
| P10029558 | CBARA1  | isoform 3 of Calcium uptake protein 1, mitochondrial                                                 | 95.8%  | DLELQVYR<br>LVTLLEAFSLQR | 2  | 99.4% | 1  | 1 | 1          | 145,651    | 148,646    | 150,276    | 186,138   | 13,444    | 20,142    | 31,533    | 17,665  | 20.6    | 30.3 | 46.9 | 21.2 | 1.0  | 0.9  | 1.0  | 0.9  | 1.3 | 0.1 | 1.0  | 1.3 | 0.2   | 1.2   | 0.4  |      |     |
| P10087213 | CBARA1  | isoform 2 of Calcium uptake protein 1, mitochondrial                                                 | 95.8%  | 4.4                      | 1  | 1     | 1  | 1 | 5          | 145,651    | 148,646    | 150,276    | 186,138   | 13,444    | 20,142    | 31,533    | 17,665  | 20.6    | 30.3 | 46.9 | 21.2 | 1.0  | 0.9  | 1.0  | 0.9  | 1.3 | 0.1 | 1.0  | 1.3 | 0.2   | 1.2   | 0.4  |      |     |
| P10087214 | CBARA1  | 55 kDa protein                                                                                       | 95.8%  | 4.4                      | 1  | 1     | 1  | 1 | 5          | 145,651    | 148,646    | 150,276    | 186,138   | 13,444    | 20,142    | 31,533    | 17,665  | 20.6    | 30.3 | 46.9 | 21.2 | 1.0  | 0.9  | 1.0  | 0.9  | 1.3 | 0.1 | 1.0  | 1.3 | 0.2   | 1.2   | 0.4  |      |     |
| P10088290 | CBARA1  | isoform 1 of Calcium uptake protein 1, mitochondrial                                                 | 95.8%  | 5.2                      | 1  | 1     | 1  | 1 | 5          | 145,651    | 148,646    | 150,276    | 186,138   | 13,444    | 20,142    | 31,533    | 17,665  | 20.6    | 30.3 | 46.9 | 21.2 | 1.0  | 0.9  | 1.0  | 0.9  | 1.3 | 0.1 | 1.0  | 1.3 | 0.2   | 1.2   | 0.4  |      |     |
| P10091756 | CBARA1  | Uncharacterized protein                                                                              | 95.8%  | 5.2                      | 1  | 1     | 1  | 1 | 5          | 145,651    | 148,646    | 150,276    | 186,138   | 13,444    | 20,142    | 31,533    | 17,665  | 20.6    | 30.3 | 46.9 | 21.2 | 1.0  | 0.9  | 1.0  | 0.9  | 1.3 | 0.1 | 1.0  | 1.3 | 0.2   | 1.2   | 0.4  |      |     |
| P10029570 | ALSCSR8 | isoform 1 of Amyotrophic lateral sclerosis 2 chromosomal region candidate gene 8                     | 92.3%  | 30.1                     | 1  | 1     | 1  | 1 | 3          | 3,845,803  | 4,167,767  | 3,908,997  | 4,599,000 | 388,044   | 136,102   | 246,150   | 69,882  | 21.4    | 7.3  | 14.1 | 3.4  | 1.1  | 0.4  | 1.0  | 0.9  | 1.2 | 0.1 | -1.1 | 0.4 | 1.1   | 0.02  | 1.2  | 0.05 |     |
| P10029571 | ALSCSR8 | isoform 2 of Amyotrophic lateral sclerosis 2 chromosomal region candidate gene 8                     | 92.3%  | 20                       | 1  | 1     | 1  | 1 | 3          | 3,845,803  | 4,167,767  | 3,908,997  | 4,599,000 | 388,044   | 136,102   | 246,150   | 69,882  | 21.4    | 7.3  | 14.1 | 3.4  | 1.1  | 0.4  | 1.0  | 0.9  | 1.2 | 0.1 | -1.1 | 0.4 | 1.1   | 0.02  | 1.2  | 0.05 |     |
| P10029523 | ALSCSR8 | cDNA FLJ59532; highly similar to Amyotrophic lateral sclerosis 2 chromosomal region candidate gene 8 | 92.3%  | 20                       | 1  | 1     | 1  | 1 | 3          | 3,845,803  | 4,167,767  | 3,908,997  | 4,599,000 | 388,044   | 136,102   | 246,150   | 69,882  | 21.4    | 7.3  | 14.1 | 3.4  | 1.1  | 0.4  | 1.0  | 0.9  | 1.2 | 0.1 | -1.1 | 0.4 | 1.1   | 0.02  | 1.2  | 0.05 |     |
| P10029574 | CTSB    | Cathepsin B                                                                                          | 100.0% | 37.1                     | 7  | 8     | 10 | 2 | 19,297,820 | 19,215,438 | 19,130,864 | 21,532,503 | 1,281,084 | 476,560   | 1,120,581 | 430,821   | 14.8    | 5.6     | 13.1 | 4.5  | -1.0 | -1.0 | 1.0  | -1.0 | 0.9  | 1.1 | 0.2 | -1.0 | 0.9 | 1.1   | 0.007 | 1.1  | 0.1  |     |
| P10029590 | CTSB    | Uncharacterized protein                                                                              | 100.0% | 37.1                     | 7  | 8     | 10 | 2 | 19,297,820 | 19,215,438 | 19,130,864 | 21,532,503 | 1,281,084 | 476,560   | 1,120,581 | 430,821   | 14.8    | 5.6     | 13.1 | 4.5  | -1.0 | -1.0 | 1.0  | -1.0 | 0.9  | 1.1 | 0.2 | -1.0 | 0.9 | 1.1   | 0.007 | 1.1  | 0.1  |     |
| P10029572 | CYP51A1 | lanosterol 14-alpha demethylase isoform 1                                                            | 99.9%  | 4.7                      | 2  | 2     | 2  | 2 | 2,649,495  | 2,527,654  | 2,888,218  | 2,834,003  | 380,609   | 162,520   | 232,473   | 139,404   | 32.1    | 14.4    | 18.0 | 11.0 | -1.0 | 0.8  | 1.1  | 0.6  | 1.1  | 0.7 | 1.1 | 0.2  | 1.1 | 0.2   | -1.0  | 0.8  |      |     |
| P10101316 | CYP51A1 | cDNA FLJ34004; lnc, clone FC8BF100032; highly similar to Cyclochole P450 51A                         | 99.9%  | 5.4                      | 2  | 2     | 2  | 2 | 2,649,495  | 2,527,654  | 2,888,218  | 2,834,003  | 380,609   | 162,520   | 232,473   | 139,404   | 32.1    | 14.4    | 18.0 | 11.0 | -1.0 | 0.8  | 1.1  | 0.6  | 1.1  | 0.7 | 1.1 | 0.2  | 1.1 | 0.2   | -1.0  | 0.8  |      |     |
| P10029585 | COPB1   | Cotasterone subunit beta                                                                             | 100.0% | 15.7                     | 10 | 10    | 10 | 1 | 51,126,910 | 53,400,860 | 55,987,780 | 60,172,970 | 5,048,046 | 818,815   | 2,954,479 | 1,042,619 | 21.6    | 3.4     | 11.8 | 3.9  | 1.0  | 0.8  | 1.1  | 0.5  | 1.2  | 0.2 | 1.0 | 0.4  | 1.1 | 0.009 | 1.1   | 0.2  |      |     |
| P10029586 | COPB1   | Uncharacterized protein                                                                              | 100.0% | 15.7                     | 10 | 10    | 10 | 1 | 51,126,910 | 53,400,860 | 55,987,780 | 60,172,970 | 5,048,046 | 818,815   | 2,954,479 | 1,042,619 | 21.6    | 3.4     | 11.8 | 3.9  | 1.0  | 0.8  | 1.1  | 0.5  | 1.2  | 0.2 | 1.0 | 0.4  | 1.1 | 0.009 | 1.1   | 0.2  |      |     |
| P10029587 | COPB1   | Uncharacterized protein                                                                              | 100.0% | 15.7                     | 10 | 10    | 10 | 1 | 51,126,910 | 53,400,860 | 55,987,780 | 60,172,970 | 5,048,046 | 818,815   | 2,954,479 | 1,042,619 | 21.6    | 3.4     | 11.8 | 3.9  | 1.0  | 0.8  | 1.1  | 0.5  | 1.2  | 0.2 | 1.0 | 0.4  | 1.1 | 0.009 | 1.1   | 0.2  |      |     |
| P10029605 | FH      | isoform Mitochondrial of Fumarate hydratase, mitochondrial                                           | 100.0% | 20.6                     | 5  | 5     | 6  | 2 | 8,323,947  | 8,097,353  | 8,368,465  | 9,307,255  | 962,741   | 321,786   | 720,192   | 360,558   | 25.9    | 8.9     | 19.2 | 8.6  | -1.0 | 0.8  | 1.0  | 1.1  | 1.1  | 0.4 | 1.0 | 0.7  | 1.2 | 0.03  | 1.1   | 0.3  |      |     |
| P10075971 | FH      | isoform Cytosolic of Fumarate hydratase, mitochondrial                                               | 100.0% | 20.6                     | 5  | 5     | 6  | 2 | 8,323,947  | 8,097,353  | 8,368,465  | 9,307,255  | 962,741   | 321,786   | 720,192   | 360,558   | 25.9    | 8.9     | 19.2 | 8.6  | -1.0 | 0.8  | 1.0  | 1.1  | 1.1  | 0.4 | 1.0 | 0.7  | 1.2 | 0.03  | 1.1   | 0.3  |      |     |
| P10029624 | FH      | Uncharacterized protein                                                                              | 100.0% | 20.6                     | 5  | 5     | 6  | 2 | 8,323,947  | 8,097,353  | 8,368,465  | 9,307,255  | 962,741   | 321,786   | 720,192   | 360,558   | 25.9    | 8.9     | 19.2 | 8.6  | -1.0 | 0.8  | 1.0  | 1.1  | 1.1  | 0.4 | 1.0 | 0.7  | 1.2 | 0.03  | 1.1   | 0.3  |      |     |
| P10029619 | FH      | Uncharacterized protein                                                                              | 100.0% | 20.6                     | 5  | 5     | 6  | 2 | 8,323,947  | 8,097,353  | 8,368,465  | 9,307,255  | 962,741   | 321,786   | 720,192   | 360,558   | 25.9    | 8.9     | 19.2 | 8.6  | -1.0 | 0.8  | 1.0  | 1.1  | 1.1  | 0.4 | 1.0 | 0.7  | 1.2 | 0.03  | 1.1   | 0.3  |      |     |
| P10029618 | FH      | Uncharacterized protein                                                                              | 100.0% | 20.6                     | 5  | 5     | 6  | 2 | 8,323,947  | 8,097,353  | 8,368,465  | 9,307,255  | 962,741   | 321,786   | 720,192   | 360,558   | 25.9    | 8.9     | 19.2 | 8.6  | -1.0 | 0.8  | 1.0  | 1.1  | 1.1  | 0.4 | 1.0 | 0.7  | 1.2 | 0.03  | 1.1   | 0.3  |      |     |
| P10029617 | FH      | Uncharacterized protein                                                                              | 100.0% | 20.6                     | 5  | 5     | 6  | 2 | 8,323,947  | 8,097,353  | 8,368,465  | 9,307,255  | 962,741   | 321,786   | 720,192   | 360,558   | 25.9    | 8.9     | 19.2 | 8.6  | -1.0 | 0.8  | 1.0  | 1.1  | 1.1  | 0.4 | 1.0 | 0.7  | 1.2 | 0.03  | 1.1   | 0.3  |      |     |
| P10029616 | FH      | Uncharacterized protein                                                                              | 100.0% | 20.6                     | 5  | 5     | 6  | 2 | 8,323,947  | 8,097,353  | 8,368,465  | 9,307,255  | 962,741   | 321,786   | 720,192   | 360,558   | 25.9    | 8.9     | 19.2 | 8.6  | -1.0 | 0.8  | 1.0  | 1.1  | 1.1  | 0.4 | 1.0 | 0.7  | 1.2 | 0.03  | 1.1   | 0.3  |      |     |
| P10029615 | FH      | Uncharacterized protein                                                                              | 100.0% | 20.6                     | 5  | 5     | 6  | 2 | 8,323,947  | 8,097,353  | 8,368,465  | 9,307,255  | 962,741   | 321,786   | 720,192   | 360,558   | 25.9    | 8.9     | 19.2 | 8.6  | -1.0 | 0.8  | 1.0  | 1.1  | 1.1  | 0.4 | 1.0 | 0.7  | 1.2 | 0.03  | 1.1   | 0.3  |      |     |
| P10029614 | FH      | Uncharacterized protein                                                                              | 100.0% | 20.6                     | 5  | 5     | 6  | 2 | 8,323,947  | 8,097,353  | 8,368,465  | 9,307,255  | 962,741   | 321,786   | 720,192   | 360,558   | 25.9    | 8.9     | 19.2 | 8.6  | -1.0 | 0.8  | 1.0  | 1.1  | 1.1  | 0.4 | 1.0 | 0.7  | 1.2 | 0.03  | 1.1   | 0.3  |      |     |
| P10029613 | FH      | Uncharacterized protein                                                                              | 100.0% | 20.6                     | 5  | 5     | 6  | 2 | 8,323,947  | 8,097,353  | 8,368,465  | 9,307,255  | 962,741   | 321,786   | 720,192   | 360,558   | 25.9    | 8.9     | 19.2 | 8.6  | -1.0 | 0.8  | 1.0  | 1.1  | 1.1  | 0.4 | 1.0 | 0.7  | 1.2 | 0.03  | 1.1   | 0.3  |      |     |
| P10029612 | FH      | Uncharacterized protein                                                                              | 100.0% | 20.6                     | 5  | 5     | 6  | 2 | 8,323,947  | 8,097,353  | 8,368,465  | 9,307,255  | 962,741   | 321,786   | 720,192   | 360,558   | 25.9    | 8.9     | 19.2 | 8.6  | -1.0 | 0.8  | 1.0  | 1.1  | 1.1  | 0.4 | 1.0 | 0.7  | 1.2 | 0.03  | 1.1   | 0.3  |      |     |
| P10029611 | FH      | Uncharacterized protein                                                                              | 100.0% | 20.6                     | 5  | 5     | 6  | 2 | 8,323,947  | 8,097,353  | 8,368,465  | 9,307,255  | 962,741   | 321,786   | 720,192   | 360,558   | 25.9    | 8.9     | 19.2 | 8.6  | -1.0 | 0.8  | 1.0  | 1.1  | 1.1  | 0.4 | 1.0 | 0.7  | 1.2 | 0.03  | 1.1   | 0.3  |      |     |
| P10029610 | FH      | Uncharacterized protein                                                                              | 100.0% | 20.6                     | 5  | 5     | 6  | 2 | 8,323,947  | 8,097,353  | 8,368,465  | 9,307,255  | 962,741   | 321,786   | 720,192   | 360,558   | 25.9    | 8.9     | 19.2 | 8.6  | -1.0 | 0.8  | 1.0  | 1.1  | 1.1  | 0.4 | 1.0 | 0.7  | 1.2 | 0.03  | 1.1   | 0.3  |      |     |
| P10029609 | FH      | Uncharacterized protein                                                                              | 100.0% | 20.6                     | 5  | 5     | 6  | 2 | 8,323,947  | 8,097,353  | 8,368,465  | 9,307,255  | 962,741   | 321,786   | 720,192   | 360,558   | 25.9    | 8.9     | 19.2 | 8.6  | -1.0 | 0.8  | 1.0  | 1.1  | 1.1  | 0.4 | 1.0 | 0.7  | 1.2 | 0.03  | 1.1   | 0.3  |      |     |
| P10029608 | FH      | Uncharacterized protein                                                                              | 100.0% | 20.6                     | 5  | 5     | 6  | 2 | 8,323,947  | 8,097,353  | 8,368,465  | 9,307,255  | 962,741   | 321,786   | 720,192   | 360,558   | 25.9    | 8.9     | 19.2 | 8.6  | -1.0 | 0.8  | 1.0  | 1.1  | 1.1  | 0.4 | 1.0 | 0.7  | 1.2 | 0.03  | 1.1   | 0.3  |      |     |
| P10029607 | FH      | Uncharacterized protein                                                                              | 100.0% | 20.6                     | 5  | 5     | 6  | 2 | 8,323,947  | 8,097,353  | 8,368,465  | 9,307,255  | 962,741   | 321,786   | 720,192   | 360,558   | 25.9    | 8.9     | 19.2 | 8.6  | -1.0 | 0.8  | 1.0  | 1.1  | 1.1  | 0.4 | 1.0 | 0.7  | 1.2 | 0.03  | 1.1   | 0.3  |      |     |
| P10029606 | FH      | Uncharacterized protein                                                                              | 100.0% | 20.6                     | 5  | 5     | 6  | 2 | 8,323,947  | 8,097,353  | 8,368,465  | 9,307,255  | 962,741   | 321,786   | 720,192   | 360,558   | 25.9    | 8.9     | 19.2 | 8.6  | -1.0 | 0.8  | 1.0  | 1.1  | 1.1  | 0.4 | 1.0 | 0.7  | 1.2 | 0.    |       |      |      |     |

|            |         |                                                                                    |        |        |        |   |   |           |            |            |            |            |           |           |           |           |      |      |      |      |      |      |      |      |      |       |      |      |      |       |      |       |  |  |  |
|------------|---------|------------------------------------------------------------------------------------|--------|--------|--------|---|---|-----------|------------|------------|------------|------------|-----------|-----------|-----------|-----------|------|------|------|------|------|------|------|------|------|-------|------|------|------|-------|------|-------|--|--|--|
| P0028192   | CD44    | isoform 17 of CD44 antigen                                                         | 99.6%  | 1.9    | 1      | 1 | 1 | 19        | 960.847    | 957.679    | 932.911    | 999.858    | 34.279    | 23.050    | 38.399    | 21.787    | 8.0  | 5.4  | 9.2  | 4.9  | -1.0 | 0.9  | -1.0 | 0.6  | 1.0  | 0.4   | -1.0 | 0.6  | 1.0  | 0.2   | 1.1  | 0.2   |  |  |  |
| P0028192   | CD44    | cDNA FLJ52702, highly similar to Homo sapiens CD44 antigen (homing function and    | 99.6%  | 4.0    | 1      | 1 | 1 | 19        | 960.847    | 957.679    | 932.911    | 999.858    | 34.279    | 23.050    | 38.399    | 21.787    | 8.0  | 5.4  | 9.2  | 4.9  | -1.0 | 0.9  | -1.0 | 0.6  | 1.0  | 0.4   | -1.0 | 0.6  | 1.0  | 0.2   | 1.1  | 0.2   |  |  |  |
| P00282478  | CD44    | CD44 antigen isoform 7 precursor                                                   | 99.6%  | 3.8    | 1      | 1 | 1 | 19        | 960.847    | 957.679    | 932.911    | 999.858    | 34.279    | 23.050    | 38.399    | 21.787    | 8.0  | 5.4  | 9.2  | 4.9  | -1.0 | 0.9  | -1.0 | 0.6  | 1.0  | 0.4   | -1.0 | 0.6  | 1.0  | 0.2   | 1.1  | 0.2   |  |  |  |
| P00282478  | CD44    | isoform 3 of CD44 antigen                                                          | 99.6%  | 1.8    | 1      | 1 | 1 | 19        | 960.847    | 957.679    | 932.911    | 999.858    | 34.279    | 23.050    | 38.399    | 21.787    | 8.0  | 5.4  | 9.2  | 4.9  | -1.0 | 0.9  | -1.0 | 0.6  | 1.0  | 0.4   | -1.0 | 0.6  | 1.0  | 0.2   | 1.1  | 0.2   |  |  |  |
| P00282478  | CD44    | 31 kDa protein                                                                     | 99.6%  | 4.5    | 1      | 1 | 1 | 19        | 960.847    | 957.679    | 932.911    | 999.858    | 34.279    | 23.050    | 38.399    | 21.787    | 8.0  | 5.4  | 9.2  | 4.9  | -1.0 | 0.9  | -1.0 | 0.6  | 1.0  | 0.4   | -1.0 | 0.6  | 1.0  | 0.2   | 1.1  | 0.2   |  |  |  |
| P00282503  | CD44    | 20 kDa protein                                                                     | 99.6%  | 1      | 1      | 1 | 1 | 19        | 960.847    | 957.679    | 932.911    | 999.858    | 34.279    | 23.050    | 38.399    | 21.787    | 8.0  | 5.4  | 9.2  | 4.9  | -1.0 | 0.9  | -1.0 | 0.6  | 1.0  | 0.4   | -1.0 | 0.6  | 1.0  | 0.2   | 1.1  | 0.2   |  |  |  |
| P00282624  | CD44    | 9 kDa protein                                                                      | 99.6%  | 15.9   | 1      | 1 | 1 | 19        | 960.847    | 957.679    | 932.911    | 999.858    | 34.279    | 23.050    | 38.399    | 21.787    | 8.0  | 5.4  | 9.2  | 4.9  | -1.0 | 0.9  | -1.0 | 0.6  | 1.0  | 0.4   | -1.0 | 0.6  | 1.0  | 0.2   | 1.1  | 0.2   |  |  |  |
| P00284538  | CD44    | isoform 7 of CD44 antigen                                                          | 99.6%  | 1.8    | 1      | 1 | 1 | 19        | 960.847    | 957.679    | 932.911    | 999.858    | 34.279    | 23.050    | 38.399    | 21.787    | 8.0  | 5.4  | 9.2  | 4.9  | -1.0 | 0.9  | -1.0 | 0.6  | 1.0  | 0.4   | -1.0 | 0.6  | 1.0  | 0.2   | 1.1  | 0.2   |  |  |  |
| P00297241  | URB1    | Nucleolar pre-ribosomal-associated protein 1                                       | 99.5%  | 2      | 99.6%  | 1 | 1 | 1         | 8,845,370  | 7,505,000  | 11,004,970 | 8,199,640  | 364,956   | 950,515   | 533,247   | 430,845   | 9.2  | 28.3 | 10.8 | 11.8 | -1.2 | 0.2  | 1.2  | 0.01 | -1.1 | 0.3   | 1.5  | 0.01 | 1.1  | 0.5   | -1.3 | 0.003 |  |  |  |
| P00297241  | URB1    | MLLTAVLVYSSPSSVVR                                                                  | 2      | 98.6%  | 1      | 1 | 1 | 1         |            |            |            |            |           |           |           |           |      |      |      |      |      |      |      |      |      |       |      |      |      |       |      |       |  |  |  |
| P00297241  | URB1    | KPSEMEIIEVQK                                                                       | 2      | 95.1%  | 1      | 1 | 1 | 1         |            |            |            |            |           |           |           |           |      |      |      |      |      |      |      |      |      |       |      |      |      |       |      |       |  |  |  |
| P00297322  | ARFGAP2 | ADP-ribosylation factor GTPase-activating protein 2                                | 100.0% | 5.8    | 2      | 2 | 2 | 3         | 1,931,487  | 1,577,048  | 1,443,728  | 1,681,360  | 158,173   | 172,229   | 142,588   | 169,737   | 18.3 | 24.4 | 22.1 | 22.6 | -1.2 | 0.2  | -1.3 | 0.05 | -1.1 | 0.3   | -1.1 | 0.6  | 1.1  | 0.7   | 1.2  | 0.3   |  |  |  |
| P00297354  | ARFGAP2 | cDNA FLJ58830, highly similar to Homo sapiens zinc finger protein 289, ID1 regulat | 100.0% | 7.6    | 2      | 2 | 2 | 3         | 1,931,487  | 1,577,048  | 1,443,728  | 1,681,360  | 158,173   | 172,229   | 142,588   | 169,737   | 18.3 | 24.4 | 22.1 | 22.6 | -1.2 | 0.2  | -1.3 | 0.05 | -1.1 | 0.3   | -1.1 | 0.6  | 1.1  | 0.7   | 1.2  | 0.3   |  |  |  |
| P00297452  | ARFGAP2 | cDNA FLJ53874, highly similar to Homo sapiens zinc finger protein 289, ID1 regulat | 100.0% | 2      | 100.0% | 1 | 1 | 1         | 1,931,487  | 1,577,048  | 1,443,728  | 1,681,360  | 158,173   | 172,229   | 142,588   | 169,737   | 18.3 | 24.4 | 22.1 | 22.6 | -1.2 | 0.2  | -1.3 | 0.05 | -1.1 | 0.3   | -1.1 | 0.6  | 1.1  | 0.7   | 1.2  | 0.3   |  |  |  |
| P00297452  | ARFGAP2 | SQDLFDVDTFASGPKK                                                                   | 2      | 99.9%  | 1      | 1 | 1 | 1         |            |            |            |            |           |           |           |           |      |      |      |      |      |      |      |      |      |       |      |      |      |       |      |       |  |  |  |
| P00297452  | ARFGAP2 | VSSQSSSEER                                                                         | 2      | 99.9%  | 1      | 1 | 1 | 1         |            |            |            |            |           |           |           |           |      |      |      |      |      |      |      |      |      |       |      |      |      |       |      |       |  |  |  |
| P00297452  | TFC     | Tyrosine-protein kinase receptor                                                   | 100.0% | 3      | 100.0% | 1 | 1 | 1         | 3,389,612  | 3,424,013  | 3,566,771  | 3,678,802  | 268,422   | 110,703   | 283,234   | 69,155    | 17.7 | 7.2  | 18.8 | 4.2  | 1.0  | 0.9  | -1.0 | 0.9  | 1.1  | 0.3   | -1.0 | 0.8  | 1.1  | 0.9   | 1.1  | 0.3   |  |  |  |
| P00297452  | TFC     | LLDSLEPPGEPSPINPNDYVDGREK                                                          | 3      | 100.0% | 1      | 1 | 1 | 1         |            |            |            |            |           |           |           |           |      |      |      |      |      |      |      |      |      |       |      |      |      |       |      |       |  |  |  |
| P00297452  | TFC     | LLSNDEVTIK                                                                         | 2      | 100.0% | 1      | 1 | 1 | 1         |            |            |            |            |           |           |           |           |      |      |      |      |      |      |      |      |      |       |      |      |      |       |      |       |  |  |  |
| P00297452  | TFC     | OSTDVMASAKRQKVDGDEK                                                                | 3      | 97.0%  | 1      | 1 | 1 | 1         |            |            |            |            |           |           |           |           |      |      |      |      |      |      |      |      |      |       |      |      |      |       |      |       |  |  |  |
| P00298542  | AKAP1   | cDNA FLJ35398, highly similar to A-kinase anchor protein B                         | 98.5%  | 2.2    | 2      | 2 | 2 | 2,525,785 | 2,723,605  | 2,890,345  | 2,815,665  | 144,756    | 194,179   | 199,611   | 154,958   | 11.1      | 15.9 | 15.4 | 12.3 | -1.1 | 0.4  | -1.0 | 0.9  | -1.0 | 0.6  | 1.1   | 0.6  | 1.0  | 0.7  | -1.0  | 0.8  |       |  |  |  |
| P00298542  | AKAP1   | A-kinase anchor protein B-like                                                     | 98.5%  | 2.0    | 1      | 1 | 1 | 2,525,785 | 2,723,605  | 2,890,345  | 2,815,665  | 144,756    | 194,179   | 199,611   | 154,958   | 11.1      | 15.9 | 15.4 | 12.3 | -1.1 | 0.4  | -1.0 | 0.9  | -1.0 | 0.6  | 1.1   | 0.6  | 1.0  | 0.7  | -1.0  | 0.8  |       |  |  |  |
| P00298542  | AKAP1   | QYAKRQVYVTK                                                                        | 2      | 98.5%  | 1      | 1 | 1 | 1         |            |            |            |            |           |           |           |           |      |      |      |      |      |      |      |      |      |       |      |      |      |       |      |       |  |  |  |
| P00297477  | SNRP1   | U2 small nuclear ribonucleoprotein A'                                              | 99.9%  | 10.2   | 2      | 2 | 2 | 1         | 8,973,850  | 9,023,720  | 7,877,470  | 8,983,520  | 1,071,376 | 676,411   | 445,551   | 730,042   | 26.7 | 16.7 | 12.7 | 18.3 | 1.0  | 1    | -1.1 | 0.4  | 1.0  | 1     | -1.1 | 0.2  | -1.0 | 1     | 1.1  | 0.2   |  |  |  |
| P00297477  | SNRP1   | NAUNASTLAIEVER                                                                     | 2      | 86.4%  | 1      | 1 | 1 | 1         |            |            |            |            |           |           |           |           |      |      |      |      |      |      |      |      |      |       |      |      |      |       |      |       |  |  |  |
| P00297477  | SNRP1   | ITNPGAGLTK                                                                         | 2      | 98.2%  | 1      | 1 | 1 | 1         |            |            |            |            |           |           |           |           |      |      |      |      |      |      |      |      |      |       |      |      |      |       |      |       |  |  |  |
| P00297487  | CTSH    | Cathepsin H                                                                        | 98.7%  | 3.9    | 1      | 1 | 1 | 3         | 719,707    | 693,657    | 661,197    | 728,690    | 99,174    | 21,235    | 71,433    | 21,791    | 30.8 | 6.9  | 24.2 | 6.7  | -1.0 | 0.8  | -1.1 | 0.6  | 1.0  | 0.9   | -1.0 | 0.7  | 1.1  | 0.3   | 1.1  | 0.4   |  |  |  |
| P002975428 | CTSH    | Uncharacterized protein                                                            | 98.7%  | 4.0    | 1      | 1 | 1 | 3         | 719,707    | 693,657    | 661,197    | 728,690    | 99,174    | 21,235    | 71,433    | 21,791    | 30.8 | 6.9  | 24.2 | 6.7  | -1.0 | 0.8  | -1.1 | 0.6  | 1.0  | 0.9   | -1.0 | 0.7  | 1.1  | 0.3   | 1.1  | 0.4   |  |  |  |
| P002975428 | CTSH    | Uncharacterized protein                                                            | 98.7%  | 8.7    | 1      | 1 | 1 | 3         | 719,707    | 693,657    | 661,197    | 728,690    | 99,174    | 21,235    | 71,433    | 21,791    | 30.8 | 6.9  | 24.2 | 6.7  | -1.0 | 0.8  | -1.1 | 0.6  | 1.0  | 0.9   | -1.0 | 0.7  | 1.1  | 0.3   | 1.1  | 0.4   |  |  |  |
| P00297574  | CBX3    | Chromobox protein homolog 3                                                        | 100.0% | 30.1   | 4      | 5 | 7 | 1         | 22,950,516 | 26,821,083 | 24,910,264 | 27,304,764 | 4,017,874 | 1,653,065 | 1,450,998 | 39,1      | 13.8 | 13.0 | 15.8 | 1.2  | 0.4  | 1.1  | 0.7  | 1.2  | 0.4  | -1.91 | 0.4  | 1.0  | 0.9  | 1.1   | 0.4  |       |  |  |  |
| P00297574  | CBX3    | IGATDSSEELMLRK                                                                     | 2      | 100.0% | 1      | 1 | 1 | 1         |            |            |            |            |           |           |           |           |      |      |      |      |      |      |      |      |      |       |      |      |      |       |      |       |  |  |  |
| P00297574  | CBX3    | KVVEAEPEEFVVEK                                                                     | 2      | 100.0% | 1      | 1 | 1 | 1         |            |            |            |            |           |           |           |           |      |      |      |      |      |      |      |      |      |       |      |      |      |       |      |       |  |  |  |
| P00297574  | CBX3    | KVVEAEPEEFVVEK                                                                     | 3      | 99.9%  | 1      | 1 | 1 | 1         |            |            |            |            |           |           |           |           |      |      |      |      |      |      |      |      |      |       |      |      |      |       |      |       |  |  |  |
| P00297574  | CBX3    | LTVWSSPEADK                                                                        | 2      | 100.0% | 1      | 1 | 1 | 1         |            |            |            |            |           |           |           |           |      |      |      |      |      |      |      |      |      |       |      |      |      |       |      |       |  |  |  |
| P00297574  | CBX3    | WKDSEADLVLA                                                                        | 3      | 99.9%  | 1      | 1 | 1 | 1         |            |            |            |            |           |           |           |           |      |      |      |      |      |      |      |      |      |       |      |      |      |       |      |       |  |  |  |
| P00297626  | STXB3   | Syntaxin-binding protein 3                                                         | 97.6%  | 2.9    | 1      | 1 | 1 | 1         | 604,690    | 476,746    | 567,451    | 657,401    | 35,947    | 32,826    | 41,732    | 42,123    | 13.3 | 15.4 | 16.4 | 14.3 | -1.3 | 0.03 | -1.1 | 0.5  | 1.1  | 0.4   | 1.2  | 0.1  | 1.4  | 0.01  | 1.2  | 0.2   |  |  |  |
| P00297644  | COL1A1  | Collagen alpha-1(I) chain                                                          | 92.2%  | 2.1    | 1      | 1 | 1 | 1         | 1,251,622  | 1,368,083  | 1,482,340  | 1,219,441  | 141,608   | 71,478    | 111,747   | 219,142   | 25.3 | 11.7 | 16.9 | 40.2 | 1.1  | 0.6  | 1.2  | 0.2  | -1.0 | 0.9   | 1.1  | 0.4  | -1.1 | 0.5   | -1.2 | 0.3   |  |  |  |
| P00297774  | CTCF2   | T-complex protein 1 subunit beta                                                   | 100.0% | 2      | 92.2%  | 1 | 1 | 1         | 58,037,873 | 57,755,220 | 58,176,718 | 66,079,822 | 3,900,664 | 1,490,840 | 3,718,344 | 1,801,724 | 15.0 | 5.8  | 14.3 | 6.1  | -1.0 | 0.9  | 1.0  | 1    | -1.0 | 0.1   | 1.0  | 0.9  | 1.1  | 0.007 | 1.1  | 0.09  |  |  |  |
| P00297774  | CTCF2   | AAHSEGTITAGLDMR                                                                    | 2      | 100.0% | 1      | 1 | 1 | 1         |            |            |            |            |           |           |           |           |      |      |      |      |      |      |      |      |      |       |      |      |      |       |      |       |  |  |  |
| P00297774  | CTCF2   | AAHSEGTITAGLDMR                                                                    | 3      | 95.2%  | 1      | 1 | 1 | 1         |            |            |            |            |           |           |           |           |      |      |      |      |      |      |      |      |      |       |      |      |      |       |      |       |  |  |  |
| P00297774  | CTCF2   | DASLSPFYNDKATEK                                                                    | 2      | 100.0% | 1      | 1 | 1 | 1         |            |            |            |            |           |           |           |           |      |      |      |      |      |      |      |      |      |       |      |      |      |       |      |       |  |  |  |
| P00297774  | CTCF2   | EGTGDMAALGRTEQVVK                                                                  | 2      | 100.0% | 1      | 1 | 1 | 1         |            |            |            |            |           |           |           |           |      |      |      |      |      |      |      |      |      |       |      |      |      |       |      |       |  |  |  |
| P00297774  | CTCF2   | FRGDMAINGITLSSK                                                                    | 3      | 99.9%  | 1      | 1 | 1 | 1         |            |            |            |            |           |           |           |           |      |      |      |      |      |      |      |      |      |       |      |      |      |       |      |       |  |  |  |
| P00297774  | CTCF2   | GATVQGLDNEK                                                                        | 2      | 100.0% | 1</    |   |   |           |            |            |            |            |           |           |           |           |      |      |      |      |      |      |      |      |      |       |      |      |      |       |      |       |  |  |  |





































|             |                 |                                                                      |        |      |        |   |    |            |            |            |            |            |           |           |           |           |      |      |      |      |      |      |      |      |      |      |      |      |     |      |      |      |  |  |  |
|-------------|-----------------|----------------------------------------------------------------------|--------|------|--------|---|----|------------|------------|------------|------------|------------|-----------|-----------|-----------|-----------|------|------|------|------|------|------|------|------|------|------|------|------|-----|------|------|------|--|--|--|
| P00010693   | SERP1           | SERPINE1 mRNA binding protein 1, isoform CRA_d                       | 100.0% | 20.0 | 5      | 5 | 6  | 2          | 4,069.215  | 4,166.499  | 4,011.732  | 4,385.854  | 266.444   | 64.135    | 200.501   | 135.276   | 14.6 | 3.4  | 11.2 | 6.9  | 1.0  | 0.7  | -1.0 | 0.9  | 1.1  | 0.3  | -1.0 | 0.5  | 1.1 | 0.2  | 1.1  | 0.2  |  |  |  |
| P00010497   | SERP1           | isoform 2 of Plasminogen activator inhibitor 1 RNA-binding protein   | 100.0% | 23.1 | 5      | 5 | 6  | 2          | 4,069.215  | 4,166.499  | 4,011.732  | 4,385.854  | 266.444   | 64.135    | 200.501   | 135.276   | 14.6 | 3.4  | 11.2 | 6.9  | 1.0  | 0.7  | -1.0 | 0.9  | 1.1  | 0.3  | -1.0 | 0.5  | 1.1 | 0.2  | 1.1  | 0.2  |  |  |  |
|             |                 | EAGGGVGGVGGGAKAQAQAQNSNAAGK                                          |        | 3    | 83.9%  | 1 |    |            |            |            |            |            |           |           |           |           |      |      |      |      |      |      |      |      |      |      |      |      |     |      |      |      |  |  |  |
|             |                 | LETPPPVALLK                                                          |        | 2    | 100.0% | 2 |    |            |            |            |            |            |           |           |           |           |      |      |      |      |      |      |      |      |      |      |      |      |     |      |      |      |  |  |  |
|             |                 | FQQLFDESDPFVLK                                                       |        | 2    | 100.0% | 2 |    |            |            |            |            |            |           |           |           |           |      |      |      |      |      |      |      |      |      |      |      |      |     |      |      |      |  |  |  |
|             |                 | KPANDTSSGLENVDFQK                                                    |        | 3    | 99.1%  | 1 |    |            |            |            |            |            |           |           |           |           |      |      |      |      |      |      |      |      |      |      |      |      |     |      |      |      |  |  |  |
|             |                 | SSAKAPVDYDPAFLA                                                      |        | 3    | 99.4%  | 1 |    |            |            |            |            |            |           |           |           |           |      |      |      |      |      |      |      |      |      |      |      |      |     |      |      |      |  |  |  |
| P000410714  | HBA1/HBA2       | Hemoglobin subunit alpha                                             | 100.0% | 26.2 | 3      | 4 | 4  | 1          | 24,264.900 | 23,575.375 | 24,353.115 | 29,026.685 | 2,108.008 | 1,211.623 | 1,055.027 | 1,284.365 | 19.4 | 11.5 | 9.7  | 9.9  | -1.0 | 0.8  | 1.0  | 1.1  | 1.2  | 0.9  | 1.0  | 0.6  | 1.2 | 0.01 | 1.2  | 0.02 |  |  |  |
|             |                 | LVDFVYK                                                              |        | 3    | 100.0% | 3 |    |            |            |            |            |            |           |           |           |           |      |      |      |      |      |      |      |      |      |      |      |      |     |      |      |      |  |  |  |
|             |                 | TYFPHLDRKRSQVYK                                                      |        | 3    | 100.0% | 1 |    |            |            |            |            |            |           |           |           |           |      |      |      |      |      |      |      |      |      |      |      |      |     |      |      |      |  |  |  |
|             |                 | VGAHAGEVGAELER                                                       |        | 2    | 100.0% | 1 |    |            |            |            |            |            |           |           |           |           |      |      |      |      |      |      |      |      |      |      |      |      |     |      |      |      |  |  |  |
|             |                 | VGAHAGEVGAELER                                                       |        | 3    | 99.9%  | 1 |    |            |            |            |            |            |           |           |           |           |      |      |      |      |      |      |      |      |      |      |      |      |     |      |      |      |  |  |  |
| P000411389  | ACLS5           | cDNA FLJ25792, highly similar to Long-chain-fatty-acyl-CoA ligase 5  | 100.0% | 19   | 2      | 2 | 1  | 3,083.220  | 3,034.948  | 2,964.503  | 3,494.280  | 233.614    | 157.720   | 217.845   | 158.885   | 16.9      | 11.6 | 16.4 | 10.2 | -1.0 | 0.9  | -1.0 | 1.1  | 0.2  | -1.0 | 0.8  | 1.2  | 0.7  | 1.2 | 0.09 |      |      |  |  |  |
|             |                 | SSLVGVVWRDVLSPFAK                                                    |        | 2    | 100.0% | 1 |    |            |            |            |            |            |           |           |           |           |      |      |      |      |      |      |      |      |      |      |      |      |     |      |      |      |  |  |  |
|             |                 | TQKIVYENGD                                                           |        | 2    | 100.0% | 1 |    |            |            |            |            |            |           |           |           |           |      |      |      |      |      |      |      |      |      |      |      |      |     |      |      |      |  |  |  |
| P000411638Z | SNORA6/RPSA1P   | Laminin receptor-like protein LAMRL5                                 | 100.0% | 26.8 | 5      | 6 | 10 | 1          | 8,112.808  | 8,653.241  | 8,429.394  | 9,746.644  | 676.542   | 277.208   | 602.836   | 230.602   | 18.7 | 12.4 | 16.0 | 5.3  | 1.1  | 0.5  | 1.0  | 0.7  | 1.2  | 0.7  | -1.0 | 0.7  | 1.1 | 0.02 | 1.2  | 6.1  |  |  |  |
|             |                 | ANAENAPDVYSISR                                                       |        | 2    | 100.0% | 2 |    |            |            |            |            |            |           |           |           |           |      |      |      |      |      |      |      |      |      |      |      |      |     |      |      |      |  |  |  |
|             |                 | FAAKTGTATKSR                                                         |        | 2    | 100.0% | 2 |    |            |            |            |            |            |           |           |           |           |      |      |      |      |      |      |      |      |      |      |      |      |     |      |      |      |  |  |  |
|             |                 | FLAGHLGGTLNDFQMEQYIK                                                 |        | 3    | 100.0% | 1 |    |            |            |            |            |            |           |           |           |           |      |      |      |      |      |      |      |      |      |      |      |      |     |      |      |      |  |  |  |
|             |                 | FFPRFTNQIQAMFR                                                       |        | 2    | 100.0% | 2 |    |            |            |            |            |            |           |           |           |           |      |      |      |      |      |      |      |      |      |      |      |      |     |      |      |      |  |  |  |
|             |                 | KSDGIYINK                                                            |        | 2    | 99.9%  | 2 |    |            |            |            |            |            |           |           |           |           |      |      |      |      |      |      |      |      |      |      |      |      |     |      |      |      |  |  |  |
|             |                 | KSDGIYINK                                                            |        | 3    | 99.3%  | 1 |    |            |            |            |            |            |           |           |           |           |      |      |      |      |      |      |      |      |      |      |      |      |     |      |      |      |  |  |  |
| P000411680  | PCMT1           | isoform 1 of Protein-L-isoaspartate(D-aspartate) O-methyltransferase | 100.0% | 35.7 | 7      | 7 | 3  | 12,778.588 | 14,205.860 | 12,844.821 | 14,471.835 | 955.954    | 948.534   | 616.630   | 369.589   | 15.9      | 14.9 | 10.7 | 5.7  | 1.1  | 0.3  | 1.0  | 1.1  | 1.1  | 0.1  | -1.1 | 0.3  | 1.0  | 0.8 | 1.1  | 0.05 |      |  |  |  |
| P00053118   | PCMT1           | Uncharacterized protein                                              | 100.0% | 29.3 | 7      | 7 | 3  | 12,778.588 | 14,205.860 | 12,844.821 | 14,471.835 | 955.954    | 948.534   | 616.630   | 369.589   | 15.9      | 14.9 | 10.7 | 5.7  | 1.1  | 0.3  | 1.0  | 1.1  | 1.1  | 0.1  | -1.1 | 0.3  | 1.0  | 0.8 | 1.1  | 0.05 |      |  |  |  |
| P00047458   | PCMT1           | protein-L-isoaspartate(D-aspartate) O-methyltransferase              | 100.0% | 29.4 | 7      | 7 | 3  | 12,778.588 | 14,205.860 | 12,844.821 | 14,471.835 | 955.954    | 948.534   | 616.630   | 369.589   | 15.9      | 14.9 | 10.7 | 5.7  | 1.1  | 0.3  | 1.0  | 1.1  | 0.1  | -1.1 | 0.3  | 1.0  | 0.8  | 1.1 | 0.05 |      |      |  |  |  |
|             |                 | ELVDSVNVNR                                                           |        | 2    | 99.9%  | 1 |    |            |            |            |            |            |           |           |           |           |      |      |      |      |      |      |      |      |      |      |      |      |     |      |      |      |  |  |  |
|             |                 | KDQPTLLSSGR                                                          |        | 2    | 99.8%  | 1 |    |            |            |            |            |            |           |           |           |           |      |      |      |      |      |      |      |      |      |      |      |      |     |      |      |      |  |  |  |
|             |                 | LLPLVPGAGGNMLEGDYK                                                   |        | 2    | 99.9%  | 1 |    |            |            |            |            |            |           |           |           |           |      |      |      |      |      |      |      |      |      |      |      |      |     |      |      |      |  |  |  |
|             |                 | LLPLVPGAGGNMLEGDYKLOGSIK                                             |        | 3    | 94.8%  | 1 |    |            |            |            |            |            |           |           |           |           |      |      |      |      |      |      |      |      |      |      |      |      |     |      |      |      |  |  |  |
|             |                 | SGGASHSEINLEK                                                        |        | 3    | 97.6%  | 1 |    |            |            |            |            |            |           |           |           |           |      |      |      |      |      |      |      |      |      |      |      |      |     |      |      |      |  |  |  |
|             |                 | VFEVLATDR                                                            |        | 2    | 96.8%  | 1 |    |            |            |            |            |            |           |           |           |           |      |      |      |      |      |      |      |      |      |      |      |      |     |      |      |      |  |  |  |
|             |                 | VVLVVDGR                                                             |        | 2    | 99.9%  | 1 |    |            |            |            |            |            |           |           |           |           |      |      |      |      |      |      |      |      |      |      |      |      |     |      |      |      |  |  |  |
| P000411768  | ESD             | S-formylglutathione hydrolase                                        | 100.0% | 12.4 | 2      | 2 | 1  | 2,561.563  | 2,465.362  | 2,866.612  | 2,667.739  | 130.919    | 287.168   | 153.037   | 285.028   | 10.8      | 26.1 | 11.8 | 23.9 | -1.0 | 0.8  | 1.1  | 0.1  | 1.0  | 0.7  | 1.2  | 0.2  | 1.3  | 0.6 | -1.1 | 0.6  |      |  |  |  |
|             |                 | AFSGYLTDQSK                                                          |        | 2    | 98.0%  | 1 |    |            |            |            |            |            |           |           |           |           |      |      |      |      |      |      |      |      |      |      |      |      |     |      |      |      |  |  |  |
|             |                 | MYSVYTELTPQLNANFVDPGR                                                |        | 2    | 99.9%  | 1 |    |            |            |            |            |            |           |           |           |           |      |      |      |      |      |      |      |      |      |      |      |      |     |      |      |      |  |  |  |
|             |                 | SAVGEAMDSK                                                           |        | 4    | 100.0% | 1 |    |            |            |            |            |            |           |           |           |           |      |      |      |      |      |      |      |      |      |      |      |      |     |      |      |      |  |  |  |
|             |                 | SAVGEAMDSK                                                           |        | 2    | 100.0% | 2 |    |            |            |            |            |            |           |           |           |           |      |      |      |      |      |      |      |      |      |      |      |      |     |      |      |      |  |  |  |
|             |                 | SAVGEAMDSK                                                           |        | 3    | 97.6%  | 1 |    |            |            |            |            |            |           |           |           |           |      |      |      |      |      |      |      |      |      |      |      |      |     |      |      |      |  |  |  |
|             |                 | TFDEAMADLHLSDESK                                                     |        | 2    | 100.0% | 1 |    |            |            |            |            |            |           |           |           |           |      |      |      |      |      |      |      |      |      |      |      |      |     |      |      |      |  |  |  |
|             |                 | YLAIVATGDK                                                           |        | 2    | 100.0% | 1 |    |            |            |            |            |            |           |           |           |           |      |      |      |      |      |      |      |      |      |      |      |      |     |      |      |      |  |  |  |
| P000411931  | RDB6.SNORD110.N | Nuclear protein 56                                                   | 93.8%  | 1    | 1      | 1 | 3  | 541.993    | 499.146    | 475.999    | 522.773    | 61.939     | 36.392    | 43.093    | 37.947    | 25.6      | 16.3 | 20.2 | 16.2 | -1.1 | 0.6  | -1.1 | 0.4  | -1.0 | 0.8  | -1.0 | 0.7  | 1.0  | 0.7 | 1.1  | 0.4  |      |  |  |  |
| P0004269    | RDB6.SNORD110.N | Uncharacterized protein                                              | 93.8%  | 5.8  | 1      | 1 | 3  | 541.993    | 499.146    | 475.999    | 522.773    | 61.939     | 36.392    | 43.093    | 37.947    | 25.6      | 16.3 | 20.2 | 16.2 | -1.1 | 0.6  | -1.1 | 0.4  | -1.0 | 0.8  | -1.0 | 0.7  | 1.0  | 0.7 | 1.1  | 0.4  |      |  |  |  |
| P00096452   | RDB6.SNORD110.N | Protein                                                              | 93.8%  | 5.8  | 1      | 1 | 3  | 541.993    | 499.146    | 475.999    | 522.773    | 61.939     | 36.392    | 43.093    | 37.947    | 25.6      | 16.3 | 20.2 | 16.2 | -1.1 | 0.6  | -1.1 | 0.4  | -1.0 | 0.8  | -1.0 | 0.7  | 1.0  | 0.7 | 1.1  | 0.4  |      |  |  |  |
|             |                 | YPASIVYDIAEK                                                         |        | 2    | 93.8%  | 1 |    |            |            |            |            |            |           |           |           |           |      |      |      |      |      |      |      |      |      |      |      |      |     |      |      |      |  |  |  |
| P000412153  | 10-Sep          | Uncharacterized protein                                              | 100.0% | 6.6  | 1      | 1 | 1  | 1,066.629  | 903.294    | 1,036.426  | 1,092.224  | 99.961     | 49.994    | 63.121    | 13.610    | 21.4      | 13.6 | 2.8  | -1.2 | 0.2  | -1.0 | 0.8  | 1.1  | 0.1  | 1.1  | 0.1  | 1.2  | 0.02 | 1.1 | 0.4  |      |      |  |  |  |
|             |                 | VNMAAGNGLPFLVSDMEVK                                                  |        | 2    | 98.9%  | 1 |    |            |            |            |            |            |           |           |           |           |      |      |      |      |      |      |      |      |      |      |      |      |     |      |      |      |  |  |  |
| P000412146  | VPS13C          | vacuolar protein sorting-associated protein 13C isoform 2B           | 99.6%  | 1.2  | 2      | 2 | 4  | 14,443.905 | 16,353.540 | 16,540.760 | 18,741.268 | 3,679.912  | 2,050.517 | 2,320.774 | 1,334.010 | 57.0      | 28.0 | 31.4 | 15.9 | 1.1  | 0.7  | 1.1  | 0.6  | 1.3  | 0.3  | 1.0  | 1.1  | 1.1  | 0.4 | 1.1  | 0.4  |      |  |  |  |
| P00045428   | VPS13C          | isoform 1 of Vacuolar protein sorting-associated protein 13C         | 99.6%  | 1.2  | 2      | 2 | 4  | 14,443.905 | 16,353.540 | 16,540.760 | 18,741.268 | 3,679.912  | 2,050.517 | 2,320.774 | 1,334.010 | 57.0      | 28.0 | 31.4 | 15.9 | 1.1  | 0.7  | 1.1  | 0.6  | 1.3  | 0.3  | 1.0  | 1.1  | 1.1  | 0.4 | 1.1  | 0.4  |      |  |  |  |
| P00064778   | VPS13C          | vacuolar protein sorting-associated protein 13C isoform 1B           | 99.6%  | 1.2  | 2      | 2 | 4  | 14,443.905 | 16,353.540 | 16,540.760 | 18,741.268 | 3,679.912  | 2,050.517 | 2,320.774 | 1,334.010 | 57.0      | 28.0 | 31.4 | 15.9 | 1.1  | 0.7  | 1.1  | 0.6  |      |      |      |      |      |     |      |      |      |  |  |  |











|            |         |                                                                                                      |        |                       |    |        |    |   |            |            |            |            |           |           |           |           |      |      |      |      |      |     |      |     |      |      |      |      |      |      |      |      |      |     |      |      |      |     |  |
|------------|---------|------------------------------------------------------------------------------------------------------|--------|-----------------------|----|--------|----|---|------------|------------|------------|------------|-----------|-----------|-----------|-----------|------|------|------|------|------|-----|------|-----|------|------|------|------|------|------|------|------|------|-----|------|------|------|-----|--|
| P00064620  | NCL     | Nucleolin                                                                                            | 100.0% | 27.9                  | 17 | 22     | 33 | 2 | 68,214.64  | 70,011.96  | 69,022.32  | 78,214.60  | 7,177.592 | 2,914.895 | 4,553.034 | 2,886.369 | 23.5 | 9.3  | 14.8 | 8.3  | 1.0  | 0.8 | 1.0  | 0.9 | 1.1  | 0.2  | -1.0 | 0.9  | 1.1  | 0.08 | 1.1  | 0.1  | 0.1  |     |      |      |      |     |  |
|            |         |                                                                                                      |        | ALETGLX               | 2  | 89.7%  | 1  |   |            |            |            |            |           |           |           |           |      |      |      |      |      |     |      |     |      |      |      |      |      |      |      |      |      |     |      |      |      |     |  |
|            |         |                                                                                                      |        | EMAGEGGDQKYLWVWPK     | 3  | 100.0% | 2  |   |            |            |            |            |           |           |           |           |      |      |      |      |      |     |      |     |      |      |      |      |      |      |      |      |      |     |      |      |      |     |  |
|            |         |                                                                                                      |        | EVREDAER              | 2  | 100.0% | 2  |   |            |            |            |            |           |           |           |           |      |      |      |      |      |     |      |     |      |      |      |      |      |      |      |      |      |     |      |      |      |     |  |
|            |         |                                                                                                      |        | FGYVDFSAEDLEK         | 2  | 100.0% | 2  |   |            |            |            |            |           |           |           |           |      |      |      |      |      |     |      |     |      |      |      |      |      |      |      |      |      |     |      |      |      |     |  |
|            |         |                                                                                                      |        | GFQVDFNSLEDAK         | 2  | 100.0% | 3  |   |            |            |            |            |           |           |           |           |      |      |      |      |      |     |      |     |      |      |      |      |      |      |      |      |      |     |      |      |      |     |  |
|            |         |                                                                                                      |        | GVNTEK                | 2  | 97.0%  | 1  |   |            |            |            |            |           |           |           |           |      |      |      |      |      |     |      |     |      |      |      |      |      |      |      |      |      |     |      |      |      |     |  |
|            |         |                                                                                                      |        | GLSEDTTEYLK           | 2  | 100.0% | 1  |   |            |            |            |            |           |           |           |           |      |      |      |      |      |     |      |     |      |      |      |      |      |      |      |      |      |     |      |      |      |     |  |
|            |         |                                                                                                      |        | GLSEDTTETLKEKESQVSR   | 2  | 100.0% | 2  |   |            |            |            |            |           |           |           |           |      |      |      |      |      |     |      |     |      |      |      |      |      |      |      |      |      |     |      |      |      |     |  |
|            |         |                                                                                                      |        | GLSEDTTETLKEKESQVSR   | 3  | 100.0% | 1  |   |            |            |            |            |           |           |           |           |      |      |      |      |      |     |      |     |      |      |      |      |      |      |      |      |      |     |      |      |      |     |  |
|            |         |                                                                                                      |        | GVYVDFSAEDLEK         | 2  | 100.0% | 2  |   |            |            |            |            |           |           |           |           |      |      |      |      |      |     |      |     |      |      |      |      |      |      |      |      |      |     |      |      |      |     |  |
|            |         |                                                                                                      |        | KFYVDFSAEDLEK         | 2  | 100.0% | 1  |   |            |            |            |            |           |           |           |           |      |      |      |      |      |     |      |     |      |      |      |      |      |      |      |      |      |     |      |      |      |     |  |
|            |         |                                                                                                      |        | KFYVDFSAEDLEK         | 3  | 100.0% | 1  |   |            |            |            |            |           |           |           |           |      |      |      |      |      |     |      |     |      |      |      |      |      |      |      |      |      |     |      |      |      |     |  |
|            |         |                                                                                                      |        | KSLLYTIQEK            | 2  | 95.2%  | 1  |   |            |            |            |            |           |           |           |           |      |      |      |      |      |     |      |     |      |      |      |      |      |      |      |      |      |     |      |      |      |     |  |
|            |         |                                                                                                      |        | TEADNDTFREK           | 2  | 100.0% | 1  |   |            |            |            |            |           |           |           |           |      |      |      |      |      |     |      |     |      |      |      |      |      |      |      |      |      |     |      |      |      |     |  |
|            |         |                                                                                                      |        | TGSDVFAK              | 2  | 100.0% | 1  |   |            |            |            |            |           |           |           |           |      |      |      |      |      |     |      |     |      |      |      |      |      |      |      |      |      |     |      |      |      |     |  |
|            |         |                                                                                                      |        | TLVLSLSYSSTAEVLEQVEFK | 2  | 100.0% | 2  |   |            |            |            |            |           |           |           |           |      |      |      |      |      |     |      |     |      |      |      |      |      |      |      |      |      |     |      |      |      |     |  |
|            |         |                                                                                                      |        | TLVLSLSYSSTAEVLEQVEFK | 3  | 100.0% | 1  |   |            |            |            |            |           |           |           |           |      |      |      |      |      |     |      |     |      |      |      |      |      |      |      |      |      |     |      |      |      |     |  |
|            |         |                                                                                                      |        | VEGTEPTAFNLFVGNLNFNK  | 2  | 100.0% | 1  |   |            |            |            |            |           |           |           |           |      |      |      |      |      |     |      |     |      |      |      |      |      |      |      |      |      |     |      |      |      |     |  |
|            |         |                                                                                                      |        | VEGTEPTAFNLFVGNLNFNK  | 3  | 100.0% | 1  |   |            |            |            |            |           |           |           |           |      |      |      |      |      |     |      |     |      |      |      |      |      |      |      |      |      |     |      |      |      |     |  |
|            |         |                                                                                                      |        | VFQKNEK               | 1  | 98.3%  | 1  |   |            |            |            |            |           |           |           |           |      |      |      |      |      |     |      |     |      |      |      |      |      |      |      |      |      |     |      |      |      |     |  |
|            |         |                                                                                                      |        | VTQDELKVFEDAIEK       | 2  | 100.0% | 2  |   |            |            |            |            |           |           |           |           |      |      |      |      |      |     |      |     |      |      |      |      |      |      |      |      |      |     |      |      |      |     |  |
|            |         |                                                                                                      |        | VTQDELKVFEDAIEK       | 3  | 100.0% | 2  |   |            |            |            |            |           |           |           |           |      |      |      |      |      |     |      |     |      |      |      |      |      |      |      |      |      |     |      |      |      |     |  |
| P00044452  | MOV10   | isoform 1 of Putative helicase MOV10                                                                 | 96.9%  |                       |    |        |    | 2 | 1,958.335  | 1,748.460  | 1,761.295  | 1,945.785  | 118.246   | 177.077   | 107.792   | 210.698   | 13.8 | 22.7 | 13.7 | 24.2 | -1.1 | 0.4 | -1.3 | 0.3 | -1.0 | 1.0  | 1.0  | 1.1  | 0.5  | 1.1  | 0.5  | 1.1  | 0.5  | 1.1 | 0.5  | 1.1  | 0.5  |     |  |
| P00044488  | MOV10   | MOV10, Motoneur leukemia virus 10, homolog (Mouse), isoform CRA_a                                    | 96.9%  |                       |    |        |    | 2 | 1,958.335  | 1,748.460  | 1,761.295  | 1,945.785  | 118.246   | 177.077   | 107.792   | 210.698   | 13.8 | 22.7 | 13.7 | 24.2 | -1.1 | 0.4 | -1.3 | 0.3 | -1.0 | 1.0  | 1.0  | 1.1  | 0.5  | 1.1  | 0.5  | 1.1  | 0.5  | 1.1 | 0.5  | 1.1  | 0.5  |     |  |
|            |         |                                                                                                      |        | EEGGSLGSLQPEVWR       | 2  | 96.9%  | 1  |   |            |            |            |            |           |           |           |           |      |      |      |      |      |     |      |     |      |      |      |      |      |      |      |      |      |     |      |      |      |     |  |
| P00044574  | SH3BP1  | cDNA FLJ48225, clone BRAMY3014813, highly similar to Homo sapiens SH3-domain uncharacterized protein | 95.9%  |                       |    |        |    | 1 | 9,694.460  | 9,755.780  | 8,755.240  | 10,360.660 | 759.145   | 727.285   | 438.908   | 399.025   | 17.5 | 16.7 | 11.2 | 8.7  | 1.0  | 1.1 | -1.1 | 0.3 | -1.1 | 0.5  | -1.1 | 0.3  | 1.1  | 0.5  | -1.1 | 0.3  | 1.1  | 0.5 | -1.1 | 0.3  | 1.1  | 0.5 |  |
| P00045474  | SH3BP1  | isoform 1 of SH3 domain-binding protein 1                                                            | 95.9%  |                       |    |        |    | 1 | 9,694.460  | 9,755.780  | 8,755.240  | 10,360.660 | 759.145   | 727.285   | 438.908   | 399.025   | 17.5 | 16.7 | 11.2 | 8.7  | 1.0  | 1.1 | -1.1 | 0.3 | -1.1 | 0.5  | -1.1 | 0.3  | 1.1  | 0.5  | -1.1 | 0.3  | 1.1  | 0.5 | -1.1 | 0.3  | 1.1  | 0.5 |  |
| P00045474  | SH3BP1  | cDNA FLJ18332, highly similar to SH3 domain-binding protein 1                                        | 95.9%  |                       |    |        |    | 5 | 9,694.460  | 9,755.780  | 8,755.240  | 10,360.660 | 759.145   | 727.285   | 438.908   | 399.025   | 17.5 | 16.7 | 11.2 | 8.7  | 1.0  | 1.1 | -1.1 | 0.3 | -1.1 | 0.5  | -1.1 | 0.3  | 1.1  | 0.5  | -1.1 | 0.3  | 1.1  | 0.5 | -1.1 | 0.3  | 1.1  | 0.5 |  |
| P01011493  | SH3BP1  | isoform 2 of SH3 domain-binding protein 1                                                            | 95.9%  |                       |    |        |    | 1 | 9,694.460  | 9,755.780  | 8,755.240  | 10,360.660 | 759.145   | 727.285   | 438.908   | 399.025   | 17.5 | 16.7 | 11.2 | 8.7  | 1.0  | 1.1 | -1.1 | 0.3 | -1.1 | 0.5  | -1.1 | 0.3  | 1.1  | 0.5  | -1.1 | 0.3  | 1.1  | 0.5 | -1.1 | 0.3  | 1.1  | 0.5 |  |
|            |         |                                                                                                      |        | LPENSLR               | 2  | 95.9%  | 1  |   |            |            |            |            |           |           |           |           |      |      |      |      |      |     |      |     |      |      |      |      |      |      |      |      |      |     |      |      |      |     |  |
| P000444873 | DNM2    | cDNA FLJ43070, clone THYM12020959, highly similar to Duxin-2                                         | 100.0% |                       |    |        |    | 1 | 17,022.651 | 17,055.163 | 17,530.884 | 19,813.67  | 170.129   | 916.448   | 1,623.669 | 733.668   | 23.0 | 12.0 | 20.7 | 8.3  | 1.0  | 1.0 | 0.8  | 1.2 | 0.2  | 1.0  | 0.8  | 1.2  | 0.6  | 1.1  | 0.2  | 1.0  | 0.8  | 1.2 | 0.6  | 1.1  | 0.2  | 1.0 |  |
|            |         |                                                                                                      |        | NLVDVVAINK            | 2  | 100.0% | 1  |   |            |            |            |            |           |           |           |           |      |      |      |      |      |     |      |     |      |      |      |      |      |      |      |      |      |     |      |      |      |     |  |
|            |         |                                                                                                      |        | TIMLMMINKT            | 2  | 100.0% | 2  |   |            |            |            |            |           |           |           |           |      |      |      |      |      |     |      |     |      |      |      |      |      |      |      |      |      |     |      |      |      |     |  |
| P000445108 | KARS    | Uncharacterized protein                                                                              | 100.0% |                       |    |        |    | 1 | 4,545.053  | 4,249.627  | 4,088.501  | 4,577.110  | 521.795   | 137.680   | 365.253   | 147.200   | 25.7 | 7.2  | 20.0 | 7.2  | -1.1 | 0.6 | -1.1 | 0.5 | 1.0  | 1.0  | 1.1  | -1.0 | 0.7  | 1.1  | 0.1  | -1.0 | 0.7  | 1.1 | 0.1  | -1.0 | 0.7  | 1.1 |  |
|            |         |                                                                                                      |        | LPENLFEETREK          | 3  | 100.0% | 1  |   |            |            |            |            |           |           |           |           |      |      |      |      |      |     |      |     |      |      |      |      |      |      |      |      |      |     |      |      |      |     |  |
|            |         |                                                                                                      |        | MVLVGGISR             | 2  | 98.8%  | 1  |   |            |            |            |            |           |           |           |           |      |      |      |      |      |     |      |     |      |      |      |      |      |      |      |      |      |     |      |      |      |     |  |
|            |         |                                                                                                      |        | TGLDLSNFKR            | 2  | 100.0% | 2  |   |            |            |            |            |           |           |           |           |      |      |      |      |      |     |      |     |      |      |      |      |      |      |      |      |      |     |      |      |      |     |  |
| P000445152 | C10orf4 | isoform 2 of Uncharacterized protein C10orf4                                                         | 97.0%  |                       |    |        |    | 1 | 2,654.990  | 3,466.240  | 2,889.170  | 3,279.640  | 321.367   | 260.963   | 306.158   | 201.287   | 27.1 | 16.2 | 22.9 | 13.7 | 1.3  | 0.1 | 1.1  | 0.5 | 1.2  | 0.1  | -1.2 | 0.3  | -1.1 | 0.6  | 1.1  | 0.5  | 1.2  | 0.1 | -1.2 | 0.3  | -1.1 | 0.6 |  |
| P000445412 | PPR191B | cDNA FLJ43925, clone YEST1401255, weakly similar to Tumor suppressor p53                             | 92.5%  |                       |    |        |    | 1 | 3,482.620  | 3,409.330  | 4,263.690  | 3,478.330  | 292.838   | 319.045   | 107.515   | 191.675   | 16.9 | 20.9 | 5.6  | 12.3 | -1.0 | 0.9 | 1.2  | 0.3 | -1.0 | 1.1  | 0.3  | 1.0  | 0.9  | 1.0  | 0.9  | 1.0  | 0.9  | 1.0 | 0.9  | 1.0  | 0.9  | 1.0 |  |
|            |         |                                                                                                      |        | EPEQDGAAPAGPTR        | 3  | 92.5%  | 1  |   |            |            |            |            |           |           |           |           |      |      |      |      |      |     |      |     |      |      |      |      |      |      |      |      |      |     |      |      |      |     |  |
| P000445718 | GFR3    | isoform 1 of GDNF family receptor alpha-3                                                            | 96.6%  |                       |    |        |    | 1 | 773.380    | 846.740    | 806.615    | 981.880    | 63.789    | 12.103    | 80.489    | 39.357    | 18.4 | 3.2  | 22.3 | 9.0  | 1.1  | 0.3 | 1.0  | 0.8 | 1.3  | 0.02 | -1.1 | 0.6  | 1.2  | 0.3  | 1.0  | 1.2  | 0.3  | 1.0 | 1.2  | 0.3  | 1.0  |     |  |
| P000457171 | GFR3    | isoform 2 of GDNF family receptor alpha-3                                                            | 96.6%  |                       |    |        |    | 2 | 773.380    | 846.740    | 806.615    | 981.880    | 63.789    | 12.103    | 80.489    | 39.357    | 18.4 | 3.2  | 22.3 | 9.0  | 1.1  | 0.3 | 1.0  | 0.8 | 1.3  | 0.02 | -1.1 | 0.6  | 1.2  | 0.3  | 1.0  | 1.2  | 0.3  | 1.0 | 1.2  | 0.3  | 1.0  |     |  |
|            |         |                                                                                                      |        | LCSFPLCR              | 2  | 96.6%  | 1  |   |            |            |            |            |           |           |           |           |      |      |      |      |      |     |      |     |      |      |      |      |      |      |      |      |      |     |      |      |      |     |  |
| P000446140 | CAPN2   | cDNA FLJ42781, clone BRAHW00302574, highly similar to Caplan 2, large                                | 100.0% |                       |    |        |    | 1 | 252.871    | 229.556    | 272.398    | 308.661    | 21.172    | 22.312    | 21.657    | 12.880    | 18.4 | 21.7 | 17.8 | 9.3  | -1.1 | 0.5 | 1.5  | 1.2 | 0.09 | 1.2  | 0.2  | 1.3  | 0.02 | 1.1  | 0.2  | 1.3  | 0.02 | 1.1 | 0.2  | 1.3  | 0.02 | 1.1 |  |
|            |         |                                                                                                      |        | LFAQAGLGEDEISEL       |    |        |    |   |            |            |            |            |           |           |           |           |      |      |      |      |      |     |      |     |      |      |      |      |      |      |      |      |      |     |      |      |      |     |  |

























|           |                |                                                                                    |        |        |    |    |    |         |            |            |            |            |           |           |            |           |      |      |      |      |      |      |      |     |      |      |      |      |      |       |      |      |  |  |  |  |
|-----------|----------------|------------------------------------------------------------------------------------|--------|--------|----|----|----|---------|------------|------------|------------|------------|-----------|-----------|------------|-----------|------|------|------|------|------|------|------|-----|------|------|------|------|------|-------|------|------|--|--|--|--|
| PR0040468 | PRDX4          | Uncharacterized protein                                                            | 100.0% | 10.2   | 1  | 1  | 1  | 1       | 5,394,435  | 4,598,856  | 6,300,640  | 4,758,830  | 342,573   | 324,098   | 423,957    | 311,957   | 14.2 | 15.8 | 15.0 | 14.7 | -1.2 | 0.1  | 1.2  | 0.1 | -1.1 | 0.2  | 1.4  | 0.01 | 1.0  | 0.7   | -1.3 | 0.02 |  |  |  |  |
| PR0040470 | XPO5           | Exportin-5                                                                         | 96.4%  | 11     | 1  | 1  | 1  | 1       | 21,550,600 | 27,649,900 | 21,890,800 | 29,959,100 | 1,985,054 | 2,428,004 | 3,248,079  | 1,896,115 | 20.6 | 19.6 | 33.2 | 14.1 | 1.3  | 0.09 | 1.0  | 0.9 | 1.4  | 0.02 | -1.3 | 0.2  | 1.1  | 0.5   | 1.4  | 0.06 |  |  |  |  |
| PR0040471 | PRDX1          | 19 kDa protein                                                                     | 100.0% | 19     | 12 | 12 | 18 | 1       | 57,093,327 | 56,642,052 | 55,853,601 | 62,662,159 | 3,802,470 | 5,111,198 | 12,711,702 | 2,610,316 | 14.9 | 9.9  | 10.9 | 9.3  | -1.0 | 0.9  | -1.0 | 0.8 | 1.1  | 0.3  | -1.0 | 0.8  | 1.1  | 0.1   | 1.1  | 0.1  |  |  |  |  |
|           |                | ATATKGGGDK                                                                         | 2      | 100.0% | 2  |    |    |         |            |            |            |            |           |           |            |           |      |      |      |      |      |      |      |     |      |      |      |      |      |       |      |      |  |  |  |  |
|           |                | IVLSDYK                                                                            | 1      | 98.4%  | 1  |    |    |         |            |            |            |            |           |           |            |           |      |      |      |      |      |      |      |     |      |      |      |      |      |       |      |      |  |  |  |  |
|           |                | GLFDDK                                                                             | 2      | 100.0% | 2  |    |    |         |            |            |            |            |           |           |            |           |      |      |      |      |      |      |      |     |      |      |      |      |      |       |      |      |  |  |  |  |
|           |                | GVFEDKGLR                                                                          | 2      | 98.7%  | 1  |    |    |         |            |            |            |            |           |           |            |           |      |      |      |      |      |      |      |     |      |      |      |      |      |       |      |      |  |  |  |  |
|           |                | KQGGSPINPLVSDPK                                                                    | 3      | 99.6%  | 3  |    |    |         |            |            |            |            |           |           |            |           |      |      |      |      |      |      |      |     |      |      |      |      |      |       |      |      |  |  |  |  |
|           |                | KQGGSPINPLVSDPK                                                                    | 3      | 100.0% | 2  |    |    |         |            |            |            |            |           |           |            |           |      |      |      |      |      |      |      |     |      |      |      |      |      |       |      |      |  |  |  |  |
|           |                | LCQGRASDGFQHLVWNTPK                                                                | 3      | 99.8%  | 1  |    |    |         |            |            |            |            |           |           |            |           |      |      |      |      |      |      |      |     |      |      |      |      |      |       |      |      |  |  |  |  |
|           |                | LVYDFQTFK                                                                          | 2      | 100.0% | 2  |    |    |         |            |            |            |            |           |           |            |           |      |      |      |      |      |      |      |     |      |      |      |      |      |       |      |      |  |  |  |  |
|           |                | GGGLGPMPLVSDPK                                                                     | 2      | 100.0% | 1  |    |    |         |            |            |            |            |           |           |            |           |      |      |      |      |      |      |      |     |      |      |      |      |      |       |      |      |  |  |  |  |
|           |                | QFTNHLGFSR                                                                         | 2      | 100.0% | 2  |    |    |         |            |            |            |            |           |           |            |           |      |      |      |      |      |      |      |     |      |      |      |      |      |       |      |      |  |  |  |  |
|           |                | RTADQVYGLK                                                                         | 2      | 99.5%  | 1  |    |    |         |            |            |            |            |           |           |            |           |      |      |      |      |      |      |      |     |      |      |      |      |      |       |      |      |  |  |  |  |
|           |                | TADQVYGLK                                                                          | 2      | 100.0% | 2  |    |    |         |            |            |            |            |           |           |            |           |      |      |      |      |      |      |      |     |      |      |      |      |      |       |      |      |  |  |  |  |
| PR0040774 | ARPC5          | Actin-related protein 2/3 complex subunit 5                                        | 100.0% | 20.7   | 2  | 2  | 3  | 1       | 3,665,705  | 3,561,556  | 3,947,440  | 4,158,800  | 376,683   | 269,498   | 291,660    | 384,598   | 20.2 | 15.3 | 16.5 | 20.7 | 1.1  | 0.6  | 1.1  | 0.6 | 1.1  | 0.4  | -1.0 | 1    | 1.1  | 0.7   | 1.1  | 0.7  |  |  |  |  |
|           |                | AVQSLDKNGVLLAK                                                                     | 2      | 99.8%  | 1  |    |    |         |            |            |            |            |           |           |            |           |      |      |      |      |      |      |      |     |      |      |      |      |      |       |      |      |  |  |  |  |
|           |                | QGNMATAALAK                                                                        | 2      | 100.0% | 2  |    |    |         |            |            |            |            |           |           |            |           |      |      |      |      |      |      |      |     |      |      |      |      |      |       |      |      |  |  |  |  |
| PR0010317 | DDX38A         | cDNA FLJ58567, moderately similar to ATP-dependent RNA helicase DDX38              | 100.0% | 14.8   | 2  | 2  | 8  | 405,191 | 413,077    | 405,985    | 482,662    | 54,392     | 24,250    | 31,325    | 19,176     | 30.0      | 13.1 | 17.3 | 9.3  | 1.0  | 0.9  | 1.0  | 1.1  | 1.1 | 0.4  | -1.0 | 0.9  | 1.1  | 0.1  | 1.1   | 0.2  |      |  |  |  |  |
| PR0040781 | DDX39B-SNORD84 | HLA-B associated transcript 1                                                      | 100.0% | 11.8   | 2  | 2  | 2  | 8       | 405,191    | 413,077    | 405,985    | 482,662    | 54,392    | 24,250    | 31,325     | 19,176    | 30.0 | 13.1 | 17.3 | 9.3  | 1.0  | 0.9  | 1.0  | 1.1 | 0.4  | -1.0 | 0.9  | 1.1  | 0.1  | 1.1   | 0.2  |      |  |  |  |  |
| PR0041329 | DDX39B-SNORD84 | HLA-B associated transcript 1                                                      | 100.0% | 11.8   | 2  | 2  | 2  | 8       | 405,191    | 413,077    | 405,985    | 482,662    | 54,392    | 24,250    | 31,325     | 19,176    | 30.0 | 13.1 | 17.3 | 9.3  | 1.0  | 0.9  | 1.0  | 1.1 | 0.4  | -1.0 | 0.9  | 1.1  | 0.1  | 1.1   | 0.2  |      |  |  |  |  |
| PR0041628 | DDX39B-SNORD84 | HLA-B associated transcript 1                                                      | 100.0% | 11.8   | 2  | 2  | 2  | 8       | 405,191    | 413,077    | 405,985    | 482,662    | 54,392    | 24,250    | 31,325     | 19,176    | 30.0 | 13.1 | 17.3 | 9.3  | 1.0  | 0.9  | 1.0  | 1.1 | 0.4  | -1.0 | 0.9  | 1.1  | 0.1  | 1.1   | 0.2  |      |  |  |  |  |
| PR0042880 | DDX39B-SNORD84 | HLA-B associated transcript 1                                                      | 100.0% | 11.2   | 2  | 2  | 2  | 8       | 405,191    | 413,077    | 405,985    | 482,662    | 54,392    | 24,250    | 31,325     | 19,176    | 30.0 | 13.1 | 17.3 | 9.3  | 1.0  | 0.9  | 1.0  | 1.1 | 0.4  | -1.0 | 0.9  | 1.1  | 0.1  | 1.1   | 0.2  |      |  |  |  |  |
| PR0071499 | DDX39B-SNORD84 | HLA-B associated transcript 1                                                      | 100.0% | 17.6   | 2  | 2  | 2  | 8       | 405,191    | 413,077    | 405,985    | 482,662    | 54,392    | 24,250    | 31,325     | 19,176    | 30.0 | 13.1 | 17.3 | 9.3  | 1.0  | 0.9  | 1.0  | 1.1 | 0.4  | -1.0 | 0.9  | 1.1  | 0.1  | 1.1   | 0.2  |      |  |  |  |  |
| PR0075722 | DDX39B-SNORD84 | HLA-B associated transcript 1                                                      | 100.0% | 12.7   | 2  | 2  | 2  | 8       | 405,191    | 413,077    | 405,985    | 482,662    | 54,392    | 24,250    | 31,325     | 19,176    | 30.0 | 13.1 | 17.3 | 9.3  | 1.0  | 0.9  | 1.0  | 1.1 | 0.4  | -1.0 | 0.9  | 1.1  | 0.1  | 1.1   | 0.2  |      |  |  |  |  |
| PR0090718 | DDX39B-SNORD84 | cDNA FLJ37676, highly similar to Spliceosome RNA helicase BAT1                     | 100.0% | 15.8   | 2  | 2  | 2  | 8       | 405,191    | 413,077    | 405,985    | 482,662    | 54,392    | 24,250    | 31,325     | 19,176    | 30.0 | 13.1 | 17.3 | 9.3  | 1.0  | 0.9  | 1.0  | 1.1 | 0.4  | -1.0 | 0.9  | 1.1  | 0.1  | 1.1   | 0.2  |      |  |  |  |  |
|           |                | DFLLKPELLR                                                                         | 3      | 90.9%  | 1  |    |    |         |            |            |            |            |           |           |            |           |      |      |      |      |      |      |      |     |      |      |      |      |      |       |      |      |  |  |  |  |
|           |                | GSYNSHSSGSR                                                                        | 2      | 99.7%  | 1  |    |    |         |            |            |            |            |           |           |            |           |      |      |      |      |      |      |      |     |      |      |      |      |      |       |      |      |  |  |  |  |
| PR0040938 | RALY           | RNA binding protein, autophagic                                                    | 99.4%  | 11.2   | 1  | 1  | 1  | 2       | 952,708    | 902,310    | 862,170    | 997,614    | 84,054    | 13,397    | 56,614     | 18,696    | 19.7 | 3.3  | 14.7 | 4.2  | -1.1 | 0.6  | -1.1 | 0.4 | 1.0  | 0.6  | -1.0 | 0.5  | 1.1  | 0.003 | 1.2  | 0.07 |  |  |  |  |
| PR0041351 | RALY           | RNA binding protein, autophagic                                                    | 99.4%  | 5.5    | 1  | 1  | 1  | 2       | 952,708    | 902,310    | 862,170    | 997,614    | 84,054    | 13,397    | 56,614     | 18,696    | 19.7 | 3.3  | 14.7 | 4.2  | -1.1 | 0.6  | -1.1 | 0.4 | 1.0  | 0.6  | -1.0 | 0.5  | 1.1  | 0.003 | 1.2  | 0.07 |  |  |  |  |
|           |                | KSNVTEGSK                                                                          | 2      | 99.0%  | 1  |    |    |         |            |            |            |            |           |           |            |           |      |      |      |      |      |      |      |     |      |      |      |      |      |       |      |      |  |  |  |  |
| PR0040968 | SAE1           | SUMO-activating enzyme subunit 1 isoform B                                         | 100.0% | 3.7    | 1  | 1  | 2  | 3       | 1,016,813  | 1,044,455  | 1,008,095  | 956,430    | 178,290   | 152,630   | 127,842    | 61,305    | 39.2 | 32.7 | 28.4 | 14.3 | 1.0  | 0.9  | -1.0 | 1   | -1.1 | 0.8  | -1.0 | 0.9  | -1.1 | 0.6   | -1.1 | 0.7  |  |  |  |  |
| PR0047008 | SAE1           | cDNA FLJ14889 fs, clone NT2RP2005204, highly similar to Ubiquitin-like 1-activator | 100.0% | 3.7    | 1  | 1  | 2  | 3       | 1,016,813  | 1,044,455  | 1,008,095  | 956,430    | 178,290   | 152,630   | 127,842    | 61,305    | 39.2 | 32.7 | 28.4 | 14.3 | 1.0  | 0.9  | -1.0 | 1   | -1.1 | 0.8  | -1.0 | 0.9  | -1.1 | 0.6   | -1.1 | 0.7  |  |  |  |  |
| PR0010142 | SAE1           | SUMO-activating enzyme subunit 1 isoform C                                         | 100.0% | 4.1    | 1  | 1  | 2  | 3       | 1,016,813  | 1,044,455  | 1,008,095  | 956,430    | 178,290   | 152,630   | 127,842    | 61,305    | 39.2 | 32.7 | 28.4 | 14.3 | 1.0  | 0.9  | -1.0 | 1   | -1.1 | 0.8  | -1.0 | 0.9  | -1.1 | 0.6   | -1.1 | 0.7  |  |  |  |  |
|           |                | AGNLNPMVVK                                                                         | 2      | 100.0% | 2  |    |    |         |            |            |            |            |           |           |            |           |      |      |      |      |      |      |      |     |      |      |      |      |      |       |      |      |  |  |  |  |
| PR0040989 | UBR4           | isoform 4 of E3 ubiquitin-protein ligase UBR4                                      | 99.8%  | 0.7    | 2  | 2  | 2  | 4       | 1,383,448  | 1,358,119  | 1,428,437  | 1,493,648  | 96,808    | 51,066    | 81,144     | 68,173    | 15.7 | 8.4  | 12.7 | 10.2 | -1.0 | 0.8  | 1.0  | 0.7 | 1.1  | 0.4  | 1.1  | 0.5  | 1.1  | 0.2   | 1.0  | 0.6  |  |  |  |  |
| PR0046623 | UBR4           | isoform 3 of E3 ubiquitin-protein ligase UBR4                                      | 99.6%  | 0.7    | 2  | 2  | 2  | 4       | 1,383,448  | 1,358,119  | 1,428,437  | 1,493,648  | 96,808    | 51,066    | 81,144     | 68,173    | 15.7 | 8.4  | 12.7 | 10.2 | -1.0 | 0.8  | 1.0  | 0.7 | 1.1  | 0.4  | 1.1  | 0.5  | 1.1  | 0.2   | 1.0  | 0.6  |  |  |  |  |
| PR0074634 | UBR4           | isoform 2 of E3 ubiquitin-protein ligase UBR4                                      | 99.6%  | 0.7    | 2  | 2  | 2  | 4       | 1,383,448  | 1,358,119  | 1,428,437  | 1,493,648  | 96,808    | 51,066    | 81,144     | 68,173    | 15.7 | 8.4  | 12.7 | 10.2 | -1.0 | 0.8  | 1.0  | 0.7 | 1.1  | 0.4  | 1.1  | 0.5  | 1.1  | 0.2   | 1.0  | 0.6  |  |  |  |  |
| PR0043999 | UBR4           | isoform 1 of E3 ubiquitin-protein ligase UBR4                                      | 99.8%  | 0.7    | 2  | 2  | 2  | 4       | 1,383,448  | 1,358,119  | 1,428,437  | 1,493,648  | 96,808    | 51,066    | 81,144     | 68,173    | 15.7 | 8.4  | 12.7 | 10.2 | -1.0 | 0.8  | 1.0  | 0.7 | 1.1  | 0.4  | 1.1  | 0.5  | 1.1  | 0.2   | 1.0  | 0.6  |  |  |  |  |
|           |                | ILGPEDEFAR                                                                         | 2      | 98.0%  | 1  |    |    |         |            |            |            |            |           |           |            |           |      |      |      |      |      |      |      |     |      |      |      |      |      |       |      |      |  |  |  |  |
|           |                | LEQVSDSEGGLAENLEALR                                                                | 2      | 99.0%  | 1  |    |    |         |            |            |            |            |           |           |            |           |      |      |      |      |      |      |      |     |      |      |      |      |      |       |      |      |  |  |  |  |
| PR0041044 | ESD            | 28 kDa protein                                                                     | 100.0% | 13.8   | 2  | 2  | 2  | 2       | 2,501,563  | 2,465,392  | 2,989,812  | 2,667,739  | 120,919   | 287,168   | 153,037    | 285,029   | 10.8 | 26.1 | 11.9 | 23.9 | -1.0 | 0.8  | 1.1  | 0.1 | 1.0  | 0.7  | 1.2  | 0.2  | 1.1  | 0.6   | -1.1 | 0.6  |  |  |  |  |
| PR0029528 | ESD            | Protein                                                                            | 100.0% | 15.2   | 2  | 2  | 2  | 2       | 2,501,563  | 2,465,392  | 2,989,812  | 2,667,739  | 120,919   | 287,168   | 153,037    | 285,029   | 10.8 | 26.1 | 11.9 | 23.9 | -1.0 | 0.8  | 1.1  | 0.1 | 1.0  | 0.7  | 1.2  | 0.2  | 1.1  | 0.6   | -1.1 | 0.6  |  |  |  |  |
|           |                | AFSGYLGTDGSK                                                                       | 2      | 98.0%  | 1  |    |    |         |            |            |            |            |           |           |            |           |      |      |      |      |      |      |      |     |      |      |      |      |      |       |      |      |  |  |  |  |
| PR0041064 | NUD15          | Uncharacterized protein                                                            | 100.0% | 13.3   | 1  | 1  | 2  | 1       | 672,162    | 641,487    | 622,353    |            |           |           |            |           |      |      |      |      |      |      |      |     |      |      |      |      |      |       |      |      |  |  |  |  |





|           |         |                                                                             |        |        |    |            |            |            |            |            |            |            |           |           |           |         |      |      |      |      |      |      |      |      |      |      |      |        |        |      |      |      |  |  |
|-----------|---------|-----------------------------------------------------------------------------|--------|--------|----|------------|------------|------------|------------|------------|------------|------------|-----------|-----------|-----------|---------|------|------|------|------|------|------|------|------|------|------|------|--------|--------|------|------|------|--|--|
| PK0043194 | PKKP    | cDNA FL35279 fs, clone PRO81200679, highly similar to 6-phosphofruktokinase | 100.0% | 7.7    | 4  | 4          | 6          | 1          | 18,131,855 | 19,900,750 | 17,781,295 | 21,455,310 | 2,161,999 | 784,444   | 1,476,118 | 890,559 | 26.7 | 8.8  | 18.6 | 10.3 | 1.1  | 0.5  | -1.0 | 0.9  | 1.2  | 0.2  | -1.1 | 0.2    | 1.1    | 0.3  | 1.2  | 0.07 |  |  |
|           |         | ASVDYDSGGLEWVQPSWV                                                          | 2      | 100.0% | 2  | 100.0%     | 2          |            |            |            |            |            |           |           |           |         |      |      |      |      |      |      |      |      |      |      |      |        |        |      |      |      |  |  |
|           |         | EGWTVGTVGWTGCGGSLGTK                                                        | 2      | 100.0% | 2  | 100.0%     | 2          |            |            |            |            |            |           |           |           |         |      |      |      |      |      |      |      |      |      |      |      |        |        |      |      |      |  |  |
|           |         | NYVQFYVLELK                                                                 | 2      | 100.0% | 2  | 100.0%     | 1          |            |            |            |            |            |           |           |           |         |      |      |      |      |      |      |      |      |      |      |      |        |        |      |      |      |  |  |
|           |         | VTLGHVGR                                                                    | 2      | 99.2%  | 1  | 100.0%     | 1          |            | 480,672    | 408,997    | 438,939    | 441,144    | 117,452   | 45,001    | 43,303    | 44,938  | 54.6 | 24.6 | 22.1 | 22.8 | -1.2 | 0.6  | -1.1 | 0.8  | -1.1 | 0.8  | 1.1  | 0.6    | 1.1    | 0.6  | 1.0  | 1    |  |  |
| PK0043286 | SOR9BU1 | Isolom 2 of Epermerase family protein SOR9BU1                               | 93.9%  |        |    |            |            |            |            |            |            |            |           |           |           |         |      |      |      |      |      |      |      |      |      |      |      |        |        |      |      |      |  |  |
|           |         | VLVGGDGTGFATLQLNAR                                                          | 3      | 93.9%  | 1  | 100.0%     | 1          |            |            |            |            |            |           |           |           |         |      |      |      |      |      |      |      |      |      |      |      |        |        |      |      |      |  |  |
|           |         | 20.8                                                                        | 2      | 2      | 2  | 3          | 1          | 4,474,295  | 4,215,510  | 4,583,005  | 4,861,330  | 507,726    | 71,966    | 356,794   | 89,426    | 25.4    | 3.8  | 17.4 | 4.1  | -1.1 | 0.6  | 1.0  | 0.9  | 1.1  | 0.5  | 1.1  | 0.4  | 1.2    | 0.0005 | 1.1  | 0.5  |      |  |  |
|           |         | GYWVGAQPTWEDQPHNKK                                                          | 3      | 100.0% | 1  | 100.0%     | 1          |            |            |            |            |            |           |           |           |         |      |      |      |      |      |      |      |      |      |      |      |        |        |      |      |      |  |  |
|           |         | VLSLAMEDETDWK                                                               | 2      | 100.0% | 2  | 100.0%     | 2          |            |            |            |            |            |           |           |           |         |      |      |      |      |      |      |      |      |      |      |      |        |        |      |      |      |  |  |
| PK0043351 | YBK1    | Protein                                                                     | 100.0% |        |    |            |            |            |            |            |            |            |           |           |           |         |      |      |      |      |      |      |      |      |      |      |      |        |        |      |      |      |  |  |
|           |         | 21.7                                                                        | 5      | 5      | 7  | 1          | 2,822,817  | 2,901,016  | 2,697,644  | 3,312,638  | 229,271    | 128,503    | 195,025   | 147,688   | 18.2      | 9.9     | 16.2 | 10.0 | 0.8  | -1.0 | 0.7  | 1.2  | 0.1  | -1.7 | 0.4  | 1.1  | 0.07 | 1.2    | 0.04   |      |      |      |  |  |
|           |         | GAEANVAGRGVPSVGGSK                                                          | 2      | 100.0% | 2  | 100.0%     | 2          |            |            |            |            |            |           |           |           |         |      |      |      |      |      |      |      |      |      |      |      |        |        |      |      |      |  |  |
|           |         | NDEKEDVYVHTAKK                                                              | 3      | 100.0% | 1  | 100.0%     | 1          |            |            |            |            |            |           |           |           |         |      |      |      |      |      |      |      |      |      |      |      |        |        |      |      |      |  |  |
|           |         | NYQDNYNSESSEKHEGSESAPGSAQR                                                  | 3      | 100.0% | 1  | 100.0%     | 1          |            |            |            |            |            |           |           |           |         |      |      |      |      |      |      |      |      |      |      |      |        |        |      |      |      |  |  |
|           |         | SVGDGTEHDFVYVESEK                                                           | 2      | 100.0% | 2  | 100.0%     | 2          |            |            |            |            |            |           |           |           |         |      |      |      |      |      |      |      |      |      |      |      |        |        |      |      |      |  |  |
|           |         | SVGDGTEVDFVVEGKEAEANVTPGGVPSVGGSK                                           | 3      | 100.0% | 1  | 100.0%     | 1          |            |            |            |            |            |           |           |           |         |      |      |      |      |      |      |      |      |      |      |      |        |        |      |      |      |  |  |
| PK0043370 | TPM3    | Tropomyosin 3                                                               | 100.0% |        |    |            |            |            |            |            |            |            |           |           |           |         |      |      |      |      |      |      |      |      |      |      |      |        |        |      |      |      |  |  |
|           |         | 12.7                                                                        | 2      | 2      | 2  | 1          | 16,784,137 | 16,418,228 | 15,672,278 | 18,510,885 | 1,782,717  | 1,549,622  | 973,770   | 1,213,221 | 23.4      | 21.1    | 13.8 | 14.7 | -1.0 | 0.9  | -1.1 | 0.6  | 1.1  | 0.4  | -1.0 | 0.7  | 1.1  | 0.3    | 1.2    | 0.1  | 0.2  |      |  |  |
|           |         | KLWRSRDLR                                                                   | 2      | 100.0% | 1  | 100.0%     | 1          |            |            |            |            |            |           |           |           |         |      |      |      |      |      |      |      |      |      |      |      |        |        |      |      |      |  |  |
|           |         | MELQIQLK                                                                    | 2      | 98.0%  | 1  | 100.0%     | 1          |            |            |            |            |            |           |           |           |         |      |      |      |      |      |      |      |      |      |      |      |        |        |      |      |      |  |  |
| PK0043452 | SMS     | Protein                                                                     | 99.6%  |        |    |            |            |            |            |            |            |            |           |           |           |         |      |      |      |      |      |      |      |      |      |      |      |        |        |      |      |      |  |  |
|           |         | 7.4                                                                         | 1      | 1      | 1  | 1          | 298,537    | 327,458    | 379,367    | 350,780    | 31,466     | 23,627     | 24,850    | 20,539    | 23.6      | 16.1    | 14.7 | 13.1 | 1.1  | 0.5  | 1.3  | 0.88 | 1.2  | 0.2  | 1.2  | 0.2  | 1.1  | 0.5    | -1.1   | 0.4  |      |      |  |  |
|           |         | QFGNLLSDNLSLSESLAVLR                                                        | 2      | 99.6%  | 1  | 100.0%     | 1          |            |            |            |            |            |           |           |           |         |      |      |      |      |      |      |      |      |      |      |      |        |        |      |      |      |  |  |
| PK0043517 | PLIN2   | Uncharacterized protein                                                     | 100.0% |        |    |            |            |            |            |            |            |            |           |           |           |         |      |      |      |      |      |      |      |      |      |      |      |        |        |      |      |      |  |  |
|           |         | 14.3                                                                        | 4      | 4      | 4  | 1          | 10,453,085 | 9,443,000  | 10,315,485 | 11,723,980 | 935,109    | 344,037    | 488,368   | 159,103   | 20.0      | 8.2     | 10.6 | 3.0  | -1.1 | 0.4  | -1.0 | 0.9  | 1.1  | 0.2  | 1.1  | 0.2  | 1.2  | 0.0003 | 1.1    | 0.04 |      |      |  |  |
|           |         | DAVTTTTYTGAK                                                                | 2      | 100.0% | 1  | 100.0%     | 1          |            |            |            |            |            |           |           |           |         |      |      |      |      |      |      |      |      |      |      |      |        |        |      |      |      |  |  |
|           |         | EDVNSITGVDMK                                                                | 2      | 100.0% | 1  | 100.0%     | 1          |            |            |            |            |            |           |           |           |         |      |      |      |      |      |      |      |      |      |      |      |        |        |      |      |      |  |  |
|           |         | EVSSDLSLTSK                                                                 | 2      | 98.6%  | 1  | 100.0%     | 1          |            |            |            |            |            |           |           |           |         |      |      |      |      |      |      |      |      |      |      |      |        |        |      |      |      |  |  |
|           |         | LPLNLSRPSITGVANAK                                                           | 2      | 100.0% | 1  | 100.0%     | 1          |            |            |            |            |            |           |           |           |         |      |      |      |      |      |      |      |      |      |      |      |        |        |      |      |      |  |  |
| PK0043599 | ACO1    | Aconitase 1, soluble                                                        | 100.0% |        |    |            |            |            |            |            |            |            |           |           |           |         |      |      |      |      |      |      |      |      |      |      |      |        |        |      |      |      |  |  |
|           |         | 2.3                                                                         | 2      | 2      | 3  | 1          | 2,098,188  | 2,015,708  | 2,285,360  | 2,361,712  | 165,538    | 113,865    | 199,810   | 95,881    | 17.6      | 12.6    | 19.6 | 8.1  | -1.0 | 0.7  | 1.1  | 0.5  | 1.1  | 0.2  | 1.1  | 0.2  | 1.1  | 0.3    | 1.2    | 0.05 | 1.0  | 0.7  |  |  |
|           |         | PVEFFGGVVAQLSIADR                                                           | 2      | 100.0% | 2  | 100.0%     | 2          |            |            |            |            |            |           |           |           |         |      |      |      |      |      |      |      |      |      |      |      |        |        |      |      |      |  |  |
|           |         | VILGQFTGVVAVVDFAMRR                                                         | 2      | 100.0% | 1  | 100.0%     | 1          | 3,078,670  | 3,213,459  | 3,929,085  | 3,540,385  | 253,569    | 297,519   | 170,169   | 286,776   | 18.4    | 20.7 | 9.7  | 18.1 | 1.0  | 0.7  | 1.3  | 0.02 | 1.1  | 0.3  | 1.2  | 0.07 | 1.1    | 0.5    | -1.1 | 0.3  |      |  |  |
|           |         | AAUCLAGAR                                                                   | 2      | 99.9%  | 1  | 100.0%     | 1          |            |            |            |            |            |           |           |           |         |      |      |      |      |      |      |      |      |      |      |      |        |        |      |      |      |  |  |
|           |         | FALGSLGGVSLMMAR                                                             | 2      | 100.0% | 1  | 100.0%     | 1          | 3,987,477  | 3,828,267  | 3,667,617  | 4,562,507  | 233,857    | 194,961   | 278,601   | 261,411   | 13.1    | 11.4 | 17.0 | 12.8 | -1.0 | 0.6  | -1.3 | 0.4  | 1.1  | 0.1  | -1.0 | 0.6  | 1.2    | 0.05   | 1.2  | 0.06 |      |  |  |
| PK0043900 | NARS    | cDNA FL36262, highly similar to Asparaginyl-tRNA synthetase, cytoplasmic    | 100.0% |        |    |            |            |            |            |            |            |            |           |           |           |         |      |      |      |      |      |      |      |      |      |      |      |        |        |      |      |      |  |  |
| PK0044666 | NARS    | cDNA FL36246, highly similar to Asparaginyl-tRNA synthetase, cytoplasmic    | 100.0% |        |    |            |            |            |            |            |            |            |           |           |           |         |      |      |      |      |      |      |      |      |      |      |      |        |        |      |      |      |  |  |
|           |         | 1.5                                                                         | 1      | 1      | 1  | 2          | 3,987,477  | 3,828,267  | 3,667,617  | 4,562,507  | 233,857    | 194,961    | 278,601   | 261,411   | 13.1      | 11.4    | 17.0 | 12.8 | -1.0 | 0.6  | -1.3 | 0.4  | 1.1  | 0.1  | -1.0 | 0.6  | 1.2  | 0.05   | 1.2    | 0.06 |      |      |  |  |
|           |         | 4.6                                                                         | 1      | 1      | 1  | 2          | 3,987,477  | 3,828,267  | 3,667,617  | 4,562,507  | 233,857    | 194,961    | 278,601   | 261,411   | 13.1      | 11.4    | 17.0 | 12.8 | -1.0 | 0.6  | -1.3 | 0.4  | 1.1  | 0.1  | -1.0 | 0.6  | 1.2  | 0.05   | 1.2    | 0.06 |      |      |  |  |
| PK0043920 | TKT     | cDNA FL36457, highly similar to Transketolase                               | 100.0% |        |    |            |            |            |            |            |            |            |           |           |           |         |      |      |      |      |      |      |      |      |      |      |      |        |        |      |      |      |  |  |
|           |         | 31.1                                                                        | 10     | 10     | 3  | 34,786,502 | 34,648,170 | 33,815,371 | 40,077,604 | 2,561,944  | 1,233,593  | 2,308,665  | 1,345,784 | 16.5      | 8.0       | 15.3    | 7.5  | -1.0 | 1    | -1.0 | 0.8  | 1.2  | 0.1  | -1.0 | 0.8  | 1.2  | 0.02 | 1.2    | 0.02   | 1.2  | 0.06 |      |  |  |
| PK0079311 | TKT     | cDNA FL36274, highly similar to Transketolase                               | 100.0% |        |    |            |            |            |            |            |            |            |           |           |           |         |      |      |      |      |      |      |      |      |      |      |      |        |        |      |      |      |  |  |
|           |         | 34.0                                                                        | 16     | 20     | 27 | 34,786,502 | 34,648,170 | 33,815,371 | 40,077,604 | 2,561,944  | 1,233,593  | 2,308,665  | 1,345,784 | 16.5      | 8.0       | 15.3    | 7.5  | -1.0 | 1    | -1.0 | 0.8  | 1.2  | 0.1  | -1.0 | 0.8  | 1.2  | 0.02 | 1.2    | 0.02   | 1.2  | 0.06 |      |  |  |
| PK0042978 | TKT     | Transketolase                                                               | 100.0% |        |    |            |            |            |            |            |            |            |           |           |           |         |      |      |      |      |      |      |      |      |      |      |      |        |        |      |      |      |  |  |
|           |         | 31.5                                                                        | 16     | 20     | 27 | 34,786,502 | 34,648,170 | 33,815,371 | 40,077,604 | 2,561,944  | 1,233,593  | 2,308,665  | 1,345,784 | 16.5      | 8.0       | 15.3    | 7.5  | -1.0 | 1    | -1.0 | 0.8  | 1.2  | 0.1  | -1.0 | 0.8  | 1.2  | 0.02 | 1.2    | 0.02   | 1.2  | 0.06 |      |  |  |
|           |         | 100.0%                                                                      | 1      | 100.0% | 1  | 100.0%     | 1          |            |            |            |            |            |           |           |           |         |      |      |      |      |      |      |      |      |      |      |      |        |        |      |      |      |  |  |
|           |         | AVELAANK                                                                    | 2      | 100.0% | 2  | 100.0%     | 2          |            |            |            |            |            |           |           |           |         |      |      |      |      |      |      |      |      |      |      |      |        |        |      |      |      |  |  |
|           |         | GITGVDEKESVHWKPLPK                                                          | 3      | 81.1%  | 1  | 100.0%     | 1          |            |            |            |            |            |           |           |           |         |      |      |      |      |      |      |      |      |      |      |      |        |        |      |      |      |  |  |
|           |         | IKLNDSTTK                                                                   | 2      | 100.0% | 1  | 100.0%     | 1          |            |            |            |            |            |           |           |           |         |      |      |      |      |      |      |      |      |      |      |      |        |        |      |      |      |  |  |
|           |         | ILATPPQEDAPSVVDANR                                                          | 2      | 100.0% | 2  | 100.0%     | 2          |            |            |            |            |            |           |           |           |         |      |      |      |      |      |      |      |      |      |      |      |        |        |      |      |      |  |  |



|           |         |                                                                                 |        |                            |        |        |    |            |            |            |            |            |           |           |           |           |         |      |      |      |      |      |      |      |      |       |      |      |      |      |      |      |      |  |  |  |  |
|-----------|---------|---------------------------------------------------------------------------------|--------|----------------------------|--------|--------|----|------------|------------|------------|------------|------------|-----------|-----------|-----------|-----------|---------|------|------|------|------|------|------|------|------|-------|------|------|------|------|------|------|------|--|--|--|--|
| P0064578  | TMEM91B | Conserved hypothetical protein                                                  | 93.4%  | YFTQALNFK                  | 2      | 100.0% | 2  | 1          | 1          | 644.423    | 656.423    | 735.725    | 804.374   | 130.894   | 132.915   | 113.227   | 133.169 | 45.4 | 45.3 | 34.4 | 37.0 | 1.0  | 1    | 1.1  | 0.6  | 1.2   | 0.4  | 1.1  | 0.7  | 1.2  | 0.5  | 1.1  | 0.7  |  |  |  |  |
| P0064604  | CAPZB   | cDNA FLJ33095 fs, clone CORDE2000541, highly similar to F-actin capping protein | 100.0% | RLRVALEPLKGGDDPAPLHAWPAGAA | 3      | 93.4%  | 1  | 1          | 1          | 5.863.631  | 5,955.357  | 5,719.216  | 6,784.303 | 562.713   | 245.350   | 437.841   | 275.269 | 21.4 | 9.2  | 17.1 | 9.1  | 1.0  | 0.9  | -1.0 | 0.8  | 1.2   | 0.2  | -1.0 | 0.7  | 1.1  | 0.05 | 1.2  | 0.07 |  |  |  |  |
| P01013714 | CAPZB   | Capping protein (Actin filament) mouse Z1nc, beta                               | 100.0% | 41.3                       | 7      | 7      | 10 | 2          | 5.863.631  | 5,955.357  | 5,719.216  | 6,784.303  | 562.713   | 245.350   | 437.841   | 275.269   | 21.4    | 9.2  | 17.1 | 9.1  | 1.0  | 0.9  | -1.0 | 0.8  | 1.2  | 0.2   | -1.0 | 0.7  | 1.1  | 0.05 | 1.2  | 0.07 |      |  |  |  |  |
|           |         | DYDQVNR                                                                         |        | 2                          | 100.0% | 2      |    |            |            |            |            |            |           |           |           |           |         |      |      |      |      |      |      |      |      |       |      |      |      |      |      |      |      |  |  |  |  |
|           |         | LEVANNFQYR                                                                      |        | 2                          | 100.0% | 2      |    |            |            |            |            |            |           |           |           |           |         |      |      |      |      |      |      |      |      |       |      |      |      |      |      |      |      |  |  |  |  |
|           |         | QMEKDETVSQCSPHANIGR                                                             |        | 3                          | 99.9%  | 1      |    |            |            |            |            |            |           |           |           |           |         |      |      |      |      |      |      |      |      |       |      |      |      |      |      |      |      |  |  |  |  |
|           |         | RLPFGQEK                                                                        |        | 2                          | 99.9%  | 2      |    |            |            |            |            |            |           |           |           |           |         |      |      |      |      |      |      |      |      |       |      |      |      |      |      |      |      |  |  |  |  |
|           |         | SGSFTNLKGLSLIR                                                                  |        | 2                          | 100.0% | 2      |    |            |            |            |            |            |           |           |           |           |         |      |      |      |      |      |      |      |      |       |      |      |      |      |      |      |      |  |  |  |  |
|           |         | SPVSNKYDPLLEDGAMPASR                                                            |        | 3                          | 100.0% | 1      |    |            |            |            |            |            |           |           |           |           |         |      |      |      |      |      |      |      |      |       |      |      |      |      |      |      |      |  |  |  |  |
|           |         | YDFPLEGAMPASR                                                                   |        | 2                          | 98.2%  | 1      |    |            |            |            |            |            |           |           |           |           |         |      |      |      |      |      |      |      |      |       |      |      |      |      |      |      |      |  |  |  |  |
| P00646121 | CPNE1   | Copine I                                                                        | 100.0% | 15.3                       | 4      | 6      | 1  | 1,513.728  | 1,826.694  | 1,614.401  | 1,944.049  | 106.750    | 74.225    | 87.124    | 148.626   | 15.8      | 9.1     | 12.1 | 17.1 | 1.2  | 0.04 | 1.1  | 0.5  | 1.3  | 0.05 | -1.1  | 0.1  | 1.1  | 0.5  | 1.2  | 0.09 |      |      |  |  |  |  |
|           |         | FGYIDNKK                                                                        |        | 2                          | 98.5%  | 1      |    |            |            |            |            |            |           |           |           |           |         |      |      |      |      |      |      |      |      |       |      |      |      |      |      |      |      |  |  |  |  |
|           |         | LYGTFNFRNHWIAR                                                                  |        | 3                          | 100.0% | 3      |    |            |            |            |            |            |           |           |           |           |         |      |      |      |      |      |      |      |      |       |      |      |      |      |      |      |      |  |  |  |  |
|           |         | SDPFLFR                                                                         |        | 2                          | 100.0% | 2      |    |            |            |            |            |            |           |           |           |           |         |      |      |      |      |      |      |      |      |       |      |      |      |      |      |      |      |  |  |  |  |
|           |         | SDPLCLVLDGGSSWAMELGR                                                            |        | 2                          | 100.0% | 2      |    |            |            |            |            |            |           |           |           |           |         |      |      |      |      |      |      |      |      |       |      |      |      |      |      |      |      |  |  |  |  |
| P00646182 | ATPIA1  | sodium/potassium-translocating ATPase subunit alpha-1 isoform c                 | 100.0% | 25.2                       | 19     | 19     | 25 | 2          | 37,513.298 | 39,298.141 | 39,962.491 | 43,292.918 | 2,980.923 | 1,942.340 | 2,526.533 | 1,574.365 | 17.7    | 11.1 | 14.1 | 8.1  | 1.0  | 0.6  | 1.1  | 0.5  | 1.2  | 0.1   | 1.0  | 0.8  | 1.1  | 0.1  | 1.1  | 0.3  |      |  |  |  |  |
| P00977640 | ATPIA1  | sodium/potassium-translocating ATPase subunit alpha-1 isoform d                 | 100.0% | 26.0                       | 19     | 19     | 25 | 2          | 37,513.298 | 39,298.141 | 39,962.491 | 43,292.918 | 2,980.923 | 1,942.340 | 2,526.533 | 1,574.365 | 17.7    | 11.1 | 14.1 | 8.1  | 1.0  | 0.6  | 1.1  | 0.5  | 1.2  | 0.1   | 1.0  | 0.8  | 1.1  | 0.1  | 1.1  | 0.3  |      |  |  |  |  |
|           |         | ADGVAMRAGSDVSK                                                                  |        | 2                          | 100.0% | 2      |    |            |            |            |            |            |           |           |           |           |         |      |      |      |      |      |      |      |      |       |      |      |      |      |      |      |      |  |  |  |  |
|           |         | AVKAGDSESKLKI                                                                   |        | 2                          | 100.0% | 2      |    |            |            |            |            |            |           |           |           |           |         |      |      |      |      |      |      |      |      |       |      |      |      |      |      |      |      |  |  |  |  |
|           |         | AVFGANGENPLIK                                                                   |        | 2                          | 100.0% | 2      |    |            |            |            |            |            |           |           |           |           |         |      |      |      |      |      |      |      |      |       |      |      |      |      |      |      |      |  |  |  |  |
|           |         | DGNALTPPPTPEWIK                                                                 |        | 2                          | 97.7%  | 1      |    |            |            |            |            |            |           |           |           |           |         |      |      |      |      |      |      |      |      |       |      |      |      |      |      |      |      |  |  |  |  |
|           |         | DMFTEGDSLSK                                                                     |        | 2                          | 100.0% | 1      |    |            |            |            |            |            |           |           |           |           |         |      |      |      |      |      |      |      |      |       |      |      |      |      |      |      |      |  |  |  |  |
|           |         | EQPLDEELKQAFQAVYLELGGLEGR                                                       |        | 3                          | 100.0% | 1      |    |            |            |            |            |            |           |           |           |           |         |      |      |      |      |      |      |      |      |       |      |      |      |      |      |      |      |  |  |  |  |
|           |         | GVVYVIGDR                                                                       |        | 2                          | 100.0% | 1      |    |            |            |            |            |            |           |           |           |           |         |      |      |      |      |      |      |      |      |       |      |      |      |      |      |      |      |  |  |  |  |
|           |         | IGGLGNK                                                                         |        | 2                          | 95.9%  | 1      |    |            |            |            |            |            |           |           |           |           |         |      |      |      |      |      |      |      |      |       |      |      |      |      |      |      |      |  |  |  |  |
|           |         | IVLFFNNTK                                                                       |        | 2                          | 99.9%  | 2      |    |            |            |            |            |            |           |           |           |           |         |      |      |      |      |      |      |      |      |       |      |      |      |      |      |      |      |  |  |  |  |
|           |         | LNPFVQGNRP                                                                      |        | 2                          | 99.9%  | 2      |    |            |            |            |            |            |           |           |           |           |         |      |      |      |      |      |      |      |      |       |      |      |      |      |      |      |      |  |  |  |  |
|           |         | LSLDELHR                                                                        |        | 2                          | 98.6%  | 1      |    |            |            |            |            |            |           |           |           |           |         |      |      |      |      |      |      |      |      |       |      |      |      |      |      |      |      |  |  |  |  |
|           |         | MSINAEVVVDLVEVK                                                                 |        | 2                          | 100.0% | 1      |    |            |            |            |            |            |           |           |           |           |         |      |      |      |      |      |      |      |      |       |      |      |      |      |      |      |      |  |  |  |  |
|           |         | NWTFSEPLGLWIK                                                                   |        | 3                          | 99.9%  | 1      |    |            |            |            |            |            |           |           |           |           |         |      |      |      |      |      |      |      |      |       |      |      |      |      |      |      |      |  |  |  |  |
|           |         | QAMNMLLEDKASVTVFEEGR                                                            |        | 2                          | 100.0% | 2      |    |            |            |            |            |            |           |           |           |           |         |      |      |      |      |      |      |      |      |       |      |      |      |      |      |      |      |  |  |  |  |
|           |         | QGANAVTGGDNDSPALK                                                               |        | 2                          | 100.0% | 2      |    |            |            |            |            |            |           |           |           |           |         |      |      |      |      |      |      |      |      |       |      |      |      |      |      |      |      |  |  |  |  |
|           |         | SPDFINENPLETR                                                                   |        | 2                          | 100.0% | 2      |    |            |            |            |            |            |           |           |           |           |         |      |      |      |      |      |      |      |      |       |      |      |      |      |      |      |      |  |  |  |  |
|           |         | VMKTFGSPITAK                                                                    |        | 2                          | 99.7%  | 1      |    |            |            |            |            |            |           |           |           |           |         |      |      |      |      |      |      |      |      |       |      |      |      |      |      |      |      |  |  |  |  |
|           |         | VTGLDLSR                                                                        |        | 2                          | 97.7%  | 1      |    |            |            |            |            |            |           |           |           |           |         |      |      |      |      |      |      |      |      |       |      |      |      |      |      |      |      |  |  |  |  |
| P00646189 | CNDP2   | 8.15a protein                                                                   | 100.0% | 18.4                       | 1      | 1      | 1  | 1          | 563.330    | 617.610    | 659.978    | 607.668    | 34.862    | 57.278    | 38.608    | 30.883    | 14.1    | 20.7 | 13.1 | 11.4 | 1.1  | 0.4  | 1.2  | 0.07 | 1.1  | 0.3   | 1.1  | 0.6  | -1.0 | 0.9  | -1.1 | 0.3  |      |  |  |  |  |
|           |         | LYDDDFDEEFAK                                                                    |        | 2                          | 100.0% | 1      |    |            |            |            |            |            |           |           |           |           |         |      |      |      |      |      |      |      |      |       |      |      |      |      |      |      |      |  |  |  |  |
|           |         | 51.4                                                                            |        | 11                         | 14     | 21     | 1  | 54,436.648 | 53,745.512 | 52,751.223 | 58,218.368 | 4,450.219  | 2,958.248 | 3,220.928 | 2,371.725 | 16.3      | 12.3    | 13.7 | 9.1  | -1.0 | 0.9  | -1.0 | 0.8  | 1.1  | 0.5  | -1.0  | 0.8  | 1.1  | 0.3  | 1.1  | 0.2  |      |      |  |  |  |  |
|           |         | DFMAGQDGRTR                                                                     |        | 2                          | 100.0% | 2      |    |            |            |            |            |            |           |           |           |           |         |      |      |      |      |      |      |      |      |       |      |      |      |      |      |      |      |  |  |  |  |
|           |         | DKPLKDVHADCGK                                                                   |        | 2                          | 97.9%  | 1      |    |            |            |            |            |            |           |           |           |           |         |      |      |      |      |      |      |      |      |       |      |      |      |      |      |      |      |  |  |  |  |
|           |         | DKPLKDVHADCGK                                                                   |        | 3                          | 99.9%  | 1      |    |            |            |            |            |            |           |           |           |           |         |      |      |      |      |      |      |      |      |       |      |      |      |      |      |      |      |  |  |  |  |
|           |         | DTNKSQFPTIVK                                                                    |        | 2                          | 100.0% | 2      |    |            |            |            |            |            |           |           |           |           |         |      |      |      |      |      |      |      |      |       |      |      |      |      |      |      |      |  |  |  |  |
|           |         | FPDENK                                                                          |        | 2                          | 97.8%  | 1      |    |            |            |            |            |            |           |           |           |           |         |      |      |      |      |      |      |      |      |       |      |      |      |      |      |      |      |  |  |  |  |
|           |         | HVVQFK                                                                          |        | 1                          | 97.1%  | 1      |    |            |            |            |            |            |           |           |           |           |         |      |      |      |      |      |      |      |      |       |      |      |      |      |      |      |      |  |  |  |  |
|           |         | IEVEKFFAAKE                                                                     |        | 2                          | 99.2%  | 2      |    |            |            |            |            |            |           |           |           |           |         |      |      |      |      |      |      |      |      |       |      |      |      |      |      |      |      |  |  |  |  |
|           |         | IEVEKFFAAKE                                                                     |        | 3                          | 98.3%  | 1      |    |            |            |            |            |            |           |           |           |           |         |      |      |      |      |      |      |      |      |       |      |      |      |      |      |      |      |  |  |  |  |
|           |         | IGDEVGVYVFLGFK                                                                  |        | 3                          | 100.0% | 1      |    |            |            |            |            |            |           |           |           |           |         |      |      |      |      |      |      |      |      |       |      |      |      |      |      |      |      |  |  |  |  |
|           |         | TAVLDK                                                                          |        | 3                          | 94.4%  | 2      |    |            |            |            |            |            |           |           |           |           |         |      |      |      |      |      |      |      |      |       |      |      |      |      |      |      |      |  |  |  |  |
|           |         | TVDMFVALATGEK                                                                   |        | 2                          | 100.0% | 2      |    |            |            |            |            |            |           |           |           |           |         |      |      |      |      |      |      |      |      |       |      |      |      |      |      |      |      |  |  |  |  |
|           |         | VWDFMAGGDFGK                                                                    |        | 2                          | 100.0% | 2      |    |            |            |            |            |            |           |           |           |           |         |      |      |      |      |      |      |      |      |       |      |      |      |      |      |      |      |  |  |  |  |
|           |         | VWDFMAGGDFGK                                                                    |        | 3                          | 100.0% | 1      |    |            |            |            |            |            |           |           |           |           |         |      |      |      |      |      |      |      |      |       |      |      |      |      |      |      |      |  |  |  |  |
|           |         | VLEGSEVVR                                                                       |        | 2                          | 100.0% | 2      |    |            |            |            |            |            |           |           |           |           |         |      |      |      |      |      |      |      |      |       |      |      |      |      |      |      |      |  |  |  |  |
| P00646396 | CEPT10  | Centrosomal protein 110kDa                                                      | 95.2%  | 0.4                        | 1      | 1      | 1  | 3          | 642.327    | 866.240    | 1,062.265  | 830.717    | 51.612    | 59.387    | 168.821   | 114.591   | 18.0    | 15.3 | 35.5 | 30.8 | 1.3  | 0.02 | 1.7  | 0.07 | 1.3  | 0.2</ |      |      |      |      |      |      |      |  |  |  |  |



















































|           |              |                                                                                                         |                                                              |                                                                                                                                                                                                                                                                                 |    |        |    |            |            |            |            |            |           |           |           |           |         |         |      |      |      |      |      |      |      |      |      |      |          |       |       |       |       |       |     |  |  |
|-----------|--------------|---------------------------------------------------------------------------------------------------------|--------------------------------------------------------------|---------------------------------------------------------------------------------------------------------------------------------------------------------------------------------------------------------------------------------------------------------------------------------|----|--------|----|------------|------------|------------|------------|------------|-----------|-----------|-----------|-----------|---------|---------|------|------|------|------|------|------|------|------|------|------|----------|-------|-------|-------|-------|-------|-----|--|--|
| P0009108  | NEUROD6      | cDNA FL56829, highly similar to Neurogenic differentiation factor 6                                     | 100.0%                                                       | VSEDAVIGK<br>9.5                                                                                                                                                                                                                                                                | 2  | 99.9%  | 1  | 4          | 5          | 1          | 6,796,719  | 7,049,679  | 6,403,817 | 7,475,513 | 937,673   | 450,901   | 520,520 | 221,244 | 30.9 | 14.3 | 18.2 | 6.6  | 1.0  | 0.8  | -1.1 | 0.7  | 1.1  | 0.5  | -1.1     | 0.4   | 1.1   | 0.4   | 1.2   | 0.09  |     |  |  |
|           |              |                                                                                                         |                                                              | GLAGEMSVW<br>SCSMAVLMR<br>SMVNLMR                                                                                                                                                                                                                                               | 2  | 100.0% | 2  |            |            |            |            |            |           |           |           |           |         |         |      |      |      |      |      |      |      |      |      |      |          |       |       |       |       |       |     |  |  |
| P0009134  | -            | cDNA FL60052, highly similar to Aldo-ketoreductase family 1 member C1                                   | 100.0%                                                       | YSEFLADVDQNFVYCLVR<br>34.9                                                                                                                                                                                                                                                      | 3  | 99.9%  | 3  | 3          | 2          | 2          | 2,023,524  | 1,955,966  | 1,822,512 | 2,328,492 | 245,452   | 118,935   | 116,514 | 76,865  | 27.1 | 13.6 | 14.3 | 7.4  | -1.0 | 0.8  | -1.1 | 0.5  | 1.2  | 0.3  | -1.1     | 0.4   | 1.2   | 0.03  | 1.3   | 0.007 |     |  |  |
| P0007872  | LOC100508006 | aldo-ketoreductase family 1 member C2-like isoform 4                                                    | 100.0%                                                       | 35.3                                                                                                                                                                                                                                                                            | 3  | 3      | 3  | 2          | 2          | 2,023,524  | 1,955,966  | 1,822,512  | 2,328,492 | 245,452   | 118,935   | 116,514   | 76,865  | 27.1    | 13.6 | 14.3 | 7.4  | -1.0 | 0.8  | -1.1 | 0.5  | 1.2  | 0.3  | -1.1 | 0.4      | 1.2   | 0.03  | 1.3   | 0.007 |       |     |  |  |
|           |              |                                                                                                         |                                                              | HDSAHLYNNEEQVGLAIR<br>LNEAFKFS<br>LNDGHFMPVLRGTYAPAEVK                                                                                                                                                                                                                          | 3  | 100.0% | 1  |            |            |            |            |            |           |           |           |           |         |         |      |      |      |      |      |      |      |      |      |      |          |       |       |       |       |       |     |  |  |
| P0009184  | LOC100508474 | 60S ribosomal protein L9-like, partial                                                                  | 100.0%                                                       | 21.2                                                                                                                                                                                                                                                                            | 1  | 9      | 2  | 1,200,204  | 2,247,448  | 1,761,684  | 2,391,854  | 202,974    | 127,115   | 128,623   | 129,998   | 21.4      | 12.7    | 16.3    | 12.2 | 1.1  | 0.8  | -1.2 | 0.2  | 1.1  | 0.3  | -1.3 | 0.03 | 1.1  | 0.4      | 1.4   | 0.009 |       |       |       |     |  |  |
| P00091834 | LOC100510447 | 60S ribosomal protein L9-like, partial                                                                  | 100.0%                                                       | 26.8                                                                                                                                                                                                                                                                            | 3  | 3      | 3  | 5          | 2,120,204  | 2,247,448  | 1,761,684  | 2,391,854  | 202,974   | 127,115   | 128,623   | 129,998   | 21.4    | 12.7    | 16.3 | 12.2 | 1.1  | 0.8  | -1.2 | 0.2  | 1.1  | 0.3  | -1.3 | 0.03 | 1.1      | 0.4   | 1.4   | 0.009 |       |       |     |  |  |
| P00091913 | RPL9         | cDNA FL32179, highly similar to 60S ribosomal protein L9                                                | 100.0%                                                       | 29.9                                                                                                                                                                                                                                                                            | 3  | 3      | 3  | 5          | 2,120,204  | 2,247,448  | 1,761,684  | 2,391,854  | 202,974   | 127,115   | 128,623   | 129,998   | 21.4    | 12.7    | 16.3 | 12.2 | 1.1  | 0.6  | -1.2 | 0.2  | 1.1  | 0.3  | -1.3 | 0.03 | 1.1      | 0.4   | 1.4   | 0.009 |       |       |     |  |  |
| P00091928 | RPL9         | cDNA FL31590, highly similar to 60S ribosomal protein L9                                                | 100.0%                                                       | 26.2                                                                                                                                                                                                                                                                            | 3  | 3      | 3  | 5          | 2,120,204  | 2,247,448  | 1,761,684  | 2,391,854  | 202,974   | 127,115   | 128,623   | 129,998   | 21.4    | 12.7    | 16.3 | 12.2 | 1.1  | 0.8  | -1.2 | 0.2  | 1.1  | 0.3  | -1.3 | 0.03 | 1.1      | 0.4   | 1.4   | 0.009 |       |       |     |  |  |
| P00095707 | RPL9         | Uncharacterized protein                                                                                 | 100.0%                                                       | 26.5                                                                                                                                                                                                                                                                            | 3  | 3      | 3  | 5          | 2,120,204  | 2,247,448  | 1,761,684  | 2,391,854  | 202,974   | 127,115   | 128,623   | 129,998   | 21.4    | 12.7    | 16.3 | 12.2 | 1.1  | 0.8  | -1.2 | 0.2  | 1.1  | 0.3  | -1.3 | 0.03 | 1.1      | 0.4   | 1.4   | 0.009 |       |       |     |  |  |
|           |              |                                                                                                         |                                                              | DFNNVVELLSLK<br>TCSHWNIK<br>TILSNQTYDPEVNDTLK                                                                                                                                                                                                                                   | 2  | 99.9%  | 1  |            |            |            |            |            |           |           |           |           |         |         |      |      |      |      |      |      |      |      |      |      |          |       |       |       |       |       |     |  |  |
| P00091940 | TUBB         | Tubulin beta chain                                                                                      | 100.0%                                                       | 39.0                                                                                                                                                                                                                                                                            | 10 | 13     | 22 | 1          | 71,510,111 | 70,941,215 | 72,119,157 | 82,892,500 | 7,684,526 | 2,935,646 | 6,002,388 | 2,018,075 | 24.0    | 9.3     | 18.6 | 5.4  | -1.0 | 0.9  | 1.0  | 1    | 1.2  | 0.2  | 1.0  | 0.9  | 1.2      | 0.01  | 1.1   | 0.2   | 0.1   | 0.2   |     |  |  |
|           |              |                                                                                                         |                                                              | ALVYVLRSTHDSVIR<br>ALTVPRLTQOVDFDK<br>EVHWAGGQGNQAK<br>FNEVDSKHGQYGYVHSRSDQLDR<br>GHYTEAEVDSVLDVVR<br>GHYTEAEVDSVLDVVR<br>EYVYNSATQDK<br>LTPFYGLDNLVYSATMSGVYTLR<br>MAVTFKNSIAGELFK<br>MAVTFKNSIAGELFK<br>MAVTFKNSIAGELFK<br>SGPFGQRPQNFYGGSGAGNNWAK<br>SGPFGQRPQNFYGGSGAGNNWAK | 2  | 99.8%  | 1  |            |            |            |            |            |           |           |           |           |         |         |      |      |      |      |      |      |      |      |      |      |          |       |       |       |       |       |     |  |  |
| P00091943 | DLD          | Dihydrodipolyl dehydrogenase                                                                            | 100.0%                                                       | 19.5                                                                                                                                                                                                                                                                            | 5  | 5      | 5  | 1          | 5,732,543  | 6,097,110  | 5,871,278  | 6,814,718  | 409,318   | 259,678   | 503,200   | 266,756   | 16.0    | 9.5     | 19.2 | 8.8  | 1.1  | 0.5  | 1.0  | 0.8  | 1.2  | 0.06 | -1.0 | 0.7  | 1.1      | 0.09  | 1.2   | 0.1   | 0.1   | 0.2   |     |  |  |
|           |              |                                                                                                         |                                                              | ALYGAHLK<br>FANLASSQK<br>IPNIYAQDVAAGPMLAK<br>NETLGLTCLNVSQPSK<br>VLGANLGGSGEYVNAALLEYGASCEIADR                                                                                                                                                                                 | 2  | 99.9%  | 1  |            |            |            |            |            |           |           |           |           |         |         |      |      |      |      |      |      |      |      |      |      |          |       |       |       |       |       |     |  |  |
| P0009218  | C2orf28      | cDNA FL57752                                                                                            | 100.0%                                                       | 6.3                                                                                                                                                                                                                                                                             | 1  | 1      | 2  | 1          | 1,254,148  | 1,435,240  | 1,207,965  | 1,426,923  | 145,767   | 108,286   | 152,369   | 100,183   | 26.0    | 16.9    | 28.2 | 15.7 | 1.1  | 0.3  | -1.0 | 0.8  | 1.1  | 0.4  | -1.2 | 0.3  | -1.0     | 1     | 1.2   | 0.3   |       |       |     |  |  |
| P00092941 | PCDH8        | cDNA FL60443, moderately similar to Protocadherin-8                                                     | 93.2%                                                        | 1                                                                                                                                                                                                                                                                               | 1  | 1      | 1  | 4,550,710  | 5,619,680  | 2,822,630  | 5,324,510  | 855,785    | 947,108   | 609,075   | 853,249   | 42.1      | 37.7    | 48.3    | 35.8 | 1.2  | 0.4  | -1.6 | 0.1  | 1.2  | 0.5  | -2.0 | 0.4  | -1.1 | 0.8      | 1.9   | 0.04  |       |       |       |     |  |  |
| P00092925 | DBP1         | LOC100293033                                                                                            | cDNA FL51165, highly similar to DNA damage-binding protein 1 | 100.0%                                                                                                                                                                                                                                                                          | 13 | 8      | 8  | 1          | 73,599,582 | 79,323,832 | 76,517,513 | 90,695,885 | 8,846,221 | 5,123,914 | 6,339,355 | 3,822,165 | 26.9    | 14.4    | 16.5 | 9.4  | 1.1  | 0.6  | 1.0  | 1.2  | 0.1  | 0.7  | -1.0 | 0.7  | 1.1      | 0.1   | 1.2   | 0.09  |       |       |     |  |  |
|           |              |                                                                                                         |                                                              | DLFATK<br>EMLGGEPK<br>GAVYSVEFNK<br>IEVQDGGTALRPSNSTCALSSVSSSK<br>LPSFELLK<br>LWFRNFK<br>SVLLAYVPEKGFEEIAR<br>VTLGTQPTVLR                                                                                                                                                       | 2  | 99.0%  | 1  |            |            |            |            |            |           |           |           |           |         |         |      |      |      |      |      |      |      |      |      |      |          |       |       |       |       |       |     |  |  |
| P00092976 | -            | cDNA FL56734, moderately similar to Septaplerin reductase                                               | 100.0%                                                       | 41.6                                                                                                                                                                                                                                                                            | 2  | 4      | 1  | 5,963,175  | 5,619,730  | 5,538,340  | 6,857,405  | 397,122    | 80,716    | 295,978   | 152,012   | 14.9      | 3.3     | 12.0    | 5.0  | -1.1 | 0.3  | -1.1 | 0.4  | 1.1  | 0.9  | 1.0  | 1    | 1.2  | 5.00E-05 | 1.2   | 0.004 |       |       |       |     |  |  |
|           |              |                                                                                                         |                                                              | QLEAEALGER<br>VPADLGAEGQLGLLGLR<br>VPADLGAEGQLGLLGLR                                                                                                                                                                                                                            | 2  | 98.1%  | 1  |            |            |            |            |            |           |           |           |           |         |         |      |      |      |      |      |      |      |      |      |      |          |       |       |       |       |       |     |  |  |
| P00092988 | -            | cDNA FL51596, moderately similar to Heterogeneous nuclear ribonucleoprotein A1                          | 100.0%                                                       | 40.9                                                                                                                                                                                                                                                                            | 9  | 12     | 1  | 9,057,258  | 9,382,653  | 9,138,962  | 9,833,125  | 474,688    | 297,922   | 434,837   | 216,389   | 11.7      | 7.1     | 10.6    | 4.9  | 1.0  | 0.6  | 1.0  | 0.9  | 1.1  | 0.2  | -1.0 | 0.7  | 1.0  | 0.3      | 1.1   | 0.2   | 0.1   | 0.2   |       |     |  |  |
|           |              |                                                                                                         |                                                              | GGFGYVATVEEDAMNAR<br>GGGFGNDQNR<br>KLFISGLFETTESLR<br>KLFISGLFETTESLR<br>LRFQSLFETTESLR<br>NGQSYGSSSSSYGSGR<br>SESPKPELRR<br>SGPFGQSGDYTFK<br>WGLTDCVYMR                                                                                                                        | 3  | 100.0% | 2  |            |            |            |            |            |           |           |           |           |         |         |      |      |      |      |      |      |      |      |      |      |          |       |       |       |       |       |     |  |  |
| P00092999 | KIF5B        | cDNA FL51288, highly similar to Kinesin heavy chain                                                     | 100.0%                                                       | 11.9                                                                                                                                                                                                                                                                            | 4  | 4      | 5  | 1          | 8,031,952  | 7,652,637  | 8,518,980  | 8,917,633  | 279,074   | 275,771   | 190,950   | 224,824   | 7.8     | 6.1     | 5.0  | 5.6  | -1.0 | 0.4  | 1.1  | 0.2  | 1.1  | 0.4  | 1.1  | 0.03 | 1.2      | 0.007 | 1.0   | 0.2   | 0.1   | 0.2   |     |  |  |
|           |              |                                                                                                         |                                                              | ISFLWNEGLTK<br>LTELQDQNK<br>GAVEEQGQSR<br>GLESVDAISEVGLR                                                                                                                                                                                                                        | 2  | 100.0% | 2  |            |            |            |            |            |           |           |           |           |         |         |      |      |      |      |      |      |      |      |      |      |          |       |       |       |       |       |     |  |  |
| P00093938 | -            | cDNA FL36992                                                                                            | 100.0%                                                       | 30.3                                                                                                                                                                                                                                                                            | 6  | 6      | 7  | 1          | 11,685,445 | 12,411,849 | 11,785,062 | 13,790,652 | 1,234,052 | 608,804   | 1,058,039 | 512,795   | 23.8    | 11.0    | 20.0 | 8.3  | 1.1  | 0.8  | 1.0  | 1    | 1.2  | 0.2  | -1.1 | 0.6  | 1.1      | 0.1   | 1.2   | 0.1   | 0.1   | 0.2   | 0.1 |  |  |
|           |              |                                                                                                         |                                                              | GVSDVAAFRG<br>LTVLVSVDYDK<br>LGNDFMGLASSQAVSNAR<br>LDDAMMAKSSVEFAK<br>SLAVYDNLGAK<br>VTLAVSLDK                                                                                                                                                                                  | 3  | 87.5%  | 1  |            |            |            |            |            |           |           |           |           |         |         |      |      |      |      |      |      |      |      |      |      |          |       |       |       |       |       |     |  |  |
| P00093938 | SCARB2       | lysosome membrane protein 2                                                                             | 98.9%                                                        | 6.6                                                                                                                                                                                                                                                                             | 2  | 2      | 2  | 1          | 3,022,275  | 3,068,445  | 2,982,170  | 3,386,420  | 128,324   | 195,772   | 141,881   | 149,969   | 9.5     | 14.3    | 10.6 | 9.9  | 1.0  | 0.8  | -1.0 | 0.8  | 1.1  | 0.1  | -1.0 | 0.7  | 1.1      | 0.2   | 1.1   | 0.09  |       |       |     |  |  |
|           |              |                                                                                                         |                                                              | KLDQVETQDR<br>VEEVGPYTR                                                                                                                                                                                                                                                         | 2  | 98.2%  | 1  |            |            |            |            |            |           |           |           |           |         |         |      |      |      |      |      |      |      |      |      |      |          |       |       |       |       |       |     |  |  |
| P00093966 | MYL8B        | cDNA FL60058, highly similar to Myosin light chain 1, slow-twitch muscle A isoform                      | 100.0%                                                       | 9.4                                                                                                                                                                                                                                                                             | 2  | 3      | 1  | 10,176,200 | 10,577,778 | 10,233,410 | 11,586,230 | 951,707    | 433,364   | 679,261   | 412,659   | 20.9      | 9.2     | 14.8    | 6.0  | 1.0  | 0.7  | 1.0  | 1    | 1.1  | 0.2  | -1.0 | 0.7  | 1.1  | 0.1      | 1.1   | 0.1   | 0.1   | 0.1   | 0.1   | 0.1 |  |  |
|           |              |                                                                                                         |                                                              | ALGGQFNAVLR<br>EAEFLDR                                                                                                                                                                                                                                                          | 2  | 100.0% | 2  |            |            |            |            |            |           |           |           |           |         |         |      |      |      |      |      |      |      |      |      |      |          |       |       |       |       |       |     |  |  |
| P00093983 | EPRS         | cDNA FL56021, highly similar to bifunctional aminoacyl-tRNA synthetase/Includes EPRS protein (Fragmant) | 100.0%                                                       | 9.1                                                                                                                                                                                                                                                                             | 6  | 6      | 2  | 17,058,253 | 17,457,490 | 16,476,100 | 19,518,563 | 1,064,901  | 751,640   | 1,237,324 | 491,971   | 14.0      | 9.6     | 16.8    | 5.6  | 1.0  | 0.8  | -1.0 | 0.7  | 1.1  | 0.07 | -1.1 | 0.5  | 1.1  | 0.05     | 1.2   | 0.05  | 0.5   | 0.5   | 0.5   | 0.5 |  |  |
|           |              |                                                                                                         |                                                              | HEELMLGPKLK<br>INEAEVLLSK<br>KQNDLQK<br>LNLNNTVLSK<br>TGDEYKQPPNPPAEGQSSSSSSSLSLEK<br>VFEQAEQAVSIVTK                                                                                                                                                                            | 2  | 99.1%  | 1  |            |            |            |            |            |           |           |           |           |         |         |      |      |      |      |      |      |      |      |      |      |          |       |       |       |       |       |     |  |  |
| P00094119 | CMPK1        | UMP-CMP kinase isoform b                                                                                | 100.0%                                                       | 20.7                                                                                                                                                                                                                                                                            | 3  | 4      | 7  | 1          | 6,888,627  | 7,487,306  | 7,098,572  | 9,540,989  | 1,701,344 | 1,073,532 | 1,013,515 | 419,253   | 55.4    | 32.1    | 31.9 | 9.8  | 1.1  | 0.6  | 1.0  | 0.9  | 1.4  | 0.2  | -1.1 | 0.8  | 1.3      | 0.1   | 1.3   | 0.06  |       |       |     |  |  |
|           |              |                                                                                                         |                                                              | KITLQSRIPRDIYEEGRK<br>SVQVYVQVQK<br>SVDEVFDEVQVDFKDG<br>SVDEVFDEVQVDFKDG                                                                                                                                                                                                        | 3  | 100.0% | 2  |            |            |            |            |            |           |           |           |           |         |         |      |      |      |      |      |      |      |      |      |      |          |       |       |       |       |       |     |  |  |
| P00094933 | -            | cDNA FL54812, moderately similar to Mannose-6-phosphate isomerase                                       | 100.0%                                                       | 7.0                                                                                                                                                                                                                                                                             | 1  | 1      | 1  | 1          | 618,894    | 641,312    | 679,510    | 743,192    | 41,089    | 29,840    | 43,369    | 58,120    | 14.9    | 10.4    | 14.3 | 17.5 | 1.0  | 0.7  | 1.1  | 0.3  | 1.2  | 0.1  | 1.1  | 0.5  | 1.2      | 0.2   | 1.1   | 0.4   |       |       |     |  |  |
|           |              |                                                                                                         |                                                              | TLSSWAENQDLSGSK<br>43.9                                                                                                                                                                                                                                                         | 2  | 100.0% | 1  |            |            |            |            |            |           |           |           |           |         |         |      |      |      |      |      |      |      |      |      |      |          |       |       |       |       |       |     |  |  |
| P00094945 | HSPB1        | Uncharacterized protein                                                                                 | 100.0%                                                       | 4                                                                                                                                                                                                                                                                               | 4  | 4      | 1  | 6,381,090  | 7,085,216  | 6,774,100  | 7,850,375  | 535,789    | 231,411   | 617,984   | 387,121   | 16.8      | 7.3     | 17.1    | 11.0 | 1.1  | 0.3  | 1.1  | 0.6  | 1.2  | 0.06 | -1.0 | 0.6  | 1.1  | 0.1      | 1.2   | 0.1   | 0.1   | 0.1   | 0.1   |     |  |  |

|           |         |                                                                                    |        |                          |   |        |    |           |           |            |           |            |         |         |         |         |      |      |      |      |      |      |      |      |     |      |      |     |     |      |      |      |  |
|-----------|---------|------------------------------------------------------------------------------------|--------|--------------------------|---|--------|----|-----------|-----------|------------|-----------|------------|---------|---------|---------|---------|------|------|------|------|------|------|------|------|-----|------|------|-----|-----|------|------|------|--|
| P0009674  | EPSL2   | cDNA FLJ55025, highly similar to Epidermal growth factor receptor kinase substrate | 100.0% | 6.6                      | 2 | 2      | 2  | 1         | 2,361,837 | 2,459,752  | 2,034,495 | 2,612,882  | 207,189 | 181,289 | 202,275 | 164,091 | 19.6 | 16.5 | 22.2 | 14.0 | 1.0  | 0.7  | -1.2 | 0.3  | 1.1 | 0.4  | -1.2 | 0.2 | 1.1 | 0.5  | 1.3  | 0.06 |  |
|           |         |                                                                                    |        | WYDEMLQVNDGSLR           | 3 | 95.5%  | 1  |           |           |            |           |            |         |         |         |         |      |      |      |      |      |      |      |      |     |      |      |     |     |      |      |      |  |
|           |         |                                                                                    |        | SEATSYVDKDR              | 2 | 99.7%  | 1  |           |           |            |           |            |         |         |         |         |      |      |      |      |      |      |      |      |     |      |      |     |     |      |      |      |  |
| P0009678  | LASP1   | cDNA FLJ1834, highly similar to LIM and SH3 domain protein 1                       | 100.0% | 10.7                     | 2 | 2      | 4  | 1         | 2,936,978 | 3,040,963  | 2,936,967 | 3,270,457  | 214,879 | 105,363 | 174,389 | 41,000  | 16.4 | 7.8  | 13.3 | 2.8  | 1.0  | 0.7  | -1.0 | 1.1  | 1.1 | 0.2  | -1.0 | 0.6 | 1.1 | 0.1  | 1.1  | 0.1  |  |
|           |         |                                                                                    |        | GFSDVADPELGR             | 2 | 100.0% | 2  |           |           |            |           |            |         |         |         |         |      |      |      |      |      |      |      |      |     |      |      |     |     |      |      |      |  |
|           |         |                                                                                    |        | TGDGSSNK                 | 2 | 100.0% | 2  |           |           |            |           |            |         |         |         |         |      |      |      |      |      |      |      |      |     |      |      |     |     |      |      |      |  |
| P0009683  | -       | Serine hydroxymethyltransferase                                                    | 100.0% | 28.8                     | 8 | 8      | 11 | 1         | 5,625,977 | 5,428,854  | 6,072,201 | 6,311,316  | 515,820 | 214,938 | 386,121 | 379,589 | 20.5 | 8.9  | 14.2 | 13.5 | -1.0 | 0.7  | 1.1  | 0.5  | 1.1 | 0.3  | 1.1  | 0.2 | 1.2 | 0.08 | 1.0  | 0.7  |  |
|           |         |                                                                                    |        | ALALGSCFLNNK             | 2 | 100.0% | 2  |           |           |            |           |            |         |         |         |         |      |      |      |      |      |      |      |      |     |      |      |     |     |      |      |      |  |
|           |         |                                                                                    |        | AMADALLR                 | 2 | 99.0%  | 1  |           |           |            |           |            |         |         |         |         |      |      |      |      |      |      |      |      |     |      |      |     |     |      |      |      |  |
|           |         |                                                                                    |        | CSQLVMRAKQHSNATQITGGEAR  | 3 | 93.4%  | 1  |           |           |            |           |            |         |         |         |         |      |      |      |      |      |      |      |      |     |      |      |     |     |      |      |      |  |
|           |         |                                                                                    |        | GLELIASENCSR             | 2 | 98.5%  | 1  |           |           |            |           |            |         |         |         |         |      |      |      |      |      |      |      |      |     |      |      |     |     |      |      |      |  |
|           |         |                                                                                    |        | IMGLDQPDGSHLTHYMSDGVKR   | 3 | 85.6%  | 1  |           |           |            |           |            |         |         |         |         |      |      |      |      |      |      |      |      |     |      |      |     |     |      |      |      |  |
|           |         |                                                                                    |        | TSATSIFFESMPYK           | 2 | 100.0% | 2  |           |           |            |           |            |         |         |         |         |      |      |      |      |      |      |      |      |     |      |      |     |     |      |      |      |  |
|           |         |                                                                                    |        | VLELVSTANK               | 2 | 100.0% | 2  |           |           |            |           |            |         |         |         |         |      |      |      |      |      |      |      |      |     |      |      |     |     |      |      |      |  |
|           |         |                                                                                    |        | VDFRANWLEVIK             | 2 | 100.0% | 2  |           |           |            |           |            |         |         |         |         |      |      |      |      |      |      |      |      |     |      |      |     |     |      |      |      |  |
| P0009688  | SCP2    | cDNA FLJ6896, highly similar to Non-specific lipid-transfer protein                | 100.0% | 35.7                     | 5 | 6      | 8  | 1         | 6,430,287 | 6,690,388  | 7,494,021 | 6,782,316  | 266,810 | 493,523 | 548,316 | 750,050 | 9.3  | 16.5 | 16.4 | 24.7 | 1.0  | 0.7  | 1.2  | 0.1  | 1.1 | 0.7  | 1.1  | 0.3 | 1.0 | 0.9  | -1.1 | 0.5  |  |
|           |         |                                                                                    |        | ADCHTITMADSDFLMGTGR      | 2 | 100.0% | 1  |           |           |            |           |            |         |         |         |         |      |      |      |      |      |      |      |      |     |      |      |     |     |      |      |      |  |
|           |         |                                                                                    |        | EATWYVDK                 | 2 | 99.0%  | 2  |           |           |            |           |            |         |         |         |         |      |      |      |      |      |      |      |      |     |      |      |     |     |      |      |      |  |
|           |         |                                                                                    |        | NGGFAPK                  | 2 | 100.0% | 1  |           |           |            |           |            |         |         |         |         |      |      |      |      |      |      |      |      |     |      |      |     |     |      |      |      |  |
|           |         |                                                                                    |        | KLEEGEGFVK               | 2 | 100.0% | 2  |           |           |            |           |            |         |         |         |         |      |      |      |      |      |      |      |      |     |      |      |     |     |      |      |      |  |
|           |         |                                                                                    |        | KLEEGEGFVK               | 2 | 100.0% | 1  |           |           |            |           |            |         |         |         |         |      |      |      |      |      |      |      |      |     |      |      |     |     |      |      |      |  |
|           |         |                                                                                    |        | KLEEGEGFVK               | 3 | 100.0% | 1  |           |           |            |           |            |         |         |         |         |      |      |      |      |      |      |      |      |     |      |      |     |     |      |      |      |  |
| P0009694  | ALDH7A1 | alpha-aminoacidic semialdehyde dehydrogenase isoform 3                             | 100.0% | 17.5                     | 6 | 6      | 8  | 1         | 8,861,561 | 9,055,768  | 9,011,640 | 10,054,224 | 661,239 | 349,274 | 589,558 | 375,688 | 16.7 | 8.6  | 14.6 | 8.4  | 1.0  | 0.8  | 1.0  | 0.9  | 1.1 | 0.2  | -1.0 | 1   | 1.1 | 0.09 | 1.1  | 0.2  |  |
|           |         |                                                                                    |        | ELQKREEMGKYNYSWGGGR      | 3 | 100.0% | 1  |           |           |            |           |            |         |         |         |         |      |      |      |      |      |      |      |      |     |      |      |     |     |      |      |      |  |
|           |         |                                                                                    |        | GAPPTLSLSVAVIK           | 2 | 100.0% | 2  |           |           |            |           |            |         |         |         |         |      |      |      |      |      |      |      |      |     |      |      |     |     |      |      |      |  |
|           |         |                                                                                    |        | GEVITTYCPANNEPIAR        | 2 | 100.0% | 1  |           |           |            |           |            |         |         |         |         |      |      |      |      |      |      |      |      |     |      |      |     |     |      |      |      |  |
|           |         |                                                                                    |        | IQVLGSLVLEEMK            | 2 | 100.0% | 1  |           |           |            |           |            |         |         |         |         |      |      |      |      |      |      |      |      |     |      |      |     |     |      |      |      |  |
|           |         |                                                                                    |        | QGLSSSIFIK               | 2 | 99.9%  | 1  |           |           |            |           |            |         |         |         |         |      |      |      |      |      |      |      |      |     |      |      |     |     |      |      |      |  |
|           |         |                                                                                    |        | VNLLSFTSTGVGK            | 2 | 100.0% | 2  |           |           |            |           |            |         |         |         |         |      |      |      |      |      |      |      |      |     |      |      |     |     |      |      |      |  |
| P00096971 | VCL     | cDNA FLJ33006, highly similar to Vinculin                                          | 100.0% | 6.0                      | 3 | 3      | 4  | 1         | 1,236,658 | 1,389,341  | 1,091,012 | 1,572,082  | 84,002  | 54,826  | 264,078 | 86,318  | 11.8 | 8.8  | 37.1 | 12.3 | 1.1  | 0.09 | 1.3  | 0.3  | 1.3 | 0.01 | 1.1  | 0.6 | 1.1 | 0.1  | -1.0 | 0.9  |  |
|           |         |                                                                                    |        | AGEVINGPMMMAAR           | 2 | 99.0%  | 1  |           |           |            |           |            |         |         |         |         |      |      |      |      |      |      |      |      |     |      |      |     |     |      |      |      |  |
|           |         |                                                                                    |        | APDLPAPVAAYQVAVSNLVR     | 2 | 100.0% | 2  |           |           |            |           |            |         |         |         |         |      |      |      |      |      |      |      |      |     |      |      |     |     |      |      |      |  |
|           |         |                                                                                    |        | TNSDFEESGALTELVNKKMNSDVK | 3 | 100.0% | 1  |           |           |            |           |            |         |         |         |         |      |      |      |      |      |      |      |      |     |      |      |     |     |      |      |      |  |
| P00096971 | ARL6P5  | cDNA FLJ1702, moderately similar to PRA1 family protein 3                          | 100.0% | 8.1                      | 1 | 1      | 1  | 3         | 2,543,302 | 2,439,556  | 2,322,208 | 2,801,500  | 216,651 | 162,678 | 154,301 | 184,482 | 19.1 | 16.7 | 14.9 | 14.7 | -1.0 | 0.7  | -1.1 | 0.4  | 1.1 | 0.4  | -1.1 | 0.6 | 1.1 | 0.2  | 1.2  | 0.08 |  |
| P00045943 | ARL6P5  | 10 kDa protein                                                                     | 100.0% | 11.8                     | 1 | 1      | 1  | 3         | 2,543,302 | 2,439,556  | 2,322,208 | 2,801,500  | 216,651 | 162,678 | 154,301 | 184,482 | 19.1 | 16.7 | 14.9 | 14.7 | -1.0 | 0.7  | -1.1 | 0.4  | 1.1 | 0.4  | -1.1 | 0.6 | 1.1 | 0.2  | 1.2  | 0.08 |  |
| P00046221 | ARL6P5  | Uncharacterized protein                                                            | 100.0% | 12.5                     | 1 | 1      | 1  | 3         | 2,543,302 | 2,439,556  | 2,322,208 | 2,801,500  | 216,651 | 162,678 | 154,301 | 184,482 | 19.1 | 16.7 | 14.9 | 14.7 | -1.0 | 0.7  | -1.1 | 0.4  | 1.1 | 0.4  | -1.1 | 0.6 | 1.1 | 0.2  | 1.2  | 0.08 |  |
| P00096972 | PHB     | cDNA FLJ1582, highly similar to Prohibitin                                         | 100.0% | 14.2                     | 2 | 3      | 1  | 1,972,822 | 1,945,910 | 2,140,315  | 2,045,162 | 83,523     | 54,243  | 55,959  | 34,835  | 9.5     | 6.2  | 5.9  | 3.8  | -1.0 | 0.8  | 1.1  | 0.1  | 1.0  | 0.4 | 1.1  | 0.04 | 1.1 | 0.2 | -1.0 | 0.2  |      |  |
|           |         |                                                                                    |        | DQANLITLR                | 2 | 100.0% | 2  |           |           |            |           |            |         |         |         |         |      |      |      |      |      |      |      |      |     |      |      |     |     |      |      |      |  |
|           |         |                                                                                    |        | ILFRVPAQSLR              | 2 | 98.5%  | 1  |           |           |            |           |            |         |         |         |         |      |      |      |      |      |      |      |      |     |      |      |     |     |      |      |      |  |
| P00096978 | AP2B1   | cDNA FLJ54516, highly similar to Adapter-related protein complex 2 beta-1 subunit  | 100.0% | 10.0                     | 3 | 3      | 1  | 1,503,575 | 1,300,096 | 1,489,093  | 1,489,516 | 94,219     | 61,908  | 96,638  | 84,890  | 14.0    | 10.6 | 14.8 | 12.7 | -1.2 | 0.1  | -1.0 | 0.9  | -1.0 | 0.9 | 1.1  | 0.1  | 1.1 | 0.1 | 1.0  | 1    |      |  |
|           |         |                                                                                    |        | LTNGLVALLR               | 2 | 100.0% | 1  |           |           |            |           |            |         |         |         |         |      |      |      |      |      |      |      |      |     |      |      |     |     |      |      |      |  |
|           |         |                                                                                    |        | MEPLNLLQVAVK             | 2 | 99.8%  | 1  |           |           |            |           |            |         |         |         |         |      |      |      |      |      |      |      |      |     |      |      |     |     |      |      |      |  |
|           |         |                                                                                    |        | NVEGDGMLVGLSK            | 2 | 100.0% | 1  |           |           |            |           |            |         |         |         |         |      |      |      |      |      |      |      |      |     |      |      |     |     |      |      |      |  |
| P00096978 | PSM5    | cDNA FLJ2677, highly similar to 26S proteasome non-ATPase regulatory subunit 5     | 100.0% | 4.2                      | 4 | 4      | 4  | 1         | 9,827,700 | 10,129,350 | 9,826,980 | 11,132,200 | 716,678 | 513,060 | 568,519 | 489,201 | 16.3 | 11.3 | 12.9 | 9.8  | 1.0  | 0.7  | -1.0 | 1.1  | 1.1 | 0.2  | -1.0 | 0.7 | 1.1 | 0.2  | 1.1  | 0.1  |  |
|           |         |                                                                                    |        | ILTSQGR                  | 2 | 96.9%  | 1  |           |           |            |           |            |         |         |         |         |      |      |      |      |      |      |      |      |     |      |      |     |     |      |      |      |  |
|           |         |                                                                                    |        | IVNSDVTLEINAEELK         | 2 | 100.0% | 1  |           |           |            |           |            |         |         |         |         |      |      |      |      |      |      |      |      |     |      |      |     |     |      |      |      |  |
|           |         |                                                                                    |        | LMWNSPVEVYVDGR           | 2 | 98.6%  | 1  |           |           |            |           |            |         |         |         |         |      |      |      |      |      |      |      |      |     |      |      |     |     |      |      |      |  |
|           |         |                                                                                    |        | THAEFGNRYLR              | 2 | 100.0% | 1  |           |           |            |           |            |         |         |         |         |      |      |      |      |      |      |      |      |     |      |      |     |     |      |      |      |  |
| P00096974 | PRPF40A | Uncharacterized protein                                                            | 100.0% | 4                        | 3 | 3      | 2  | 1         | 3,670,660 | 3,371,462  | 3,021,062 | 3,756,298  | 346,422 | 95,665  | 354,108 | 983,182 | 21.1 | 6.3  | 26.2 | 22.8 | -1.1 | 0.4  | -1.2 | 0.2  | 1.0 | 0.9  | -1.1 | 0.4 | 1.1 | 0.4  | 1.2  | 0.2  |  |
|           |         |                                                                                    |        | FVKEPFAFDITLESER         | 3 | 99.9%  | 1  |           |           |            |           |            |         |         |         |         |      |      |      |      |      |      |      |      |     |      |      |     |     |      |      |      |  |
|           |         |                                                                                    |        | LAFNSLR                  | 2 | 99.7%  | 1  |           |           |            |           |            |         |         |         |         |      |      |      |      |      |      |      |      |     |      |      |     |     |      |      |      |  |
| P00096974 | DEK     | cDNA FLJ3031, highly similar to Protein DEK                                        | 100.0% | 7.2                      | 2 | 2      | 2  | 2         | 2,759,955 | 2,982,959  | 2,747,669 | 3,145,225  | 278,060 | 126,687 | 160,744 | 136,173 | 22.5 | 9.5  | 13.1 | 9.8  | 1.1  | 0.5  | -1.0 | 1.1  | 1.1 | 0.2  | -1.1 | 0.3 | 1.1 | 0.4  | 1.1  | 0.1  |  |















|            |         |                                                                              |        |                                |    |        |    |   |            |            |            |            |           |           |           |           |      |      |      |      |      |     |      |     |     |      |      |      |     |      |      |      |  |  |
|------------|---------|------------------------------------------------------------------------------|--------|--------------------------------|----|--------|----|---|------------|------------|------------|------------|-----------|-----------|-----------|-----------|------|------|------|------|------|-----|------|-----|-----|------|------|------|-----|------|------|------|--|--|
| P10025734  | NOSTRIN | 11 kDa protein                                                               | 91.7%  | 18.6                           | 1  | 1      | 1  | 1 | 1,445,722  | 1,250,538  | 1,662,373  | 1,607,021  | 167,293   | 72,519    | 184,566   | 228,534   | 25.9 | 13.0 | 24.8 | 31.8 | -1.2 | 0.3 | 1.1  | 0.4 | 1.1 | 0.6  | 1.3  | 0.09 | 1.3 | 0.2  | -1.0 | 0.9  |  |  |
|            |         |                                                                              |        | QVTSVAGQRDGVLLLR               | 3  | 91.7%  | 1  |   |            |            |            |            |           |           |           |           |      |      |      |      |      |     |      |     |     |      |      |      |     |      |      |      |  |  |
| P10025798  | PSMA2   | 5 kDa protein                                                                | 100.0% | 72.9                           | 2  | 100.0% | 3  | 1 | 12,324,733 | 15,426,517 | 15,433,227 | 19,479,160 | 1,718,444 | 1,505,911 | 1,297,953 | 1,417,168 | 31.2 | 21.8 | 18.2 | 16.3 | 1.3  | 0.2 | 1.3  | 0.2 | 1.6 | 0.01 | 1.0  | 1    | 1.3 | 0.09 | 1.3  | 0.07 |  |  |
|            |         |                                                                              |        | GVYSFLTFSPFGK                  | 2  | 100.0% | 1  |   |            |            |            |            |           |           |           |           |      |      |      |      |      |     |      |     |     |      |      |      |     |      |      |      |  |  |
|            |         |                                                                              |        | LVQEYALAAVAGAPGVGK             | 2  | 99.9%  | 1  |   |            |            |            |            |           |           |           |           |      |      |      |      |      |     |      |     |     |      |      |      |     |      |      |      |  |  |
|            |         |                                                                              |        | LVQEYALAAVAGAPGVGK             | 3  | 100.0% | 1  |   |            |            |            |            |           |           |           |           |      |      |      |      |      |     |      |     |     |      |      |      |     |      |      |      |  |  |
| P10025804  | AIP     | Non-functional aryl hydrocarbon receptor interacting protein (fragment)      | 100.0% | 13.4                           | 4  | 4      | 4  | 2 | 20,678,604 | 24,198,662 | 23,608,395 | 28,231,270 | 3,549,534 | 1,642,280 | 1,677,368 | 1,550,684 | 38.4 | 15.2 | 15.9 | 12.3 | 1.2  | 0.4 | 1.1  | 0.5 | 1.4 | 0.09 | -1.0 | 0.8  | 1.2 | 0.1  | 1.2  | 0.08 |  |  |
| P10025822  | AIP     | Aryl hydrocarbon receptor interacting protein                                | 100.0% | 13.4                           | 4  | 4      | 4  | 2 | 20,678,604 | 24,198,662 | 23,608,395 | 28,231,270 | 3,549,534 | 1,642,280 | 1,677,368 | 1,550,684 | 38.4 | 15.2 | 15.9 | 12.3 | 1.2  | 0.4 | 1.1  | 0.5 | 1.4 | 0.09 | -1.0 | 0.8  | 1.2 | 0.1  | 1.2  | 0.08 |  |  |
|            |         |                                                                              |        | EGGIMAGLQCK                    | 2  | 100.0% | 1  |   |            |            |            |            |           |           |           |           |      |      |      |      |      |     |      |     |     |      |      |      |     |      |      |      |  |  |
|            |         |                                                                              |        | WVLYPLVAK                      | 2  | 99.9%  | 1  |   |            |            |            |            |           |           |           |           |      |      |      |      |      |     |      |     |     |      |      |      |     |      |      |      |  |  |
|            |         |                                                                              |        | VLELDLAPLVISR                  | 2  | 99.9%  | 1  |   |            |            |            |            |           |           |           |           |      |      |      |      |      |     |      |     |     |      |      |      |     |      |      |      |  |  |
|            |         |                                                                              |        | YIDAKGK                        | 2  | 99.9%  | 1  |   |            |            |            |            |           |           |           |           |      |      |      |      |      |     |      |     |     |      |      |      |     |      |      |      |  |  |
| P10025920  | ARPC2   | 10 kDa protein                                                               | 93.3%  | 13.2                           | 1  | 1      | 1  | 2 | 662,963    | 642,343    | 679,673    | 802,455    | 47,816    | 38,368    | 38,189    | 54,916    | 16.1 | 13.4 | 12.6 | 15.3 | -1.0 | 0.7 | 1.0  | 0.8 | 1.2 | 0.09 | 1.1  | 0.5  | 1.2 | 0.04 | 1.2  | 0.1  |  |  |
| P10025831  | ARPC2   | Uncharacterized protein                                                      | 93.3%  | 13.3                           | 1  | 1      | 1  | 2 | 662,963    | 642,343    | 679,673    | 802,455    | 47,816    | 38,368    | 38,189    | 54,916    | 16.1 | 13.4 | 12.6 | 15.3 | -1.0 | 0.7 | 1.0  | 0.8 | 1.2 | 0.09 | 1.1  | 0.5  | 1.2 | 0.04 | 1.2  | 0.1  |  |  |
|            |         |                                                                              |        | ELQVRSKLLK                     | 2  | 93.3%  | 1  |   |            |            |            |            |           |           |           |           |      |      |      |      |      |     |      |     |     |      |      |      |     |      |      |      |  |  |
| P10025997  | SRI     | cDNA FLJ54267, moderately similar to Sorcin                                  | 100.0% | 34.2                           | 5  | 5      | 6  | 1 | 7,288,805  | 8,580,122  | 8,700,562  | 10,243,352 | 938,351   | 529,636   | 558,435   | 574,715   | 28.9 | 13.8 | 14.4 | 12.6 | 1.2  | 0.3 | 1.2  | 0.2 | 1.4 | 0.03 | 1.0  | 0.9  | 1.2 | 0.07 | 1.2  | 0.09 |  |  |
|            |         |                                                                              |        | DMSSGTMGFEFK                   | 2  | 98.9%  | 1  |   |            |            |            |            |           |           |           |           |      |      |      |      |      |     |      |     |     |      |      |      |     |      |      |      |  |  |
|            |         |                                                                              |        | DTAQGVVNFVDFDQVDSVSR           | 2  | 90.1%  | 1  |   |            |            |            |            |           |           |           |           |      |      |      |      |      |     |      |     |     |      |      |      |     |      |      |      |  |  |
|            |         |                                                                              |        | ITFDYVACGVK                    | 2  | 100.0% | 2  |   |            |            |            |            |           |           |           |           |      |      |      |      |      |     |      |     |     |      |      |      |     |      |      |      |  |  |
|            |         |                                                                              |        | LMVSNALDR                      | 2  | 99.9%  | 1  |   |            |            |            |            |           |           |           |           |      |      |      |      |      |     |      |     |     |      |      |      |     |      |      |      |  |  |
|            |         |                                                                              |        | LMVSNLDRKQKSTMGFEFK            | 3  | 99.9%  | 1  |   |            |            |            |            |           |           |           |           |      |      |      |      |      |     |      |     |     |      |      |      |     |      |      |      |  |  |
| P10026027  | GLB1    | Uncharacterized protein                                                      | 91.5%  | 17.5                           | 1  | 1      | 1  | 1 | 72,170     | 69,224     | 64,026     | 98,035     | 10,833    | 7,268     | 8,130     | 7,396     | 33.8 | 23.5 | 28.4 | 18.8 | -1.0 | 0.8 | -1.1 | 0.6 | 1.2 | 0.3  | -1.1 | 0.6  | 1.3 | 0.1  | 1.4  | 0.06 |  |  |
|            |         |                                                                              |        | SSDPYAAVQKWLGLVLPK             | 3  | 91.5%  | 1  | 1 |            |            |            |            |           |           |           |           |      |      |      |      |      |     |      |     |     |      |      |      |     |      |      |      |  |  |
| P10026178  | LLZP8   | Uncharacterized protein                                                      | 100.0% | 17.4                           | 2  | 2      | 4  | 1 | 4,656,385  | 4,751,655  | 4,489,585  | 5,185,680  | 423,780   | 255,112   | 358,613   | 99,340    | 20.4 | 12.0 | 17.8 | 4.3  | 1.0  | 0.9 | -1.0 | 0.8 | 1.1 | 0.3  | -1.1 | 0.6  | 1.1 | 0.2  | 1.2  | 0.1  |  |  |
|            |         |                                                                              |        | GPQDLAFEAATDQNAIK              | 2  | 100.0% | 2  |   |            |            |            |            |           |           |           |           |      |      |      |      |      |     |      |     |     |      |      |      |     |      |      |      |  |  |
|            |         |                                                                              |        | NGQDLEVDKYVAK                  | 2  | 100.0% | 2  |   |            |            |            |            |           |           |           |           |      |      |      |      |      |     |      |     |     |      |      |      |     |      |      |      |  |  |
| P10026202  | RPL15   | Ribosomal protein L15                                                        | 100.0% | 18.3                           | 3  | 3      | 4  | 1 | 4,889,743  | 5,709,832  | 5,694,563  | 6,221,687  | 494,380   | 218,525   | 602,452   | 172,064   | 22.6 | 8.6  | 23.7 | 6.2  | 1.2  | 0.2 | 1.2  | 0.3 | 1.3 | 0.05 | -1.0 | 1    | 1.1 | 0.1  | 1.1  | 0.4  |  |  |
|            |         |                                                                              |        | FFEVLDPPHK                     | 2  | 84.1%  | 1  |   |            |            |            |            |           |           |           |           |      |      |      |      |      |     |      |     |     |      |      |      |     |      |      |      |  |  |
|            |         |                                                                              |        | FFEVLDPPHK                     | 3  | 100.0% | 1  |   |            |            |            |            |           |           |           |           |      |      |      |      |      |     |      |     |     |      |      |      |     |      |      |      |  |  |
|            |         |                                                                              |        | WVNSVYGGESYVK                  | 2  | 100.0% | 2  |   |            |            |            |            |           |           |           |           |      |      |      |      |      |     |      |     |     |      |      |      |     |      |      |      |  |  |
|            |         |                                                                              |        | YQGLWR                         | 2  | 99.3%  | 1  |   |            |            |            |            |           |           |           |           |      |      |      |      |      |     |      |     |     |      |      |      |     |      |      |      |  |  |
| P10026258  | PSMD2   | Uncharacterized protein                                                      | 100.0% | 18.3                           | 10 | 11     | 11 | 2 | 12,908,339 | 14,205,413 | 13,451,525 | 15,362,605 | 1,010,880 | 316,534   | 930,454   | 348,529   | 17.5 | 5.0  | 15.5 | 5.1  | 1.1  | 0.3 | 1.0  | 0.7 | 1.2 | 0.07 | -1.1 | 0.5  | 1.1 | 0.04 | 1.1  | 0.1  |  |  |
| P10026411  | PSMD2   | Uncharacterized protein                                                      | 100.0% | 18.0                           | 11 | 11     | 11 | 2 | 12,908,339 | 14,205,413 | 13,451,525 | 15,362,605 | 1,010,880 | 316,534   | 930,454   | 348,529   | 17.5 | 5.0  | 15.5 | 5.1  | 1.1  | 0.3 | 1.0  | 0.7 | 1.2 | 0.07 | -1.1 | 0.5  | 1.1 | 0.04 | 1.1  | 0.1  |  |  |
|            |         |                                                                              |        | AVPLALALVSNPR                  | 2  | 98.6%  | 1  |   |            |            |            |            |           |           |           |           |      |      |      |      |      |     |      |     |     |      |      |      |     |      |      |      |  |  |
|            |         |                                                                              |        | LAGDLTLEK                      | 2  | 81.0%  | 1  |   |            |            |            |            |           |           |           |           |      |      |      |      |      |     |      |     |     |      |      |      |     |      |      |      |  |  |
|            |         |                                                                              |        | MVTELEPEKPRVIVSR               | 3  | 97.8%  | 1  |   |            |            |            |            |           |           |           |           |      |      |      |      |      |     |      |     |     |      |      |      |     |      |      |      |  |  |
|            |         |                                                                              |        | MNLASSVNGFVNAAFGQDK            | 2  | 100.0% | 1  |   |            |            |            |            |           |           |           |           |      |      |      |      |      |     |      |     |     |      |      |      |     |      |      |      |  |  |
|            |         |                                                                              |        | MNLASSVNGFVNAAFGQDK            | 3  | 98.4%  | 1  |   |            |            |            |            |           |           |           |           |      |      |      |      |      |     |      |     |     |      |      |      |     |      |      |      |  |  |
|            |         |                                                                              |        | NECPKALLLSVYVNSGTHR            | 3  | 92.7%  | 1  |   |            |            |            |            |           |           |           |           |      |      |      |      |      |     |      |     |     |      |      |      |     |      |      |      |  |  |
|            |         |                                                                              |        | SETLKDITYR                     | 2  | 91.6%  | 1  |   |            |            |            |            |           |           |           |           |      |      |      |      |      |     |      |     |     |      |      |      |     |      |      |      |  |  |
|            |         |                                                                              |        | SGALLGQVNSGVR                  | 2  | 100.0% | 1  |   |            |            |            |            |           |           |           |           |      |      |      |      |      |     |      |     |     |      |      |      |     |      |      |      |  |  |
|            |         |                                                                              |        | VGGAVVYGGKAGKPK                | 3  | 99.0%  | 1  |   |            |            |            |            |           |           |           |           |      |      |      |      |      |     |      |     |     |      |      |      |     |      |      |      |  |  |
|            |         |                                                                              |        | YGEPTLR                        | 2  | 88.6%  | 1  |   |            |            |            |            |           |           |           |           |      |      |      |      |      |     |      |     |     |      |      |      |     |      |      |      |  |  |
|            |         |                                                                              |        | YLVSYEDTK                      | 2  | 99.9%  | 1  |   |            |            |            |            |           |           |           |           |      |      |      |      |      |     |      |     |     |      |      |      |     |      |      |      |  |  |
| P10026311  | DLD     | cDNA FLJ55112, highly similar to Dihydropyridyl dehydrogenase, mitochondrial | 100.0% | 6.9                            | 4  | 4      | 4  | 2 | 3,833,550  | 4,116,167  | 3,911,388  | 4,610,288  | 257,237   | 142,067   | 345,886   | 206,311   | 15.0 | 7.7  | 19.8 | 10.0 | 1.1  | 0.4 | 1.0  | 0.9 | 1.2 | 0.05 | -1.1 | 0.6  | 1.1 | 0.08 | 1.2  | 0.1  |  |  |
| P101011882 | DLD     | cDNA FLJ55115, highly similar to Dihydropyridyl dehydrogenase, mitochondrial | 100.0% | 17.8                           | 4  | 4      | 4  | 2 | 3,833,550  | 4,116,167  | 3,911,388  | 4,610,288  | 257,237   | 142,067   | 345,886   | 206,311   | 15.0 | 7.7  | 19.8 | 10.0 | 1.1  | 0.4 | 1.0  | 0.9 | 1.2 | 0.05 | -1.1 | 0.6  | 1.1 | 0.08 | 1.2  | 0.1  |  |  |
|            |         |                                                                              |        | ALYGGQHLK                      | 2  | 99.9%  | 1  |   |            |            |            |            |           |           |           |           |      |      |      |      |      |     |      |     |     |      |      |      |     |      |      |      |  |  |
|            |         |                                                                              |        | EALNANFSK                      | 2  | 99.3%  | 1  |   |            |            |            |            |           |           |           |           |      |      |      |      |      |     |      |     |     |      |      |      |     |      |      |      |  |  |
|            |         |                                                                              |        | IPNHYAGDVVAGPMLAKH             | 3  | 100.0% | 1  |   |            |            |            |            |           |           |           |           |      |      |      |      |      |     |      |     |     |      |      |      |     |      |      |      |  |  |
|            |         |                                                                              |        | VLGANLPGKGGEMVNAALALEYTGSCEDAR | 6  | 100.0% | 1  |   |            |            |            |            |           |           |           |           |      |      |      |      |      |     |      |     |     |      |      |      |     |      |      |      |  |  |
|            |         |                                                                              |        | VEEGLPFLK                      | 2  | 99.9%  | 1  |   |            |            |            |            |           |           |           |           |      |      |      |      |      |     |      |     |     |      |      |      |     |      |      |      |  |  |
|            |         |                                                                              |        | DGSTITAGNSSVSDGAAAIL           |    |        |    |   |            |            |            |            |           |           |           |           |      |      |      |      |      |     |      |     |     |      |      |      |     |      |      |      |  |  |





|            |          |                                                                                |        |                   |   |        |    |   |            |             |            |            |           |           |           |         |         |      |      |      |      |     |      |     |     |       |      |      |      |       |       |      |     |     |  |
|------------|----------|--------------------------------------------------------------------------------|--------|-------------------|---|--------|----|---|------------|-------------|------------|------------|-----------|-----------|-----------|---------|---------|------|------|------|------|-----|------|-----|-----|-------|------|------|------|-------|-------|------|-----|-----|--|
| P00045851  | RPN1     | 13 kDa protein                                                                 | 100.0% | LMFNDFSSSDTSTLSYK | 2 | 100.0% | 1  | 1 | 1          | 2,666,650   | 2,687,060  | 2,792,465  | 3,231,445 | 273,863   | 237,361   | 466,504 | 186,976 | 23.0 | 19.8 | 37.4 | 12.9 | 1.0 | 1    | 1.0 | 0.8 | 1.2   | 0.1  | 1.0  | 0.8  | 1.2   | 0.1   | 1.2  | 0.4 |     |  |
| P00045854  | MILT2    | 26 kDa protein                                                                 | 98.6%  | ATSFLLALEPELEAR   | 2 | 100.0% | 1  | 1 | 1          | 3,024,520   | 3,333,560  | 3,091,920  | 3,436,930 | 214,047   | 161,723   | 171,234 | 121,410 | 15.8 | 10.9 | 12.4 | 7.9  | 1.1 | 0.3  | 1.0 | 0.8 | 1.1   | 0.1  | -1.1 | 0.3  | 1.0   | 0.6   | 1.1  | 0.1 |     |  |
| P00046071  | LUG2     | Uncharacterized protein                                                        | 100.0% | CFAPVHDK          | 2 | 99.9%  | 1  | 1 | 1          |             |            |            |           |           |           |         |         |      |      |      |      |     |      |     |     |       |      |      |      |       |       |      |     |     |  |
| P00046068  | UGF2     | Uncharacterized protein                                                        | 100.0% |                   | 1 | 1      | 1  | 2 | 6,047,822  | 5,891,511   | 5,679,411  | 6,811,133  | 545,672   | 393,708   | 460,635   | 215,332 | 20.2    | 14.9 | 18.1 | 7.0  | -1.0 | 0.8 | -1.1 | 0.6 | 1.1 | 0.2   | -1.0 | 0.7  | 1.2  | 0.6   | 1.2   | 0.05 |     |     |  |
| P00046028  | KLC4     | Uncharacterized protein                                                        | 100.0% |                   | 1 | 1      | 1  | 2 | 6,047,822  | 5,891,511   | 5,679,411  | 6,811,133  | 545,672   | 393,708   | 460,635   | 215,332 | 20.2    | 14.9 | 18.1 | 7.0  | -1.0 | 0.8 | -1.1 | 0.6 | 1.1 | 0.2   | -1.0 | 0.7  | 1.2  | 0.6   | 1.2   | 0.05 |     |     |  |
| P00046028  | KLC4     | Uncharacterized protein                                                        | 100.0% |                   | 3 | 99.7%  | 1  | 1 | 1,728,703  | 1,680,111   | 1,692,658  | 1,972,667  | 172,067   | 89,585    | 115,854   | 97,967  | 22.3    | 11.9 | 15.3 | 11.1 | -1.0 | 0.8 | -1.0 | 0.9 | 1.1 | 0.3   | 1.0  | 0.9  | 1.2  | 0.6   | 1.2   | 0.1  |     |     |  |
| P00046083  | PLS1     | Uncharacterized protein                                                        | 100.0% |                   | 2 | 100.0% | 1  | 1 |            |             |            |            |           |           |           |         |         |      |      |      |      |     |      |     |     |       |      |      |      |       |       |      |     |     |  |
| P00047477  | PLS1     | Uncharacterized protein                                                        | 100.0% |                   | 1 | 1      | 2  | 2 | 419,706    | 372,805     | 476,359    | 484,473    | 19,888    | 39,234    | 33,486    | 35,211  | 10.6    | 23.5 | 15.7 | 16.3 | -1.1 | 0.3 | 1.1  | 0.2 | 1.2 | 0.1   | 1.3  | 0.6  | 1.3  | 0.07  | 1.0   | 0.9  |     |     |  |
| P00046092  | CALU     | calumenin isoform 1                                                            | 100.0% |                   | 3 | 100.0% | 2  | 2 |            |             |            |            |           |           |           |         |         |      |      |      |      |     |      |     |     |       |      |      |      |       |       |      |     |     |  |
| P00046103  | NDUF5A   | Uncharacterized protein                                                        | 98.5%  |                   | 1 | 1      | 1  | 2 | 129,308    | 114,714     | 130,771    | 140,667    | 16,229    | 11,648    | 20,238    | 12,950  | 28.1    | 22.7 | 34.6 | 20.6 | -1.1 | 0.5 | 1.0  | 1.1 | 0.6 | 1.1   | 0.5  | 1.2  | 0.2  | 1.1   | 0.7   | 1.1  | 0.7 |     |  |
| P00046474  | NDUF5A   | 8 kDa protein                                                                  | 98.5%  |                   | 1 | 1      | 1  | 2 | 129,308    | 114,714     | 130,771    | 140,667    | 16,229    | 11,648    | 20,238    | 12,950  | 28.1    | 22.7 | 34.6 | 20.6 | -1.1 | 0.5 | 1.0  | 1.1 | 0.6 | 1.1   | 0.5  | 1.2  | 0.2  | 1.1   | 0.7   | 1.1  | 0.7 |     |  |
| P00046316  | KPNA4    | 19 kDa protein                                                                 | 100.0% |                   | 2 | 95.5%  | 1  | 1 |            |             |            |            |           |           |           |         |         |      |      |      |      |     |      |     |     |       |      |      |      |       |       |      |     |     |  |
| P00046351  | AP1B1    | Uncharacterized protein                                                        | 100.0% |                   | 6 | 6      | 8  | 1 | 2,691,871  | 3,046,438   | 2,716,847  | 3,133,329  | 265,748   | 187,995   | 239,852   | 105,353 | 22.1    | 11.6 | 19.7 | 7.5  | 1.1  | 0.3 | 1.0  | 0.9 | 1.2 | 0.2   | -1.1 | 0.3  | 1.0  | 0.7   | 1.2   | 0.2  |     |     |  |
| P00046377  | CDC58    | Uncharacterized protein                                                        | 99.6%  |                   | 2 | 99.1%  | 1  | 1 |            |             |            |            |           |           |           |         |         |      |      |      |      |     |      |     |     |       |      |      |      |       |       |      |     |     |  |
| P00046478  | ATP13A1  | Uncharacterized protein                                                        | 100.0% |                   | 1 | 1      | 2  | 1 | 2,243,560  | 2,444,623   | 2,339,237  | 2,479,953  | 145,165   | 131,546   | 234,190   | 98,211  | 14.5    | 12.0 | 22.4 | 8.9  | 1.1  | 0.3 | 1.0  | 0.7 | 1.1 | 0.2   | -1.0 | 0.7  | 1.0  | 0.9   | 1.1   | 0.8  |     |     |  |
| P00046483  | PFN2     | Protein                                                                        | 100.0% |                   | 2 | 2      | 2  | 1 | 324,714    | 286,613     | 285,928    | 370,219    | 44,370    | 18,919    | 22,725    | 7,826   | 30.8    | 14.3 | 17.8 | 4.7  | -1.1 | 0.6 | -1.1 | 0.5 | 1.1 | 0.4   | -1.0 | 0.7  | 1.2  | 0.007 | 1.3   | 0.02 |     |     |  |
| P00046493  | TRIM9    | Uncharacterized protein                                                        | 91.4%  |                   | 1 | 1      | 1  | 1 | 3,545,530  | 2,923,210   | 3,634,990  | 3,588,610  | 173,967   | 264,349   | 436,770   | 396,764 | 11.0    | 20.2 | 26.8 | 24.7 | -1.2 | 0.6 | 1.0  | 0.9 | 1.0 | 0.9   | 1.2  | 0.2  | 1.2  | 0.2   | -1.0  | 0.9  |     |     |  |
| P00046712  | FAM16A   | Uncharacterized protein                                                        | 95.4%  |                   | 1 | 1      | 1  | 1 | 4,536,428  | 4,458,259   | 5,517,370  | 5,472,420  | 1,473,246 | 1,698,307 | 756,457   | 978,314 | 72.8    | 69.6 | 30.7 | 40.0 | 1.2  | 0.7 | 1.2  | 0.6 | 1.2 | 0.6   | 1.0  | 1    | 1.0  | 1     | -1.0  | 1    |     |     |  |
| P00046911  | RAB7A    | Uncharacterized protein                                                        | 100.0% |                   | 2 | 95.4%  | 1  | 1 |            |             |            |            |           |           |           |         |         |      |      |      |      |     |      |     |     |       |      |      |      |       |       |      |     |     |  |
| P00046928  | ARF4     | Uncharacterized protein                                                        | 94.7%  |                   | 1 | 1      | 1  | 1 | 1,829,050  | 1,886,400   | 1,867,180  | 2,114,200  | 208,417   | 104,841   | 138,839   | 105,474 | 25.5    | 12.4 | 16.6 | 11.2 | 1.0  | 0.8 | 1.0  | 0.9 | 1.2 | 0.3   | -1.0 | 0.9  | 1.1  | 0.2   | 1.1   | 0.2  |     |     |  |
| P00047129  | PDHB     | Uncharacterized protein                                                        | 100.0% |                   | 3 | 3      | 3  | 1 | 4,692,954  | 5,611,299   | 4,421,669  | 6,994,998  | 934,438   | 540,565   | 691,860   | 500,366 | 44.5    | 21.5 | 35.0 | 18.2 | 1.2  | 0.4 | -1.1 | 0.8 | 1.5 | 0.07  | -1.3 | 0.2  | 1.2  | 0.1   | 1.6   | 0.02 |     |     |  |
| P00047227  | PLS3     | beta3n-3 isoform 2                                                             | 100.0% |                   | 2 | 99.5%  | 1  | 1 |            |             |            |            |           |           |           |         |         |      |      |      |      |     |      |     |     |       |      |      |      |       |       |      |     |     |  |
| P00047318  | PDHB     | 28 kDa protein                                                                 | 96.9%  |                   | 1 | 1      | 1  | 1 | 542,856    | 578,316     | 582,184    | 621,018    | 49,944    | 58,398    | 38,196    | 44,104  | 20.6    | 22.6 | 14.7 | 15.9 | 1.1  | 0.7 | 1.1  | 0.5 | 1.1 | 0.3   | 1.0  | 1    | 1.1  | 0.6   | 1.1   | 0.5  |     |     |  |
| P00047393  | RBP7     | Uncharacterized protein                                                        | 100.0% |                   | 1 | 1      | 2  | 1 | 1,191,490  | 1,059,602   | 1,059,602  | 1,410,690  | 132,700   | 57,903    | 105,230   | 89,824  | 24.9    | 10.5 | 22.2 | 14.2 | 1.0  | 0.8 | -1.1 | 0.5 | 1.2 | 0.2   | -1.2 | 0.2  | 1.1  | 0.1   | 1.3   | 0.03 |     |     |  |
| P00047398  | PSM08    | Uncharacterized protein                                                        | 100.0% |                   | 2 | 100.0% | 2  | 1 | 1,526,525  | 1,659,508   | 1,524,419  | 1,769,728  | 144,710   | 77,454    | 138,047   | 55,297  | 21.2    | 10.4 | 20.3 | 7.0  | 1.1  | 0.4 | -1.0 | 1   | 1.2 | 0.2   | -1.1 | 0.4  | 1.1  | 0.3   | 1.2   | 0.1  |     |     |  |
| P00047447  | ACY1     | aminoacylase-1 isoform c                                                       | 100.0% |                   | 6 | 99.5%  | 2  | 1 | 11,291,896 | 11,870,023  | 11,573,525 | 12,572,528 | 1,198,014 | 751,598   | 906,378   | 413,119 | 23.7    | 14.2 | 17.5 | 7.4  | 1.1  | 0.7 | 1.0  | 0.9 | 1.1 | 0.4   | -1.0 | 0.8  | 1.1  | 0.4   | 1.1   | 0.3  |     |     |  |
| P00047454  | PLS3     | Protein                                                                        | 100.0% |                   | 2 | 2      | 3  | 1 | 1,239,912  | 1,102,898   | 1,185,961  | 1,318,393  | 145,339   | 56,681    | 56,639    | 96,448  | 26.2    | 11.5 | 10.7 | 16.4 | -1.1 | 0.4 | -1.0 | 0.7 | 1.1 | 0.7   | 1.1  | 0.3  | 1.2  | 0.09  | 1.1   | 0.3  |     |     |  |
| P00047554  | MST4     | cDNA FLJ39689 fs. clone PLACE1005519, moderately similar to Homo sapiens ST    | 100.0% |                   | 2 | 2      | 2  | 1 | 7,578,669  | 8,089,230   | 8,462,837  | 9,046,133  | 339,895   | 580,737   | 372,602   | 283,247 | 10.0    | 16.1 | 9.8  | 6.5  | 1.1  | 0.5 | 1.1  | 0.1 | 1.2 | 0.009 | 1.0  | 0.6  | 1.1  | 0.2   | 1.1   | 0.2  | 1.1 | 0.2 |  |
| P00052871  | CC17     | T-complex protein 1 subunit eta isoform c                                      | 100.0% |                   | 9 | 9      | 10 | 2 | 14,172,367 | 14,022,306  | 13,956,969 | 15,812,332 | 1,144,915 | 641,133   | 1,045,390 | 797,005 | 18.1    | 10.2 | 17.2 | 10.7 | -1.0 | 0.9 | -1.0 | 0.7 | 1.1 | 0.3   | -1.0 | 0.7  | 1.1  | 0.1   | 1.2   | 0.1  | 1.2 | 0.1 |  |
| P001015938 | CC17     | cDNA FLJ34568, highly similar to T-complex protein 1 subunit eta               | 100.0% |                   | 2 | 99.3%  | 1  | 1 | 14,172,367 | 14,022,306  | 13,956,969 | 15,812,332 | 1,144,915 | 641,133   | 1,045,390 | 797,005 | 18.1    | 10.2 | 17.2 | 10.7 | -1.0 | 0.9 | -1.0 | 0.7 | 1.1 | 0.3   | -1.0 | 0.7  | 1.1  | 0.1   | 1.2   | 0.1  | 1.2 | 0.1 |  |
| P00052872  | TFG      | Uncharacterized protein                                                        | 100.0% |                   | 2 | 100.0% | 1  | 1 | 1,139,384  | 1,073,360   | 1,124,036  | 1,148,572  | 95,170    | 58,768    | 94,486    | 51,739  | 18.7    | 11.8 | 18.8 | 10.1 | -1.1 | 0.6 | -1.0 | 0.9 | 1.0 | 0.9   | 1.0  | 0.7  | 1.1  | 0.4   | 1.0   | 0.8  |     |     |  |
| P00053321  | STAM     | Uncharacterized protein                                                        | 100.0% |                   | 2 | 99.9%  | 2  | 1 | 1,018,800  | 1,135,617   | 1,189,000  | 1,132,327  | 47,313    | 97,108    | 57,370    | 38,769  | 10.4    | 15.1 | 10.8 | 7.3  | 1.1  | 0.3 | 1.2  | 0.5 | 1.1 | 0.5   | 1.0  | 0.6  | -1.0 | 1     | -1.1  | 0.4  |     |     |  |
| P00053538  | CDHRS    | Uncharacterized protein                                                        | 99.4%  |                   | 1 | 1      | 1  | 1 | 3,802,950  | 4,210,850   | 4,068,375  | 4,590,375  | 238,748   | 279,985   | 403,629   | 220,916 | 14.0    | 14.9 | 22.2 | 10.8 | 1.1  | 0.3 | 1.1  | 0.2 | 1.2 | 0.4   | -1.0 | 0.8  | 1.1  | 0.3   | 1.1   | 0.3  | 1.1 | 0.3 |  |
| P00053668  | IGF2BP3  | 9 kDa protein                                                                  | 100.0% |                   | 2 | 2      | 3  | 1 | 4,778,875  | 4,822,575   | 4,261,045  | 5,144,155  | 263,778   | 301,363   | 162,086   | 194,608 | 12.3    | 16.8 | 8.5  | 8.5  | 1.0  | 0.9 | -1.1 | 0.1 | 0.3 | -1.1  | 0.2  | 1.1  | 0.5  | 1.2   | 0.008 |      |     |     |  |
| P00053698  | GSR      | glutathione reductase, mitochondrial isoform 4 precursor                       | 100.0% |                   | 6 | 6      | 7  | 2 | 9,515,285  | 9,496,659   | 9,276,141  | 10,865,942 | 479,314   | 385,605   | 422,360   | 346,639 | 11.3    | 9.1  | 10.2 | 7.1  | -1.0 | 1   | -1.0 | 0.7 | 1.1 | 0.05  | -1.0 | 0.7  | 1.1  | 0.03  | 1.2   | 0.02 |     |     |  |
| P000716634 | GSR      | glutathione reductase, mitochondrial isoform 3 precursor                       | 100.0% |                   | 6 | 6      | 7  | 2 | 9,515,285  | 9,496,659   | 9,276,141  | 10,865,942 | 479,314   | 385,605   | 422,360   | 346,639 | 11.3    | 9.1  | 10.2 | 7.1  | -1.0 | 1   | -1.0 | 0.7 | 1.1 | 0.05  | -1.0 | 0.7  | 1.1  | 0.03  | 1.2   | 0.02 |     |     |  |
| P00054189  | SELENBP1 | isoform 2 of Selenium-binding protein 1                                        | 100.0% |                   | 4 | 88.7%  | 5  | 1 | 6,134,998  | 6,605,684   | 6,242,740  | 7,446,531  | 521,277   | 225,568   | 521,328   | 385,660 | 19.0    | 7.6  | 18.7 | 11.6 | 1.1  | 0.4 | 1.0  | 0.9 | 1.2 | 0.08  | -1.1 | 0.5  | 1.1  | 0.1   | 1.2   | 0.1  | 1.2 | 0.1 |  |
| P00054844  | FCAMR    | high affinity immunoglobulin alpha and immunoglobulin mu Fc receptor isoform b | 98.8%  |                   | 2 | 95.0%  | 1  | 1 | 2,511,680  | 3,271,870</ |            |            |           |           |           |         |         |      |      |      |      |     |      |     |     |       |      |      |      |       |       |      |     |     |  |





|           |                |                                                                              |        |                         |   |        |    |   |           |           |           |            |           |         |         |         |      |      |      |      |      |     |      |     |      |      |      |     |      |      |      |      |      |     |  |
|-----------|----------------|------------------------------------------------------------------------------|--------|-------------------------|---|--------|----|---|-----------|-----------|-----------|------------|-----------|---------|---------|---------|------|------|------|------|------|-----|------|-----|------|------|------|-----|------|------|------|------|------|-----|--|
| P00966084 | COP54          | Uncharacterized protein                                                      | 100.0% | 215                     | 4 | 5      | 5  | 1 | 4,708,702 | 5,193,948 | 5,401,537 | 5,873,219  | 410,414   | 366,320 | 375,630 | 189,690 | 19.5 | 15.8 | 15.6 | 7.2  | 1.1  | 0.4 | 1.1  | 0.2 | 1.2  | 0.03 | 1.0  | 0.7 | 1.1  | 0.1  | 1.1  | 0.3  |      |     |  |
|           |                |                                                                              |        | ATTADGSSLR              | 2 | 98.6%  | 1  |   |           |           |           |            |           |         |         |         |      |      |      |      |      |     |      |     |      |      |      |     |      |      |      |      |      |     |  |
|           |                |                                                                              |        | IASQMTTEGR              | 2 | 99.0%  | 1  |   |           |           |           |            |           |         |         |         |      |      |      |      |      |     |      |     |      |      |      |     |      |      |      |      |      |     |  |
|           |                |                                                                              |        | LYNNTFFELGALLEPAAK      | 2 | 100.0% | 1  |   |           |           |           |            |           |         |         |         |      |      |      |      |      |     |      |     |      |      |      |     |      |      |      |      |      |     |  |
|           |                |                                                                              |        | LYNNTFFELGALLEPAAK      | 3 | 99.3%  | 1  |   |           |           |           |            |           |         |         |         |      |      |      |      |      |     |      |     |      |      |      |     |      |      |      |      |      |     |  |
| P00966701 | ISOC1          | Uncharacterized protein                                                      | 100.0% | MNGFDGQGVHFETR          | 3 | 99.9%  | 1  |   |           |           |           |            |           |         |         |         |      |      |      |      |      |     |      |     |      |      |      |     |      |      |      |      |      |     |  |
| P00966778 | ISOC1          | Uncharacterized protein                                                      | 100.0% | 5.9                     | 1 | 1      | 1  | 2 | 904,474   | 806,734   | 753,270   | 796,620    | 141,661   | 26,570  | 68,149  | 41,470  | 35.0 | 7.4  | 20.2 | 11.6 | -1.1 | 0.5 | -1.2 | 0.4 | -1.1 | 0.5  | -1.1 | 0.5 | -1.0 | 0.8  | 1.1  | 0.6  |      |     |  |
|           |                |                                                                              |        | 5.9                     | 1 | 1      | 1  | 2 | 904,474   | 806,734   | 753,270   | 796,620    | 141,661   | 26,570  | 68,149  | 41,470  | 35.0 | 7.4  | 20.2 | 11.6 | -1.1 | 0.5 | -1.2 | 0.4 | -1.1 | 0.5  | -1.1 | 0.5 | -1.0 | 0.8  | 1.1  | 0.6  |      |     |  |
| P00966111 | GNB2L1         | Uncharacterized protein                                                      | 100.0% | YFDGSDVGR               | 2 | 99.9%  | 1  |   |           |           |           |            |           |         |         |         |      |      |      |      |      |     |      |     |      |      |      |     |      |      |      |      |      |     |  |
|           |                |                                                                              |        | 21.9                    | 4 | 5      | 6  | 1 | 4,705,385 | 5,020,555 | 4,868,282 | 5,562,288  | 484,269   | 194,464 | 374,355 | 141,082 | 23.0 | 8.7  | 17.2 | 5.7  | 1.1  | 0.8 | 1.0  | 0.8 | 1.2  | 0.2  | -1.0 | 0.7 | 1.1  | 0.5  | 1.1  | 0.1  | 0.1  |     |  |
|           |                |                                                                              |        | DQGMWLWNEGR             | 2 | 100.0% | 2  |   |           |           |           |            |           |         |         |         |      |      |      |      |      |     |      |     |      |      |      |     |      |      |      |      |      |     |  |
|           |                |                                                                              |        | FSPNSNPVSCGDWK          | 2 | 100.0% | 1  |   |           |           |           |            |           |         |         |         |      |      |      |      |      |     |      |     |      |      |      |     |      |      |      |      |      |     |  |
|           |                |                                                                              |        | GHNGWYQTATPPQPMILSASR   | 3 | 100.0% | 1  |   |           |           |           |            |           |         |         |         |      |      |      |      |      |     |      |     |      |      |      |     |      |      |      |      |      |     |  |
|           |                |                                                                              |        | IVDELKQEVITSSK          | 2 | 100.0% | 1  |   |           |           |           |            |           |         |         |         |      |      |      |      |      |     |      |     |      |      |      |     |      |      |      |      |      |     |  |
|           |                |                                                                              |        | IVDELKQEVITSSK          | 3 | 99.2%  | 1  |   |           |           |           |            |           |         |         |         |      |      |      |      |      |     |      |     |      |      |      |     |      |      |      |      |      |     |  |
| P00966134 | HINT1          | Uncharacterized protein                                                      | 100.0% | 32.3                    | 2 | 2      | 2  | 4 | 1,698,058 | 1,671,678 | 1,486,984 | 1,752,332  | 115,196   | 158,780 | 174,730 | 153,379 | 15.2 | 21.2 | 26.3 | 19.6 | -1.0 | 0.9 | -1.1 | 0.3 | 1.0  | 0.8  | -1.1 | 0.5 | 1.0  | 0.7  | 1.2  | 0.3  |      |     |  |
| P00967473 | HINT1          | Uncharacterized protein                                                      | 100.0% | 20.4                    | 2 | 2      | 2  | 4 | 1,698,058 | 1,671,678 | 1,486,984 | 1,752,332  | 115,196   | 158,780 | 174,730 | 153,379 | 15.2 | 21.2 | 26.3 | 19.6 | -1.0 | 0.9 | -1.1 | 0.3 | 1.0  | 0.8  | -1.1 | 0.5 | 1.0  | 0.7  | 1.2  | 0.3  |      |     |  |
| P00967744 | HINT1          | Uncharacterized protein                                                      | 100.0% | 26.9                    | 2 | 2      | 2  | 4 | 1,698,058 | 1,671,678 | 1,486,984 | 1,752,332  | 115,196   | 158,780 | 174,730 | 153,379 | 15.2 | 21.2 | 26.3 | 19.6 | -1.0 | 0.9 | -1.1 | 0.3 | 1.0  | 0.8  | -1.1 | 0.5 | 1.0  | 0.7  | 1.2  | 0.3  |      |     |  |
| P00965824 | HINT1          | Uncharacterized protein                                                      | 100.0% | 26.9                    | 2 | 2      | 2  | 4 | 1,698,058 | 1,671,678 | 1,486,984 | 1,752,332  | 115,196   | 158,780 | 174,730 | 153,379 | 15.2 | 21.2 | 26.3 | 19.6 | -1.0 | 0.9 | -1.1 | 0.3 | 1.0  | 0.8  | -1.1 | 0.5 | 1.0  | 0.7  | 1.2  | 0.3  |      |     |  |
|           |                |                                                                              |        | AQVARRPQDFTGK           | 2 | 100.0% | 1  |   |           |           |           |            |           |         |         |         |      |      |      |      |      |     |      |     |      |      |      |     |      |      |      |      |      |     |  |
|           |                |                                                                              |        | IFEDQK                  | 2 | 97.2%  | 1  |   |           |           |           |            |           |         |         |         |      |      |      |      |      |     |      |     |      |      |      |     |      |      |      |      |      |     |  |
| P00966204 | PDCD6          | Protein                                                                      | 100.0% | 28.9                    | 3 | 3      | 4  | 1 | 5,811,480 | 5,857,610 | 5,547,320 | 6,291,707  | 419,425   | 282,409 | 419,209 | 387,066 | 16.1 | 10.8 | 16.9 | 13.8 | 1.0  | 0.9 | -1.0 | 0.7 | 1.1  | 0.4  | -1.1 | 0.6 | 1.1  | 0.4  | 1.1  | 0.2  |      |     |  |
|           |                |                                                                              |        | AGVNFSEFTGVWK           | 2 | 100.0% | 2  |   |           |           |           |            |           |         |         |         |      |      |      |      |      |     |      |     |      |      |      |     |      |      |      |      |      |     |  |
|           |                |                                                                              |        | LYRQNSGASLNLEK          | 3 | 99.9%  | 1  |   |           |           |           |            |           |         |         |         |      |      |      |      |      |     |      |     |      |      |      |     |      |      |      |      |      |     |  |
|           |                |                                                                              |        | YTDWQNVFR               | 2 | 99.5%  | 1  |   |           |           |           |            |           |         |         |         |      |      |      |      |      |     |      |     |      |      |      |     |      |      |      |      |      |     |  |
| P00966234 | PAIP1          | Uncharacterized protein                                                      | 96.0%  | 4.5                     | 1 | 1      | 1  | 1 | 1,536,040 | 1,625,533 | 1,646,222 | 1,599,707  | 159,463   | 115,179 | 131,203 | 57,952  | 23.2 | 18.8 | 17.8 | 8.1  | 1.1  | 0.7 | 1.1  | 0.6 | 1.0  | 0.7  | 1.0  | 0.9 | -1.0 | 0.8  | -1.0 | 0.8  | -1.0 | 0.8 |  |
| P00966482 | COP54          | cDNA FLJ35919 fs, clone BRACE2003987, highly similar to COP5 signalosome cor | 100.0% | 16.5                    | 4 | 4      | 4  | 1 | 8,925,360 | 9,666,665 | 9,446,335 | 11,204,341 | 1,082,599 | 643,203 | 708,245 | 389,581 | 27.1 | 14.9 | 16.8 | 7.8  | 1.1  | 0.8 | 1.1  | 0.7 | 1.3  | 0.1  | -1.0 | 0.8 | 1.2  | 0.08 | 1.2  | 0.06 |      |     |  |
|           |                |                                                                              |        | AIQLSGAQLEALK           | 2 | 99.9%  | 1  |   |           |           |           |            |           |         |         |         |      |      |      |      |      |     |      |     |      |      |      |     |      |      |      |      |      |     |  |
|           |                |                                                                              |        | ATADGSSLR               | 2 | 98.6%  | 1  |   |           |           |           |            |           |         |         |         |      |      |      |      |      |     |      |     |      |      |      |     |      |      |      |      |      |     |  |
|           |                |                                                                              |        | LYNNTFFELGALLEPAAK      | 2 | 100.0% | 1  |   |           |           |           |            |           |         |         |         |      |      |      |      |      |     |      |     |      |      |      |     |      |      |      |      |      |     |  |
|           |                |                                                                              |        | VISFEQVASIR             | 2 | 98.2%  | 1  |   |           |           |           |            |           |         |         |         |      |      |      |      |      |     |      |     |      |      |      |     |      |      |      |      |      |     |  |
| P00966518 | RPS3A-SNORD73A | Uncharacterized protein                                                      | 100.0% | 21.1                    | 3 | 3      | 3  | 2 | 3,253,305 | 3,584,515 | 3,390,002 | 3,891,371  | 136,106   | 167,364 | 206,387 | 253,450 | 9.3  | 10.4 | 13.6 | 14.6 | 1.1  | 0.2 | 1.0  | 0.6 | 1.2  | 0.06 | -1.1 | 0.5 | 1.1  | 0.4  | 1.1  | 0.1  | 0.2  |     |  |
| P0096184  | RPS3A-SNORD73A | 24 kDa protein                                                               | 100.0% | 16.4                    | 3 | 3      | 3  | 2 | 3,253,305 | 3,584,515 | 3,390,002 | 3,891,371  | 136,106   | 167,364 | 206,387 | 253,450 | 9.3  | 10.4 | 13.6 | 14.6 | 1.1  | 0.2 | 1.0  | 0.6 | 1.2  | 0.06 | -1.1 | 0.5 | 1.1  | 0.4  | 1.1  | 0.1  | 0.2  |     |  |
|           |                |                                                                              |        | ACQSVPRHDFVFR           | 2 | 99.9%  | 1  |   |           |           |           |            |           |         |         |         |      |      |      |      |      |     |      |     |      |      |      |     |      |      |      |      |      |     |  |
|           |                |                                                                              |        | LMELVDESSSK             | 2 | 98.4%  | 1  |   |           |           |           |            |           |         |         |         |      |      |      |      |      |     |      |     |      |      |      |     |      |      |      |      |      |     |  |
|           |                |                                                                              |        | MMEIMTR                 | 2 | 88.7%  | 1  |   |           |           |           |            |           |         |         |         |      |      |      |      |      |     |      |     |      |      |      |     |      |      |      |      |      |     |  |
| P00966528 | HSD17B4        | Uncharacterized protein                                                      | 100.0% | 21.1                    | 1 | 1      | 1  | 1 | 340,628   | 368,637   | 367,376   | 397,081    | 54,948    | 46,871  | 30,342  | 30,530  | 36.1 | 28.3 | 18.5 | 17.2 | 1.1  | 0.7 | 1.1  | 0.7 | 1.2  | 0.4  | -1.0 | 1   | 1.1  | 0.6  | 1.1  | 0.5  |      |     |  |
|           |                |                                                                              |        | YLQDQNDVSR              | 2 | 100.0% | 1  |   |           |           |           |            |           |         |         |         |      |      |      |      |      |     |      |     |      |      |      |     |      |      |      |      |      |     |  |
| P00966644 | SEC31A         | Protein                                                                      | 99.9%  | 5.0                     | 1 | 1      | 1  | 2 | 454,661   | 514,058   | 460,172   | 476,087    | 52,692    | 24,522  | 38,127  | 20,657  | 25.9 | 10.7 | 18.5 | 9.7  | 1.1  | 0.3 | 1.0  | 0.9 | 1.0  | 0.7  | -1.1 | 0.3 | -1.1 | 0.3  | 1.0  | 0.7  |      |     |  |
| P00966688 | SEC31A         | Protein                                                                      | 99.9%  | 21.1                    | 1 | 1      | 1  | 2 | 454,661   | 514,058   | 460,172   | 476,087    | 52,692    | 24,522  | 38,127  | 20,657  | 25.9 | 10.7 | 18.5 | 9.7  | 1.1  | 0.3 | 1.0  | 0.9 | 1.0  | 0.7  | -1.1 | 0.3 | -1.1 | 0.3  | 1.0  | 0.7  |      |     |  |
|           |                |                                                                              |        | TTFEEDR                 | 2 | 98.3%  | 1  |   |           |           |           |            |           |         |         |         |      |      |      |      |      |     |      |     |      |      |      |     |      |      |      |      |      |     |  |
| P00966657 | SNHG4-MATR3    | Uncharacterized protein                                                      | 100.0% | 30.7                    | 9 | 9      | 13 | 1 | 6,949,708 | 6,781,074 | 7,011,246 | 7,629,885  | 458,523   | 220,338 | 540,297 | 374,003 | 14.8 | 7.3  | 17.2 | 11.0 | -1.0 | 0.7 | 1.0  | 0.9 | 1.1  | 0.3  | 1.0  | 0.7 | 1.1  | 0.09 | 1.1  | 0.4  |      |     |  |
|           |                |                                                                              |        | DLDELSPPEKDPENLPLLQLK   | 3 | 98.0%  | 1  |   |           |           |           |            |           |         |         |         |      |      |      |      |      |     |      |     |      |      |      |     |      |      |      |      |      |     |  |
|           |                |                                                                              |        | DLSSAGLELAAITQSSMPASLSR | 2 | 100.0% | 2  |   |           |           |           |            |           |         |         |         |      |      |      |      |      |     |      |     |      |      |      |     |      |      |      |      |      |     |  |
|           |                |                                                                              |        | GDADQSNLSLAFGLSAR       | 2 | 100.0% | 2  |   |           |           |           |            |           |         |         |         |      |      |      |      |      |     |      |     |      |      |      |     |      |      |      |      |      |     |  |
|           |                |                                                                              |        | GNLGGAGNLDGQR           | 2 | 99.9%  | 1  |   |           |           |           |            |           |         |         |         |      |      |      |      |      |     |      |     |      |      |      |     |      |      |      |      |      |     |  |
|           |                |                                                                              |        | TPRENLPOLLQK            | 2 | 100.0% | 2  |   |           |           |           |            |           |         |         |         |      |      |      |      |      |     |      |     |      |      |      |     |      |      |      |      |      |     |  |
|           |                |                                                                              |        | SFQDSSLR                | 2 | 100.0% | 1  |   |           |           |           |            |           |         |         |         |      |      |      |      |      |     |      |     |      |      |      |     |      |      |      |      |      |     |  |
|           |                |                                                                              |        | QAEKQVYGR               | 2 | 99.9%  | 1  |   |           |           |           |            |           |         |         |         |      |      |      |      |      |     |      |     |      |      |      |     |      |      |      |      |      |     |  |
|           |                |                                                                              |        | TEEGPLSYGR              | 2 | 99     |    |   |           |           |           |            |           |         |         |         |      |      |      |      |      |     |      |     |      |      |      |     |      |      |      |      |      |     |  |



|            |       |                                                                             |        |                              |    |        |    |   |             |             |             |             |           |           |           |           |      |      |      |      |      |     |      |     |      |     |      |     |     |      |      |      |  |  |  |  |
|------------|-------|-----------------------------------------------------------------------------|--------|------------------------------|----|--------|----|---|-------------|-------------|-------------|-------------|-----------|-----------|-----------|-----------|------|------|------|------|------|-----|------|-----|------|-----|------|-----|-----|------|------|------|--|--|--|--|
| P00069373  | HADHB | Hydroxacyl-Coenzyme A dehydrogenase/3-ketacyl-Coenzyme A thioester/enoyl-Co | 100.0% | 5.4                          | 2  | 2      | 2  | 1 | 2,948,783   | 2,699,773   | 2,943,909   | 2,891,913   | 189,029   | 169,214   | 183,689   | 91,588    | 14.3 | 14.0 | 14.0 | 7.1  | -1.1 | 0.4 | -1.0 | -1  | -1.0 | 0.8 | 1.1  | 0.4 | 1.1 | 0.3  | -1.0 | 0.8  |  |  |  |  |
|            |       |                                                                             |        | LEQDEVYLR                    | 2  | 99.1%  | 1  |   |             |             |             |             |           |           |           |           |      |      |      |      |      |     |      |     |      |     |      |     |     |      |      |      |  |  |  |  |
|            |       |                                                                             |        | TPKLLSGSTIK                  | 2  | 99.9%  | 1  |   |             |             |             |             |           |           |           |           |      |      |      |      |      |     |      |     |      |     |      |     |     |      |      |      |  |  |  |  |
| P00069616  | -     | Desmoplakin Ia                                                              | 100.0% | 20.1                         | 34 | 35     | 43 | 1 | 126,421,902 | 130,126,453 | 123,401,210 | 144,284,064 | 9,133,590 | 3,841,462 | 9,570,922 | 4,851,268 | 16.2 | 6.6  | 17.3 | 7.5  | 1.0  | 0.7 | -1.0 | 0.8 | 1.1  | 0.1 | -1.1 | 0.5 | 1.1 | 0.05 | 1.2  | 0.09 |  |  |  |  |
|            |       |                                                                             |        | ALLLVPELK                    | 2  | 99.9%  | 1  |   |             |             |             |             |           |           |           |           |      |      |      |      |      |     |      |     |      |     |      |     |     |      |      |      |  |  |  |  |
|            |       |                                                                             |        | ATGFGQVHK                    | 2  | 99.0%  | 1  |   |             |             |             |             |           |           |           |           |      |      |      |      |      |     |      |     |      |     |      |     |     |      |      |      |  |  |  |  |
|            |       |                                                                             |        | ATGDFDPSGK                   | 2  | 100.0% | 2  |   |             |             |             |             |           |           |           |           |      |      |      |      |      |     |      |     |      |     |      |     |     |      |      |      |  |  |  |  |
|            |       |                                                                             |        | ALLQALQTEMLK                 | 2  | 100.0% | 1  |   |             |             |             |             |           |           |           |           |      |      |      |      |      |     |      |     |      |     |      |     |     |      |      |      |  |  |  |  |
|            |       |                                                                             |        | FQDQVYR                      | 2  | 99.0%  | 1  |   |             |             |             |             |           |           |           |           |      |      |      |      |      |     |      |     |      |     |      |     |     |      |      |      |  |  |  |  |
|            |       |                                                                             |        | FLDNLQVYVAVCSQKAK            | 3  | 97.6%  | 1  |   |             |             |             |             |           |           |           |           |      |      |      |      |      |     |      |     |      |     |      |     |     |      |      |      |  |  |  |  |
|            |       |                                                                             |        | FLEFDVLTGGLVDPVHGR           | 3  | 100.0% | 2  |   |             |             |             |             |           |           |           |           |      |      |      |      |      |     |      |     |      |     |      |     |     |      |      |      |  |  |  |  |
|            |       |                                                                             |        | GGSGYTCGSSRDVEFK             | 2  | 100.0% | 1  |   |             |             |             |             |           |           |           |           |      |      |      |      |      |     |      |     |      |     |      |     |     |      |      |      |  |  |  |  |
|            |       |                                                                             |        | GVYSYTGQR                    | 2  | 100.0% | 1  |   |             |             |             |             |           |           |           |           |      |      |      |      |      |     |      |     |      |     |      |     |     |      |      |      |  |  |  |  |
|            |       |                                                                             |        | GLPSPYNNSSAPGSR              | 2  | 98.6%  | 1  |   |             |             |             |             |           |           |           |           |      |      |      |      |      |     |      |     |      |     |      |     |     |      |      |      |  |  |  |  |
|            |       |                                                                             |        | GYPNKEELSSVSDQTK             | 2  | 100.0% | 2  |   |             |             |             |             |           |           |           |           |      |      |      |      |      |     |      |     |      |     |      |     |     |      |      |      |  |  |  |  |
|            |       |                                                                             |        | IEVLEELR                     | 2  | 98.8%  | 1  |   |             |             |             |             |           |           |           |           |      |      |      |      |      |     |      |     |      |     |      |     |     |      |      |      |  |  |  |  |
|            |       |                                                                             |        | ISLVRPSTALELEAQAIGFVDPVSNLIR | 3  | 100.0% | 1  |   |             |             |             |             |           |           |           |           |      |      |      |      |      |     |      |     |      |     |      |     |     |      |      |      |  |  |  |  |
|            |       |                                                                             |        | KDFLQSSGAGINNETK             | 3  | 99.9%  | 1  |   |             |             |             |             |           |           |           |           |      |      |      |      |      |     |      |     |      |     |      |     |     |      |      |      |  |  |  |  |
|            |       |                                                                             |        | KDSQFDADK                    | 2  | 99.7%  | 1  |   |             |             |             |             |           |           |           |           |      |      |      |      |      |     |      |     |      |     |      |     |     |      |      |      |  |  |  |  |
|            |       |                                                                             |        | LSGYEAMK                     | 2  | 99.9%  | 1  |   |             |             |             |             |           |           |           |           |      |      |      |      |      |     |      |     |      |     |      |     |     |      |      |      |  |  |  |  |
|            |       |                                                                             |        | LISPESTYMLLEAQAIGTGGIDPKHR   | 3  | 95.9%  | 1  |   |             |             |             |             |           |           |           |           |      |      |      |      |      |     |      |     |      |     |      |     |     |      |      |      |  |  |  |  |
|            |       |                                                                             |        | LLEAQAISGVVDPVNSVFLPK        | 2  | 100.0% | 2  |   |             |             |             |             |           |           |           |           |      |      |      |      |      |     |      |     |      |     |      |     |     |      |      |      |  |  |  |  |
|            |       |                                                                             |        | LLEAQAISGVVDPVNSVFLPK        | 3  | 100.0% | 1  |   |             |             |             |             |           |           |           |           |      |      |      |      |      |     |      |     |      |     |      |     |     |      |      |      |  |  |  |  |
|            |       |                                                                             |        | LLEAQAISGVVDPVNSVFLPK        | 2  | 100.0% | 2  |   |             |             |             |             |           |           |           |           |      |      |      |      |      |     |      |     |      |     |      |     |     |      |      |      |  |  |  |  |
|            |       |                                                                             |        | LLOLQEGAR                    | 2  | 99.9%  | 1  |   |             |             |             |             |           |           |           |           |      |      |      |      |      |     |      |     |      |     |      |     |     |      |      |      |  |  |  |  |
|            |       |                                                                             |        | LNSLSLQATEQR                 | 2  | 100.0% | 1  |   |             |             |             |             |           |           |           |           |      |      |      |      |      |     |      |     |      |     |      |     |     |      |      |      |  |  |  |  |
|            |       |                                                                             |        | LSLDQANQSDVLDQMATR           | 2  | 100.0% | 1  |   |             |             |             |             |           |           |           |           |      |      |      |      |      |     |      |     |      |     |      |     |     |      |      |      |  |  |  |  |
|            |       |                                                                             |        | LTVDSAAIK                    | 2  | 99.9%  | 2  |   |             |             |             |             |           |           |           |           |      |      |      |      |      |     |      |     |      |     |      |     |     |      |      |      |  |  |  |  |
|            |       |                                                                             |        | QLONIGATSR                   | 2  | 100.0% | 1  |   |             |             |             |             |           |           |           |           |      |      |      |      |      |     |      |     |      |     |      |     |     |      |      |      |  |  |  |  |
|            |       |                                                                             |        | RQDLEENIK                    | 2  | 99.8%  | 2  |   |             |             |             |             |           |           |           |           |      |      |      |      |      |     |      |     |      |     |      |     |     |      |      |      |  |  |  |  |
|            |       |                                                                             |        | SAVIGLEEYENLK                | 2  | 100.0% | 1  |   |             |             |             |             |           |           |           |           |      |      |      |      |      |     |      |     |      |     |      |     |     |      |      |      |  |  |  |  |
|            |       |                                                                             |        | SGSSLSIQADMBSLK              | 2  | 100.0% | 2  |   |             |             |             |             |           |           |           |           |      |      |      |      |      |     |      |     |      |     |      |     |     |      |      |      |  |  |  |  |
|            |       |                                                                             |        | SNVVEGTGLR                   | 2  | 98.3%  | 1  |   |             |             |             |             |           |           |           |           |      |      |      |      |      |     |      |     |      |     |      |     |     |      |      |      |  |  |  |  |
|            |       |                                                                             |        | SRELDKCFAGANDQMEIQLDLIR      | 3  | 100.0% | 1  |   |             |             |             |             |           |           |           |           |      |      |      |      |      |     |      |     |      |     |      |     |     |      |      |      |  |  |  |  |
|            |       |                                                                             |        | TADLELVEYEFRR                | 2  | 99.9%  | 1  |   |             |             |             |             |           |           |           |           |      |      |      |      |      |     |      |     |      |     |      |     |     |      |      |      |  |  |  |  |
|            |       |                                                                             |        | TMDSQPCVLDQADVHAR            | 3  | 100.0% | 1  |   |             |             |             |             |           |           |           |           |      |      |      |      |      |     |      |     |      |     |      |     |     |      |      |      |  |  |  |  |
|            |       |                                                                             |        | TVSVSEAMK                    | 2  | 91.9%  | 1  |   |             |             |             |             |           |           |           |           |      |      |      |      |      |     |      |     |      |     |      |     |     |      |      |      |  |  |  |  |
|            |       |                                                                             |        | VLOEGEYTR                    | 2  | 99.9%  | 1  |   |             |             |             |             |           |           |           |           |      |      |      |      |      |     |      |     |      |     |      |     |     |      |      |      |  |  |  |  |
|            |       |                                                                             |        | YQDQGLYTR                    | 2  | 99.9%  | 1  |   |             |             |             |             |           |           |           |           |      |      |      |      |      |     |      |     |      |     |      |     |     |      |      |      |  |  |  |  |
| P00071062  | -     | HNF1 alpha B splice variant 6                                               | 99.4%  | 15.3                         | 1  | 1      | 1  | 3 | 47,728      | 42,718      | 44,821      | 49,576      | 7,512     | 5,069     | 2,862     | 4,827     | 35.2 | 26.5 | 14.3 | 21.8 | -1.1 | 0.8 | -1.1 | 0.7 | 1.0  | 0.8 | 1.0  | 0.7 | 1.2 | 0.4  | 1.1  | 0.4  |  |  |  |  |
| P00072907  | HNF1A | HNF1 alpha A splice variant 4                                               | 99.4%  | 16.0                         | 1  | 1      | 1  | 3 | 47,728      | 42,718      | 44,821      | 49,576      | 7,512     | 5,069     | 2,862     | 4,827     | 35.2 | 26.5 | 14.3 | 21.8 | -1.1 | 0.8 | -1.1 | 0.7 | 1.0  | 0.8 | 1.0  | 0.7 | 1.2 | 0.4  | 1.1  | 0.4  |  |  |  |  |
| P001012624 | HNF1A | 4 kb protein                                                                | 99.4%  | 46.3                         | 1  | 1      | 1  | 3 | 47,728      | 42,718      | 44,821      | 49,576      | 7,512     | 5,069     | 2,862     | 4,827     | 35.2 | 26.5 | 14.3 | 21.8 | -1.1 | 0.8 | -1.1 | 0.7 | 1.0  | 0.8 | 1.0  | 0.7 | 1.2 | 0.4  | 1.1  | 0.4  |  |  |  |  |
|            |       |                                                                             |        | LSQLOTELLAALESLSK            | 2  | 99.4%  | 1  |   |             |             |             |             |           |           |           |           |      |      |      |      |      |     |      |     |      |     |      |     |     |      |      |      |  |  |  |  |
| P00072989  | CAPG  | Uncharacterized protein                                                     | 100.0% | 11.5                         | 3  | 3      | 4  | 1 | 3,454,110   | 3,783,930   | 3,439,520   | 4,148,445   | 412,006   | 276,612   | 380,925   | 289,917   | 26.7 | 16.5 | 24.8 | 15.6 | 1.1  | 0.5 | -1.0 | -1  | 1.2  | 0.2 | -1.1 | 0.5 | 1.1 | 0.4  | 1.2  | 0.2  |  |  |  |  |
|            |       |                                                                             |        | DLALANR                      | 2  | 95.0%  | 1  |   |             |             |             |             |           |           |           |           |      |      |      |      |      |     |      |     |      |     |      |     |     |      |      |      |  |  |  |  |
|            |       |                                                                             |        | EGNPEEDLTADK                 | 2  | 99.9%  | 1  |   |             |             |             |             |           |           |           |           |      |      |      |      |      |     |      |     |      |     |      |     |     |      |      |      |  |  |  |  |
|            |       |                                                                             |        | EGNPEEDLTADKANQAALYK         | 3  | 99.9%  | 2  |   |             |             |             |             |           |           |           |           |      |      |      |      |      |     |      |     |      |     |      |     |     |      |      |      |  |  |  |  |
|            |       |                                                                             |        | AVLNNLGAVALR                 | 2  | 100.0% | 1  |   |             |             |             |             |           |           |           |           |      |      |      |      |      |     |      |     |      |     |      |     |     |      |      |      |  |  |  |  |
|            |       |                                                                             |        | IRLVYGEVLEKESAVYVWFVK        | 3  | 100.0% | 1  |   |             |             |             |             |           |           |           |           |      |      |      |      |      |     |      |     |      |     |      |     |     |      |      |      |  |  |  |  |
|            |       |                                                                             |        | RPDVYENPQKASASAVVASSNLAK     | 3  | 99.9%  | 1  |   |             |             |             |             |           |           |           |           |      |      |      |      |      |     |      |     |      |     |      |     |     |      |      |      |  |  |  |  |
| P00073566  | STK39 | Small intestine SPAK-like kinase                                            | 99.1%  | 2.9                          | 1  | 1      | 1  | 1 | 325,960     | 254,069     | 248,630     | 378,111     | 49,931    | 38,525    | 31,505    | 41,740    | 34.3 | 33.9 | 28.3 | 24.7 | -1.3 | 0.3 | -1.3 | 0.2 | 1.0  | 0.4 | -1.0 | 0.9 | 1.5 | 0.06 | 1.5  | 0.04 |  |  |  |  |
|            |       |                                                                             |        | NGVLEEAAITLK                 | 2  | 99.9%  | 1  |   |             |             |             |             |           |           |           |           |      |      |      |      |      |     |      |     |      |     |      |     |     |      |      |      |  |  |  |  |
| P00073773  | EIF3H | Uncharacterized protein                                                     | 99.6%  | 7.0                          | 1  | 2      | 2  | 2 | 483,633     | 486,625     | 525,663     | 503,093     | 45,933    | 61,555    | 56,309    | 33,696    | 21.2 | 29.5 | 24.0 | 15.0 | -1.0 | 0.8 | 1.1  | 0.6 | 1.0  | 0.7 | 1.1  | 0.5 | 1.1 | 0.6  | -1.0 | 0.7  |  |  |  |  |
| P001011324 | EIF3H | Uncharacterized protein                                                     | 99.6%  | 7.2                          | 1  | 1      | 2  | 2 | 483,633     | 486,625     | 525,663     | 503,093     | 45,933    | 61,555    | 56,309    | 33,696    | 21.2 | 29.5 | 24.0 | 15.0 | -1.0 | 0.8 | 1.1  | 0.6 | 1.0  | 0.7 | 1.1  | 0.5 | 1.1 | 0.6  | -1.0 | 0.7  |  |  |  |  |
|            |       |                                                                             |        | ANITFETWEEVPIVK              | 2  | 9      |    |   |             |             |             |             |           |           |           |           |      |      |      |      |      |     |      |     |      |     |      |     |     |      |      |      |  |  |  |  |





























|           |         |                                                                    |        |                           |    |        |    |   |             |             |             |             |           |           |           |           |      |      |      |      |      |     |      |     |     |      |      |     |      |      |     |     |     |  |  |  |
|-----------|---------|--------------------------------------------------------------------|--------|---------------------------|----|--------|----|---|-------------|-------------|-------------|-------------|-----------|-----------|-----------|-----------|------|------|------|------|------|-----|------|-----|-----|------|------|-----|------|------|-----|-----|-----|--|--|--|
| P0101537  | ACADVL  | 39 kDa protein                                                     | 100.0% | 37.6                      | 10 | 10     | 11 | 1 | 14,791,429  | 15,687,516  | 16,034,327  | 16,275,664  | 1,712,139 | 680,373   | 1,548,453 | 500,261   | 25.9 | 9.7  | 21.6 | 6.7  | 1.1  | 0.6 | 1.1  | 0.6 | 1.2 | 0.1  | 1.0  | 0.8 | 1.2  | 0.02 | 1.1 | 0.2 |     |  |  |  |
|           |         |                                                                    |        | AGLSSGSLSLVHPELSR         | 3  | 100.0% | 1  |   |             |             |             |             |           |           |           |           |      |      |      |      |      |     |      |     |     |      |      |     |      |      |     |     |     |  |  |  |
|           |         |                                                                    |        | ALEGATVVEAK               | 2  | 100.0% | 1  |   |             |             |             |             |           |           |           |           |      |      |      |      |      |     |      |     |     |      |      |     |      |      |     |     |     |  |  |  |
|           |         |                                                                    |        | ASNTAEVFFQVRE             | 2  | 100.0% | 1  |   |             |             |             |             |           |           |           |           |      |      |      |      |      |     |      |     |     |      |      |     |      |      |     |     |     |  |  |  |
|           |         |                                                                    |        | EGMAALQSPWQDELRYR         | 2  | 99.9%  | 1  |   |             |             |             |             |           |           |           |           |      |      |      |      |      |     |      |     |     |      |      |     |      |      |     |     |     |  |  |  |
|           |         |                                                                    |        | FGMAALAGLTKR              | 2  | 100.0% | 1  |   |             |             |             |             |           |           |           |           |      |      |      |      |      |     |      |     |     |      |      |     |      |      |     |     |     |  |  |  |
|           |         |                                                                    |        | GVNNEGLLKR                | 2  | 99.9%  | 1  |   |             |             |             |             |           |           |           |           |      |      |      |      |      |     |      |     |     |      |      |     |      |      |     |     |     |  |  |  |
|           |         |                                                                    |        | IFEGINDLR                 | 2  | 99.4%  | 1  |   |             |             |             |             |           |           |           |           |      |      |      |      |      |     |      |     |     |      |      |     |      |      |     |     |     |  |  |  |
|           |         |                                                                    |        | IHFGLDLEK                 | 2  | 99.9%  | 1  |   |             |             |             |             |           |           |           |           |      |      |      |      |      |     |      |     |     |      |      |     |      |      |     |     |     |  |  |  |
|           |         |                                                                    |        | NPFQNALGDEAK              | 2  | 99.9%  | 2  |   |             |             |             |             |           |           |           |           |      |      |      |      |      |     |      |     |     |      |      |     |      |      |     |     |     |  |  |  |
|           |         |                                                                    |        | VPSENVLGEVSSDFK           | 2  | 100.0% | 1  |   |             |             |             |             |           |           |           |           |      |      |      |      |      |     |      |     |     |      |      |     |      |      |     |     |     |  |  |  |
| P01015420 | ARF3    | 23 kDa protein                                                     | 100.0% | 25.2                      | 4  | 4      | 5  | 1 | 5,121,873   | 5,063,270   | 5,074,457   | 5,953,131   | 445,970   | 213,253   | 601,550   | 163,204   | 19.5 | 9.4  | 24.1 | 6.1  | -1.0 | 0.9 | 1.1  | 0.6 | 1.2 | 0.1  | 1.1  | 0.5 | 1.2  | 0.01 | 1.1 | 0.6 |     |  |  |  |
|           |         |                                                                    |        | LSEFTTFTRRNVEYVK          | 2  | 100.0% | 2  |   |             |             |             |             |           |           |           |           |      |      |      |      |      |     |      |     |     |      |      |     |      |      |     |     |     |  |  |  |
|           |         |                                                                    |        | MLAEELR                   | 2  | 88.1%  | 1  |   |             |             |             |             |           |           |           |           |      |      |      |      |      |     |      |     |     |      |      |     |      |      |     |     |     |  |  |  |
|           |         |                                                                    |        | MLAEELRDLVLLVFNK          | 3  | 99.9%  | 1  |   |             |             |             |             |           |           |           |           |      |      |      |      |      |     |      |     |     |      |      |     |      |      |     |     |     |  |  |  |
|           |         |                                                                    |        | NSFTFVYVSSDQK             | 2  | 100.0% | 1  |   |             |             |             |             |           |           |           |           |      |      |      |      |      |     |      |     |     |      |      |     |      |      |     |     |     |  |  |  |
| P01015421 | PSMC1   | cDNA FLJ58247, highly similar to 26S protease regulatory subunit 4 | 100.0% | 18.5                      | 4  | 5      | 6  | 1 | 8,319,952   | 8,435,578   | 8,366,845   | 9,459,542   | 615,069   | 492,382   | 609,619   | 439,085   | 16.5 | 13.1 | 13.6 | 10.4 | 1.0  | 0.9 | 1.0  | 1.1 | 1.1 | 0.2  | -1.0 | 0.9 | 1.1  | 0.2  | 1.1 | 0.1 | 6.1 |  |  |  |
|           |         |                                                                    |        | AVANDTSATFLR              | 2  | 100.0% | 1  |   |             |             |             |             |           |           |           |           |      |      |      |      |      |     |      |     |     |      |      |     |      |      |     |     |     |  |  |  |
|           |         |                                                                    |        | TMLKELNGLDQDFDR           | 2  | 100.0% | 2  |   |             |             |             |             |           |           |           |           |      |      |      |      |      |     |      |     |     |      |      |     |      |      |     |     |     |  |  |  |
|           |         |                                                                    |        | VAEHAPSVFDEDAIGTK         | 3  | 100.0% | 1  |   |             |             |             |             |           |           |           |           |      |      |      |      |      |     |      |     |     |      |      |     |      |      |     |     |     |  |  |  |
|           |         |                                                                    |        | WHAVGVLMDTDFLTVFMK        | 2  | 98.6%  | 1  |   |             |             |             |             |           |           |           |           |      |      |      |      |      |     |      |     |     |      |      |     |      |      |     |     |     |  |  |  |
|           |         |                                                                    |        | WHAVGVLMDTDFLTVFMK        | 3  | 100.0% | 1  |   |             |             |             |             |           |           |           |           |      |      |      |      |      |     |      |     |     |      |      |     |      |      |     |     |     |  |  |  |
| P01015433 | GLUD1   | Glutamate dehydrogenase                                            | 100.0% | 28.0                      | 5  | 5      | 5  | 1 | 3,572,130   | 3,754,108   | 3,592,551   | 4,094,773   | 314,160   | 114,702   | 252,255   | 132,645   | 19.7 | 6.8  | 15.7 | 7.3  | 1.1  | 0.8 | 1.0  | 1.1 | 1.1 | 0.2  | -1.0 | 0.6 | 1.1  | 0.1  | 1.1 | 0.1 | 6.1 |  |  |  |
|           |         |                                                                    |        | DSNYHLLMSVQESLER          | 2  | 95.3%  | 1  |   |             |             |             |             |           |           |           |           |      |      |      |      |      |     |      |     |     |      |      |     |      |      |     |     |     |  |  |  |
|           |         |                                                                    |        | HSDIIPVPTAEFQDR           | 2  | 100.0% | 1  |   |             |             |             |             |           |           |           |           |      |      |      |      |      |     |      |     |     |      |      |     |      |      |     |     |     |  |  |  |
|           |         |                                                                    |        | IAEGANGPTTPEADKFLER       | 3  | 100.0% | 1  |   |             |             |             |             |           |           |           |           |      |      |      |      |      |     |      |     |     |      |      |     |      |      |     |     |     |  |  |  |
|           |         |                                                                    |        | NLNHYSTGR                 | 2  | 99.9%  | 1  |   |             |             |             |             |           |           |           |           |      |      |      |      |      |     |      |     |     |      |      |     |      |      |     |     |     |  |  |  |
|           |         |                                                                    |        | TAAYVNAEK                 | 2  | 99.3%  | 1  |   |             |             |             |             |           |           |           |           |      |      |      |      |      |     |      |     |     |      |      |     |      |      |     |     |     |  |  |  |
| P01015454 | PPM1G   | PPM1G protein                                                      | 100.0% | 7.4                       | 3  | 3      | 3  | 1 | 24,142,277  | 24,632,883  | 23,428,463  | 28,459,507  | 1,772,528 | 1,693,306 | 1,566,675 | 2,179,947 | 16.4 | 15.4 | 15.0 | 17.1 | 1.0  | 0.8 | -1.0 | 0.8 | 1.2 | 0.2  | -1.1 | 0.6 | 1.2  | 0.2  | 1.2 | 0.1 | 6.1 |  |  |  |
|           |         |                                                                    |        | ALEDPLAIDAK               | 2  | 99.9%  | 1  |   |             |             |             |             |           |           |           |           |      |      |      |      |      |     |      |     |     |      |      |     |      |      |     |     |     |  |  |  |
|           |         |                                                                    |        | NLPPKQKRNLPDK             | 2  | 100.0% | 1  |   |             |             |             |             |           |           |           |           |      |      |      |      |      |     |      |     |     |      |      |     |      |      |     |     |     |  |  |  |
|           |         |                                                                    |        | QLUVANGDSR                | 2  | 99.7%  | 1  |   |             |             |             |             |           |           |           |           |      |      |      |      |      |     |      |     |     |      |      |     |      |      |     |     |     |  |  |  |
| P01015518 | STARD10 | Protein                                                            | 100.0% | 24.0                      | 2  | 2      | 3  | 1 | 1,170,521   | 1,605,511   | 1,343,748   | 2,010,684   | 236,193   | 152,326   | 170,374   | 212,561   | 44.9 | 21.2 | 28.4 | 23.6 | 1.4  | 0.2 | 1.1  | 0.6 | 1.7 | 0.03 | -1.2 | 0.3 | 1.3  | 0.2  | 1.5 | 0.4 | 0.4 |  |  |  |
|           |         |                                                                    |        | AVISQIYVLDSTGPK           | 2  | 100.0% | 2  |   |             |             |             |             |           |           |           |           |      |      |      |      |      |     |      |     |     |      |      |     |      |      |     |     |     |  |  |  |
|           |         |                                                                    |        | SCVITYLAQVDPK             | 2  | 99.5%  | 1  |   |             |             |             |             |           |           |           |           |      |      |      |      |      |     |      |     |     |      |      |     |      |      |     |     |     |  |  |  |
| P01015522 | ACTB    | cDNA FLJ55253, highly similar to Actin, cytoplasmic 1              | 100.0% | 49.5                      | 11 | 13     | 19 | 1 | 276,407,360 | 280,601,730 | 285,516,550 | 318,724,260 | #####     | #####     | #####     | #####     | 18.1 | 10.5 | 18.2 | 8.1  | 1.0  | 0.9 | -1.0 | 1.2 | 0.1 | -1.1 | 0.6  | 1.1 | 0.06 | 1.2  | 0.1 | 0.6 | 2.1 |  |  |  |
|           |         |                                                                    |        | AGSDQDPR                  | 1  | 99.0%  | 2  |   |             |             |             |             |           |           |           |           |      |      |      |      |      |     |      |     |     |      |      |     |      |      |     |     |     |  |  |  |
|           |         |                                                                    |        | CPKALFQPSFLGMSGSHETTFNSMK | 3  | 100.0% | 2  |   |             |             |             |             |           |           |           |           |      |      |      |      |      |     |      |     |     |      |      |     |      |      |     |     |     |  |  |  |
|           |         |                                                                    |        | DLVANTVLSGGTTHMYPGADR     | 2  | 100.0% | 1  |   |             |             |             |             |           |           |           |           |      |      |      |      |      |     |      |     |     |      |      |     |      |      |     |     |     |  |  |  |
|           |         |                                                                    |        | DLVANTVLSGGTTHMYPGADR     | 3  | 100.0% | 1  |   |             |             |             |             |           |           |           |           |      |      |      |      |      |     |      |     |     |      |      |     |      |      |     |     |     |  |  |  |
|           |         |                                                                    |        | ETALAPSTMK                | 1  | 100.0% | 1  |   |             |             |             |             |           |           |           |           |      |      |      |      |      |     |      |     |     |      |      |     |      |      |     |     |     |  |  |  |
|           |         |                                                                    |        | ETALAPSTMK                | 2  | 99.9%  | 2  |   |             |             |             |             |           |           |           |           |      |      |      |      |      |     |      |     |     |      |      |     |      |      |     |     |     |  |  |  |
|           |         |                                                                    |        | KDLVANVLSGGTTHMYPGADR     | 2  | 100.0% | 1  |   |             |             |             |             |           |           |           |           |      |      |      |      |      |     |      |     |     |      |      |     |      |      |     |     |     |  |  |  |
|           |         |                                                                    |        | LCYVALDFEGEMATASSSSLEK    | 2  | 100.0% | 2  |   |             |             |             |             |           |           |           |           |      |      |      |      |      |     |      |     |     |      |      |     |      |      |     |     |     |  |  |  |
|           |         |                                                                    |        | QEVYVSGPSVHNR             | 2  | 100.0% | 2  |   |             |             |             |             |           |           |           |           |      |      |      |      |      |     |      |     |     |      |      |     |      |      |     |     |     |  |  |  |
|           |         |                                                                    |        | QEVYVSGPSVHNR             | 2  | 100.0% | 2  |   |             |             |             |             |           |           |           |           |      |      |      |      |      |     |      |     |     |      |      |     |      |      |     |     |     |  |  |  |
|           |         |                                                                    |        | QEVYVSGPSVHNR             | 2  | 100.0% | 2  |   |             |             |             |             |           |           |           |           |      |      |      |      |      |     |      |     |     |      |      |     |      |      |     |     |     |  |  |  |
|           |         |                                                                    |        | QEVYVSGPSVHNR             | 3  | 100.0% | 1  |   |             |             |             |             |           |           |           |           |      |      |      |      |      |     |      |     |     |      |      |     |      |      |     |     |     |  |  |  |
|           |         |                                                                    |        | TTGVMSGSDVTHVPTREYALPHALR | 3  | 100.0% | 1  |   |             |             |             |             |           |           |           |           |      |      |      |      |      |     |      |     |     |      |      |     |      |      |     |     |     |  |  |  |
|           |         |                                                                    |        | VAPKDFPALLTEAKR           | 2  | 92.7%  | 2  |   |             |             |             |             |           |           |           |           |      |      |      |      |      |     |      |     |     |      |      |     |      |      |     |     |     |  |  |  |
| P01015569 | AP2B1   | Putative uncharacterized protein                                   | 100.0% | 11.1                      | 5  | 5      | 6  | 1 | 1,202,550   | 1,210,020   | 1,280,847   | 1,360,546   | 114,350   | 68,563    | 99,530    | 61,449    | 21.3 | 12.7 | 17.4 | 10.1 | 1.0  | 1.1 | 1.1  | 0.6 | 1.1 | 0.3  | 1.1  | 0.6 | 1.1  | 0.1  | 1.1 | 0.5 |     |  |  |  |
|           |         |                                                                    |        | AMWVHVEIKR                | 2  | 100.0% | 2  |   |             |             |             |             |           |           |           |           |      |      |      |      |      |     |      |     |     |      |      |     |      |      |     |     |     |  |  |  |
|           |         |                                                                    |        | CVSTLDDLOTK               | 2  | 100.0% | 1  |   |             |             |             |             |           |           |           |           |      |      |      |      |      |     |      |     |     |      |      |     |      |      |     |     |     |  |  |  |
|           |         |                                                                    |        | LASQANAGVLAELKEVATEVDVDFR | 3  | 100.0% | 1  |   |             |             |             |             |           |           |           |           |      |      |      |      |      |     |      |     |     |      |      |     |      |      |     |     |     |  |  |  |
|           |         |                                                                    |        |                           |    |        |    |   |             |             |             |             |           |           |           |           |      |      |      |      |      |     |      |     |     |      |      |     |      |      |     |     |     |  |  |  |
