# Supplementary material
Source: PubMed Central journal article supplement (PMC3789846)
Supplement: NIHMS487582-supplement-Table_2.pdf [file NIHMS487582-supplement-Table_2.pdf]

**SI Table 2. Proteins altered by 6 h 1 µg/mL Halloysite nanotube exposure.**

| Protein ID  | Gene Name | Protein Name                                                                    | Control       | 1ug/ml        | 10ug/ml       | 100ug/ml      | STDEV Control | STDEV 1ug/ml | STDEV 10ug/ml | STDEV 100ug/ml | Fold Change 1ug/ml vs Control | P value 1ug/ml vs Control |
|-------------|-----------|---------------------------------------------------------------------------------|---------------|---------------|---------------|---------------|---------------|--------------|---------------|----------------|-------------------------------|---------------------------|
| IPI00385082 | SMC1A     | Structural maintenance of chromosomes protein 1A                                | 141,195       | 222,603       | 178,057       | 182,140       | 26,751        | 53,530       | 48,781        | 47,462         | 1.6                           | 0.02                      |
| IPI00976020 | EIF4G2    | Eukaryotic translation initiation factor 4 gamma 2                              | 341,741       | 512,258       | 520,115       | 519,950       | 75,943        | 62,358       | 108,118       | 45,405         | 1.5                           | 0.005                     |
| IPI00010158 | CHRAC1    | Chromatin accessibility complex protein 1                                       | 1,404,380     | 1,896,855     | 1,460,775     | 1,755,510     | 311,273       | 307,512      | 229,898       | 177,857        | 1.4                           | 0.04                      |
| IPI00152692 | DTD1      | D-tyrosyl-tRNA(Tyr) deacylase 1                                                 | 1,671,200     | 2,281,830     | 1,679,560     | 2,260,300     | 454,362       | 172,074      | 503,049       | 325,300        | 1.4                           | 0.04                      |
| IPI00217477 | HMGB3     | High mobility group protein B3                                                  | 478,317       | 693,140       | 526,453       | 610,379       | 60,791        | 146,108      | 93,727        | 142,292        | 1.4                           | 0.02                      |
| IPI00182313 | SEC61A2   | Protein transport protein Sec61 subunit alpha isoform 2 isoform b               | 236,195       | 323,518       | 283,760       | 326,747       | 46,510        | 64,077       | 70,615        | 38,991         | 1.4                           | 0.04                      |
| IPI00216125 | SRP9      | Signal recognition particle 9 kDa protein isoform 1                             | 1,549,657     | 2,155,080     | 2,190,563     | 1,903,720     | 267,162       | 249,192      | 639,975       | 203,267        | 1.4                           | 0.006                     |
| IPI00394796 | TDRD1     | Tudor domain-containing protein 1, isoform 1                                    | 573,477       | 797,453       | 621,053       | 828,730       | 64,510        | 57,318       | 124,535       | 153,918        | 1.4                           | 0.0004                    |
| IPI00646366 | CEP110    | Centrosomal protein 110kDa                                                      | 642,327       | 866,240       | 1,062,253     | 830,717       | 115,409       | 132,793      | 377,494       | 256,233        | 1.3                           | 0.02                      |
| IPI00642976 | CPNE1     | Copine-1                                                                        | 724,450       | 909,984       | 742,271       | 981,679       | 117,523       | 100,671      | 125,950       | 254,013        | 1.3                           | 0.03                      |
| IPI00980818 | EIF4G2    | Eukaryotic translation initiation factor 4 gamma 2, splice variant or isoform   | 70,444        | 92,894        | 81,148        | 100,996       | 7,419         | 11,310       | 14,981        | 25,429         | 1.3                           | 0.006                     |
| IPI01013328 | HLA-DQB1  | HLA class II histocompatibility antigen, DQ beta 1 chain                        | 2,167,035     | 2,749,280     | 2,414,890     | 2,636,885     | 156,575       | 452,073      | 336,353       | 460,038        | 1.3                           | 0.04                      |
| IPI00172580 | NUP54     | Nucleoporin p54                                                                 | 6,685,450     | 8,466,578     | 7,026,293     | 7,237,768     | 934,335       | 1,140,104    | 1,149,081     | 659,364        | 1.3                           | 0.03                      |
| IPI00218728 | PAFAH1B1  | Platelet-activating factor acetylhydrolase IB subunit alpha, isoform 1          | 1,111,627     | 1,399,207     | 1,192,437     | 1,369,200     | 192,242       | 176,140      | 310,487       | 173,781        | 1.3                           | 0.04                      |
| IPI00745127 | RAP1B     | Ras-related protein Rap-1b                                                      | 82,182        | 109,178       | 101,179       | 110,400       | 8,457         | 21,689       | 31,399        | 24,299         | 1.3                           | 0.05                      |
| IPI00924874 | SRRT      | Serrate RNA effector molecule homolog                                           | 243,561       | 321,083       | 289,016       | 361,634       | 44,688        | 61,932       | 52,921        | 40,404         | 1.3                           | 0.05                      |
| IPI00329791 | DDX46     | ATP-dependent RNA helicase DDX46                                                | 3,908,525     | 4,837,875     | 3,962,415     | 3,886,435     | 634,136       | 511,237      | 817,901       | 618,662        | 1.2                           | 0.03                      |
| IPI00179326 | BAIAP2L1  | Brain-specific angiogenesis inhibitor 1-associated protein 2-like protein 1     | 6,953,610     | 8,264,045     | 8,969,630     | 8,351,179     | 828,656       | 991,997      | 650,029       | 629,725        | 1.2                           | 0.05                      |
| IPI00025366 | CS        | Citrate synthase, mitochondrial                                                 | 6,214,700     | 7,263,405     | 6,561,580     | 7,339,245     | 382,092       | 855,174      | 1,251,901     | 2,082,100      | 1.2                           | 0.04                      |
| IPI00646121 | CPNE1     | Copine-1                                                                        | 1,513,728     | 1,826,694     | 1,614,401     | 1,944,049     | 238,701       | 165,972      | 194,814       | 332,337        | 1.2                           | 0.04                      |
| IPI00058192 | POFUT1    | GDP-fucose protein O-fucosyltransferase 1, isoform 1                            | 3,419,165     | 4,049,335     | 3,337,070     | 3,919,430     | 212,032       | 516,959      | 621,753       | 686,494        | 1.2                           | 0.04                      |
| IPI00305267 | GOLGA3    | Golgin subfamily A member 3, isoform 1                                          | 6,152,930     | 7,328,700     | 6,651,000     | 6,815,500     | 668,387       | 387,438      | 985,603       | 526,099        | 1.2                           | 0.009                     |
| IPI00909600 | GOLGB1    | Golgin subfamily B member 1                                                     | 1,850,345     | 2,206,290     | 2,021,950     | 2,287,355     | 206,147       | 157,250      | 429,640       | 83,995         | 1.2                           | 0.02                      |
| IPI00027445 | HARS2     | Histidyl-tRNA synthetase, mitochondrial                                         | 361,683       | 437,410       | 399,545       | 421,391       | 63,891        | 34,303       | 53,928        | 29,126         | 1.2                           | 0.05                      |
| IPI00020008 | NEDD8     | NEDD8                                                                           | 273,875       | 326,669       | 296,051       | 341,910       | 33,992        | 36,856       | 92,059        | 32,583         | 1.2                           | 0.05                      |
| IPI01009196 | STARD10   | PCTP-like protein                                                               | 2,744,763     | 3,370,201     | 3,092,070     | 4,003,590     | 431,911       | 339,529      | 621,962       | 650,693        | 1.2                           | 0.03                      |
| IPI01009673 | STARD10   | PCTP-like protein, splice variant or isoform                                    | 2,646,075     | 3,265,148     | 2,986,336     | 3,876,259     | 405,739       | 333,255      | 591,817       | 638,922        | 1.2                           | 0.03                      |
| IPI00020557 | LRP1      | Prolow-density lipoprotein receptor-related protein 1                           | 8,780,250     | 10,378,910    | 10,408,000    | 9,921,140     | 1,154,449     | 913,732      | 2,150,171     | 722,800        | 1.2                           | 0.04                      |
| IPI00001757 | RBM8A     | RNA-binding protein 8A, isoform 1                                               | 3,015,580     | 3,499,900     | 3,434,420     | 3,431,910     | 406,322       | 249,444      | 387,557       | 382,437        | 1.2                           | 0.05                      |
| IPI00217437 | TTBK2     | Tau-tubulin kinase                                                              | 7,995,869     | 9,362,155     | 7,834,135     | 8,569,484     | 726,716       | 606,091      | 788,768       | 681,657        | 1.2                           | 0.01                      |
| IPI00009253 | NAPA      | Alpha-soluble NSF attachment protein                                            | 28,648,482    | 32,844,796    | 30,143,276    | 34,995,462    | 2,678,969     | 1,720,208    | 4,968,127     | 3,240,753      | 1.1                           | 0.02                      |
| IPI00022143 | ESYT1     | Extended synaptotagmin-1, isoform 1                                             | 5,335,292     | 6,126,168     | 5,439,788     | 6,124,905     | 490,856       | 505,894      | 842,811       | 506,160        | 1.1                           | 0.04                      |
| IPI00294879 | RANGAP1   | Ran GTPase-activating protein 1                                                 | 17,134,060    | 19,011,805    | 18,174,565    | 21,906,915    | 1,287,867     | 686,403      | 2,499,562     | 1,914,113      | 1.1                           | 0.02                      |
| IPI00021187 | RUVBL1    | RuvB-like 1, isoform 1                                                          | 1,037,672,235 | 1,112,875,465 | 1,084,131,090 | 1,119,546,130 | 34,313,921    | 24,055,727   | 58,424,329    | 55,788,786     | 1.1                           | 0.004                     |
| IPI00788942 | RUVBL1    | RuvB-like 1, isoform 2                                                          | 1,017,675,425 | 1,094,301,655 | 1,062,111,405 | 1,097,480,705 | 37,107,235    | 21,401,489   | 53,743,973    | 55,453,314     | 1.1                           | 0.004                     |
| IPI00017510 | MT-CO2    | Cytochrome c oxidase subunit 2                                                  | 5,380,420     | 4,722,330     | 5,134,330     | 4,947,700     | 339,421       | 513,166      | 539,865       | 670,727        | -1.1                          | 0.04                      |
| IPI00006084 | CNNM2     | Metal transporter CNNM2, isoform 1                                              | 749,720       | 657,723       | 822,085       | 724,275       | 61,993        | 42,332       | 141,092       | 66,543         | -1.1                          | 0.03                      |
| IPI00935307 | DIAPH1    | Protein diaphanous homolog 1                                                    | 1,746,425     | 1,519,913     | 2,124,523     | 1,855,859     | 111,559       | 190,754      | 323,095       | 274,415        | -1.1                          | 0.05                      |
| IPI00302641 | FAT2      | Protocadherin Fat 2                                                             | 5,654,530     | 4,917,580     | 5,273,100     | 5,500,390     | 406,664       | 451,238      | 965,733       | 565,777        | -1.1                          | 0.03                      |
| IPI00032958 | ANLN      | Actin-binding protein anillin, isoform 2                                        | 975,350       | 800,203       | 922,130       | 904,473       | 104,455       | 84,129       | 73,310        | 91,752         | -1.2                          | 0.02                      |
| IPI00924544 | APEH      | Acyamino-acid-releasing enzyme                                                  | 1,697,350     | 1,454,555     | 1,686,378     | 1,810,765     | 122,288       | 142,071      | 233,637       | 109,921        | -1.2                          | 0.02                      |
| IPI00976984 | ARFGAP2   | ADP-ribosylation factor GTPase-activating protein 2                             | 1,701,305     | 1,457,691     | 1,607,516     | 1,462,362     | 104,509       | 91,380       | 140,288       | 219,887        | -1.2                          | 0.004                     |
| IPI00168885 | DHX57     | ATP-dependent RNA helicase DHX57, isoform 1                                     | 2,056,110     | 1,685,140     | 2,328,630     | 2,020,575     | 224,402       | 100,509      | 207,179       | 316,338        | -1.2                          | 0.01                      |
| IPI00929635 | CGN       | Cingulin, isoform 2                                                             | 4,114,885     | 3,493,333     | 3,792,770     | 3,844,550     | 340,127       | 434,926      | 304,691       | 325,034        | -1.2                          | 0.04                      |
| IPI00432026 | DDRGK1    | DDRGK domain-containing protein 1                                               | 293,769       | 243,906       | 294,557       | 301,651       | 36,412        | 29,066       | 39,026        | 59,863         | -1.2                          | 0.04                      |
| IPI00414101 | TOP2A     | DNA topoisomerase 2-alpha, isoform 2                                            | 945,060       | 797,737       | 943,800       | 967,503       | 74,491        | 19,889       | 135,577       | 135,327        | -1.2                          | 0.01                      |
| IPI00027438 | FLOT1     | Flotillin-1                                                                     | 8,977,960     | 7,805,700     | 9,423,739     | 8,611,430     | 933,566       | 699,966      | 1,158,894     | 942,379        | -1.2                          | 0.05                      |
| IPI00220848 | ITGB4     | Integrin beta-4, isoform Beta-4E                                                | 1,426,883     | 1,170,708     | 1,393,578     | 1,256,787     | 149,290       | 173,414      | 145,094       | 116,104        | -1.2                          | 0.04                      |
| IPI00293533 | NUP62     | Nuclear pore glycoprotein p62                                                   | 5,107,810     | 4,355,618     | 4,698,935     | 4,848,740     | 530,649       | 258,222      | 434,803       | 832,803        | -1.2                          | 0.02                      |
| IPI00298058 | SUPT5H    | Transcription elongation factor SPT5, isoform 1                                 | 3,810,335     | 3,156,699     | 3,323,958     | 3,729,383     | 306,052       | 209,654      | 231,209       | 611,854        | -1.2                          | 0.004                     |
| IPI00216508 | SNX3      | Sorting nexin-3, isoform 2                                                      | 4,353,753     | 3,698,053     | 4,430,803     | 4,502,843     | 298,490       | 388,778      | 337,304       | 432,058        | -1.2                          | 0.02                      |
| IPI00984022 | UBA2      | Ubiquitin-like 1-activating enzyme E1B                                          | 3,957,170     | 3,313,365     | 4,357,985     | 4,067,520     | 483,093       | 339,106      | 890,454       | 426,950        | -1.2                          | 0.04                      |
| IPI00007423 | ANP32B    | Acidic leucine-rich nuclear phosphoprotein 32 family member B, isoform 1        | 4,054,730     | 3,218,222     | 3,994,975     | 3,997,505     | 553,723       | 448,795      | 654,486       | 605,342        | -1.3                          | 0.03                      |
| IPI00647001 | ANP32B    | Acidic leucine-rich nuclear phosphoprotein 32 family member B, splice variant o | 3,617,977     | 2,798,910     | 3,541,088     | 3,479,880     | 623,638       | 400,849      | 682,619       | 568,986        | -1.3                          | 0.04                      |
| IPI00148020 | BRSK1     | BR serine/threonine-protein kinase 1, isoform 1                                 | 1,842,635     | 1,420,675     | 1,687,140     | 1,597,120     | 268,239       | 139,542      | 139,596       | 176,727        | -1.3                          | 0.01                      |

|             |         |                                                                                     |            |            |            |            |           |           |           |           |      |        |
|-------------|---------|-------------------------------------------------------------------------------------|------------|------------|------------|------------|-----------|-----------|-----------|-----------|------|--------|
| IPI00181265 | CCDC120 | Coiled-coil domain-containing protein 120                                           | 1,284,453  | 975,378    | 1,262,598  | 998,423    | 176,919   | 163,713   | 147,041   | 160,019   | -1.3 | 0.02   |
| IPI00480056 | RAB4A   | Ras-related protein Rab-4A                                                          | 2,543,707  | 1,945,297  | 2,810,730  | 2,255,630  | 310,863   | 384,725   | 229,631   | 401,640   | -1.3 | 0.03   |
| IPI00789296 | SRP14   | Signal recognition particle 14 kDa protein                                          | 31,569,700 | 24,049,300 | 32,100,400 | 23,331,100 | 3,358,725 | 5,044,425 | 6,060,319 | 2,690,227 | -1.3 | 0.02   |
| IPI00297626 | STXBP3  | Syntaxin-binding protein 3                                                          | 604,690    | 476,746    | 567,451    | 657,401    | 80,380    | 73,402    | 93,316    | 94,190    | -1.3 | 0.03   |
| IPI00472003 | BID     | BH3-interacting domain death agonist, isoform 4                                     | 143,163    | 99,169     | 115,862    | 146,319    | 13,074    | 14,087    | 23,565    | 24,574    | -1.4 | 0.0009 |
| IPI00550364 | PGM2    | Phosphoglucomutase-2                                                                | 2,690,850  | 1,973,080  | 2,752,345  | 2,022,460  | 409,120   | 472,895   | 875,150   | 346,758   | -1.4 | 0.03   |
| IPI00176903 | PTRF    | Polymerase I and transcript release factor, isoform 1                               | 783,997    | 578,407    | 744,507    | 723,453    | 185,151   | 85,210    | 179,333   | 96,435    | -1.4 | 0.05   |
| IPI00219229 | LSM3    | U6 snRNA-associated Sm-like protein LSM3                                            | 6,173,650  | 4,485,710  | 5,129,100  | 5,361,680  | 949,268   | 1,053,870 | 1,049,191 | 1,196,522 | -1.4 | 0.03   |
| IPI00015077 | EIF1    | Eukaryotic translation initiation factor 1                                          | 2,269,502  | 1,545,396  | 2,215,002  | 2,106,153  | 504,231   | 323,050   | 823,104   | 532,938   | -1.5 | 0.03   |
| IPI00872250 | PDZK1   | PDZ domain-containing protein 1P, isoform 1                                         | 1,002,830  | 689,265    | 1,161,155  | 667,728    | 237,202   | 198,304   | 429,933   | 175,589   | -1.5 | 0.05   |
| IPI00384597 | PHC2    | Polyhomeotic 2 homolog                                                              | 4,172,060  | 2,860,900  | 3,461,740  | 3,425,800  | 859,338   | 716,151   | 219,173   | 750,729   | -1.5 | 0.03   |
| IPI00983353 | PPP2R2A | Serine/threonine-protein phosphatase 2A 55 kDa regulatory subunit B alpha isoform 1 | 96,384     | 59,162     | 75,573     | 98,261     | 28,246    | 13,703    | 26,385    | 33,978    | -1.6 | 0.03   |
