# Supplementary material
Source: PubMed Central journal article supplement (PMC3789846)
Supplement: NIHMS487582-supplement-Table_3.pdf [file NIHMS487582-supplement-Table_3.pdf]

**SI Table 3. Proteins altered by 6 h 10 µg/mL Halloysite nanotube exposure.**

| Protein ID  | Gene Name | Protein Name                                                                | Control    | 1ug/ml     | 10ug/ml    | 100ug/ml   | STDEV Control | STDEV 1ug/ml | STDEV 10ug/ml | STDEV 100ug/ml | Fold Change 10ug/ml vs Control | P value 10ug/ml vs Control |
|-------------|-----------|-----------------------------------------------------------------------------|------------|------------|------------|------------|---------------|--------------|---------------|----------------|--------------------------------|----------------------------|
| IPI00978541 | CLNS1A    | Methylosome subunit pICln                                                   | 493,373    | 643,475    | 830,998    | 623,207    | 101,030       | 249,349      | 247,269       | 137,157        | 1.7                            | 0.02                       |
| IPI00013976 | LAMB1     | Laminin subunit beta-1                                                      | 170,361    | 197,059    | 278,966    | 233,371    | 43,110        | 64,016       | 93,598        | 21,491         | 1.6                            | 0.05                       |
| IPI00976020 | EIF4G2    | Eukaryotic translation initiation factor 4 gamma 2                          | 341,741    | 512,258    | 520,115    | 519,950    | 75,943        | 62,358       | 108,118       | 45,405         | 1.5                            | 0.02                       |
| IPI00418663 | KRT28     | Keratin 25D                                                                 | 9,017,390  | 8,033,960  | 13,221,180 | 9,727,580  | 2,197,134     | 2,762,282    | 2,339,918     | 2,242,735      | 1.5                            | 0.02                       |
| IPI00019495 | DYNLT1    | Dynein light chain Tctex-type 1                                             | 6,856,295  | 7,530,500  | 9,327,150  | 7,607,340  | 1,419,505     | 895,379      | 804,285       | 1,227,568      | 1.4                            | 0.01                       |
| IPI00002857 | MAPK14    | Mitogen-activated protein kinase 14, isoform CSBP2                          | 609,020    | 704,100    | 857,883    | 910,667    | 135,851       | 187,878      | 192,570       | 167,616        | 1.4                            | 0.05                       |
| IPI00022202 | SLC25A3   | Phosphate carrier protein, mitochondrial, isoform A                         | 1,676,950  | 1,786,910  | 2,330,485  | 1,651,225  | 335,437       | 250,418      | 555,004       | 278,272        | 1.4                            | 0.05                       |
| IPI00025329 | RPL19     | 60S ribosomal protein L19                                                   | 1,134,947  | 1,365,861  | 1,519,395  | 1,602,500  | 206,258       | 156,239      | 220,345       | 231,168        | 1.3                            | 0.02                       |
| IPI00643842 | PGLS      | 6-phosphogluconolactonase                                                   | 3,078,670  | 3,213,459  | 3,929,085  | 3,540,365  | 567,043       | 665,272      | 380,510       | 641,251        | 1.3                            | 0.02                       |
| IPI00179326 | BAIAP2L1  | Brain-specific angiogenesis inhibitor 1-associated protein 2-like protein 1 | 6,953,610  | 8,264,045  | 8,969,630  | 8,351,179  | 828,656       | 991,997      | 650,029       | 629,725        | 1.3                            | 0.003                      |
| IPI00038378 | ENOPH1    | Enolase-phosphatase E1, isoform 1                                           | 1,159,793  | 1,246,913  | 1,497,390  | 1,328,037  | 100,797       | 336,035      | 206,150       | 100,536        | 1.3                            | 0.01                       |
| IPI00915974 | ITGA6     | Integrin alpha-6                                                            | 273,528    | 273,227    | 346,058    | 332,988    | 44,344        | 53,471       | 43,343        | 47,954         | 1.3                            | 0.03                       |
| IPI00328170 | MOGS      | Mannosyl-oligosaccharide glucosidase                                        | 2,525,155  | 2,766,240  | 3,200,745  | 2,788,945  | 470,653       | 155,587      | 301,429       | 494,771        | 1.3                            | 0.03                       |
| IPI00220030 | PXN       | Paxillin, isoform alpha                                                     | 1,010,463  | 1,055,850  | 1,354,856  | 1,106,377  | 215,138       | 342,242      | 256,224       | 108,955        | 1.3                            | 0.05                       |
| IPI00964062 | PARP8     | Poly [ADP-ribose] polymerase 8                                              | 1,330,680  | 1,602,816  | 1,770,462  | 1,636,900  | 244,217       | 221,732      | 344,489       | 103,445        | 1.3                            | 0.05                       |
| IPI00514853 | PARF      | Putative GTP-binding protein Parf                                           | 1,611,024  | 1,817,181  | 2,060,531  | 1,743,045  | 240,776       | 116,705      | 276,673       | 138,780        | 1.3                            | 0.03                       |
| IPI00032409 | LAMTOR2   | Ragulator complex protein LAMTOR2, isoform 1                                | 975,337    | 1,093,357  | 1,255,633  | 996,607    | 209,468       | 162,741      | 177,904       | 206,527        | 1.3                            | 0.05                       |
| IPI00954850 | STARD9    | stAR-related lipid transfer protein 9                                       | 8,782,680  | 9,249,500  | 11,352,560 | 10,885,170 | 597,645       | 1,701,810    | 945,096       | 1,607,929      | 1.3                            | 0.0009                     |
| IPI00903228 | WDR20     | WD repeat-containing protein 20                                             | 6,801,620  | 7,788,100  | 8,939,070  | 8,007,110  | 798,107       | 868,157      | 1,669,082     | 785,849        | 1.3                            | 0.03                       |
| IPI00647259 | NT5E      | 5'-nucleotidase                                                             | 2,068,067  | 2,133,053  | 2,525,483  | 2,148,720  | 226,901       | 406,181      | 286,726       | 165,064        | 1.2                            | 0.02                       |
| IPI00009456 | NT5E      | 5'-nucleotidase, splice variant or isoform                                  | 4,592,177  | 4,901,708  | 5,409,863  | 5,353,040  | 600,151       | 697,930      | 474,744       | 337,392        | 1.2                            | 0.04                       |
| IPI00908396 | ACTR3     | Actin-like protein 3                                                        | 1,316,597  | 1,518,790  | 1,517,112  | 1,552,825  | 175,540       | 245,000      | 95,135        | 180,588        | 1.2                            | 0.05                       |
| IPI00220797 | ENSA      | Alpha-endosulfine, isoform 2                                                | 3,165,176  | 3,031,382  | 3,751,350  | 3,323,602  | 369,418       | 515,094      | 276,157       | 377,690        | 1.2                            | 0.02                       |
| IPI00445412 | PPP1R13B  | Apoptosis-stimulating of p53 protein 1                                      | 3,482,820  | 3,409,330  | 4,263,690  | 3,478,330  | 587,723       | 713,406      | 240,412       | 428,598        | 1.2                            | 0.03                       |
| IPI00784201 | CEP290    | Centrosomal protein of 290 kDa, isoform 1                                   | 1,219,850  | 1,206,910  | 1,429,295  | 1,265,550  | 125,428       | 136,582      | 166,458       | 194,182        | 1.2                            | 0.05                       |
| IPI00871174 | MYCBP     | C-Myc-binding protein                                                       | 5,297,950  | 5,146,320  | 6,391,240  | 5,405,640  | 700,879       | 1,903,651    | 822,493       | 563,833        | 1.2                            | 0.05                       |
| IPI00019148 | IGBP1     | Immunoglobulin-binding protein 1                                            | 10,211,505 | 10,160,097 | 12,525,870 | 10,829,157 | 1,176,806     | 1,015,988    | 1,269,688     | 837,081        | 1.2                            | 0.02                       |
| IPI00328753 | KTN1      | Kinectin, isoform 1                                                         | 2,250,853  | 2,248,635  | 2,664,640  | 2,526,973  | 195,326       | 127,130      | 154,652       | 298,252        | 1.2                            | 0.006                      |
| IPI00006207 | LRRFIP1   | Leucine-rich repeat flightless-interacting protein 1, isoform 2             | 1,964,859  | 2,081,191  | 2,402,051  | 2,350,525  | 159,588       | 315,270      | 248,608       | 329,975        | 1.2                            | 0.01                       |
| IPI00328415 | CYB5R3    | NADH-cytochrome b5 reductase 3, isoform 1                                   | 1,798,143  | 2,075,053  | 2,237,847  | 2,021,077  | 187,319       | 239,354      | 379,871       | 188,177        | 1.2                            | 0.05                       |
| IPI00295542 | NUCB1     | Nucleobindin-1                                                              | 1,925,867  | 1,965,352  | 2,389,643  | 2,100,113  | 292,305       | 530,725      | 258,226       | 170,351        | 1.2                            | 0.03                       |
| IPI00297241 | URB1      | Nucleolar pre-ribosomal-associated protein 1                                | 8,845,370  | 7,505,000  | 11,004,970 | 8,199,640  | 816,066       | 2,125,416    | 1,192,376     | 963,399        | 1.2                            | 0.01                       |
| IPI01013515 | PTGR1     | Prostaglandin reductase 1                                                   | 3,154,223  | 3,295,703  | 3,798,120  | 3,357,670  | 497,310       | 539,439      | 308,530       | 228,330        | 1.2                            | 0.04                       |
| IPI00292657 | PTGR1     | Prostaglandin reductase 1                                                   | 3,544,943  | 3,668,611  | 4,210,531  | 3,813,075  | 563,933       | 555,635      | 338,854       | 284,756        | 1.2                            | 0.05                       |
| IPI00908375 | SEC23A    | Protein transport protein Sec23A                                            | 277,828    | 305,794    | 335,946    | 320,186    | 35,120        | 50,600       | 31,658        | 51,955         | 1.2                            | 0.03                       |
| IPI00908835 | RAB5B     | Ras-related protein Rab-5B                                                  | 1,051,860  | 1,239,000  | 1,305,535  | 1,388,675  | 137,513       | 255,657      | 204,118       | 123,783        | 1.2                            | 0.05                       |
| IPI00005038 | HRSP12    | Ribonuclease UK114                                                          | 1,551,040  | 1,781,570  | 1,849,415  | 1,638,150  | 213,477       | 189,855      | 182,202       | 365,495        | 1.2                            | 0.04                       |
| IPI00433279 | SLFN5     | Schlafen family member 5, isoform 1                                         | 2,890,390  | 2,632,140  | 3,424,580  | 2,690,460  | 320,393       | 320,247      | 157,047       | 429,549        | 1.2                            | 0.01                       |
| IPI00032140 | SERPINH1  | Serpin H1                                                                   | 41,107,425 | 38,265,089 | 47,827,257 | 45,776,264 | 3,189,281     | 4,823,268    | 5,753,194     | 5,040,867      | 1.2                            | 0.05                       |
| IPI00953321 | STAM      | Signal transducing adapter molecule 1                                       | 1,018,800  | 1,135,617  | 1,189,000  | 1,132,327  | 105,795       | 217,140      | 128,284       | 82,219         | 1.2                            | 0.05                       |
| IPI00019407 | NSDHL     | Sterol-4-alpha-carboxylate 3-dehydrogenase, decarboxylating                 | 1,216,215  | 1,354,340  | 1,505,890  | 1,403,380  | 223,872       | 209,747      | 122,922       | 110,440        | 1.2                            | 0.03                       |
| IPI00019385 | SSR4      | Translocon-associated protein subunit delta                                 | 1,637,560  | 1,460,302  | 2,027,658  | 1,669,634  | 209,412       | 201,283      | 278,269       | 195,489        | 1.2                            | 0.04                       |
| IPI00966946 | NSUN2     | tRNA (cytosine(34)-C(5))-methyltransferase                                  | 2,384,653  | 2,108,020  | 2,903,460  | 2,859,950  | 446,414       | 782,783      | 244,964       | 589,065        | 1.2                            | 0.05                       |
| IPI01010523 | GNS       | N-acetylglucosamine-6-sulfatase                                             | 654,557    | 569,776    | 746,823    | 715,484    | 76,626        | 130,592      | 47,872        | 85,624         | 1.1                            | 0.05                       |
| IPI00027434 | RHOC      | Rho-related GTP-binding protein RhoC                                        | 3,355,413  | 3,286,873  | 3,838,776  | 3,541,732  | 300,120       | 281,841      | 303,725       | 216,017        | 1.1                            | 0.04                       |
| IPI00376844 | UBE2NL    | Ubiquitin-conjugating enzyme E2 N-like                                      | 15,895,995 | 14,849,770 | 17,462,065 | 16,603,585 | 893,130       | 1,468,594    | 753,709       | 615,781        | 1.1                            | 0.02                       |
| IPI00298058 | SUPT5H    | Transcription elongation factor SPT5, isoform                               | 3,810,335  | 3,156,699  | 3,323,958  | 3,729,383  | 306,052       | 209,654      | 231,209       | 611,854        | -1.1                           | 0.02                       |
| IPI00448169 | APOA1BP   | Apolipoprotein A-1 binding protein                                          | 1,956,046  | 1,813,136  | 1,580,154  | 1,917,864  | 109,135       | 352,587      | 205,599       | 259,706        | -1.2                           | 0.007                      |
| IPI00472003 | BID       | BH3-interacting domain death agonist, isoform 4                             | 143,163    | 99,169     | 115,862    | 146,319    | 13,074        | 14,087       | 23,565        | 24,574         | -1.2                           | 0.05                       |
| IPI00798302 | EIF4B     | Eukaryotic translation initiation factor 4B                                 | 4,631,674  | 4,622,503  | 3,820,293  | 5,035,975  | 335,042       | 1,023,536    | 375,116       | 680,196        | -1.2                           | 0.007                      |
| IPI00903190 | GNPDA1    | Glucosamine-6-phosphate isomerase                                           | 554,540    | 571,121    | 459,866    | 584,181    | 62,904        | 48,179       | 19,252        | 69,564         | -1.2                           | 0.03                       |
| IPI00289357 | ULK1      | Serine/threonine-protein kinase ULK1                                        | 2,837,440  | 2,815,545  | 2,319,070  | 3,053,560  | 189,426       | 347,901      | 439,188       | 311,191        | -1.2                           | 0.04                       |
| IPI00009950 | LMAN2     | Vesicular integral-membrane protein VIP36                                   | 4,395,838  | 4,421,830  | 3,701,033  | 4,092,123  | 396,815       | 439,672      | 412,618       | 147,819        | -1.2                           | 0.03                       |
| IPI00297322 | ARFGAP2   | ADP-ribosylation factor GTPase-activating protein 2                         | 1,931,487  | 1,577,049  | 1,443,728  | 1,681,360  | 353,686       | 385,116      | 318,836       | 379,543        | -1.3                           | 0.05                       |

|             |        |                                                           |           |           |           |           |           |           |           |           |      |       |
|-------------|--------|-----------------------------------------------------------|-----------|-----------|-----------|-----------|-----------|-----------|-----------|-----------|------|-------|
| IPI00793890 | ERLIN2 | Erlin-2                                                   | 670,320   | 668,998   | 500,633   | 517,715   | 139,849   | 154,409   | 31,482    | 63,551    | -1.3 | 0.05  |
| IPI00844296 | MUC17  | Mucin-17                                                  | 5,342,390 | 5,212,050 | 4,238,820 | 6,014,060 | 322,065   | 632,259   | 567,403   | 594,884   | -1.3 | 0.005 |
| IPI00335069 | PSMD12 | 26S proteasome non-ATPase regulatory subunit 12 isoform 2 | 2,927,805 | 3,414,800 | 2,080,754 | 2,742,610 | 422,420   | 499,600   | 534,732   | 665,612   | -1.4 | 0.02  |
| IPI00005154 | SSRP1  | FACT complex subunit SSRP1                                | 8,730,640 | 9,139,750 | 5,554,840 | 7,725,460 | 2,436,494 | 2,322,629 | 1,784,439 | 1,127,783 | -1.6 | 0.05  |
| IPI00878105 | RPL9   | 60S ribosomal protein L9                                  | 667,169   | 742,026   | 345,846   | 624,266   | 226,580   | 166,207   | 69,728    | 161,626   | -1.9 | 0.03  |
| IPI00152316 | WDR66  | WD repeat-containing protein 66                           | 3,554,450 | 2,518,350 | 1,367,525 | 3,033,545 | 1,230,398 | 1,511,814 | 72,453    | 776,168   | -2.6 | 0.02  |
