# Supplementary material
Source: PubMed Central journal article supplement (PMC3789846)
Supplement: NIHMS487582-supplement-Table_4.pdf [file NIHMS487582-supplement-Table_4.pdf]

**SI Table 4. Proteins altered by 6 h 100 µg/mL Halloysite nanotube exposure.**

| Protein ID  | Gene Name | Protein Name                                                              | Control    | 1ug/ml     | 10ug/ml    | 100ug/ml   | STDEV Control | STDEV 1ug/ml | STDEV 10ug/ml | STDEV 100ug/ml | Fold Change 100ug/ml vs Control | P value 100ug/ml vs Control |
|-------------|-----------|---------------------------------------------------------------------------|------------|------------|------------|------------|---------------|--------------|---------------|----------------|---------------------------------|-----------------------------|
| IPI0009286  | MLL       | Histone-lysine N-methyltransferase, isoform 1                             | 289,564    | 377,325    | 501,707    | 605,315    | 121,534       | 106,068      | 258,463       | 140,260        | 2.1                             | 0.005                       |
| IPI00300990 | CHTOP     | Chromatin target of PRMT1 protein, isoform 1                              | 726,240    | 899,118    | 1,022,103  | 1,297,238  | 167,696       | 61,615       | 424,231       | 271,201        | 1.8                             | 0.004                       |
| IPI00473047 | PRKAG1    | 5'-AMP-activated protein kinase subunit gamma-1                           | 136,677    | 204,937    | 232,599    | 243,020    | 14,548        | 108,359      | 145,008       | 79,309         | 1.8                             | 0.04                        |
| IPI00893203 | ACP1      | Low molecular weight phosphotyrosine protein phosphatase, splice va       | 5,873,309  | 7,471,358  | 6,165,343  | 9,967,502  | 3,465,160     | 2,108,718    | 1,225,678     | 1,635,298      | 1.7                             | 0.04                        |
| IPI00382703 | ACP1      | Low molecular weight phosphotyrosine protein phosphatase                  | 5,482,525  | 7,126,900  | 5,815,200  | 9,545,800  | 3,408,650     | 2,100,875    | 1,196,781     | 1,598,622      | 1.7                             | 0.04                        |
| IPI00941031 | KIAA1967  | Protein KIAA1967 (Deleted in breast cancer gene 1 protein)                | 4,899,463  | 6,856,400  | 5,629,767  | 8,357,400  | 2,589,226     | 1,879,033    | 1,262,054     | 1,172,990      | 1.7                             | 0.03                        |
| IPI01015519 | STARD10   | StAR-related lipid transfer protein 10 (Serologically defined colon canc  | 1,170,521  | 1,605,511  | 1,343,748  | 2,010,684  | 525,908       | 340,611      | 380,967       | 475,300        | 1.7                             | 0.03                        |
| IPI00746777 | ADH5      | Alcohol dehydrogenase class-3                                             | 16,090,700 | 21,411,850 | 17,251,910 | 26,450,340 | 6,424,735     | 4,080,115    | 3,988,294     | 4,465,816      | 1.6                             | 0.02                        |
| IPI00215920 | ARF6      | ADP-ribosylation factor 6                                                 | 5,266,760  | 6,288,500  | 6,250,720  | 8,295,160  | 1,705,747     | 1,575,530    | 1,192,040     | 948,732        | 1.6                             | 0.008                       |
| IPI00009063 | CAPN9     | Calpain-9, isoform 1                                                      | 1,027,897  | 1,182,243  | 1,211,827  | 1,615,850  | 235,035       | 251,840      | 420,741       | 240,466        | 1.6                             | 0.004                       |
| IPI00908657 | HLA-DRA   | HLA class II histocompatibility antigen, DRalpha chain                    | 5,236,420  | 5,103,550  | 7,100,540  | 8,307,060  | 1,652,419     | 1,782,104    | 2,877,738     | 1,479,082      | 1.6                             | 0.01                        |
| IPI0020906  | IMPA1     | Inositol monophosphatase 1                                                | 765,240    | 1,011,558  | 981,854    | 1,193,138  | 246,031       | 154,140      | 197,052       | 97,186         | 1.6                             | 0.01                        |
| IPI00185146 | IPO9      | Importin-9                                                                | 316,984    | 345,183    | 456,302    | 514,733    | 143,953       | 169,186      | 139,811       | 128,507        | 1.6                             | 0.05                        |
| IPI00925799 | PSMA2     | Proteasome subunit alpha type-2                                           | 12,324,733 | 15,428,517 | 15,433,227 | 19,479,160 | 3,842,558     | 3,367,319    | 2,812,868     | 3,168,883      | 1.6                             | 0.01                        |
| IPI00018370 | SVIL      | Supervillin, isoform 2                                                    | 1,067,365  | 1,372,040  | 1,127,290  | 1,675,700  | 346,343       | 158,134      | 255,234       | 253,344        | 1.6                             | 0.01                        |
| IPI00789452 | WDR61     | WD repeat-containing protein 61                                           | 1,115,121  | 1,227,320  | 1,385,908  | 1,835,047  | 388,267       | 276,115      | 527,436       | 245,892        | 1.6                             | 0.008                       |
| IPI00908516 | ARL1      | ADP-ribosylation factor-like protein 1                                    | 46,956     | 40,543     | 50,216     | 71,631     | 2,152         | 13,167       | 15,464        | 13,614         | 1.5                             | 0.01                        |
| IPI00027412 | CEACAM6   | Carcinoembryonic antigen-related cell adhesion molecule 6                 | 11,571,020 | 15,343,100 | 11,806,910 | 16,875,500 | 4,537,181     | 4,017,846    | 3,666,860     | 2,522,248      | 1.5                             | 0.05                        |
| IPI00794397 | CHMP4A    | Charged multivesicular body protein 4a                                    | 1,331,773  | 1,677,118  | 1,558,440  | 2,042,395  | 439,204       | 503,436      | 470,102       | 333,167        | 1.5                             | 0.02                        |
| IPI00976020 | EIF4G2    | Eukaryotic translation initiation factor 4 gamma 2                        | 341,741    | 512,258    | 520,115    | 519,950    | 75,943        | 62,358       | 108,118       | 45,405         | 1.5                             | 0.002                       |
| IPI00306661 | KCMF1     | E3 ubiquitin-protein ligase KCMF1                                         | 741,393    | 844,279    | 889,933    | 1,090,565  | 143,622       | 180,719      | 281,130       | 113,713        | 1.5                             | 0.003                       |
| IPI00002857 | MAPK14    | Mitogen-activated protein kinase 14, isoform CSBP2                        | 609,020    | 704,100    | 857,883    | 910,667    | 135,851       | 187,878      | 192,570       | 167,616        | 1.5                             | 0.01                        |
| IPI00013214 | MCM3      | DNA replication licensing factor MCM3                                     | 2,770,625  | 2,641,905  | 3,674,035  | 4,240,220  | 895,847       | 957,634      | 1,348,847     | 661,188        | 1.5                             | 0.02                        |
| IPI00908729 | MCM6      | DNA replication licensing factor MCM6                                     | 1,300,765  | 1,297,545  | 1,623,820  | 1,889,850  | 394,699       | 415,248      | 473,393       | 288,812        | 1.5                             | 0.03                        |
| IPI00419692 | PIPSL     | Putative PIP5K1A and PSMD4-like protein                                   | 1,718,035  | 2,137,788  | 1,997,405  | 2,497,428  | 698,687       | 358,955      | 332,356       | 313,990        | 1.5                             | 0.05                        |
| IPI00873730 | POM121L1P | Nuclear envelope pore membrane protein POM 121-like 1                     | 1,297,608  | 1,573,970  | 1,518,829  | 1,946,490  | 475,674       | 64,810       | 391,336       | 149,720        | 1.5                             | 0.04                        |
| IPI00018934 | SCN1A     | Sodium channel protein type 1 subunit alpha, isoform 1                    | 1,217,240  | 1,582,687  | 1,232,483  | 1,794,263  | 440,703       | 146,329      | 305,407       | 347,438        | 1.5                             | 0.05                        |
| IPI00000184 | SCOC      | Short coiled-coil protein, isoform 1                                      | 311,165    | 349,280    | 375,949    | 464,730    | 64,304        | 85,690       | 75,943        | 75,366         | 1.5                             | 0.008                       |
| IPI00924874 | SRRT      | Serrate RNA effector molecule homolog                                     | 243,561    | 321,083    | 289,016    | 361,634    | 44,688        | 61,932       | 52,921        | 40,404         | 1.5                             | 0.002                       |
| IPI01009196 | STARD10   | PCTP-like protein, splice variant or isoform                              | 2,744,763  | 3,370,201  | 3,092,070  | 4,003,590  | 431,911       | 339,529      | 621,962       | 650,693        | 1.5                             | 0.007                       |
| IPI01009673 | STARD10   | PCTP-like protein, splice variant or isoform                              | 2,646,075  | 3,265,148  | 2,986,336  | 3,876,259  | 405,739       | 333,255      | 591,817       | 638,922        | 1.5                             | 0.007                       |
| IPI00973950 | AK3       | Adenylate kinase isoenzyme 4, mitochondrial                               | 5,776,230  | 7,228,550  | 5,597,865  | 8,298,700  | 1,150,303     | 1,080,090    | 1,293,540     | 1,038,073      | 1.4                             | 0.007                       |
| IPI00925567 | AKR1B15   | Aldo-keto reductase family 1 member B15                                   | 477,613    | 449,001    | 560,970    | 684,995    | 151,690       | 166,064      | 217,635       | 63,354         | 1.4                             | 0.02                        |
| IPI00941730 | ARHGAP1   | Rho GTPase-activating protein 1                                           | 236,282    | 255,579    | 380,372    | 333,007    | 20,557        | 80,123       | 133,799       | 42,798         | 1.4                             | 0.002                       |
| IPI00439209 | BAX       | Apoptosis regulator BAX, isoform delta                                    | 550,922    | 628,640    | 570,582    | 765,330    | 96,374        | 103,347      | 114,844       | 160,738        | 1.4                             | 0.03                        |
| IPI00294158 | BLVRA     | Biliverdin reductase A                                                    | 3,027,757  | 3,228,753  | 3,006,180  | 4,303,783  | 498,553       | 851,491      | 908,436       | 973,294        | 1.4                             | 0.03                        |
| IPI00328749 | C20orf160 | Uncharacterized protein C20orf160, isoform 1                              | 4,901,661  | 6,412,502  | 5,348,304  | 6,630,208  | 1,406,140     | 650,480      | 1,875,639     | 538,174        | 1.4                             | 0.05                        |
| IPI00004416 | CHMP2A    | Charged multivesicular body protein 2a                                    | 1,328,171  | 1,440,040  | 1,462,214  | 1,854,652  | 312,242       | 471,103      | 226,223       | 151,342        | 1.4                             | 0.009                       |
| IPI00979052 | CTNND1    | Catenin delta-1                                                           | 229,410    | 296,476    | 263,452    | 324,693    | 50,512        | 59,979       | 33,650        | 36,037         | 1.4                             | 0.009                       |
| IPI01013521 | DDB1      | DNA damage-binding protein 1                                              | 83,726     | 85,589     | 108,949    | 114,051    | 20,430        | 13,291       | 28,778        | 14,737         | 1.4                             | 0.03                        |
| IPI00030320 | DDX6      | Probable ATP-dependent RNA helicase DDX6                                  | 2,613,320  | 3,278,875  | 2,853,330  | 3,708,915  | 492,098       | 716,118      | 529,259       | 644,307        | 1.4                             | 0.02                        |
| IPI00976338 | DECR1     | 2,4-dienoyl-CoA reductase, mitochondrial                                  | 1,454,625  | 1,848,187  | 1,615,149  | 2,035,147  | 481,755       | 303,757      | 167,277       | 255,025        | 1.4                             | 0.04                        |
| IPI00152692 | DTD1      | D-tyrosyl-tRNA(Tyr) deacylase 1                                           | 1,671,200  | 2,281,830  | 1,679,560  | 2,260,300  | 454,362       | 172,074      | 503,049       | 325,300        | 1.4                             | 0.05                        |
| IPI00019329 | DYNLL1    | Dynein light chain 1, cytoplasmic                                         | 797,141    | 1,041,215  | 857,771    | 1,132,856  | 179,269       | 217,846      | 183,147       | 180,794        | 1.4                             | 0.02                        |
| IPI00019463 | EIF2AK2   | Interferon-induced, double-stranded RNA-activated protein kinase          | 321,511    | 292,364    | 390,732    | 455,636    | 72,845        | 72,860       | 153,955       | 106,470        | 1.4                             | 0.05                        |
| IPI00980818 | EIF4G2    | Eukaryotic translation initiation factor 4 gamma 2, splice variant or iso | 70,444     | 92,894     | 81,148     | 100,996    | 7,419         | 11,310       | 14,981        | 25,429         | 1.4                             | 0.05                        |
| IPI00299254 | EIF5B     | Eukaryotic translation initiation factor 5B                               | 7,482,160  | 9,395,080  | 8,225,540  | 10,246,490 | 1,505,755     | 1,816,924    | 1,705,897     | 1,392,964      | 1.4                             | 0.02                        |
| IPI01011710 | ERI3      | Prion protein interacting protein                                         | 611,967    | 630,363    | 689,577    | 828,188    | 126,498       | 116,181      | 210,591       | 48,732         | 1.4                             | 0.02                        |
| IPI00954849 | FCAMR     | High affinity immunoglobulin alpha and immunoglobulin mu Fc recept        | 2,911,680  | 3,271,870  | 3,213,390  | 4,026,030  | 850,325       | 771,897      | 674,155       | 479,065        | 1.4                             | 0.03                        |
| IPI00515014 | GALE      | UDP-galactose-4-epimerase                                                 | 1,018,883  | 1,171,033  | 1,105,527  | 1,385,923  | 281,082       | 239,545      | 219,875       | 201,657        | 1.4                             | 0.05                        |
| IPI00061525 | GNPNAT1   | Glucosamine 6-phosphate N-acetyltransferase                               | 896,788    | 894,700    | 809,783    | 1,288,930  | 247,015       | 245,830      | 418,988       | 172,373        | 1.4                             | 0.02                        |
| IPI00294398 | HADH      | Hydroxyacyl-coenzyme A dehydrogenase, mitochondrial, isoform 1            | 2,650,589  | 3,586,444  | 2,470,861  | 3,794,492  | 812,194       | 588,201      | 655,269       | 645,162        | 1.4                             | 0.04                        |
| IPI00395462 | HYPK      | Huntingtin-interacting protein K, isoform 2                               | 425,187    | 565,081    | 575,236    | 590,315    | 90,588        | 167,780      | 134,267       | 112,384        | 1.4                             | 0.03                        |

|             |              |                                                                          |            |            |            |            |           |           |           |           |     |       |
|-------------|--------------|--------------------------------------------------------------------------|------------|------------|------------|------------|-----------|-----------|-----------|-----------|-----|-------|
| IPI00643131 | KPNA3        | Karyopherin alpha 3                                                      | 3,718,250  | 4,216,930  | 4,104,575  | 5,056,600  | 519,347   | 258,248   | 463,328   | 888,706   | 1.4 | 0.02  |
| IPI00013976 | LAMB1        | Laminin subunit beta-1                                                   | 170,361    | 197,059    | 278,966    | 233,371    | 43,110    | 64,016    | 93,598    | 21,491    | 1.4 | 0.02  |
| IPI00294742 | LARP7        | La-related protein 7, isoform 1                                          | 1,145,210  | 1,148,575  | 1,204,955  | 1,571,370  | 253,960   | 292,025   | 301,808   | 163,974   | 1.4 | 0.01  |
| IPI00979179 | LOC100508996 | hypothetical protein LOC100508996                                        | 3,568,750  | 4,173,400  | 3,828,790  | 4,941,870  | 928,481   | 931,716   | 876,020   | 699,331   | 1.4 | 0.03  |
| IPI00439701 | LOC284804    | hypothetical protein LOC284804                                           | 3,640,250  | 4,229,370  | 4,291,650  | 5,193,930  | 764,973   | 147,585   | 1,047,442 | 103,973   | 1.4 | 0.01  |
| IPI00740026 | LOC644578    | hypothetical protein LOC644578                                           | 5,416,360  | 6,797,220  | 5,880,390  | 7,521,460  | 1,809,644 | 2,294,523 | 1,687,266 | 758,204   | 1.4 | 0.04  |
| IPI00167941 | MDN1         | Midasin                                                                  | 6,190,918  | 7,584,742  | 7,698,691  | 8,822,680  | 1,669,288 | 1,646,820 | 1,973,477 | 1,671,308 | 1.4 | 0.04  |
| IPI00007001 | MRPL11       | 39S ribosomal protein L11, mitochondrial, isoform 1                      | 3,143,900  | 3,513,225  | 3,787,625  | 4,435,610  | 769,345   | 790,820   | 1,016,269 | 971,887   | 1.4 | 0.05  |
| IPI00644506 | NUP93        | Nuclear pore complex protein Nup93                                       | 4,303,120  | 4,786,425  | 4,799,100  | 6,033,985  | 731,764   | 581,887   | 1,468,641 | 641,628   | 1.4 | 0.004 |
| IPI00402061 | NXF4         | Nuclear RNA export factor 2                                              | 4,978,680  | 5,268,190  | 5,706,270  | 7,028,800  | 1,444,091 | 1,287,276 | 2,107,317 | 901,905   | 1.4 | 0.03  |
| IPI00022334 | OAT          | Ornithine aminotransferase, mitochondrial                                | 25,502,311 | 32,921,752 | 28,050,545 | 35,360,804 | 6,254,254 | 6,527,147 | 4,095,188 | 4,650,084 | 1.4 | 0.02  |
| IPI00398922 | PPP1R14B     | Protein phosphatase 1 regulatory subunit 14B                             | 170,373    | 150,778    | 191,961    | 241,346    | 35,574    | 36,017    | 78,999    | 55,520    | 1.4 | 0.04  |
| IPI00024919 | PRDX3        | Thioredoxin-dependent peroxide reductase, mitochondrial                  | 40,989,610 | 45,827,725 | 42,385,115 | 55,618,640 | 1,086,617 | 4,621,464 | 9,224,029 | 4,762,340 | 1.4 | 0.002 |
| IPI00924946 | PRKAR2A      | cAMP-dependent protein kinase type II-alpha regulatory subunit           | 2,815,310  | 3,363,620  | 3,138,197  | 3,856,120  | 325,864   | 530,531   | 759,265   | 528,059   | 1.4 | 0.006 |
| IPI00292000 | PRPF31       | U4/U6 small nuclear ribonucleoprotein, isoform 1                         | 9,895,674  | 11,925,821 | 9,818,396  | 14,187,337 | 2,415,144 | 1,994,145 | 2,638,316 | 2,301,985 | 1.4 | 0.02  |
| IPI00983632 | PSMA5        | Proteasome subunit alpha type-5, isoform 2                               | 793,420    | 960,792    | 724,022    | 1,103,355  | 244,832   | 295,630   | 257,854   | 184,996   | 1.4 | 0.05  |
| IPI00025329 | RPL19        | 60S ribosomal protein L19                                                | 1,134,947  | 1,365,861  | 1,519,395  | 1,602,500  | 206,258   | 156,239   | 220,345   | 231,168   | 1.4 | 0.01  |
| IPI00793341 | RPL4         | 60S ribosomal protein L4                                                 | 1,222,708  | 1,438,626  | 1,474,654  | 1,655,441  | 239,371   | 221,942   | 388,676   | 230,617   | 1.4 | 0.02  |
| IPI00642454 | RPL7A        | Ribosomal protein L7a                                                    | 1,463,205  | 1,831,930  | 1,475,503  | 2,070,928  | 374,356   | 429,304   | 161,345   | 177,789   | 1.4 | 0.01  |
| IPI00555941 | RPS5         | 40S ribosomal protein S5 variant                                         | 2,137,790  | 2,557,210  | 2,450,415  | 3,098,460  | 549,847   | 525,603   | 448,072   | 611,246   | 1.4 | 0.03  |
| IPI00182313 | SEC61A2      | Protein transport protein Sec61 subunit alpha, isoform 2b                | 236,195    | 323,518    | 283,760    | 326,747    | 46,510    | 64,077    | 70,615    | 38,991    | 1.4 | 0.01  |
| IPI00945024 | SND1         | Staphylococcal nuclease domain-containing protein 1                      | 3,396,230  | 4,422,376  | 3,281,190  | 4,814,453  | 1,094,185 | 1,018,873 | 1,062,321 | 324,443   | 1.4 | 0.04  |
| IPI00925997 | SRI          | Sorcin                                                                   | 7,268,805  | 8,580,122  | 8,700,562  | 10,243,352 | 2,098,216 | 1,184,302 | 1,248,699 | 1,285,101 | 1.4 | 0.03  |
| IPI00394796 | TDRD1        | Tudor domain-containing protein 1, isoform 1                             | 573,477    | 797,453    | 621,053    | 828,730    | 64,510    | 57,318    | 124,535   | 153,918   | 1.4 | 0.009 |
| IPI00514310 | TSTD1        | Thiosulfate sulfurtransferase/rhodanese-like domain-containing protei    | 1,415,723  | 1,653,933  | 1,395,883  | 2,022,968  | 240,617   | 239,452   | 370,154   | 217,102   | 1.4 | 0.003 |
| IPI00291946 | USP10        | Ubiquitin carboxyl-terminal hydrolase 10                                 | 6,660,327  | 7,970,877  | 8,062,650  | 9,234,503  | 1,193,265 | 387,373   | 1,293,225 | 1,040,313 | 1.4 | 0.007 |
| IPI00298971 | VTN          | Vitronectin                                                              | 6,962,200  | 8,224,880  | 7,510,225  | 9,426,160  | 1,026,716 | 1,001,860 | 967,422   | 842,106   | 1.4 | 0.003 |
| IPI00640703 | XPO5         | Exportin-5                                                               | 21,550,600 | 27,649,900 | 21,890,800 | 29,959,100 | 4,438,716 | 5,429,183 | 7,262,926 | 4,217,481 | 1.4 | 0.02  |
| IPI00827972 | PARF         | GTP-binding protein Parf                                                 | 960,290    | 1,007,055  | 955,098    | 1,253,767  | 130,598   | 262,382   | 81,379    | 240,292   | 1.3 | 0.04  |
| IPI00042932 | ABCB4        | Multidrug resistance protein 3, isoform 1                                | 2,536,677  | 2,904,337  | 2,637,997  | 3,394,310  | 635,978   | 564,860   | 564,395   | 388,620   | 1.3 | 0.03  |
| IPI00929577 | ABHD2        | Similar to Vesicle-associated membrane protein-associated protein A it   | 637,377    | 790,311    | 746,559    | 840,384    | 162,339   | 204,173   | 150,603   | 116,446   | 1.3 | 0.05  |
| IPI00741635 | ANKRD34C     | Ankyrin repeat domain-containing protein 34C                             | 29,141,200 | 35,715,700 | 27,966,600 | 37,448,300 | 6,728,098 | 8,199,250 | 6,461,121 | 4,080,358 | 1.3 | 0.05  |
| IPI00922006 | AP1S2        | AP-1 complex subunit sigma-2                                             | 2,232,667  | 2,153,011  | 2,302,089  | 2,797,978  | 328,609   | 424,972   | 530,760   | 188,467   | 1.3 | 0.01  |
| IPI00175169 | ARFGAP1      | ADP-ribosylation factor GTPase-activating protein 1, isoform 1           | 838,537    | 842,068    | 820,058    | 1,078,972  | 90,491    | 62,946    | 296,096   | 190,475   | 1.3 | 0.03  |
| IPI00008167 | ATP1B3       | Sodium/potassium-transporting ATPase subunit beta-3                      | 1,028,973  | 1,014,950  | 1,139,217  | 1,329,440  | 113,759   | 109,488   | 174,841   | 139,965   | 1.3 | 0.006 |
| IPI00071059 | BAX          | Apoptosis regulator BAX, isoform epsilon                                 | 2,566,010  | 2,643,376  | 2,723,368  | 3,329,630  | 613,848   | 378,234   | 495,580   | 434,321   | 1.3 | 0.05  |
| IPI00217937 | C1orf101     | Uncharacterized protein C1orf101, isoform 1                              | 2,618,963  | 3,207,037  | 2,665,328  | 3,355,266  | 608,967   | 367,048   | 694,116   | 204,593   | 1.3 | 0.05  |
| IPI00032561 | CAB39        | Calcium-binding protein 39                                               | 4,924,130  | 5,637,190  | 5,187,570  | 6,397,350  | 171,792   | 821,551   | 599,778   | 955,169   | 1.3 | 0.02  |
| IPI00965501 | CANX         | Calnexin, splice variant or isoform                                      | 9,907,040  | 10,434,353 | 11,049,373 | 12,443,242 | 2,340,225 | 1,777,667 | 2,293,894 | 943,283   | 1.3 | 0.05  |
| IPI00442866 | CANX         | Calnexin                                                                 | 1,144,240  | 1,284,463  | 1,352,760  | 1,516,086  | 176,776   | 183,356   | 216,206   | 287,594   | 1.3 | 0.04  |
| IPI00641881 | CAP1         | Adenylyl cyclase-associated protein                                      | 524,650    | 607,392    | 587,452    | 662,460    | 102,695   | 51,808    | 127,206   | 84,846    | 1.3 | 0.05  |
| IPI01010326 | CCAR1        | Cell division cycle and apoptosis regulator protein 1                    | 133,873    | 117,133    | 142,007    | 168,756    | 25,216    | 21,905    | 38,094    | 20,096    | 1.3 | 0.04  |
| IPI00024642 | CCDC47       | Coiled-coil domain-containing protein 47, isoform 1                      | 210,137    | 236,927    | 284,599    | 280,014    | 58,620    | 24,663    | 77,118    | 32,134    | 1.3 | 0.05  |
| IPI00011284 | COMT         | Catechol O-methyltransferase, isoform membrane-bound                     | 19,256,526 | 22,176,213 | 20,055,340 | 24,562,382 | 3,795,862 | 2,630,567 | 4,063,245 | 1,696,323 | 1.3 | 0.02  |
| IPI00892994 | CPNE1        | Copine-1, splice variant or isoform                                      | 1,513,728  | 1,826,694  | 1,614,401  | 1,944,049  | 238,701   | 165,972   | 194,814   | 332,337   | 1.3 | 0.05  |
| IPI00006034 | CRIP2        | Cysteine-rich protein 2                                                  | 3,301,609  | 3,805,506  | 3,604,196  | 4,320,110  | 755,120   | 655,062   | 939,453   | 448,895   | 1.3 | 0.03  |
| IPI00964890 | CTBP1        | C-terminal-binding protein 1                                             | 1,302,723  | 1,630,595  | 1,364,584  | 1,648,510  | 267,927   | 188,241   | 294,970   | 210,026   | 1.3 | 0.05  |
| IPI00967473 | DEK          | Protein DEK                                                              | 1,352,012  | 1,560,256  | 1,519,596  | 1,732,868  | 338,903   | 234,115   | 322,992   | 136,501   | 1.3 | 0.05  |
| IPI00420108 | DLST         | Dihydropolyllysine-residue succinyltransferase component of 2-oxoglu     | 7,850,397  | 7,758,587  | 8,416,087  | 9,892,983  | 1,267,956 | 1,401,458 | 1,625,166 | 718,282   | 1.3 | 0.01  |
| IPI00014845 | DNAH8        | Dynein heavy chain 8, axonemal, isoform 1                                | 301,486    | 360,395    | 402,227    | 400,870    | 35,933    | 49,122    | 92,959    | 84,918    | 1.3 | 0.04  |
| IPI00975639 | DNM3         | Dynamin-3                                                                | 327,887    | 329,598    | 333,141    | 415,501    | 33,281    | 43,361    | 115,228   | 72,348    | 1.3 | 0.04  |
| IPI00062037 | DYNLL2       | Dynein light chain 2, cytoplasmic                                        | 1,776,318  | 2,116,726  | 2,106,930  | 2,370,560  | 417,571   | 514,604   | 716,679   | 191,575   | 1.3 | 0.02  |
| IPI00029631 | ERH          | Enhancer of rudimentary homolog                                          | 12,484,916 | 13,631,211 | 13,790,898 | 16,178,052 | 3,240,297 | 1,484,088 | 2,717,906 | 1,465,492 | 1.3 | 0.05  |
| IPI00964335 | ETF1         | Eukaryotic peptide chain release factor subunit 1                        | 1,341,940  | 1,358,106  | 1,312,340  | 1,760,508  | 272,078   | 231,327   | 348,181   | 108,123   | 1.3 | 0.01  |
| IPI00792673 | ETFA         | Electron transfer flavoprotein subunit alpha, mitochondrial, splice vari | 5,108,682  | 5,650,422  | 5,648,423  | 6,434,453  | 1,074,716 | 452,002   | 1,009,469 | 405,115   | 1.3 | 0.05  |
| IPI00984351 | FAM49B       | Protein FAM49B                                                           | 625,950    | 708,707    | 664,273    | 789,783    | 73,095    | 96,573    | 171,358   | 127,862   | 1.3 | 0.04  |
| IPI00007024 | FAM96B       | Mitotic spindle-associated CMMXD complex subunit MIP18                   | 4,191,249  | 4,213,189  | 4,292,006  | 5,369,463  | 637,562   | 426,271   | 681,439   | 953,462   | 1.3 | 0.05  |
| IPI00789008 | FLOT2        | Flotillin-2                                                              | 3,151,570  | 3,711,835  | 3,043,960  | 4,037,545  | 606,482   | 333,874   | 548,643   | 442,791   | 1.3 | 0.03  |
| IPI00023729 | FN3K         | Fructosamine-3-kinase                                                    | 943,983    | 906,450    | 1,005,080  | 1,196,830  | 96,891    | 105,647   | 147,549   | 203,257   | 1.3 | 0.04  |

|             |           |                                                                |             |             |             |             |            |            |            |            |     |       |
|-------------|-----------|----------------------------------------------------------------|-------------|-------------|-------------|-------------|------------|------------|------------|------------|-----|-------|
| IPI00445716 | GFRA3     | GDNF family receptor alpha-3, isoform 1                        | 773,380     | 849,740     | 806,615     | 981,880     | 142,591    | 27,063     | 179,979    | 88,004     | 1.3 | 0.02  |
| IPI00219673 | GSTK1     | Glutathione S-transferase kappa 1, isoform 1                   | 21,118,590  | 23,550,105  | 22,605,780  | 26,489,755  | 3,926,763  | 1,943,683  | 4,088,662  | 1,297,122  | 1.3 | 0.03  |
| IPI00180386 | GYG1      | Glycogenin-1, isoform GN-1L                                    | 6,731,560   | 6,954,840   | 6,925,553   | 8,707,980   | 1,132,079  | 1,487,892  | 2,598,589  | 1,184,775  | 1.3 | 0.03  |
| IPI00477495 | H2BFS     | Histone H2B type F-S                                           | 4,425,550   | 4,459,520   | 4,606,538   | 5,715,717   | 686,167    | 350,201    | 376,032    | 620,645    | 1.3 | 0.01  |
| IPI00166293 | HIST3H2BB | Histone H2B type 3-B                                           | 2,922,497   | 2,826,713   | 2,987,105   | 3,826,435   | 432,236    | 325,802    | 459,756    | 447,746    | 1.3 | 0.01  |
| IPI00873466 | HPRT1     | Hypoxanthine-guanine phosphoribosyltransferase                 | 3,903,280   | 4,318,352   | 4,262,173   | 4,949,635   | 864,734    | 429,512    | 647,492    | 490,024    | 1.3 | 0.05  |
| IPI00935516 | HSPB1     | Heat shock factor-binding protein 1                            | 1,682,044   | 1,874,240   | 1,872,846   | 2,131,735   | 262,010    | 381,567    | 664,763    | 283,175    | 1.3 | 0.03  |
| IPI00909582 | HSD17B4   | Peroxisomal multifunctional enzyme type 2, isoform 1           | 3,071,462   | 3,649,774   | 3,633,496   | 3,944,238   | 669,299    | 462,144    | 845,587    | 510,345    | 1.3 | 0.05  |
| IPI00305461 | ITIH2     | Inter-alpha (Globulin) inhibitor H2                            | 2,387,967   | 2,568,623   | 2,642,807   | 3,206,510   | 376,710    | 320,115    | 482,272    | 433,742    | 1.3 | 0.01  |
| IPI00175193 | KIF4B     | Chromosome-associated kinesin KIF4B                            | 13,429,300  | 15,251,230  | 14,181,060  | 17,433,000  | 2,000,563  | 1,920,627  | 2,957,032  | 2,475,878  | 1.3 | 0.02  |
| IPI00056414 | MAL2      | Protein MAL2                                                   | 6,192,550   | 7,908,060   | 7,260,110   | 8,238,460   | 1,675,759  | 1,214,435  | 1,521,397  | 1,041,639  | 1.3 | 0.05  |
| IPI00743873 | MAP4      | Microtubule-associated protein 4                               | 981,731     | 1,055,471   | 1,030,049   | 1,283,982   | 86,039     | 86,151     | 187,496    | 103,218    | 1.3 | 0.001 |
| IPI00221142 | MAPK14    | Mitogen-activated protein kinase 14, isoform Mxi2              | 91,873      | 91,797      | 102,560     | 120,280     | 14,342     | 22,724     | 16,154     | 19,960     | 1.3 | 0.03  |
| IPI00154451 | MMS19     | MMS19 nucleotide excision repair protein homolog               | 2,995,582   | 2,822,390   | 3,014,966   | 3,778,708   | 645,666    | 230,498    | 907,739    | 267,687    | 1.3 | 0.04  |
| IPI00397526 | MYH10     | Myosin-10, isoform 1                                           | 16,602,259  | 18,844,646  | 17,323,986  | 21,226,097  | 3,234,862  | 1,319,720  | 3,272,390  | 1,219,011  | 1.3 | 0.03  |
| IPI01012656 | NUMA1     | Nuclear mitotic apparatus protein 1, splice variant or isoform | 7,245,474   | 7,932,217   | 7,739,799   | 9,364,893   | 1,690,385  | 813,231    | 1,116,638  | 1,054,577  | 1.3 | 0.04  |
| IPI00003128 | P4HA2     | Prolyl 4-hydroxylase subunit alpha-2, isoform lib              | 14,703,465  | 16,583,963  | 16,865,503  | 18,454,958  | 2,145,180  | 2,045,080  | 1,426,590  | 1,750,565  | 1.3 | 0.02  |
| IPI00182373 | P4HA2     | Prolyl 4-hydroxylase subunit alpha-2, isoform lia              | 15,046,916  | 16,939,693  | 17,355,343  | 18,934,703  | 2,166,313  | 2,021,459  | 1,557,764  | 1,681,698  | 1.3 | 0.01  |
| IPI00329338 | PCYT1A    | Choline-phosphate cytidyltransferase A                         | 5,090,790   | 6,077,270   | 5,639,320   | 6,486,437   | 1,035,106  | 374,067    | 936,595    | 445,538    | 1.3 | 0.02  |
| IPI00456484 | PDE4DIP   | Myomegalin, isoform 3                                          | 450,905     | 495,953     | 487,743     | 595,195     | 98,577     | 37,702     | 58,915     | 57,038     | 1.3 | 0.02  |
| IPI00976042 | PKP3      | Plakophilin-3                                                  | 707,557     | 750,150     | 818,620     | 900,283     | 163,063    | 164,632    | 332,250    | 82,930     | 1.3 | 0.05  |
| IPI00894274 | PPP1CB    | Serine/threonine-protein phosphatase                           | 1,751,692   | 1,896,538   | 2,092,654   | 2,320,609   | 381,949    | 266,408    | 632,685    | 244,331    | 1.3 | 0.02  |
| IPI00183002 | PPP1R12A  | Protein phosphatase 1 regulatory subunit 12A, isoform 1        | 525,001     | 489,515     | 544,822     | 693,982     | 97,059     | 87,367     | 101,237    | 43,648     | 1.3 | 0.008 |
| IPI00759705 | PPP1R7    | Protein phosphatase 1 regulatory subunit 7, isoform 3          | 2,019,074   | 2,284,096   | 2,120,576   | 2,551,293   | 361,989    | 249,790    | 394,119    | 166,146    | 1.3 | 0.02  |
| IPI00063234 | PRKAR2A   | Protein kinase, cAMP-dependent, regulatory, type II, alpha     | 5,736,364   | 6,291,711   | 6,114,913   | 7,363,367   | 1,133,544  | 704,394    | 1,114,596  | 459,876    | 1.3 | 0.02  |
| IPI00001734 | PSAT1     | Phosphoserine aminotransferase                                 | 12,884,163  | 13,868,688  | 14,065,005  | 16,339,841  | 2,519,652  | 1,361,725  | 1,289,729  | 1,173,517  | 1.3 | 0.02  |
| IPI00219622 | PSMA2     | Proteasome subunit alpha type-2, splice variant or isoform     | 22,889,657  | 25,714,738  | 24,350,851  | 30,530,099  | 5,806,048  | 3,492,532  | 3,483,866  | 4,062,945  | 1.3 | 0.04  |
| IPI00028004 | PSMB3     | Proteasome subunit beta type-3                                 | 1,667,803   | 1,761,683   | 2,097,593   | 2,087,407   | 278,973    | 207,788    | 455,996    | 184,207    | 1.3 | 0.02  |
| IPI00216247 | PSMD4     | Proteasome 26S subunit, non-ATPase, 4                          | 7,236,648   | 8,240,358   | 7,544,522   | 9,229,951   | 1,447,042  | 1,222,707  | 970,945    | 1,280,619  | 1.3 | 0.05  |
| IPI00019178 | PSPH      | Phosphoserine phosphatase                                      | 11,860,660  | 12,056,700  | 12,387,035  | 15,012,800  | 2,514,452  | 1,215,603  | 2,125,546  | 1,463,957  | 1.3 | 0.04  |
| IPI00908835 | RAB5B     | Ras-related protein Rab-5B                                     | 1,051,860   | 1,239,000   | 1,305,535   | 1,388,675   | 137,513    | 255,657    | 204,118    | 123,783    | 1.3 | 0.004 |
| IPI00009700 | RABL5     | Rab-like protein 5, isoform 1                                  | 595,230     | 605,560     | 736,240     | 789,298     | 161,577    | 108,657    | 169,502    | 101,476    | 1.3 | 0.05  |
| IPI00795109 | RAN       | GTP-binding nuclear protein Ran                                | 2,941,870   | 3,260,410   | 3,158,820   | 3,719,316   | 627,147    | 274,795    | 397,512    | 328,553    | 1.3 | 0.04  |
| IPI00294879 | RANGAP1   | Ran GTPase-activating protein 1                                | 17,134,060  | 19,011,805  | 18,174,565  | 21,906,915  | 1,287,867  | 686,403    | 2,499,562  | 1,914,113  | 1.3 | 0.002 |
| IPI00604407 | RBM3      | RNA-binding protein 3                                          | 21,887,547  | 23,918,250  | 21,780,530  | 27,705,480  | 3,393,137  | 1,095,912  | 2,712,326  | 3,664,648  | 1.3 | 0.03  |
| IPI00301204 | RDH13     | Retinol dehydrogenase 13, isoform 1                            | 275,160     | 283,789     | 375,798     | 357,396     | 37,930     | 85,597     | 94,075     | 59,117     | 1.3 | 0.03  |
| IPI00925058 | RPL15     | Ribosomal protein L15                                          | 2,822,140   | 3,275,262   | 3,078,723   | 3,572,377   | 483,926    | 431,545    | 467,926    | 368,596    | 1.3 | 0.02  |
| IPI00926202 | RPL15     | Ribosomal protein L15, splice variant or isoform               | 4,889,743   | 5,709,832   | 5,694,563   | 6,221,687   | 1,105,467  | 488,636    | 1,347,122  | 384,748    | 1.3 | 0.05  |
| IPI00470528 | RPL15     | 60S ribosomal protein L15                                      | 7,005,123   | 8,227,819   | 8,051,337   | 8,939,943   | 1,375,984  | 676,988    | 1,591,995  | 236,483    | 1.3 | 0.03  |
| IPI00794087 | RPL4      | 60S ribosomal protein L4, splice variant or isoform            | 612,318     | 733,563     | 699,222     | 825,223     | 133,849    | 134,635    | 134,229    | 149,531    | 1.3 | 0.05  |
| IPI00790342 | RPL6      | 60S ribosomal protein L6                                       | 4,868,204   | 5,569,204   | 4,865,278   | 6,188,032   | 700,790    | 1,045,685  | 991,555    | 547,139    | 1.3 | 0.01  |
| IPI00299573 | RPL7A     | 60S ribosomal protein L7a                                      | 7,294,922   | 8,655,583   | 7,878,539   | 9,205,704   | 1,263,762  | 1,286,556  | 872,554    | 1,036,117  | 1.3 | 0.03  |
| IPI00742191 | RPS14     | 40S ribosomal protein S14                                      | 2,060,780   | 2,296,550   | 2,191,010   | 2,763,673   | 584,237    | 548,251    | 566,348    | 224,278    | 1.3 | 0.05  |
| IPI00027463 | S100A6    | Protein S100-A6                                                | 352,396,740 | 408,845,530 | 430,184,660 | 456,880,880 | 73,141,486 | 52,001,898 | 68,409,487 | 30,341,151 | 1.3 | 0.02  |
| IPI00305152 | SEC31A    | Protein transport protein Sec31A, isoform 3                    | 448,537     | 462,381     | 538,414     | 584,189     | 65,824     | 58,764     | 127,411    | 70,551     | 1.3 | 0.01  |
| IPI00852953 | SELENBP1  | Selenium binding protein 1                                     | 202,713     | 230,998     | 211,160     | 264,704     | 27,600     | 24,683     | 24,866     | 36,779     | 1.3 | 0.02  |
| IPI01011716 | SELENBP1  | Selenium binding protein 1, splice variant or isoform          | 4,219,697   | 4,582,125   | 4,151,630   | 5,403,088   | 946,688    | 401,291    | 895,801    | 646,661    | 1.3 | 0.05  |
| IPI00031608 | SPATA5L1  | Spermatogenesis-associated protein 5-like protein 1, isoform 1 | 1,762,025   | 1,826,815   | 1,631,320   | 2,223,605   | 318,867    | 312,350    | 274,481    | 210,107    | 1.3 | 0.03  |
| IPI00013930 | STX6      | Syntaxin-6                                                     | 906,141     | 968,680     | 1,130,305   | 1,214,940   | 242,908    | 134,310    | 273,454    | 179,156    | 1.3 | 0.05  |
| IPI00293162 | SUGP2     | SURP and G-patch domain-containing protein 2, isoform 3        | 205,029     | 208,189     | 254,890     | 261,952     | 30,475     | 32,890     | 40,048     | 31,345     | 1.3 | 0.02  |
| IPI00299149 | SUMO2     | Small ubiquitin-related modifier 2                             | 1,946,282   | 2,070,592   | 2,228,755   | 2,442,943   | 364,885    | 238,444    | 537,985    | 318,707    | 1.3 | 0.05  |
| IPI00218132 | TBL1X     | F-box-like/WD repeat-containing protein TBL1X, isoform 2       | 792,416     | 902,604     | 825,236     | 1,002,567   | 162,153    | 135,517    | 200,170    | 103,950    | 1.3 | 0.04  |
| IPI00027977 | TMPRSS3   | Transmembrane protease serine 3, isoform 5                     | 4,817,100   | 5,460,400   | 5,176,980   | 6,078,250   | 989,859    | 558,911    | 765,970    | 422,653    | 1.3 | 0.03  |
| IPI00847646 | TNKS1BP1  | 182 kDa tankyrase-1-binding protein, isoform 2                 | 7,809,910   | 8,605,923   | 8,202,658   | 9,972,053   | 1,653,000  | 919,326    | 1,788,866  | 901,470    | 1.3 | 0.03  |
| IPI00007836 | TRPC5     | Short transient receptor potential channel 5                   | 2,070,810   | 2,105,780   | 2,318,380   | 2,639,540   | 449,704    | 477,050    | 541,828    | 130,063    | 1.3 | 0.05  |
| IPI00979268 | TXNRD1    | Thioredoxin reductase 1, cytoplasmic                           | 491,509     | 533,829     | 574,786     | 652,428     | 118,225    | 97,333     | 57,857     | 95,136     | 1.3 | 0.05  |
| IPI00000684 | UAP1      | UDP-N-acetylhexosamine pyrophosphorylase, isoform AGX2         | 2,860,183   | 3,174,453   | 2,957,820   | 3,693,053   | 670,976    | 281,844    | 654,084    | 279,619    | 1.3 | 0.03  |
| IPI00028957 | UBE4A     | Ubiquitin conjugation factor E4 A, isoform 2                   | 1,171,238   | 1,258,403   | 1,192,075   | 1,496,690   | 197,594    | 135,134    | 250,382    | 85,875     | 1.3 | 0.01  |
| IPI00984968 | UBQLN4    | Ubiquilin-4                                                    | 1,078,997   | 926,220     | 1,203,866   | 1,393,059   | 257,500    | 392,105    | 321,042    | 149,774    | 1.3 | 0.05  |

|             |          |                                                                               |             |             |             |             |            |            |            |           |     |       |
|-------------|----------|-------------------------------------------------------------------------------|-------------|-------------|-------------|-------------|------------|------------|------------|-----------|-----|-------|
| IPI00019276 | UBXN6    | UBX domain-containing protein 6, isoform 1                                    | 2,418,820   | 2,490,570   | 2,628,880   | 3,166,270   | 390,086    | 546,956    | 797,886    | 539,215   | 1.3 | 0.04  |
| IPI00008445 | URM1     | Ubiquitin-related modifier 1 homolog, isoform 1                               | 1,428,487   | 1,677,437   | 1,607,960   | 1,849,677   | 277,745    | 134,107    | 401,256    | 131,927   | 1.3 | 0.02  |
| IPI00030915 | USP8     | Ubiquitin carboxyl-terminal hydrolase 8                                       | 169,208     | 180,158     | 188,999     | 223,284     | 41,342     | 28,620     | 49,525     | 25,625    | 1.3 | 0.04  |
| IPI00909711 | VCL      | Vinculin                                                                      | 1,236,659   | 1,399,341   | 1,591,012   | 1,572,082   | 143,179    | 122,595    | 590,497    | 193,007   | 1.3 | 0.01  |
| IPI00956475 | VTN      | Vitronectin, splice variant or isoform                                        | 3,978,030   | 4,598,210   | 4,078,505   | 5,308,200   | 650,636    | 809,138    | 547,933    | 757,693   | 1.3 | 0.02  |
| IPI00976656 | WASF2    | Wiskott-Aldrich syndrome protein family member 2, isoform 2                   | 1,576,098   | 2,021,761   | 1,607,790   | 2,043,618   | 265,021    | 463,287    | 406,831    | 356,870   | 1.3 | 0.05  |
| IPI00019269 | WDR61    | WD repeat-containing protein 61, splice variant or isoform                    | 3,571,601   | 3,930,250   | 4,041,398   | 4,558,827   | 714,518    | 594,503    | 863,875    | 298,370   | 1.3 | 0.02  |
| IPI00216319 | YWHAH    | 14-3-3 protein eta                                                            | 12,187,990  | 13,744,520  | 13,513,969  | 15,800,570  | 2,758,873  | 1,476,950  | 2,341,443  | 2,103,507 | 1.3 | 0.05  |
| IPI00019376 | SEPT11   | Septin-11, isoform 2                                                          | 10,212,164  | 11,540,597  | 10,316,110  | 12,277,852  | 1,776,701  | 1,011,669  | 1,553,084  | 835,125   | 1.2 | 0.05  |
| IPI00217751 | NAGL1    | Sodium-dependent glucose transporter 1                                        | 25,463,800  | 25,544,600  | 22,951,300  | 30,955,600  | 4,258,879  | 1,923,426  | 7,318,633  | 2,550,445 | 1.2 | 0.04  |
| IPI01011965 | ACO1     | Iron regulatory protein 1                                                     | 16,389,412  | 16,586,202  | 17,674,897  | 19,921,183  | 3,133,986  | 1,042,603  | 3,644,045  | 1,388,753 | 1.2 | 0.05  |
| IPI00020530 | ACOT13   | Acyl-coenzyme A thioesterase 13                                               | 5,710,050   | 5,938,325   | 5,802,950   | 6,843,770   | 887,352    | 642,007    | 916,034    | 608,233   | 1.2 | 0.05  |
| IPI01013413 | ACTR3    | Actin-like protein 3, splice variant or isoform                               | 2,349,087   | 2,641,455   | 2,623,612   | 2,874,692   | 350,103    | 355,497    | 239,600    | 227,684   | 1.2 | 0.02  |
| IPI01012480 | ACTR3    | Actin-like protein 3                                                          | 2,456,194   | 2,744,996   | 2,722,400   | 3,012,517   | 367,400    | 351,078    | 259,365    | 259,127   | 1.2 | 0.02  |
| IPI00030706 | AHSA1    | Activator of 90 kDa heat shock protein ATPase homolog 1                       | 8,794,857   | 9,775,085   | 9,298,640   | 10,436,276  | 1,154,950  | 865,095    | 1,044,956  | 918,142   | 1.2 | 0.04  |
| IPI00105407 | AKR1B10  | Aldo-keto reductase family 1 member B10                                       | 90,710,940  | 100,419,105 | 87,664,314  | 107,631,367 | 10,576,669 | 12,097,496 | 13,396,435 | 8,158,419 | 1.2 | 0.02  |
| IPI00642560 | AKR1C1   | Aldo-keto reductase family 1 member C1                                        | 2,189,733   | 2,324,463   | 2,272,010   | 2,701,812   | 336,058    | 292,773    | 265,134    | 289,941   | 1.2 | 0.03  |
| IPI00100559 | AP1S1    | AP-1 complex subunit sigma-1A, isoform 2                                      | 5,152,487   | 5,082,141   | 5,109,479   | 6,149,698   | 782,270    | 542,427    | 718,011    | 604,914   | 1.2 | 0.05  |
| IPI00017891 | APC2     | Adenomatous polyposis coli protein 2, isoform 2                               | 3,410,198   | 3,970,085   | 3,428,438   | 4,174,243   | 652,561    | 334,878    | 295,712    | 297,996   | 1.2 | 0.04  |
| IPI00926864 | APEH     | Acylamino-acid-releasing enzyme                                               | 1,460,041   | 1,528,386   | 1,593,579   | 1,731,872   | 207,689    | 137,180    | 143,804    | 123,673   | 1.2 | 0.04  |
| IPI00337741 | APEH     | Acylamino-acid-releasing enzyme, splice variant or isoform                    | 13,637,061  | 14,630,686  | 14,225,114  | 16,817,372  | 2,933,422  | 1,350,557  | 2,903,821  | 1,175,856 | 1.2 | 0.05  |
| IPI00792538 | APEX1    | DNA-(apurinic or pyrimidinic site) lyase                                      | 7,526,257   | 7,748,043   | 7,653,550   | 8,746,720   | 1,105,677  | 725,328    | 1,193,401  | 484,410   | 1.2 | 0.05  |
| IPI00179326 | BAIAP2L1 | Brain-specific angiogenesis inhibitor 1-associated protein 2-like protein     | 6,953,610   | 8,264,045   | 8,969,630   | 8,351,179   | 828,656    | 991,997    | 650,029    | 629,725   | 1.2 | 0.02  |
| IPI00028392 | C1orf116 | Specifically androgen-regulated gene protein, isoform 1                       | 4,798,235   | 4,974,299   | 5,008,545   | 5,882,590   | 602,907    | 913,219    | 893,169    | 708,859   | 1.2 | 0.03  |
| IPI00796630 | C1QB     | Complement component 1 Q subcomponent-binding protein, mitochondria           | 2,048,093   | 2,137,097   | 2,103,123   | 2,362,557   | 224,563    | 239,027    | 353,291    | 214,412   | 1.2 | 0.05  |
| IPI00920959 | C2orf81  | HCG40743                                                                      | 23,187,700  | 24,103,000  | 23,356,000  | 27,612,300  | 3,240,285  | 2,660,703  | 4,045,957  | 2,621,516 | 1.2 | 0.04  |
| IPI00395627 | CACVBP   | Calcylin-binding protein, isoform 1                                           | 13,054,354  | 14,819,960  | 13,379,727  | 16,205,340  | 1,928,249  | 1,578,829  | 2,823,812  | 1,858,915 | 1.2 | 0.03  |
| IPI00020599 | CALR     | Calreticulin                                                                  | 105,641,785 | 110,473,952 | 107,055,336 | 125,104,006 | 17,161,135 | 10,459,406 | 19,078,835 | 8,332,472 | 1.2 | 0.05  |
| IPI00964308 | CANX     | Calnexin, splice variant or isoform                                           | 4,670,625   | 4,967,906   | 5,089,554   | 5,701,979   | 790,694    | 648,886    | 874,321    | 499,859   | 1.2 | 0.04  |
| IPI00020984 | CANX     | Calnexin, splice variant or isoform                                           | 20,692,710  | 23,210,866  | 22,630,747  | 24,855,900  | 3,763,849  | 3,607,439  | 5,072,148  | 1,625,444 | 1.2 | 0.05  |
| IPI00008274 | CAP1     | Adenylyl cyclase-associated protein 1, isoform 1                              | 17,142,496  | 17,879,626  | 18,489,005  | 20,305,295  | 1,720,211  | 325,606    | 2,332,929  | 1,365,072 | 1.2 | 0.01  |
| IPI00446140 | CAPN2    | Calpain 2, large                                                              | 252,871     | 229,555     | 272,396     | 308,661     | 47,343     | 49,890     | 48,427     | 28,799    | 1.2 | 0.05  |
| IPI00908400 | CAPZA2   | F-actin capping protein alpha-2 subunit                                       | 3,855,698   | 3,808,782   | 4,111,892   | 4,466,083   | 455,071    | 272,120    | 722,572    | 205,642   | 1.2 | 0.03  |
| IPI00026185 | CAPZB    | F-actin-capping protein subunit beta, isoform 1                               | 11,651,369  | 11,892,177  | 11,217,532  | 13,978,073  | 1,671,516  | 1,014,021  | 1,732,558  | 501,194   | 1.2 | 0.03  |
| IPI00903103 | CAPZB    | Capping protein (Actin filament) muscle Z-line, beta                          | 4,763,056   | 4,845,759   | 4,724,410   | 5,631,197   | 552,230    | 736,746    | 541,989    | 321,608   | 1.2 | 0.02  |
| IPI00982182 | CCS      | Copper chaperone for superoxide dismutase                                     | 880,543     | 995,207     | 880,053     | 1,078,350   | 122,607    | 223,724    | 230,987    | 24,024    | 1.2 | 0.02  |
| IPI00302927 | CCT4     | T-complex protein 1 subunit delta                                             | 16,090,961  | 18,396,470  | 18,006,171  | 19,290,217  | 2,607,472  | 2,309,426  | 3,501,671  | 972,258   | 1.2 | 0.05  |
| IPI00016786 | CDC42    | Cell division control protein 42 homolog, isoform 2                           | 22,801,083  | 24,754,621  | 24,248,445  | 27,058,853  | 3,115,522  | 1,509,208  | 4,763,377  | 1,630,626 | 1.2 | 0.03  |
| IPI00301869 | CDHR5    | Cadherin-related family member 5, isoform 2                                   | 5,256,283   | 5,892,560   | 5,536,942   | 6,262,522   | 889,340    | 1,068,098  | 1,202,112  | 413,592   | 1.2 | 0.05  |
| IPI00953536 | CDHR5    | Cadherin-related family member 5                                              | 3,802,950   | 4,210,850   | 4,068,375   | 4,590,375   | 533,856    | 626,066    | 902,541    | 493,983   | 1.2 | 0.04  |
| IPI00978796 | CFL1     | Cofilin-1                                                                     | 16,083,676  | 16,790,003  | 15,963,005  | 19,251,007  | 2,668,975  | 1,630,003  | 3,096,519  | 1,533,907 | 1.2 | 0.05  |
| IPI00295857 | COPA     | Coatomer subunit alpha, isoform 1                                             | 10,793,390  | 11,209,515  | 12,000,125  | 12,805,925  | 1,661,658  | 738,698    | 2,021,654  | 1,002,751 | 1.2 | 0.05  |
| IPI00966084 | COPS4    | COP9 signalosome complex subunit 4                                            | 4,708,702   | 5,193,946   | 5,401,537   | 5,873,219   | 917,713    | 819,116    | 839,933    | 424,161   | 1.2 | 0.03  |
| IPI00018452 | CPNE1    | Copine-1                                                                      | 3,852,281   | 4,347,198   | 3,903,691   | 4,686,172   | 446,984    | 335,602    | 590,364    | 504,561   | 1.2 | 0.02  |
| IPI00176698 | CYCS     | Cytochrome c                                                                  | 643,627     | 751,640     | 731,447     | 772,627     | 104,197    | 120,457    | 181,192    | 47,496    | 1.2 | 0.04  |
| IPI00000760 | DDAH2    | N(G),N(G)-dimethylarginine dimethylaminohydrolase 2                           | 3,687,000   | 4,080,510   | 3,945,200   | 4,436,830   | 430,051    | 397,770    | 856,686    | 547,298   | 1.2 | 0.04  |
| IPI00017617 | DDX5     | ATP-dependent RNA helicase DDX5                                               | 15,292,422  | 16,338,093  | 15,440,918  | 18,572,896  | 2,830,277  | 2,041,464  | 2,938,646  | 1,436,489 | 1.2 | 0.05  |
| IPI00396435 | DHX15    | Putative pre-mRNA-splicing factor ATP-dependent RNA helicase DHX15            | 16,512,734  | 17,068,271  | 17,772,756  | 20,526,238  | 1,976,513  | 2,136,528  | 2,464,190  | 1,151,915 | 1.2 | 0.004 |
| IPI00926319 | DLD      | Dihydrolipoyl dehydrogenase, mitochondrial                                    | 3,833,550   | 4,116,167   | 3,911,398   | 4,610,288   | 575,200    | 317,672    | 773,424    | 461,326   | 1.2 | 0.05  |
| IPI00015947 | DNAJB1   | DnaJ homolog subfamily B member 1                                             | 7,634,020   | 7,515,310   | 7,590,210   | 8,891,075   | 966,749    | 981,840    | 1,329,708  | 706,393   | 1.2 | 0.05  |
| IPI00235412 | DNM1L    | Dynamin-1-like protein                                                        | 1,420,139   | 1,383,083   | 1,445,651   | 1,702,694   | 126,418    | 110,929    | 234,128    | 158,324   | 1.2 | 0.01  |
| IPI00556437 | DNM2     | Dynamin 2, isoform 4 variant                                                  | 1,651,963   | 1,740,904   | 1,748,361   | 2,032,299   | 251,336    | 157,567    | 213,797    | 61,065    | 1.2 | 0.03  |
| IPI00221332 | DNM3     | Dynamin-3, isoform 1                                                          | 578,294     | 585,981     | 577,931     | 671,669     | 81,098     | 47,895     | 151,687    | 43,383    | 1.2 | 0.05  |
| IPI00011898 | EIF2B5   | Translation initiation factor eIF-2B subunit epsilon                          | 2,397,165   | 2,618,955   | 2,603,135   | 2,975,435   | 432,019    | 395,177    | 311,923    | 319,930   | 1.2 | 0.04  |
| IPI00015952 | EIF4G2   | Eukaryotic translation initiation factor 4 gamma 2, splice variant or isoform | 1,910,625   | 2,101,935   | 2,149,497   | 2,355,393   | 233,688    | 253,104    | 287,335    | 311,305   | 1.2 | 0.03  |
| IPI00902463 | ESYT1    | Extended synaptotagmin-1                                                      | 3,266,387   | 3,951,703   | 3,325,443   | 3,967,840   | 440,805    | 561,429    | 746,169    | 481,075   | 1.2 | 0.04  |
| IPI00010810 | ETFA     | Electron transfer flavoprotein subunit alpha, mitochondrial                   | 15,563,932  | 16,515,967  | 15,652,233  | 18,869,508  | 3,041,005  | 1,461,224  | 2,609,186  | 1,238,795 | 1.2 | 0.05  |
| IPI01015096 | FAM129B  | Niban-like protein 1                                                          | 1,808,946   | 1,979,642   | 1,748,629   | 2,192,605   | 322,156    | 242,161    | 542,896    | 187,900   | 1.2 | 0.05  |
| IPI00908715 | FDFT1    | Squalene synthetase                                                           | 2,289,848   | 2,410,497   | 2,440,173   | 2,811,615   | 346,247    | 342,975    | 447,297    | 330,772   | 1.2 | 0.04  |



|             |           |                                                                        |            |            |            |             |            |           |            |           |     |       |
|-------------|-----------|------------------------------------------------------------------------|------------|------------|------------|-------------|------------|-----------|------------|-----------|-----|-------|
| IPI00030229 | GALE      | UDP-glucose 4-epimerase                                                | 6,870,419  | 7,493,092  | 7,053,961  | 8,334,200   | 1,062,013  | 677,079   | 665,478    | 648,003   | 1.2 | 0.03  |
| IPI00553131 | GALE      | UDP-glucose 4-epimerase, splice variant or isoform                     | 11,587,313 | 12,249,422 | 11,834,049 | 13,783,872  | 1,880,870  | 951,027   | 1,055,974  | 1,043,714 | 1.2 | 0.05  |
| IPI00783097 | GARS      | Glycyl-tRNA synthetase                                                 | 57,111,364 | 56,885,615 | 56,517,548 | 66,068,674  | 7,348,309  | 4,567,653 | 8,659,389  | 4,683,930 | 1.2 | 0.05  |
| IPI00219025 | GLRX      | Glutaredoxin-1                                                         | 8,636,047  | 9,115,460  | 9,388,907  | 10,569,369  | 1,687,009  | 960,886   | 1,489,134  | 707,406   | 1.2 | 0.05  |
| IPI00030207 | GMDS      | GDP-mannose 4,6 dehydratase                                            | 3,833,779  | 3,791,785  | 3,782,521  | 4,557,045   | 317,820    | 502,524   | 862,222    | 286,120   | 1.2 | 0.005 |
| IPI00909600 | GOLGB1    | Golgin subfamily B member 1 (Fragment)                                 | 1,850,345  | 2,206,290  | 2,021,950  | 2,287,355   | 206,147    | 157,250   | 429,640    | 83,995    | 1.2 | 0.002 |
| IPI01011936 | GSR       | Glutathione reductase, mitochondrial                                   | 1,384,831  | 1,357,714  | 1,414,286  | 1,609,521   | 98,047     | 162,627   | 194,390    | 193,413   | 1.2 | 0.05  |
| IPI00513927 | GSTO1     | Glutathione S-transferase omega-1 isoform 2                            | 5,461,492  | 6,016,140  | 6,043,670  | 6,778,948   | 562,144    | 772,781   | 1,035,203  | 440,091   | 1.2 | 0.003 |
| IPI00054042 | GTF2I     | General transcription factor II-I, isoform 1                           | 8,173,103  | 8,824,458  | 8,693,043  | 9,671,395   | 1,054,694  | 1,021,604 | 1,185,679  | 560,854   | 1.2 | 0.02  |
| IPI00220855 | H2AFJ     | Histone H2A.J, isoform 1                                               | 8,631,774  | 9,143,202  | 8,782,009  | 10,745,609  | 1,844,877  | 871,667   | 1,603,114  | 966,856   | 1.2 | 0.05  |
| IPI00219037 | H2AFX     | Histone H2A.x                                                          | 17,339,182 | 18,190,289 | 18,135,744 | 21,521,502  | 3,480,974  | 1,552,961 | 3,186,967  | 1,949,070 | 1.2 | 0.05  |
| IPI00644697 | HEBP2     | Heme-binding protein 2, splice variant or isoform                      | 5,895,210  | 6,171,830  | 5,773,610  | 6,918,120   | 618,055    | 577,927   | 1,067,124  | 357,650   | 1.2 | 0.01  |
| IPI00003799 | HEBP2     | Heme-binding protein 2, isoform 2                                      | 4,916,285  | 5,094,580  | 4,845,145  | 5,782,070   | 580,218    | 492,632   | 1,024,734  | 391,720   | 1.2 | 0.02  |
| IPI00513685 | HEBP2     | Heme-binding protein 2                                                 | 978,925    | 1,077,250  | 928,465    | 1,136,050   | 78,921     | 174,952   | 57,142     | 70,143    | 1.2 | 0.01  |
| IPI00220403 | HIST1H2BB | Histone H2B type 1-B                                                   | 3,824,112  | 3,600,489  | 3,983,699  | 4,755,146   | 370,152    | 363,287   | 304,981    | 439,855   | 1.2 | 0.007 |
| IPI00028160 | HMBS      | Porphobilinogen deaminase, isoform 1                                   | 518,720    | 482,928    | 589,293    | 606,451     | 46,569     | 112,557   | 124,106    | 61,942    | 1.2 | 0.04  |
| IPI00335009 | HMCN2     | Hemicentin-2, isoform 3                                                | 4,428,793  | 4,644,273  | 5,100,263  | 5,440,896   | 626,570    | 429,705   | 1,032,574  | 254,701   | 1.2 | 0.01  |
| IPI00008934 | HMGCS2    | Hydroxymethylglutaryl-CoA synthase, mitochondrial, splice variant or i | 14,378,995 | 14,389,070 | 14,339,290 | 17,498,765  | 2,504,551  | 991,944   | 2,868,614  | 1,328,246 | 1.2 | 0.04  |
| IPI00956392 | HMGCS2    | Hydroxymethylglutaryl-CoA synthase, mitochondrial                      | 13,393,400 | 13,221,750 | 13,386,500 | 16,378,400  | 2,388,062  | 890,841   | 2,618,698  | 1,305,455 | 1.2 | 0.04  |
| IPI00879501 | HNRNPA1L2 | Heterogeneous nuclear ribonucleoprotein A1-like 2                      | 1,557,922  | 1,583,267  | 1,633,252  | 1,820,219   | 170,167    | 203,440   | 269,194    | 130,582   | 1.2 | 0.03  |
| IPI00218493 | HPRT1     | Hypoxanthine-guanine phosphoribosyltransferase, splice variant or iso  | 9,208,670  | 9,854,282  | 10,123,363 | 11,385,875  | 1,287,967  | 757,234   | 1,305,768  | 525,128   | 1.2 | 0.008 |
| IPI00019912 | HSD17B4   | Peroxisomal multifunctional enzyme type 2                              | 12,588,807 | 14,225,734 | 13,643,816 | 15,276,143  | 2,301,523  | 1,438,514 | 2,692,847  | 1,208,781 | 1.2 | 0.05  |
| IPI01013542 | HSD17B4   | Peroxisomal multifunctional enzyme type 2, splice variant or isoform   | 10,400,509 | 11,701,192 | 10,892,996 | 12,564,437  | 1,943,217  | 1,125,439 | 2,087,462  | 843,738   | 1.2 | 0.05  |
| IPI00011134 | HSPA7     | Heat shock 70 kDa protein 7                                            | 703,447    | 721,692    | 682,965    | 850,490     | 106,159    | 89,612    | 147,775    | 62,970    | 1.2 | 0.03  |
| IPI00024284 | HSPG2     | Basement membrane-specific heparan sulfate proteoglycan core prote     | 6,223,203  | 6,812,840  | 7,238,867  | 7,517,110   | 904,516    | 922,605   | 595,693    | 769,175   | 1.2 | 0.04  |
| IPI00910755 | HSPH1     | Heat-shock protein 105 kDa                                             | 12,612,815 | 13,138,131 | 13,728,351 | 15,628,785  | 1,870,236  | 1,334,702 | 2,802,564  | 895,070   | 1.2 | 0.01  |
| IPI00908988 | HSPH1     | Heat-shock protein 105 kDa, splice variant or isoform                  | 3,651,205  | 3,807,720  | 4,278,607  | 4,489,948   | 614,800    | 475,983   | 685,258    | 270,632   | 1.2 | 0.02  |
| IPI00397820 | KIF26B    | Kinesin-like protein KIF26B, isoform 2                                 | 1,465,015  | 1,711,440  | 1,668,565  | 1,729,520   | 215,411    | 240,330   | 340,959    | 48,195    | 1.2 | 0.05  |
| IPI00012837 | KIF5B     | Kinesin-1 heavy chain                                                  | 66,288,757 | 69,471,391 | 69,512,013 | 76,918,531  | 8,660,528  | 5,411,569 | 8,327,383  | 2,843,618 | 1.2 | 0.05  |
| IPI00009865 | KRT10     | Keratin, type I cytoskeletal 10                                        | 37,239,695 | 38,972,590 | 34,766,897 | 45,441,797  | 5,292,518  | 5,905,144 | 2,938,987  | 1,985,382 | 1.2 | 0.02  |
| IPI00376379 | KRT77     | Keratin, type II cytoskeletal 1b                                       | 37,439,100 | 41,387,120 | 38,870,480 | 45,489,870  | 6,414,259  | 6,021,130 | 4,861,597  | 4,456,067 | 1.2 | 0.05  |
| IPI00419237 | LAP3      | Cytosol aminopeptidase, isoform 1                                      | 17,719,059 | 19,183,529 | 18,120,785 | 21,370,214  | 2,654,940  | 1,775,524 | 2,950,136  | 1,469,896 | 1.2 | 0.03  |
| IPI00008918 | LIMA1     | LIM domain and actin-binding protein 1, isoform beta                   | 14,893,340 | 15,643,444 | 16,791,333 | 17,416,467  | 1,581,780  | 1,627,706 | 2,571,433  | 1,285,057 | 1.2 | 0.02  |
| IPI00883896 | LIMA1     | LIM domain and actin-binding protein 1, isoform 4                      | 18,493,170 | 19,392,864 | 20,234,853 | 21,675,997  | 1,782,179  | 2,158,472 | 2,932,621  | 1,339,599 | 1.2 | 0.01  |
| IPI00220466 | LIMA1     | LIM domain and actin-binding protein 1, isoform 3                      | 7,266,418  | 7,852,593  | 8,469,073  | 8,523,935   | 676,607    | 625,013   | 1,561,240  | 849,024   | 1.2 | 0.03  |
| IPI00796705 | LIMA1     | LIM domain and actin-binding protein 1                                 | 13,649,230 | 14,379,569 | 15,312,303 | 15,966,262  | 1,204,836  | 1,430,163 | 2,741,251  | 1,039,962 | 1.2 | 0.01  |
| IPI00790831 | LMNB1     | Lamin-B1                                                               | 36,499,647 | 37,337,708 | 38,188,492 | 42,039,994  | 4,264,445  | 2,737,144 | 4,704,878  | 3,118,470 | 1.2 | 0.05  |
| IPI00217975 | LMNB1     | Lamin-B1, splice variant or isoform                                    | 92,714,515 | 95,399,578 | 92,876,670 | 108,008,064 | 12,637,904 | 5,964,057 | 10,510,541 | 7,913,493 | 1.2 | 0.05  |
| IPI00006207 | LRRFIP1   | Leucine-rich repeat flightless-interacting protein 1, isoform 2        | 1,964,859  | 2,081,191  | 2,402,051  | 2,350,525   | 159,588    | 315,270   | 248,608    | 329,975   | 1.2 | 0.05  |
| IPI01014050 | MMS19     | MMS19 nucleotide excision repair homolog, splice variant or isoform    | 2,769,772  | 2,579,966  | 2,731,142  | 3,409,000   | 507,569    | 256,644   | 786,756    | 280,565   | 1.2 | 0.04  |
| IPI00947554 | MST4      | Serine/threonine-protein kinase MST4                                   | 7,578,669  | 8,089,230  | 8,462,837  | 9,046,133   | 760,028    | 1,298,568 | 833,162    | 588,638   | 1.2 | 0.009 |
| IPI00794900 | MTHFD1    | C-1-tetrahydrofolate synthase, cytoplasmic                             | 55,140,515 | 59,057,235 | 55,777,681 | 68,478,600  | 11,802,219 | 6,158,568 | 9,374,951  | 5,923,942 | 1.2 | 0.05  |
| IPI00798071 | NAP1L4    | Nucleosome assembly protein 1-like 4                                   | 4,303,547  | 4,214,841  | 4,591,018  | 4,985,561   | 467,767    | 493,675   | 434,104    | 378,850   | 1.2 | 0.04  |
| IPI00980509 | NAP1L4    | Nucleosome assembly protein 1-like 4, splice variant or isoform        | 573,826    | 576,869    | 546,881    | 713,277     | 118,885    | 49,593    | 89,587     | 65,404    | 1.2 | 0.05  |
| IPI00009253 | NAPA      | Alpha-soluble NSF attachment protein                                   | 28,648,482 | 32,844,796 | 30,143,276 | 34,995,462  | 2,678,969  | 1,720,208 | 4,968,127  | 3,240,753 | 1.2 | 0.01  |
| IPI00022078 | NDRG1     | Protein NDRG1                                                          | 19,820,101 | 21,934,352 | 21,515,133 | 24,255,539  | 3,648,974  | 2,174,759 | 3,644,701  | 813,475   | 1.2 | 0.05  |
| IPI00020008 | NEDD8     | NEDD8                                                                  | 273,875    | 326,669    | 296,051    | 341,910     | 33,992     | 36,856    | 92,059     | 32,583    | 1.2 | 0.01  |
| IPI00376904 | NSFL1C    | NSFL1 cofactor p47, isoform 4                                          | 9,078,240  | 9,755,443  | 9,074,554  | 11,040,227  | 1,589,419  | 665,021   | 1,670,081  | 965,864   | 1.2 | 0.05  |
| IPI00443534 | NSFL1C    | NSFL1 cofactor p47                                                     | 5,227,880  | 5,222,500  | 5,150,160  | 6,350,900   | 836,621    | 405,587   | 942,749    | 527,261   | 1.2 | 0.03  |
| IPI00306369 | NSUN2     | tRNA (cytosine-5-)-methyltransferase NSUN2                             | 9,822,456  | 10,088,118 | 10,461,110 | 11,959,896  | 963,742    | 510,689   | 1,171,450  | 808,086   | 1.2 | 0.005 |
| IPI00009456 | NTSE      | 5'-nucleotidase                                                        | 4,592,177  | 4,901,708  | 5,409,863  | 5,353,040   | 600,151    | 697,930   | 474,744    | 337,392   | 1.2 | 0.04  |
| IPI00984011 | NUDT5     | ADP-sugar pyrophosphatase                                              | 443,868    | 492,677    | 471,652    | 545,690     | 13,014     | 53,400    | 79,549     | 71,484    | 1.2 | 0.03  |
| IPI00002349 | NUFIP2    | Nuclear fragile X mental retardation-interacting protein 2             | 7,268,140  | 7,335,920  | 8,417,360  | 8,631,250   | 791,352    | 595,670   | 1,612,849  | 968,392   | 1.2 | 0.04  |
| IPI00006196 | NUMA1     | Nuclear mitotic apparatus protein 1, isoform 2                         | 30,277,592 | 31,857,865 | 31,579,992 | 35,475,457  | 4,456,520  | 2,711,668 | 5,111,232  | 2,560,772 | 1.2 | 0.05  |
| IPI01015783 | NUMA1     | Nuclear mitotic apparatus protein 1                                    | 1,731,335  | 1,776,614  | 1,711,532  | 2,000,326   | 156,385    | 142,407   | 311,496    | 191,542   | 1.2 | 0.04  |
| IPI00397904 | NUP93     | Nuclear pore complex protein Nup93, splice variant or isoform          | 18,924,560 | 19,985,655 | 19,269,800 | 22,139,615  | 1,799,578  | 1,819,943 | 2,353,889  | 1,468,831 | 1.2 | 0.01  |
| IPI00976543 | PAFAH1B2  | Platelet-activating factor acetylhydrolase IB subunit beta, isoform c  | 6,359,465  | 6,449,910  | 6,644,305  | 7,560,337   | 622,615    | 307,240   | 857,920    | 594,859   | 1.2 | 0.01  |
| IPI00289746 | PAK1      | Serine/threonine-protein kinase PAK 1, isoform 2                       | 6,593,510  | 7,163,030  | 6,834,643  | 7,784,773   | 860,230    | 787,817   | 859,976    | 416,667   | 1.2 | 0.02  |
| IPI00985496 | PAK1      | Serine/threonine-protein kinase PAK 1, splice variant or isoform       | 2,341,907  | 2,465,028  | 2,555,549  | 2,788,429   | 274,907    | 343,251   | 399,042    | 55,259    | 1.2 | 0.02  |

|             |          |                                                                        |            |            |            |            |           |           |           |           |     |       |
|-------------|----------|------------------------------------------------------------------------|------------|------------|------------|------------|-----------|-----------|-----------|-----------|-----|-------|
| IPI00977723 | PAK1     | Serine/threonine-protein kinase PAK 1, splice variant or isoform       | 5,720,577  | 6,142,917  | 5,877,903  | 6,837,826  | 804,759   | 638,484   | 848,594   | 238,559   | 1.2 | 0.03  |
| IPI00827972 | PARF     | Putative GTP-binding protein Parf                                      | 1,650,152  | 1,721,505  | 1,650,367  | 2,021,771  | 175,111   | 228,107   | 138,458   | 290,852   | 1.2 | 0.04  |
| IPI00964062 | PARP8    | Poly [ADP-ribose] polymerase 8                                         | 1,330,680  | 1,602,816  | 1,770,462  | 1,636,900  | 244,217   | 221,732   | 344,489   | 103,445   | 1.2 | 0.03  |
| IPI00641498 | PDZK1    | Na(+)/H(+) exchange regulatory cofactor NHE-RF3                        | 3,393,960  | 3,587,520  | 3,731,667  | 3,977,527  | 337,228   | 339,457   | 1,210,226 | 347,694   | 1.2 | 0.03  |
| IPI00027252 | PHB2     | Prohibitin-2                                                           | 8,039,751  | 8,869,174  | 8,525,210  | 9,930,978  | 1,316,729 | 492,744   | 1,485,530 | 779,961   | 1.2 | 0.02  |
| IPI00797822 | PHB2     | Prohibitin-2, splice variant or isoform                                | 8,028,761  | 8,873,629  | 8,192,785  | 9,830,398  | 1,448,674 | 498,098   | 1,260,324 | 589,695   | 1.2 | 0.03  |
| IPI00216184 | PICALM   | Phosphatidylinositol-binding clathrin assembly protein, isoform 2      | 7,622,331  | 8,201,016  | 8,008,217  | 9,038,885  | 919,263   | 663,355   | 784,163   | 631,795   | 1.2 | 0.02  |
| IPI00980475 | PICALM   | Phosphatidylinositol-binding clathrin assembly protein                 | 4,184,611  | 4,806,331  | 4,480,317  | 5,052,413  | 617,405   | 305,956   | 664,075   | 299,455   | 1.2 | 0.02  |
| IPI00922656 | PIK3C2G  | Phosphatidylinositol-4-phosphate 3-kinase C2 domain-containing gam     | 4,584,490  | 4,827,960  | 4,857,280  | 5,389,680  | 372,489   | 666,327   | 707,980   | 476,904   | 1.2 | 0.02  |
| IPI01016003 | PITRM1   | Pitriylsin metallopeptidase 1                                          | 11,388,420 | 12,927,770 | 13,834,370 | 14,015,300 | 1,949,689 | 1,257,191 | 3,736,961 | 1,677,100 | 1.2 | 0.05  |
| IPI00005264 | PKP2     | Plakophilin-2, isoform 2                                               | 2,524,837  | 2,573,958  | 2,707,808  | 3,022,307  | 292,479   | 452,927   | 268,108   | 372,680   | 1.2 | 0.05  |
| IPI00181283 | PLCB3    | 1-phosphatidylinositol-4,5-bisphosphate phosphodiesterase beta-3 iso   | 424,172    | 463,166    | 496,458    | 518,422    | 74,014    | 30,964    | 125,094   | 52,769    | 1.2 | 0.05  |
| IPI00306354 | PLEKHA1  | Pleckstrin homology domain-containing family A member 1                | 1,004,915  | 1,040,478  | 1,139,215  | 1,157,570  | 102,915   | 123,452   | 244,807   | 100,074   | 1.2 | 0.04  |
| IPI00794787 | POF1B    | Protein POF1B, isoform 3, splice variant or isoform                    | 4,639,830  | 5,058,300  | 5,132,243  | 5,764,377  | 278,073   | 681,657   | 657,676   | 515,287   | 1.2 | 0.003 |
| IPI00103242 | POF1B    | Protein POF1B, isoform 1                                               | 10,226,755 | 11,130,725 | 11,165,783 | 12,690,022 | 1,487,871 | 1,147,558 | 1,256,878 | 1,334,100 | 1.2 | 0.02  |
| IPI00219171 | POU2F1   | POU domain, class 2, transcription factor 1, isoform 2                 | 185,220    | 226,871    | 205,272    | 220,415    | 22,648    | 38,687    | 40,914    | 13,399    | 1.2 | 0.02  |
| IPI00003927 | PPID     | Peptidyl-prolyl cis-trans isomerase D                                  | 867,627    | 834,720    | 991,953    | 1,022,861  | 50,904    | 178,604   | 260,356   | 76,569    | 1.2 | 0.005 |
| IPI00922647 | PPL      | Periplakin                                                             | 2,935,850  | 2,926,060  | 2,977,965  | 3,574,865  | 539,668   | 324,490   | 512,831   | 226,716   | 1.2 | 0.04  |
| IPI00027423 | PPP1CA   | Serine/threonine-protein phosphatase PP1-alpha catalytic subunit, iso  | 4,233,860  | 4,423,630  | 4,582,383  | 5,137,484  | 688,285   | 177,886   | 927,360   | 354,615   | 1.2 | 0.03  |
| IPI00218236 | PPP1CB   | Serine/threonine-protein phosphatase PP1-beta catalytic subunit        | 10,044,656 | 11,349,948 | 10,724,849 | 12,305,966 | 1,247,020 | 1,476,800 | 1,710,629 | 502,536   | 1.2 | 0.006 |
| IPI00983167 | PPP2CB   | Serine/threonine-protein phosphatase 2A catalytic subunit beta, isofo  | 3,299,933  | 3,693,090  | 3,660,947  | 3,884,553  | 485,065   | 344,065   | 673,187   | 178,269   | 1.2 | 0.05  |
| IPI00794777 | PRDX2    | Peroxiredoxin-2                                                        | 14,307,727 | 15,327,343 | 15,669,127 | 17,078,250 | 2,304,710 | 514,558   | 1,677,757 | 1,146,002 | 1.2 | 0.04  |
| IPI00027350 | PRDX2    | Peroxiredoxin-2, splice variant or isoform                             | 36,776,107 | 38,821,978 | 38,521,016 | 43,146,660 | 5,697,439 | 2,511,926 | 4,636,998 | 2,490,547 | 1.2 | 0.05  |
| IPI00217053 | PRRC1    | Protein PRRC1, isoform 3                                               | 3,100,777  | 3,172,668  | 3,157,249  | 3,707,180  | 500,556   | 267,377   | 724,574   | 219,436   | 1.2 | 0.04  |
| IPI00788896 | PSMB3    | Proteasome subunit beta type-3, splice variant or isoform              | 3,330,393  | 3,847,490  | 4,041,917  | 4,070,420  | 603,013   | 542,837   | 596,991   | 356,636   | 1.2 | 0.05  |
| IPI01015219 | PSMC2    | 26S protease regulatory subunit 7                                      | 8,530,405  | 9,379,905  | 9,624,150  | 10,577,195 | 976,437   | 1,266,513 | 1,519,320 | 770,762   | 1.2 | 0.006 |
| IPI00021435 | PSMC2    | 26S protease regulatory subunit 7, splice variant or isoform           | 20,733,990 | 22,139,360 | 21,402,530 | 24,935,985 | 3,228,219 | 1,848,154 | 3,434,789 | 1,590,858 | 1.2 | 0.03  |
| IPI00012268 | PSMD2    | 26S proteasome non-ATPase regulatory subunit 2                         | 14,292,600 | 15,613,408 | 15,189,080 | 17,276,145 | 2,348,932 | 577,172   | 2,028,823 | 841,949   | 1.2 | 0.04  |
| IPI00022694 | PSMD4    | 26S proteasome non-ATPase regulatory subunit 4, isoform Rpn10A         | 10,005,048 | 10,889,818 | 10,103,077 | 12,332,141 | 1,822,282 | 1,172,898 | 1,569,138 | 1,250,781 | 1.2 | 0.05  |
| IPI00977375 | PUF60    | Poly(U)-binding-splicing factor PUF60                                  | 1,492,612  | 1,456,480  | 1,469,357  | 1,729,699  | 170,359   | 146,548   | 218,161   | 127,297   | 1.2 | 0.04  |
| IPI00925046 | QARS     | Glutaminyl-tRNA synthetase                                             | 1,825,522  | 2,144,755  | 2,312,859  | 2,189,845  | 202,865   | 381,698   | 711,232   | 253,198   | 1.2 | 0.04  |
| IPI00334174 | RAB1A    | Ras-related protein Rab-1A, isoform 2                                  | 3,245,190  | 3,302,735  | 3,971,671  | 3,940,029  | 597,101   | 658,928   | 735,953   | 285,430   | 1.2 | 0.05  |
| IPI00011268 | RALY     | RNA-binding protein Raly                                               | 2,470,140  | 2,472,514  | 2,355,848  | 3,069,082  | 491,412   | 306,319   | 495,297   | 237,143   | 1.2 | 0.04  |
| IPI00024320 | RBM3     | Putative RNA-binding protein 3                                         | 32,680,877 | 34,796,480 | 32,021,120 | 40,202,620 | 4,230,839 | 1,730,782 | 3,518,669 | 3,137,524 | 1.2 | 0.01  |
| IPI00939558 | RBMX     | RNA-binding motif protein, X chromosome                                | 24,710,136 | 26,442,392 | 26,828,931 | 30,508,982 | 4,424,294 | 3,336,899 | 3,607,627 | 2,956,401 | 1.2 | 0.04  |
| IPI00304692 | RBMX     | Heterogeneous nuclear ribonucleoprotein G                              | 29,871,431 | 32,225,742 | 32,675,431 | 36,705,548 | 4,889,008 | 3,491,767 | 4,348,475 | 3,268,624 | 1.2 | 0.03  |
| IPI00978626 | RCN1     | Reticulocalbin-1                                                       | 5,242,104  | 6,011,172  | 5,652,599  | 6,465,855  | 830,408   | 602,635   | 1,099,146 | 525,253   | 1.2 | 0.02  |
| IPI00219153 | RPL22    | 60S ribosomal protein L22                                              | 2,064,695  | 2,229,610  | 2,140,980  | 2,387,825  | 177,565   | 286,479   | 430,896   | 241,872   | 1.2 | 0.04  |
| IPI00219155 | RPL27    | 60S ribosomal protein L27                                              | 2,704,135  | 2,732,515  | 2,799,540  | 3,154,205  | 251,579   | 266,156   | 319,552   | 347,821   | 1.2 | 0.05  |
| IPI00216237 | RPL36    | 60S ribosomal protein L36                                              | 16,762,260 | 18,034,120 | 17,204,280 | 19,828,460 | 2,117,902 | 1,488,722 | 2,501,443 | 1,126,229 | 1.2 | 0.02  |
| IPI00030179 | RPL7     | 60S ribosomal protein L7                                               | 14,739,616 | 15,687,937 | 15,804,881 | 18,109,991 | 1,385,679 | 1,815,989 | 2,669,944 | 2,600,741 | 1.2 | 0.03  |
| IPI00478896 | RPL7A    | Ribosomal protein L7a, splice variant or isoform                       | 3,558,262  | 3,818,613  | 3,513,879  | 4,361,114  | 660,046   | 623,879   | 663,935   | 187,895   | 1.2 | 0.05  |
| IPI00017448 | RPS21    | 40S ribosomal protein S21                                              | 18,590,114 | 21,783,189 | 18,268,299 | 23,212,839 | 3,537,925 | 2,191,921 | 3,071,871 | 1,199,883 | 1.2 | 0.04  |
| IPI00418813 | RPS27A   | Ribosomal protein S27a                                                 | 1,277,264  | 1,314,633  | 1,332,432  | 1,530,477  | 214,578   | 79,005    | 192,887   | 115,005   | 1.2 | 0.05  |
| IPI00419880 | RPS3A    | 40S ribosomal protein S3a                                              | 10,613,239 | 11,169,855 | 10,375,861 | 12,389,128 | 1,245,599 | 975,270   | 1,094,162 | 720,544   | 1.2 | 0.02  |
| IPI00062120 | S100A16  | Protein S100-A16                                                       | 20,359,810 | 20,031,530 | 21,931,000 | 24,676,300 | 2,172,343 | 2,108,172 | 1,796,367 | 1,597,114 | 1.2 | 0.007 |
| IPI00217766 | SCARB2   | Lysosome membrane protein 2                                            | 12,564,715 | 13,487,514 | 12,109,455 | 14,579,731 | 1,256,955 | 1,110,362 | 1,502,146 | 572,218   | 1.2 | 0.01  |
| IPI00299086 | SDCBP    | Syntenin-1, isoform 1                                                  | 1,309,026  | 1,403,548  | 1,389,461  | 1,543,811  | 162,988   | 185,172   | 266,516   | 162,159   | 1.2 | 0.05  |
| IPI00106642 | SDF2L1   | Dihydropyrimidinase-like 2                                             | 9,164,044  | 9,604,049  | 10,243,038 | 11,121,418 | 1,433,227 | 447,255   | 1,329,857 | 660,388   | 1.2 | 0.02  |
| IPI00852838 | SELENBP1 | Selenium binding protein 1, splice variant or isoform                  | 1,687,083  | 1,766,910  | 1,794,673  | 2,009,817  | 275,328   | 213,420   | 220,580   | 113,036   | 1.2 | 0.04  |
| IPI00386118 | SF1      | Splicing factor 1                                                      | 312,293    | 260,212    | 317,723    | 380,367    | 49,055    | 71,353    | 77,535    | 38,689    | 1.2 | 0.04  |
| IPI00221106 | SF3B2    | Splicing factor 3B subunit 2                                           | 18,312,855 | 18,991,007 | 18,984,320 | 22,297,123 | 2,968,611 | 2,208,957 | 3,326,953 | 1,395,063 | 1.2 | 0.03  |
| IPI00221101 | SI       | Sucrase-isomaltase, intestinal                                         | 9,585,500  | 10,595,890 | 10,943,920 | 11,428,430 | 897,024   | 1,436,018 | 2,143,364 | 1,558,617 | 1.2 | 0.05  |
| IPI00219420 | SMC3     | Structural maintenance of chromosomes protein 3                        | 9,411,805  | 10,339,039 | 9,104,440  | 11,089,174 | 1,316,958 | 1,363,171 | 1,308,265 | 986,997   | 1.2 | 0.05  |
| IPI00140420 | SND1     | Staphylococcal nuclease domain-containing protein 1, splice variant or | 34,664,094 | 35,413,091 | 34,903,648 | 40,128,754 | 3,885,596 | 4,022,829 | 4,433,669 | 1,665,399 | 1.2 | 0.02  |
| IPI00910438 | SND1     | Staphylococcal nuclease domain-containing protein 1, splice variant or | 28,593,584 | 30,074,112 | 29,597,096 | 33,709,003 | 3,349,527 | 3,569,955 | 4,161,554 | 1,166,223 | 1.2 | 0.02  |
| IPI00183274 | SNX1     | Sorting nexin-1 isoform c                                              | 9,434,735  | 10,703,383 | 9,622,318  | 11,154,413 | 1,392,859 | 883,152   | 1,679,273 | 660,067   | 1.2 | 0.04  |
| IPI00414264 | SRI      | Sorcin, splice variant or isoform                                      | 19,699,401 | 20,617,462 | 21,775,063 | 23,912,201 | 2,976,236 | 1,199,167 | 2,165,654 | 1,976,403 | 1.2 | 0.03  |
| IPI00027175 | SRI      | Sorcin, splice variant or isoform                                      | 19,785,460 | 20,685,730 | 21,863,937 | 24,015,587 | 3,002,427 | 1,202,290 | 2,192,935 | 1,977,818 | 1.2 | 0.03  |

|             |          |                                                                     |               |               |               |               |            |            |            |            |      |       |
|-------------|----------|---------------------------------------------------------------------|---------------|---------------|---------------|---------------|------------|------------|------------|------------|------|-------|
| IPI00216125 | SRP9     | Signal recognition particle 9 kDa protein isoform 1                 | 1,549,657     | 2,155,080     | 2,190,563     | 1,903,720     | 267,162    | 249,192    | 639,975    | 203,267    | 1.2  | 0.05  |
| IPI00215884 | SRSF1    | Serine/arginine-rich splicing factor 1, isoform ASF-1               | 18,193,910    | 19,246,890    | 18,731,256    | 21,840,572    | 2,722,690  | 1,195,125  | 2,353,494  | 1,224,863  | 1.2  | 0.03  |
| IPI00012340 | SRSF9    | Serine/arginine-rich splicing factor 9                              | 8,706,365     | 10,230,561    | 9,716,525     | 10,854,470    | 1,572,486  | 854,362    | 1,940,006  | 1,016,668  | 1.2  | 0.03  |
| IPI01014618 | STARD10  | PCTP-like protein, splice variant or isoform                        | 8,845,755     | 9,571,280     | 9,224,707     | 10,720,073    | 1,165,150  | 760,298    | 1,383,482  | 1,236,998  | 1.2  | 0.04  |
| IPI00186008 | STARD10  | PCTP-like protein, splice variant or isoform                        | 10,048,055    | 10,607,700    | 10,406,887    | 11,996,288    | 1,175,844  | 741,260    | 1,513,833  | 1,405,695  | 1.2  | 0.04  |
| IPI01015270 | STARD10  | PCTP-like protein, splice variant or isoform                        | 8,210,263     | 8,597,234     | 8,319,925     | 9,729,405     | 996,718    | 565,920    | 1,268,185  | 1,063,304  | 1.2  | 0.05  |
| IPI00954850 | STARD9   | stAR-related lipid transfer protein 9                               | 8,782,680     | 9,249,500     | 11,352,560    | 10,885,170    | 597,645    | 1,701,810  | 945,096    | 1,607,929  | 1.2  | 0.04  |
| IPI00930562 | SUB1     | Activated RNA polymerase II transcription cofactor 4                | 2,592,120     | 2,601,995     | 2,365,755     | 3,097,165     | 353,465    | 488,255    | 321,110    | 245,737    | 1.2  | 0.03  |
| IPI00239415 | SYNE2    | Nesprin-2                                                           | 1,308,936     | 1,344,200     | 1,551,803     | 1,566,650     | 183,589    | 169,698    | 207,318    | 113,828    | 1.2  | 0.03  |
| IPI00909626 | TBCA     | Tubulin-specific chaperone A                                        | 5,889,515     | 5,786,908     | 5,776,115     | 6,992,660     | 776,963    | 657,212    | 673,142    | 410,971    | 1.2  | 0.02  |
| IPI00202873 | TBL1Y    | F-box-like/WD repeat-containing protein TBL1Y                       | 247,891       | 271,242       | 231,548       | 294,587       | 29,454     | 70,012     | 44,551     | 33,354     | 1.2  | 0.05  |
| IPI00549189 | THOP1    | Thimet oligopeptidase                                               | 5,711,960     | 6,490,720     | 5,884,190     | 7,028,870     | 688,883    | 900,223    | 1,088,840  | 297,534    | 1.2  | 0.004 |
| IPI00908580 | TM9SF4   | Transmembrane 9 superfamily protein member 4                        | 2,168,597     | 2,301,517     | 2,176,830     | 2,613,347     | 326,391    | 326,558    | 276,656    | 203,674    | 1.2  | 0.03  |
| IPI00216134 | TPM1     | Tropomyosin alpha-1 chain, isoform 7                                | 2,494,766     | 2,605,056     | 2,556,987     | 3,005,176     | 293,532    | 249,107    | 230,145    | 174,212    | 1.2  | 0.01  |
| IPI00745267 | TPM1     | Tropomyosin alpha-1 chain, isoform 2                                | 1,905,808     | 1,870,925     | 1,951,829     | 2,248,339     | 253,290    | 136,474    | 184,989    | 136,499    | 1.2  | 0.03  |
| IPI00854592 | TPM3     | Tropomyosin 3                                                       | 3,025,234     | 3,218,272     | 3,289,434     | 3,591,324     | 400,390    | 300,373    | 559,955    | 239,488    | 1.2  | 0.03  |
| IPI00301503 | TRA2B    | Transformer-2 protein homolog beta, isoform 1                       | 6,403,493     | 6,730,596     | 6,677,757     | 7,755,923     | 952,517    | 563,953    | 969,663    | 352,634    | 1.2  | 0.03  |
| IPI00438230 | TRIM28   | Transcription intermediary factor 1-beta, isoform 2                 | 38,143,790    | 39,384,506    | 37,022,863    | 44,842,228    | 3,983,353  | 2,932,109  | 4,944,604  | 4,218,147  | 1.2  | 0.03  |
| IPI00018768 | TSN      | Translin                                                            | 2,327,318     | 2,472,628     | 2,686,020     | 2,878,738     | 258,077    | 188,101    | 371,967    | 315,042    | 1.2  | 0.02  |
| IPI00552768 | TXN      | Thioredoxin                                                         | 31,985,990    | 35,131,210    | 34,580,476    | 37,897,828    | 4,513,361  | 3,086,704  | 4,983,447  | 2,355,343  | 1.2  | 0.03  |
| IPI00797323 | TXNDC17  | Thioredoxin domain-containing protein 17                            | 878,660       | 966,205       | 803,810       | 1,042,590     | 136,500    | 147,381    | 155,112    | 78,162     | 1.2  | 0.05  |
| IPI00514154 | UCHL3    | Ubiquitin carboxyl-terminal hydrolase isozyme L                     | 4,218,405     | 3,985,295     | 3,659,445     | 4,921,085     | 314,313    | 1,248,751  | 763,036    | 142,787    | 1.2  | 0.002 |
| IPI00964927 | UGDH     | UDP-glucose 6-dehydrogenase, isoform 3                              | 21,820,299    | 23,295,522    | 21,990,176    | 25,417,752    | 2,856,594  | 1,364,866  | 3,840,749  | 1,578,444  | 1.2  | 0.04  |
| IPI00215861 | USH1C    | Harmonin, isoform 2                                                 | 1,501,286     | 1,788,704     | 1,583,132     | 1,849,090     | 255,512    | 228,478    | 318,559    | 108,883    | 1.2  | 0.02  |
| IPI00549343 | VAMP3    | Vesicle-associated membrane protein 3                               | 8,914,590     | 9,474,870     | 9,449,800     | 10,673,910    | 1,488,003  | 1,162,722  | 1,370,449  | 601,104    | 1.2  | 0.04  |
| IPI00006211 | VAPB     | Vesicle-associated membrane protein-associated protein B/C, isoform | 2,316,372     | 2,620,341     | 2,422,747     | 2,790,004     | 307,525    | 297,565    | 397,304    | 341,096    | 1.2  | 0.05  |
| IPI00184402 | VAT1     | Synaptic vesicle membrane protein VAT-1 homolog                     | 1,061,185     | 1,197,800     | 1,137,005     | 1,286,358     | 200,595    | 158,218    | 191,905    | 96,671     | 1.2  | 0.05  |
| IPI00295400 | WARS     | Tryptophanyl-tRNA synthetase, cytoplasmic, isoform 1                | 12,387,775    | 13,506,125    | 12,830,140    | 15,136,420    | 1,628,908  | 1,373,244  | 1,901,293  | 1,246,457  | 1.2  | 0.02  |
| IPI00412737 | WARS     | Tryptophanyl-tRNA synthetase, cytoplasmic isoform b                 | 8,370,595     | 8,878,215     | 8,769,360     | 10,020,990    | 1,096,716  | 1,291,881  | 1,451,227  | 1,037,380  | 1.2  | 0.04  |
| IPI00903228 | WDR20    | WD repeat-containing protein 20                                     | 6,801,620     | 7,788,100     | 8,939,070     | 8,007,110     | 798,107    | 868,157    | 1,669,082  | 785,849    | 1.2  | 0.04  |
| IPI00165434 | YLPM1    | YLP motif-containing protein 1, isoform 4                           | 645,754       | 645,829       | 653,594       | 762,957       | 50,950     | 56,669     | 110,373    | 47,255     | 1.2  | 0.005 |
| IPI00175079 | -        | Uncharacterized protein                                             | 6,792,530     | 6,510,730     | 6,945,210     | 7,778,730     | 852,627    | 441,199    | 664,162    | 480,501    | 1.1  | 0.05  |
| IPI00169280 | AKR7L    | Aflatoxin B1 aldehyde reductase member 4, isoform 1                 | 1,877,543     | 1,944,651     | 1,934,573     | 2,146,611     | 171,779    | 237,372    | 276,590    | 147,271    | 1.1  | 0.03  |
| IPI00982009 | AP2A2    | Adapter-related protein complex 2 alpha-2 subunit                   | 1,886,873     | 1,768,682     | 2,035,215     | 2,167,422     | 177,917    | 247,202    | 300,283    | 176,297    | 1.1  | 0.04  |
| IPI00186946 | COL25A1  | Collagen alpha-1(XXV) chain, isoform 1                              | 677,404       | 728,006       | 780,400       | 766,508       | 41,628     | 46,263     | 158,823    | 77,724     | 1.1  | 0.05  |
| IPI00604566 | DFFA     | DNA fragmentation factor subunit alpha, isoform DFF35               | 3,902,936     | 4,042,120     | 4,327,095     | 4,213,555     | 145,277    | 259,962    | 431,633    | 153,265    | 1.1  | 0.01  |
| IPI00038378 | ENOPH1   | Enolase-phosphatase E1, isoform 1                                   | 1,159,793     | 1,246,913     | 1,497,390     | 1,328,037     | 100,797    | 336,035    | 206,150    | 100,536    | 1.1  | 0.03  |
| IPI00022143 | ESYT1    | Extended synaptotagmin-1, isoform 1                                 | 5,335,292     | 6,126,168     | 5,439,788     | 6,124,905     | 490,856    | 505,894    | 842,811    | 506,160    | 1.1  | 0.04  |
| IPI00794573 | GSR      | Glutathione reductase, mitochondrial, splice variant or isoform     | 1,832,165     | 1,835,943     | 1,928,809     | 2,099,860     | 137,576    | 146,490    | 190,422    | 198,328    | 1.1  | 0.04  |
| IPI00953696 | GSR      | Glutathione reductase, mitochondrial, isoform 4                     | 9,515,285     | 9,496,659     | 9,276,141     | 10,865,942    | 1,071,779  | 862,239    | 944,426    | 775,108    | 1.1  | 0.05  |
| IPI00008475 | HMGCS1   | Hydroxymethylglutaryl-CoA synthase, cytoplasmic                     | 19,145,045    | 20,508,617    | 19,692,580    | 21,854,415    | 1,880,930  | 1,036,908  | 2,427,723  | 1,838,669  | 1.1  | 0.05  |
| IPI01010895 | HSPA4    | Heat shock 70 kDa protein 4                                         | 15,388,345    | 16,360,790    | 16,120,340    | 17,505,325    | 1,537,059  | 474,620    | 2,360,972  | 1,201,494  | 1.1  | 0.04  |
| IPI00909299 | KIF5B    | Kinesin heavy chain                                                 | 8,031,952     | 7,652,637     | 8,518,890     | 8,917,633     | 624,029    | 616,642    | 426,989    | 502,723    | 1.1  | 0.04  |
| IPI00827967 | PARF     | GTP-binding protein Parf, isoform 2                                 | 3,124,062     | 3,404,615     | 3,544,560     | 3,581,181     | 298,712    | 279,679    | 382,893    | 286,675    | 1.1  | 0.04  |
| IPI01009353 | PGD      | 6-phosphogluconate dehydrogenase, decarboxylating                   | 8,648,019     | 9,043,201     | 9,198,225     | 9,910,266     | 1,090,197  | 1,094,837  | 1,314,120  | 559,201    | 1.1  | 0.05  |
| IPI00984629 | PKP3     | Plakophilin-3, splice variant or isoform                            | 9,776,407     | 10,685,250    | 9,714,470     | 11,112,183    | 1,092,797  | 1,031,322  | 1,223,831  | 621,460    | 1.1  | 0.04  |
| IPI00868717 | PRRC1    | Protein PRRC1, isoform 4                                            | 2,466,762     | 2,449,355     | 2,451,777     | 2,827,940     | 313,457    | 302,985    | 373,670    | 133,493    | 1.1  | 0.05  |
| IPI00171199 | PSMA3    | Proteasome subunit alpha type-3, isoform 2                          | 5,300,015     | 5,763,315     | 5,135,095     | 6,026,710     | 399,081    | 357,663    | 809,896    | 342,157    | 1.1  | 0.01  |
| IPI00788942 | RUVBL1   | RuvB-like 1, isoform 2                                              | 1,017,675,425 | 1,094,301,655 | 1,062,111,405 | 1,097,480,705 | 37,107,235 | 21,401,489 | 53,743,973 | 55,453,314 | 1.1  | 0.03  |
| IPI00021187 | RUVBL1   | RuvB-like 1, isoform 1                                              | 1,037,672,235 | 1,112,875,465 | 1,084,131,090 | 1,119,546,130 | 34,313,921 | 24,055,727 | 58,424,329 | 55,788,786 | 1.1  | 0.02  |
| IPI00910487 | SERPINH1 | Serpin H1 (collagen-binding protein 2)                              | 14,490,395    | 14,402,974    | 15,530,133    | 15,949,060    | 473,044    | 851,289    | 1,168,213  | 1,010,741  | 1.1  | 0.02  |
| IPI00917386 | SSB      | Lupus La protein                                                    | 2,461,690     | 2,509,816     | 2,503,488     | 2,729,986     | 159,240    | 170,461    | 438,116    | 178,693    | 1.1  | 0.04  |
| IPI00026328 | TXNDC12  | Thioredoxin domain-containing protein 12                            | 21,870,370    | 23,528,120    | 21,841,990    | 24,231,220    | 2,035,529  | 1,371,493  | 2,932,049  | 1,120,051  | 1.1  | 0.05  |
| IPI00646689 | TXNDC17  | Thioredoxin domain-containing protein 17, splice variant or isoform | 4,535,439     | 4,807,255     | 4,671,208     | 5,083,942     | 449,344    | 348,352    | 712,545    | 224,830    | 1.1  | 0.04  |
| IPI00029019 | UBAP2L   | Ubiquitin-associated protein 2-like, isoform 2                      | 8,151,325     | 8,699,354     | 8,153,764     | 9,257,556     | 756,580    | 457,241    | 1,193,772  | 378,685    | 1.1  | 0.02  |
| IPI00893487 | VARS     | Valyl-tRNA synthetase                                               | 450,027       | 474,799       | 467,707       | 515,303       | 48,449     | 40,280     | 47,948     | 35,365     | 1.1  | 0.04  |
| IPI00879792 | CYBSR3   | Cytochrome b5 reductase 3                                           | 1,747,740     | 1,657,068     | 1,775,358     | 1,549,320     | 153,448    | 108,063    | 212,601    | 101,856    | -1.1 | 0.04  |
| IPI00910220 | ASNA1    | Arsenical pump-driving ATPase                                       | 1,633,570     | 1,414,535     | 1,710,910     | 1,318,595     | 177,518    | 220,548    | 316,839    | 163,962    | -1.2 | 0.02  |
| IPI00290085 | CDH2     | Cadherin-2                                                          | 2,913,540     | 2,698,565     | 2,997,730     | 2,522,150     | 273,293    | 424,997    | 238,360    | 228,705    | -1.2 | 0.04  |

|             |         |                                             |            |            |            |            |           |           |           |           |      |       |
|-------------|---------|---------------------------------------------|------------|------------|------------|------------|-----------|-----------|-----------|-----------|------|-------|
| IPI00103146 | PDLIM5  | PDZ and LIM domain protein 5, isoform 3     | 2,382,375  | 2,114,013  | 2,346,475  | 1,948,700  | 203,858   | 398,889   | 328,070   | 205,183   | -1.2 | 0.01  |
| IPI00007935 | PDLIM5  | PDZ and LIM domain protein 5, isoform 1     | 4,846,642  | 4,458,863  | 4,764,475  | 4,156,000  | 265,702   | 331,580   | 404,064   | 249,623   | -1.2 | 0.003 |
| IPI00181265 | CCDC120 | Coiled-coil domain-containing protein 120   | 1,284,453  | 975,378    | 1,262,598  | 998,423    | 176,919   | 163,713   | 147,041   | 160,019   | -1.3 | 0.03  |
| IPI00410110 | DHX40   | ATP-dependent RNA helicase DHX40, isoform 1 | 316,200    | 260,572    | 316,003    | 245,278    | 33,552    | 55,160    | 95,354    | 54,564    | -1.3 | 0.04  |
| IPI00550364 | PGM2    | Phosphoglucomutase-2                        | 2,690,850  | 1,973,080  | 2,752,345  | 2,022,460  | 409,120   | 472,895   | 875,150   | 346,758   | -1.3 | 0.02  |
| IPI00014958 | PON2    | Serum paraoxonase/arylesterase 2, isoform 1 | 922,972    | 754,042    | 886,480    | 699,460    | 139,554   | 107,819   | 50,099    | 110,104   | -1.3 | 0.02  |
| IPI00789296 | SRP14   | Signal recognition particle 14 kDa protein  | 31,569,700 | 24,049,300 | 32,100,400 | 23,331,100 | 3,358,725 | 5,044,425 | 6,060,319 | 2,690,227 | -1.4 | 0.003 |
| IPI00872250 | PDZK1P1 | Putative PDZ domain-containing protein 1P   | 1,002,830  | 689,265    | 1,161,155  | 667,728    | 237,202   | 198,304   | 429,933   | 175,589   | -1.5 | 0.03  |
